# Supplementary material for: New Boron Containing Acridines: Synthesis and Preliminary Biological Study
Source: MDPI journal article supplement (doi:10.3390/molecules28186636), 2023-09-15
Supplement: s1 [file s1]

## SUPPORTING INFORMATION

### New Boron Containing Acridines: Synthesis and Preliminary Biological Study

Anna A. Druzina<sup>1,\*</sup>, Nadezhda V. Dudarova<sup>1</sup>, Ivan. V. Ananyev<sup>2</sup>, Anastasia A. Antonets<sup>3</sup>, Dmitry N. Kaluzhny<sup>4</sup>, Alexey A. Nazarov<sup>3</sup>, Igor B. Sivaev<sup>1,5</sup> and Vladimir I. Bregadze<sup>1,†</sup>

<sup>1</sup> A.N. Nesmeyanov Institute of Organoelement Compounds, Russian Academy of Sciences, 28 Vavilov Str., 119991 Moscow, Russia; ilinova\_anna@mail.ru (A.A.D.); nadezjdino\_96@mail.ru (N.V.D.); sivaev@ineos.ac.ru (I.B.S.); bre@ineos.ac.ru (V.I.B).

<sup>2</sup> N.S. Kurnakov Institute of General and Inorganic Chemistry, Russian Academy of Sciences, 31 Leninskii pr., 119991 Moscow, Russia; i.ananyev@gmail.com (I.V.A.).

<sup>3</sup> Department of Chemistry, M.V. Lomonosov Moscow State University, 1/3 Leninskie Gory, 119991 Moscow, Russia; antonets.anastasia.a@gmail.com (A.A.A.); nazarov@med.chem.msu.ru (A.A.N.).

<sup>4</sup> V.A. Engelhardt Institute of Molecular Biology, Russian Academy of Sciences, 32 Vavilov Str., 11991 Moscow, Russia; uzhny@mail.ru (D.N.K.).

<sup>5</sup> Basic Department of Chemistry of Innovative Materials and Technologies, G.V. Plekhanov Russian University of Economics, 36 Stremyannyi Line, Moscow 117997, Russia; sivaev@ineos.ac.ru (I.B.S.).

\* Correspondence: ilinova\_anna@mail.ru; Tel.: +7-926-404-5566 (A.A.D.)

† Dedicated to John Kennedy on the occasion of his 80th Jubilee and in recognition of his outstanding contributions to inorganic and organometallic chemistry.

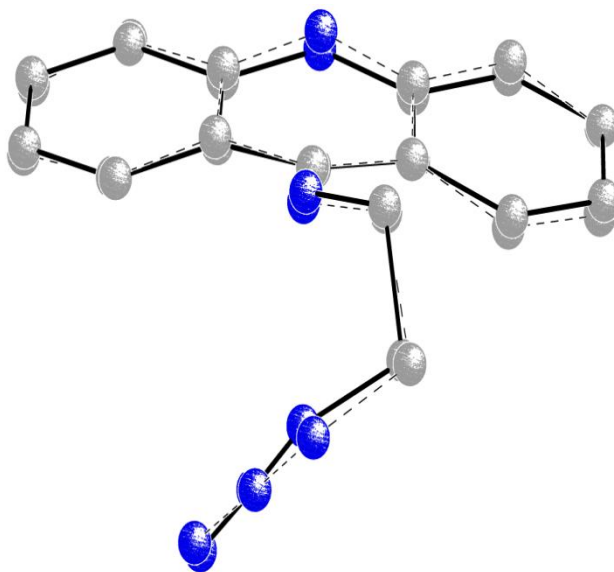

**Figure S1.** The best root-mean-square overlap for the isolated optimized (full lines) and crystal (dashed lines) structure of the substituted acridinium cation from **2**.

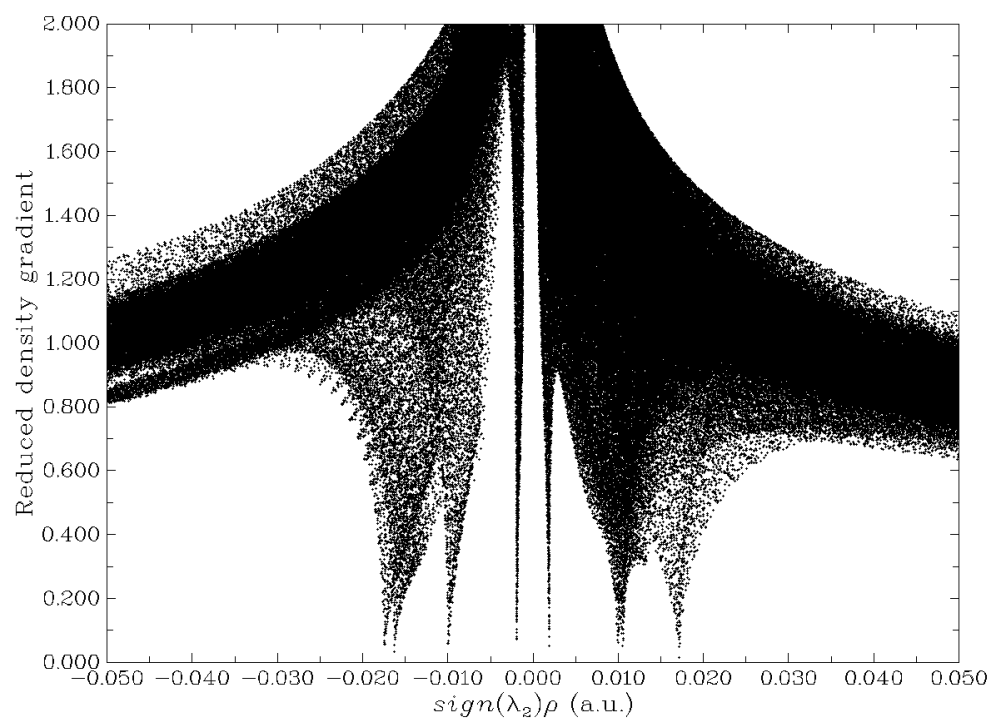

**Figure S2.** The  $\text{RDG}/\text{sign}(\lambda_2)\cdot q(\mathbf{r})$  in the area of substituent in the isolated optimized cation from **2**.

### Conjugate 7

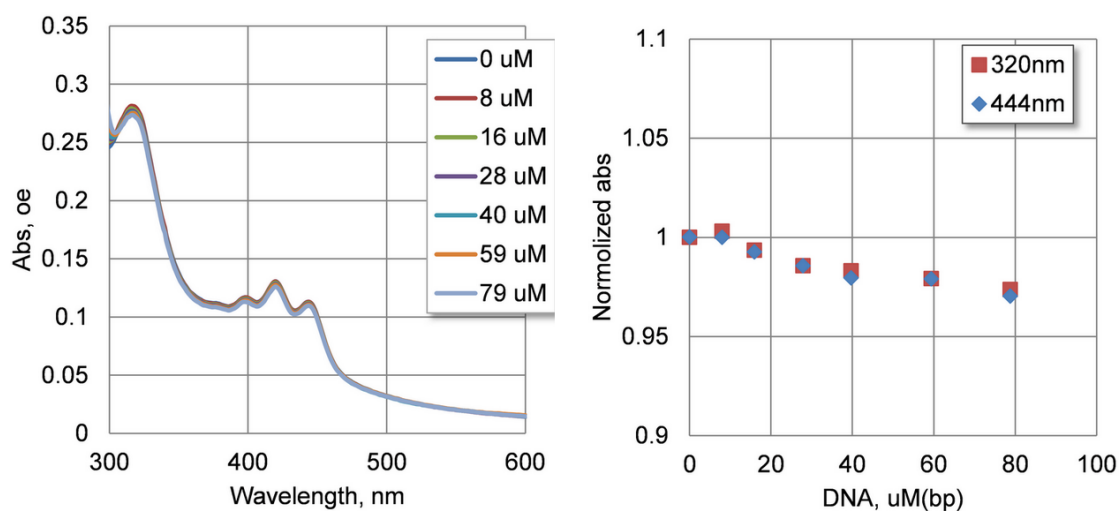

### Conjugate 9

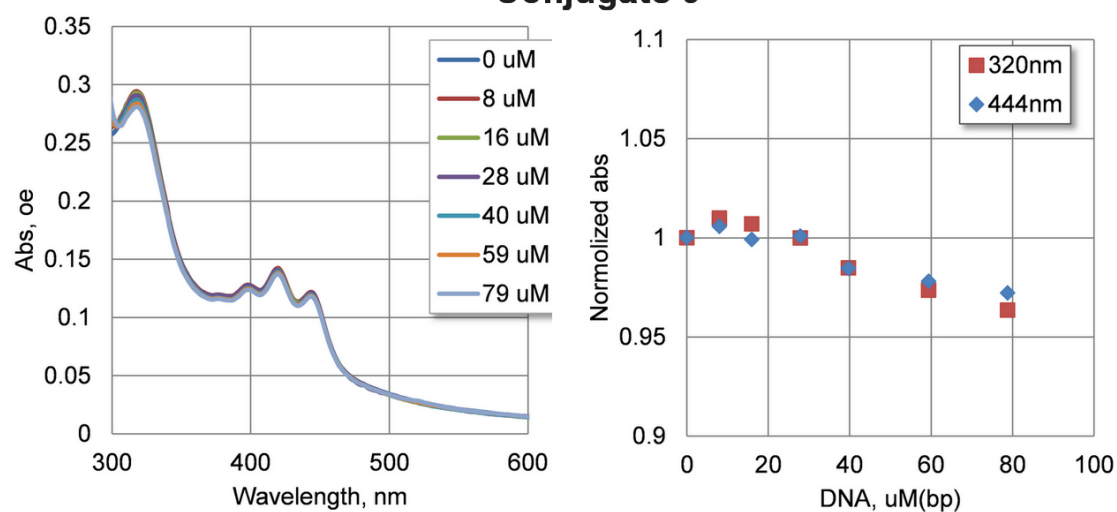

### Conjugate 10

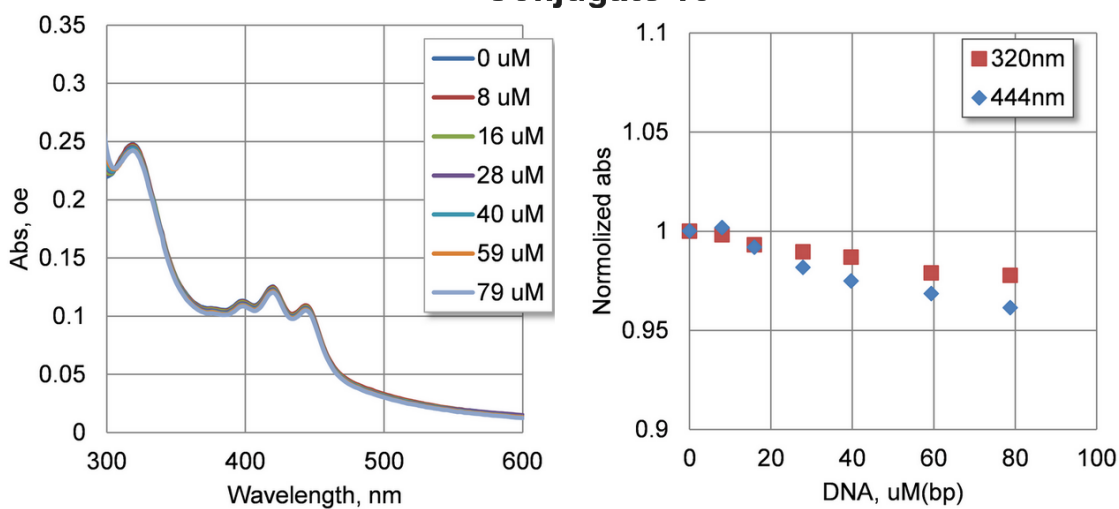

**Figure S3.** Changes of absorbance spectra upon DNA interaction for conjugates 7,9,10. 5 mkM compounds in 10 mM potassium phosphate buffer pH=8.0 and a calf thymus DNA in the range 0-80  $\mu\text{M}$  (b.p.).

$^1\text{H}$ ,  $^{11}\text{B}\{^1\text{H}\}$ ,  $^{11}\text{B}$  and  $^{13}\text{C}\{^1\text{H}\}$  NMR, IR and high-resolution mass spectra of compounds **2**, **7-10**

## Display Report

### Analysis Info

|               |                                                                     |                   |                     |
|---------------|---------------------------------------------------------------------|-------------------|---------------------|
| Analysis Name | D:\Data\Chizhov\INEOS\Bregadze\Druzina\Apr_17_2023\da-059_&clblow.d | Acquisition Date  | 17.04.2023 16:43:51 |
| Method        | tune_low.m                                                          | Operator          | BDAL@DE             |
| Sample Name   | /CHIZ DA-059                                                        | Instrument / Ser# | micrOTOF 10248      |
| Comment       | CH <sub>3</sub> CN 100 %, dil. 200, calibrant added                 |                   |                     |

### Acquisition Parameter

|             |            |                      |          |                  |           |
|-------------|------------|----------------------|----------|------------------|-----------|
| Source Type | ESI        | Ion Polarity         | Positive | Set Nebulizer    | 0.4 Bar   |
| Focus       | Not active |                      |          | Set Dry Heater   | 180 °C    |
| Scan Begin  | 50 m/z     | Set Capillary        | 4500 V   | Set Dry Gas      | 4.0 l/min |
| Scan End    | 3000 m/z   | Set End Plate Offset | -500 V   | Set Divert Valve | Waste     |

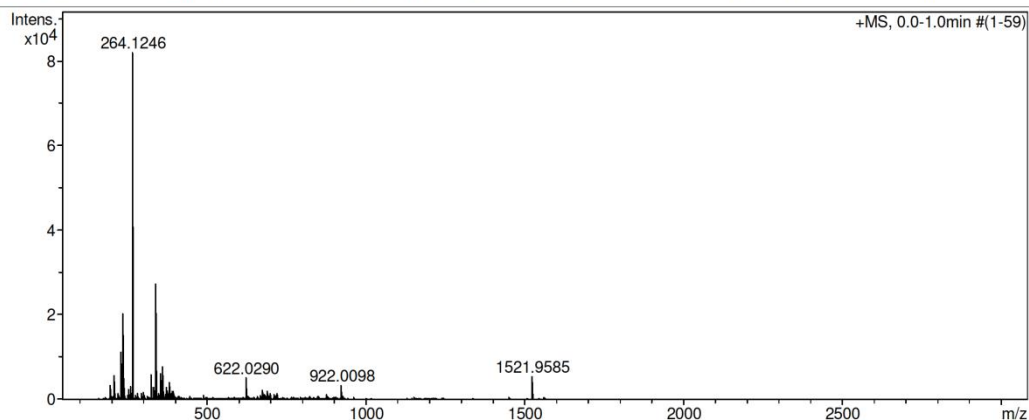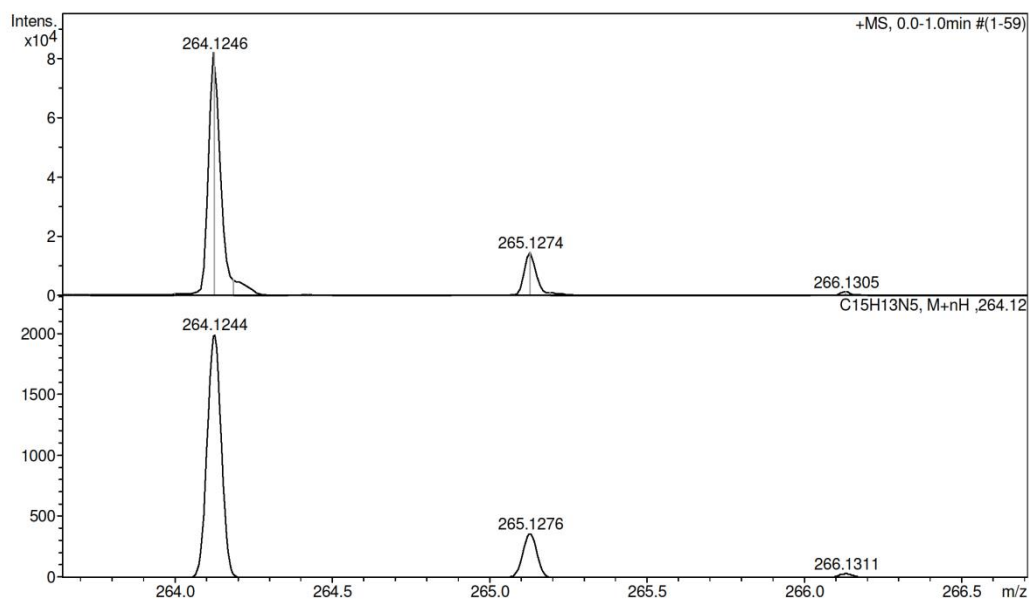

**Figure S4.** ESI-HRMS spectrum of compound **2**

## Display Report

### Analysis Info

Analysis Name D:\Data\Chizhov\INEOS\Druzina\Apr\_18\_2023\da-051\_&clb-.d  
Method tune\_wide\_neg.m  
Sample Name /CHIZ DA-051  
Comment CH3CN 100 %, dil. 200, calibrant added

Acquisition Date 18.04.2023 17:40:18

Operator BDAL@DE  
Instrument / Ser# maXis 43

### Acquisition Parameter

|             |          |                      |          |                  |           |
|-------------|----------|----------------------|----------|------------------|-----------|
| Source Type | ESI      | Ion Polarity         | Negative | Set Nebulizer    | 0.4 Bar   |
| Focus       | Active   |                      |          | Set Dry Heater   | 180 °C    |
| Scan Begin  | 50 m/z   | Set Capillary        | 3000 V   | Set Dry Gas      | 4.0 l/min |
| Scan End    | 3000 m/z | Set End Plate Offset | -500 V   | Set Divert Valve | Waste     |

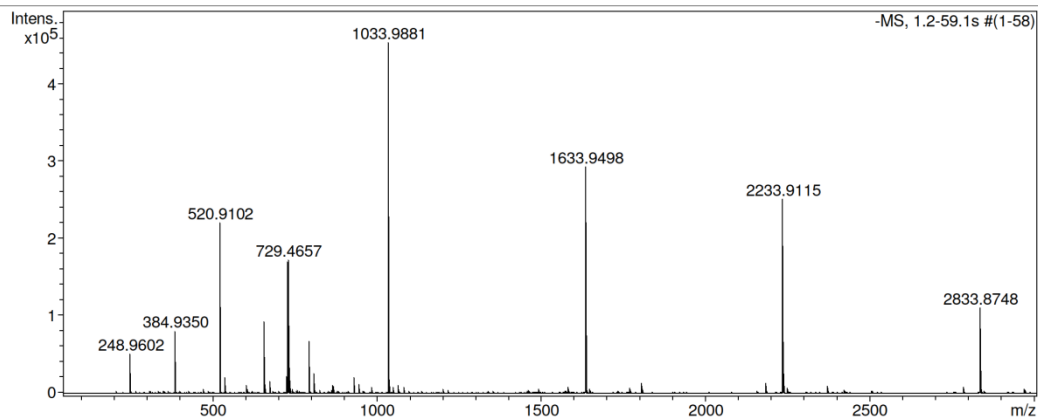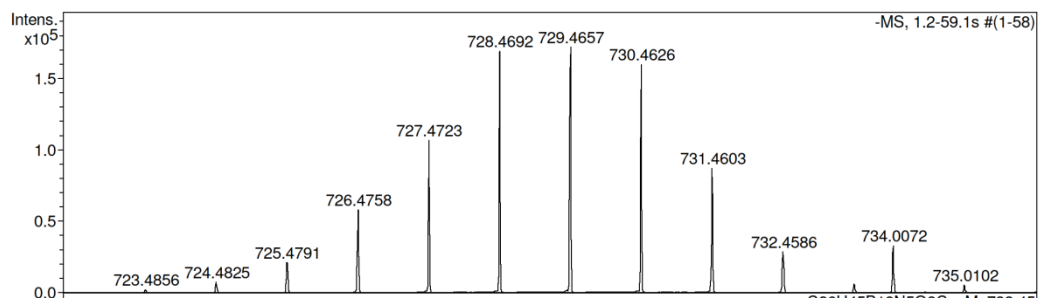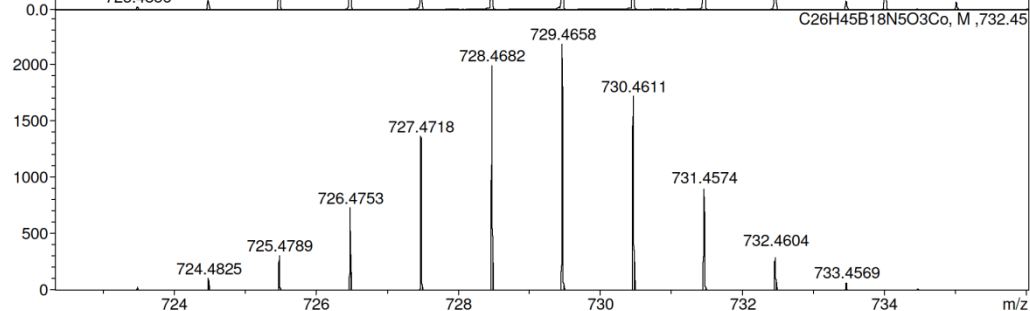

Figure S5. ESI-HRMS spectrum of compound 7

## Display Report

### Analysis Info

Analysis Name D:\Data\Chizhov\INEOS\Druzina\Apr\_18\_2023\da-052\_&clb-.d  
Method tune\_wide\_neg.m  
Sample Name /CHIZ DA-052  
Comment CH3CN 100 %, dil. 200, calibrant added

Acquisition Date 18.04.2023 17:47:37

Operator BDAL@DE  
Instrument / Ser# maXis 43

### Acquisition Parameter

|             |          |                      |          |                  |           |
|-------------|----------|----------------------|----------|------------------|-----------|
| Source Type | ESI      | Ion Polarity         | Negative | Set Nebulizer    | 0.4 Bar   |
| Focus       | Active   |                      |          | Set Dry Heater   | 180 °C    |
| Scan Begin  | 50 m/z   | Set Capillary        | 3000 V   | Set Dry Gas      | 4.0 l/min |
| Scan End    | 3000 m/z | Set End Plate Offset | -500 V   | Set Divert Valve | Waste     |

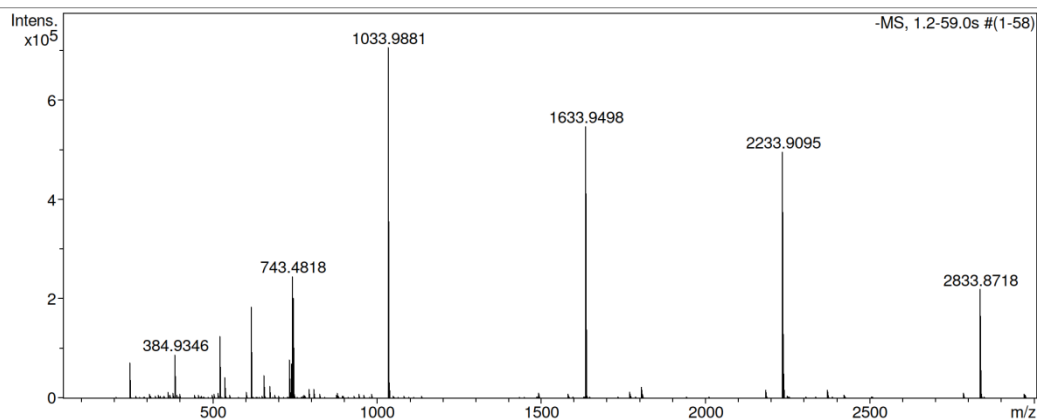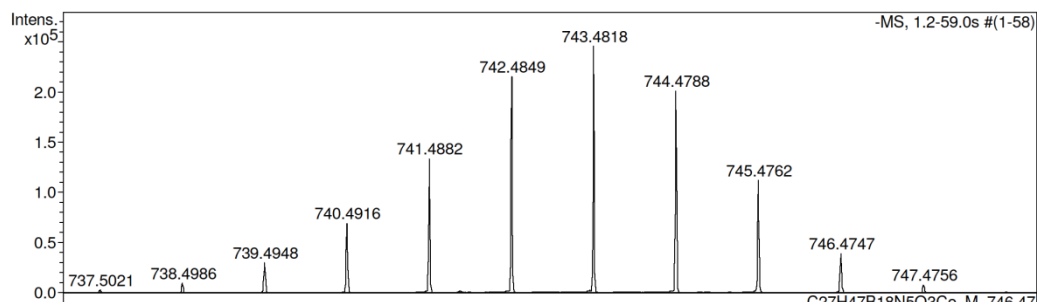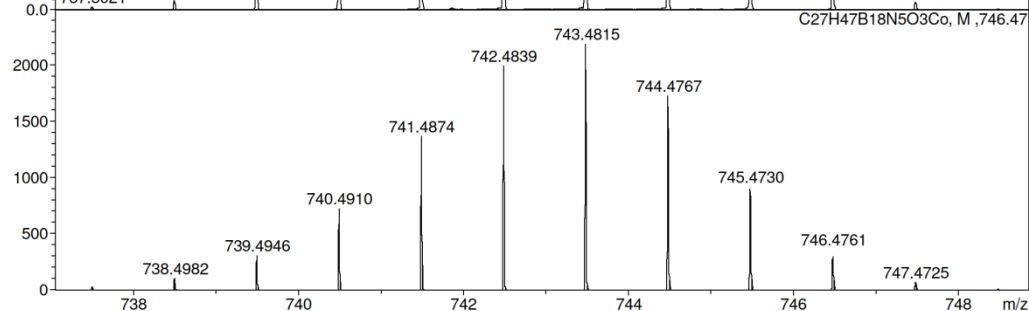

Figure S6. ESI-HRMS spectrum of compound 8

## Display Report

### Analysis Info

Analysis Name D:\Data\Chizhov\INEOS\Druzina\Apr\_18\_2023\da-053\_&clb-.d  
Method tune\_wide\_neg.m  
Sample Name /CHIZ DA-053  
Comment CH<sub>3</sub>CN 100 %, dil. 200, calibrant added

Acquisition Date 18.04.2023 17:53:03

Operator BDAL@DE  
Instrument / Ser# maXis 43

### Acquisition Parameter

|             |          |                      |          |                  |           |
|-------------|----------|----------------------|----------|------------------|-----------|
| Source Type | ESI      | Ion Polarity         | Negative | Set Nebulizer    | 0.4 Bar   |
| Focus       | Active   |                      |          | Set Dry Heater   | 180 °C    |
| Scan Begin  | 50 m/z   | Set Capillary        | 3000 V   | Set Dry Gas      | 4.0 l/min |
| Scan End    | 3000 m/z | Set End Plate Offset | -500 V   | Set Divert Valve | Waste     |

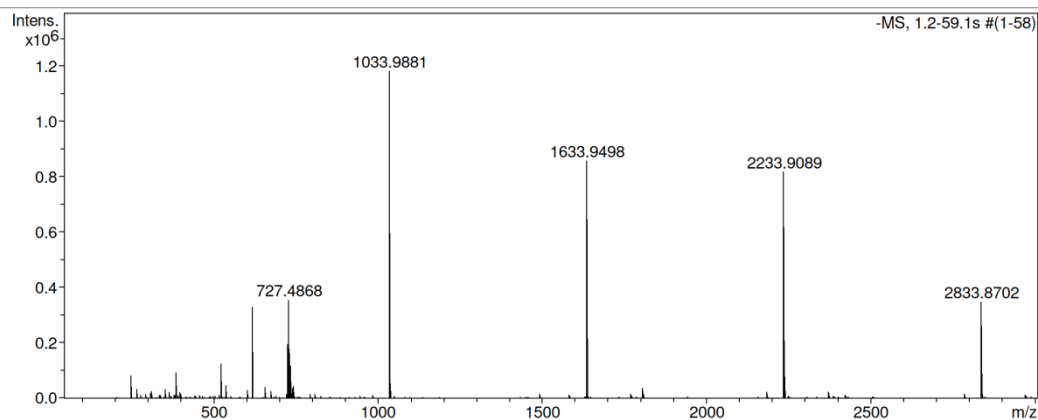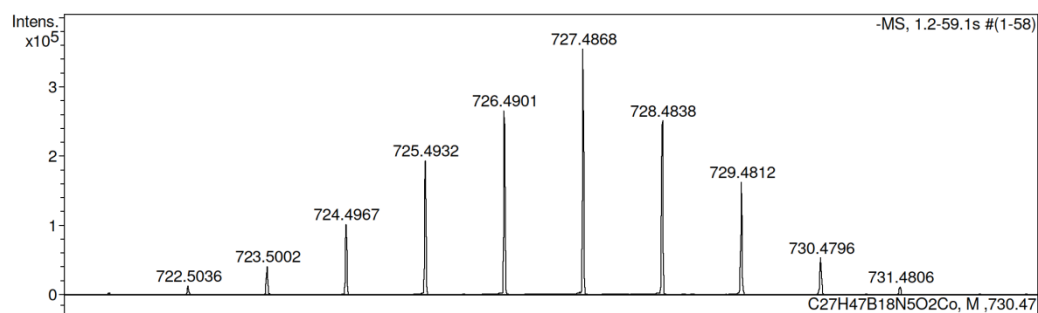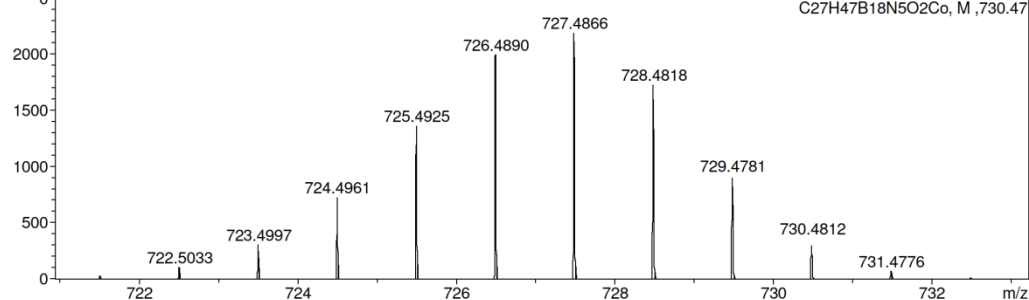

Figure S7. ESI-HRMS spectrum of compound 9

## Display Report

### Analysis Info

Analysis Name D:\Data\Chizhov\INEOS\Druzina\Apr\_18\_2023\da-054\_&clb-.d  
Method tune\_wide\_neg.m  
Sample Name /CHIZ DA-054  
Comment CH<sub>3</sub>CN 100 %, dil. 200, calibrant added

Acquisition Date 18.04.2023 17:59:10

Operator BDAL@DE  
Instrument / Ser# maXis 43

### Acquisition Parameter

|             |          |                      |          |                  |           |
|-------------|----------|----------------------|----------|------------------|-----------|
| Source Type | ESI      | Ion Polarity         | Negative | Set Nebulizer    | 0.4 Bar   |
| Focus       | Active   |                      |          | Set Dry Heater   | 180 °C    |
| Scan Begin  | 50 m/z   | Set Capillary        | 3000 V   | Set Dry Gas      | 4.0 l/min |
| Scan End    | 3000 m/z | Set End Plate Offset | -500 V   | Set Divert Valve | Waste     |

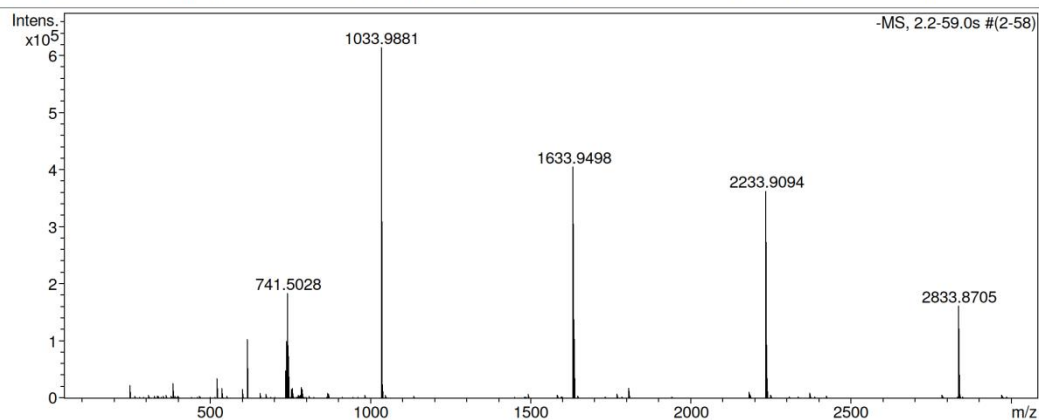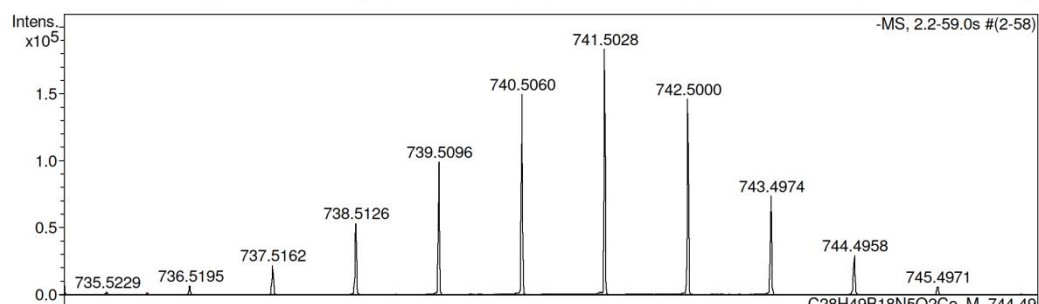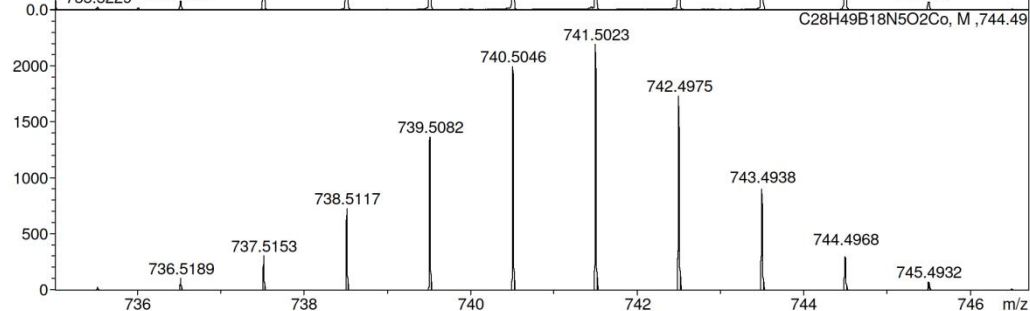

**Figure S8.** ESI-HRMS spectrum of compound 10



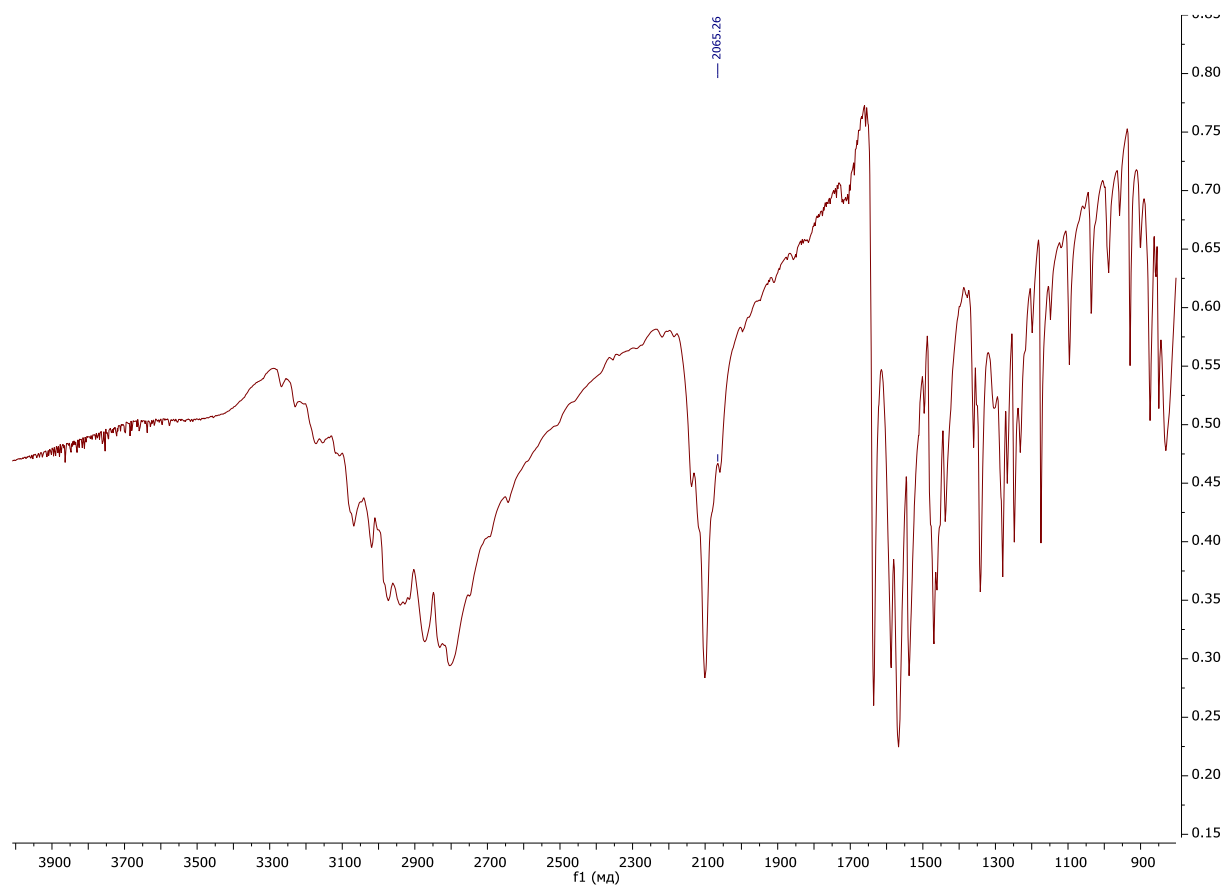

Figure S9. IR spectrum of compound 2

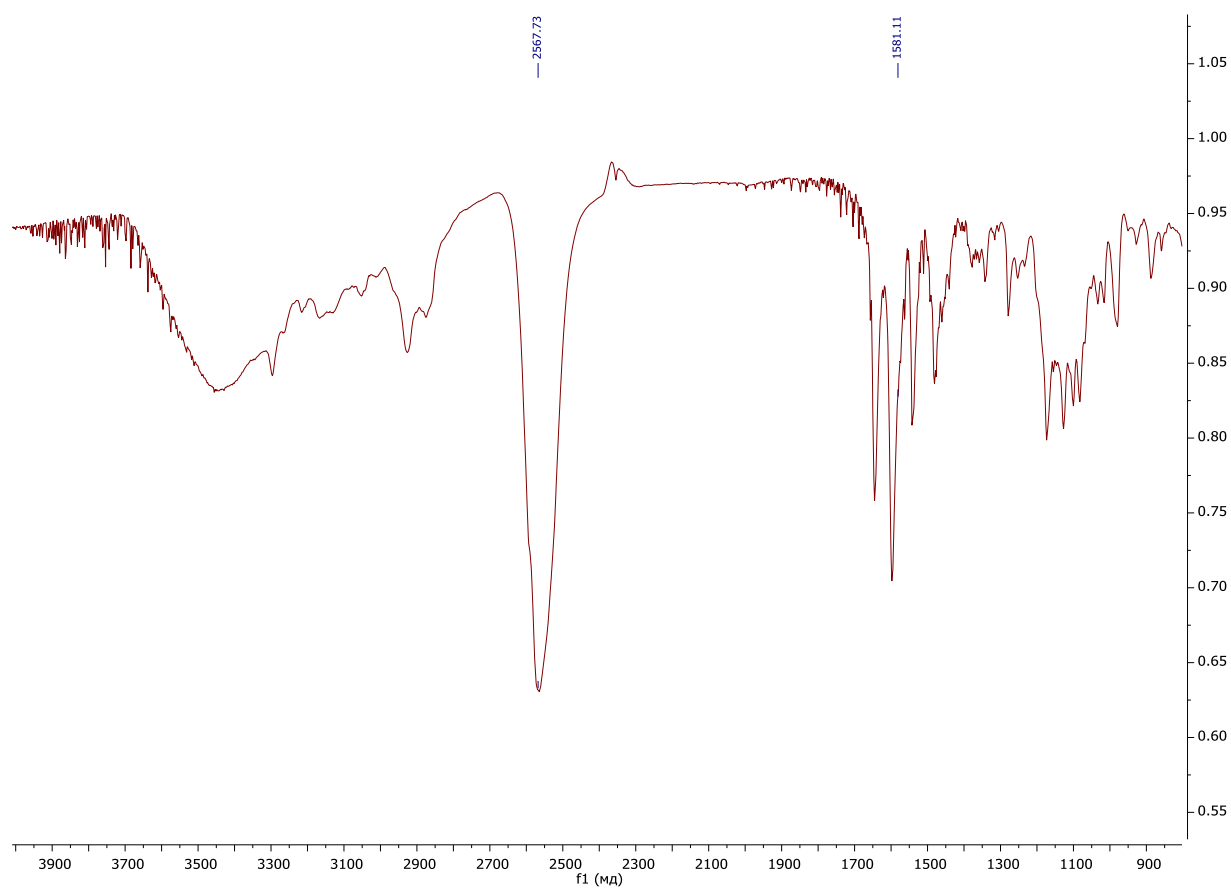

Figure S10. IR spectrum of compound 7

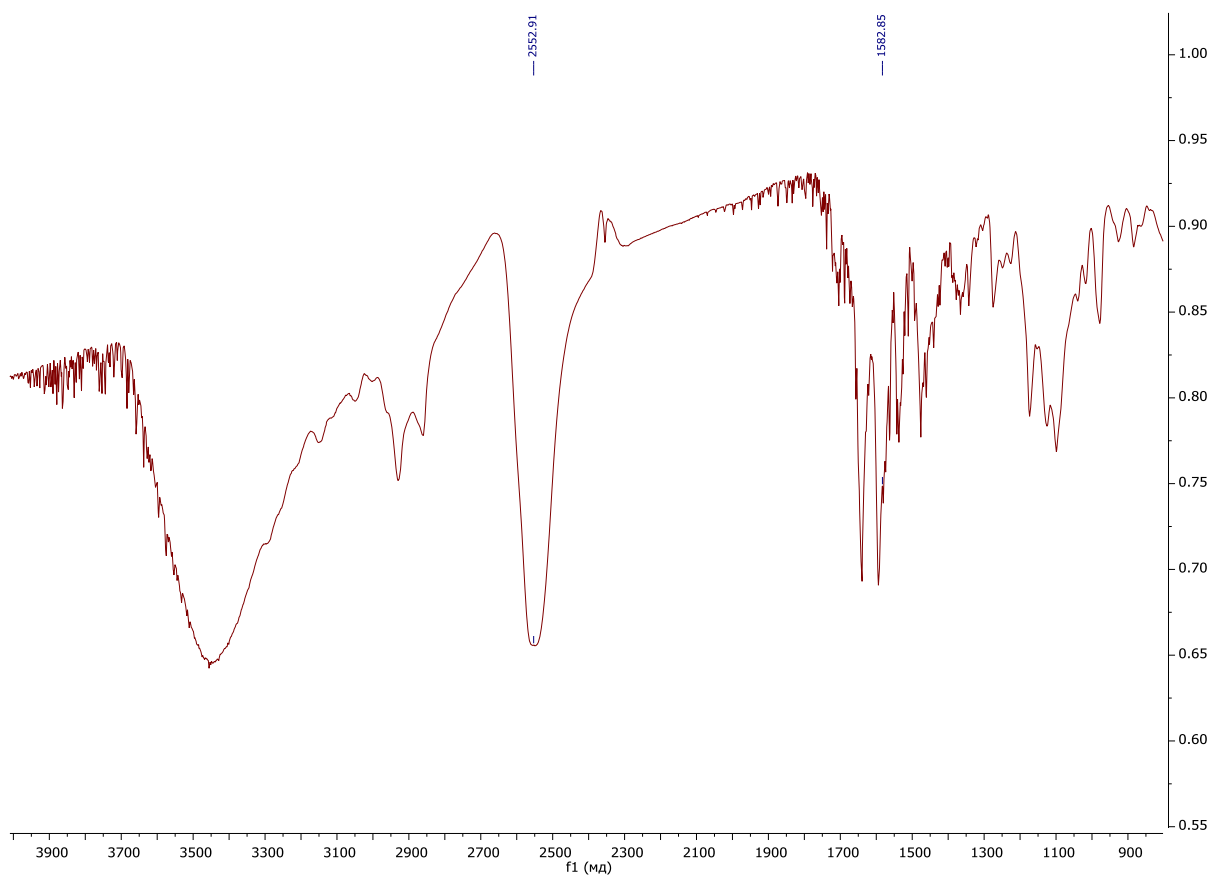

**Figure S11.** IR spectrum of compound **8**

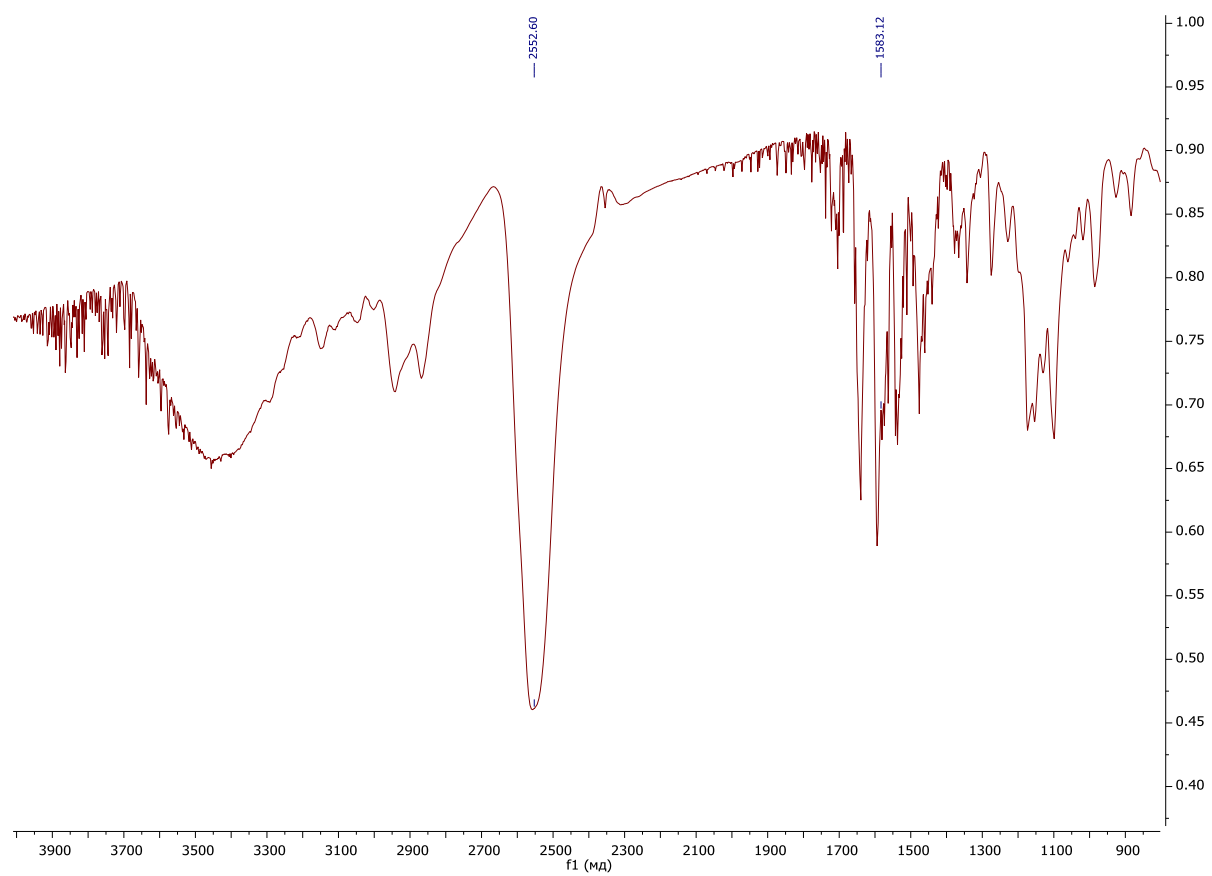

**Figure S12.** IR spectrum of compound **9**

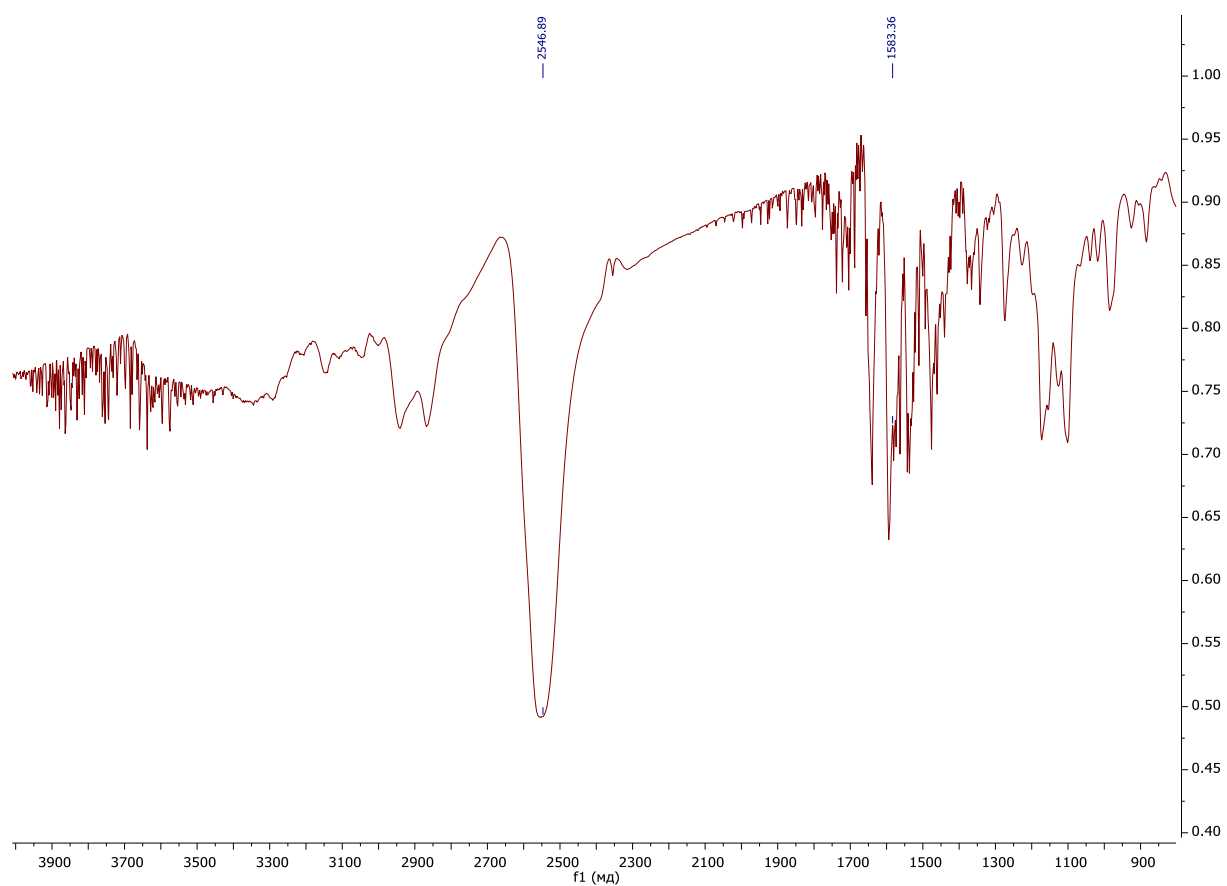

**Figure S13.** IR spectrum of compound **10**

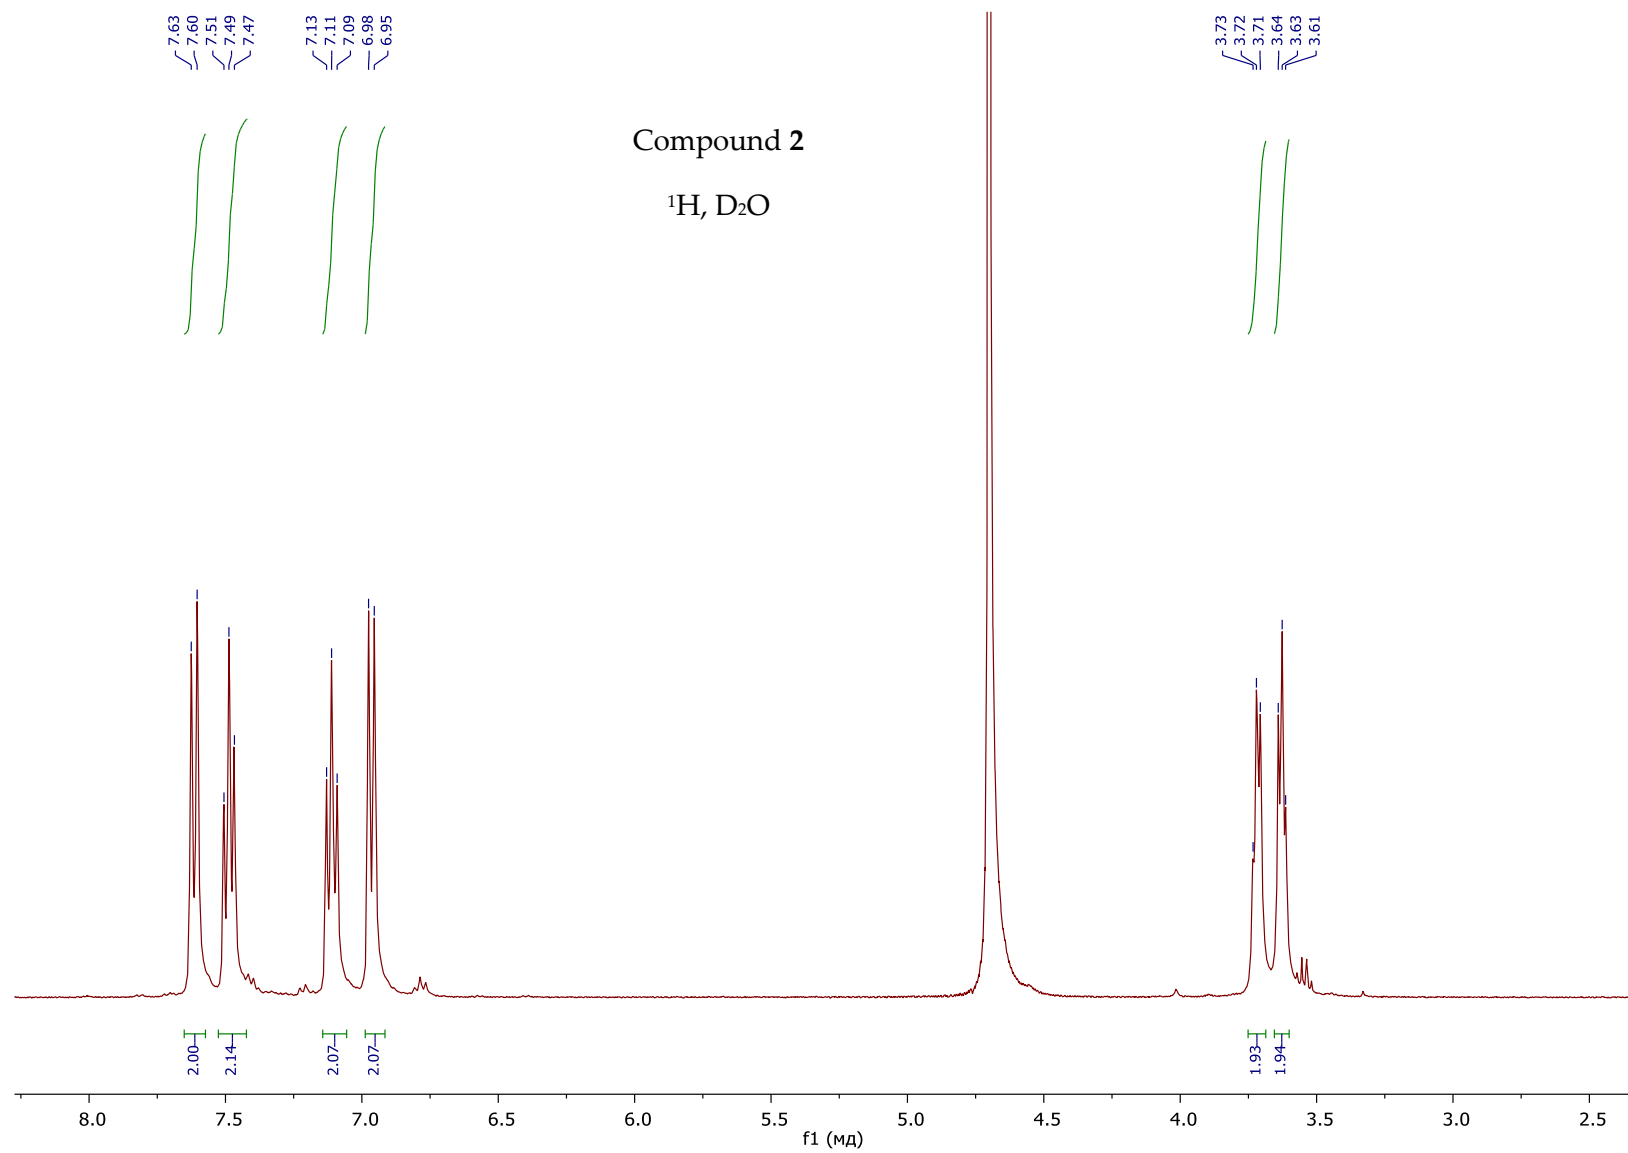

Figure S14.  $^1\text{H}$  NMR spectrum of compound 2

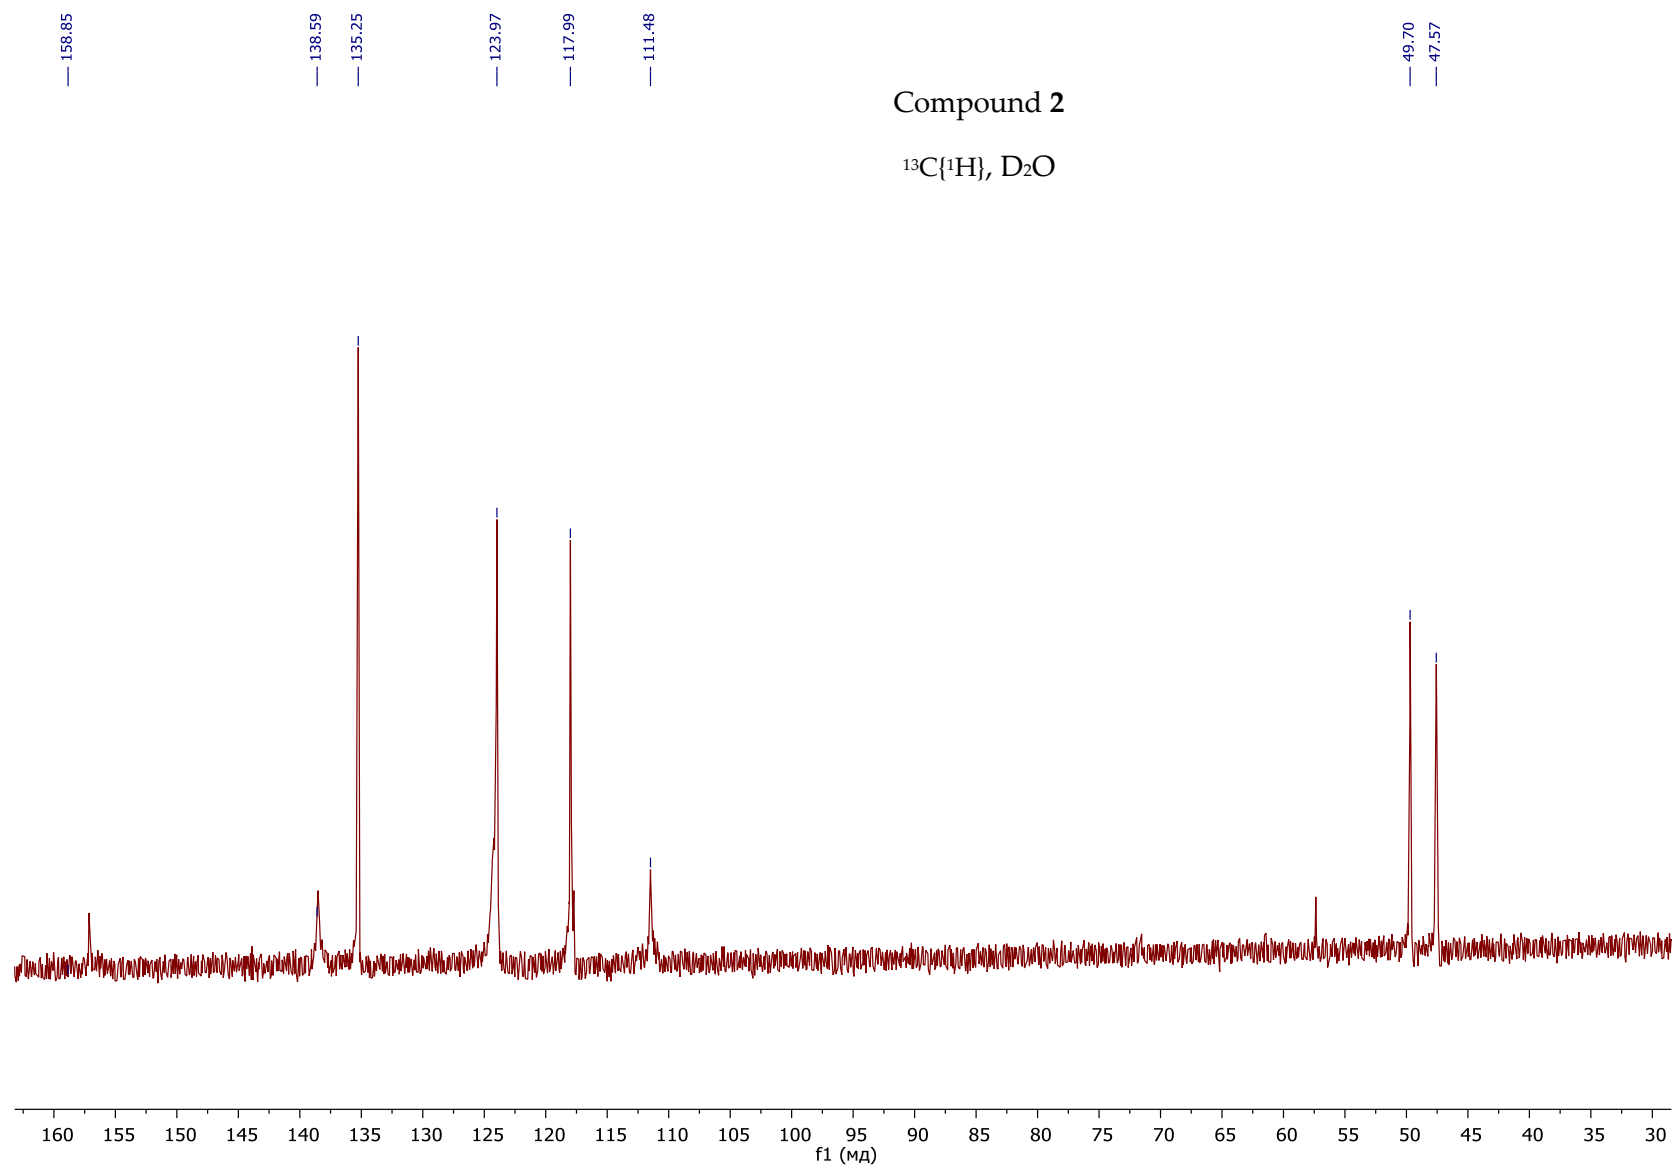

Figure S15.  $^{13}\text{C}\{^1\text{H}\}$  NMR spectrum of compound 2

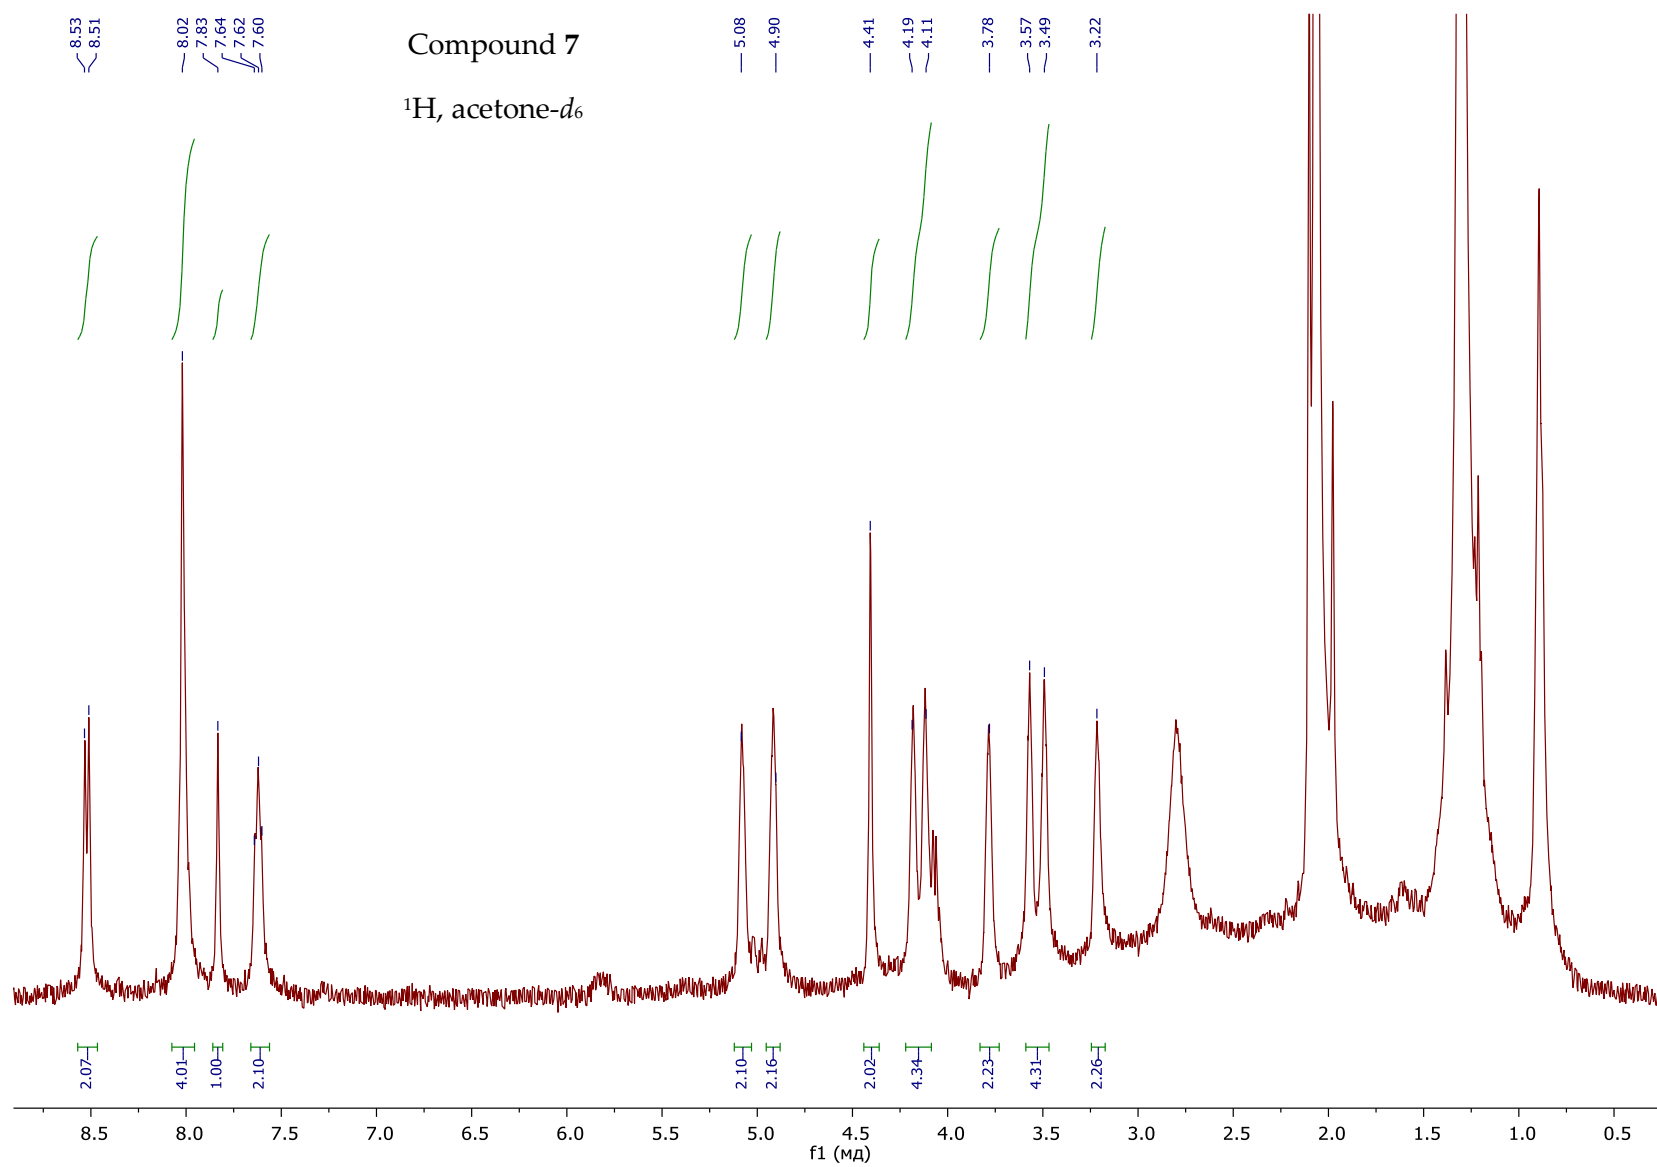

Figure S16.  $^1\text{H}$  NMR spectrum of compound 7

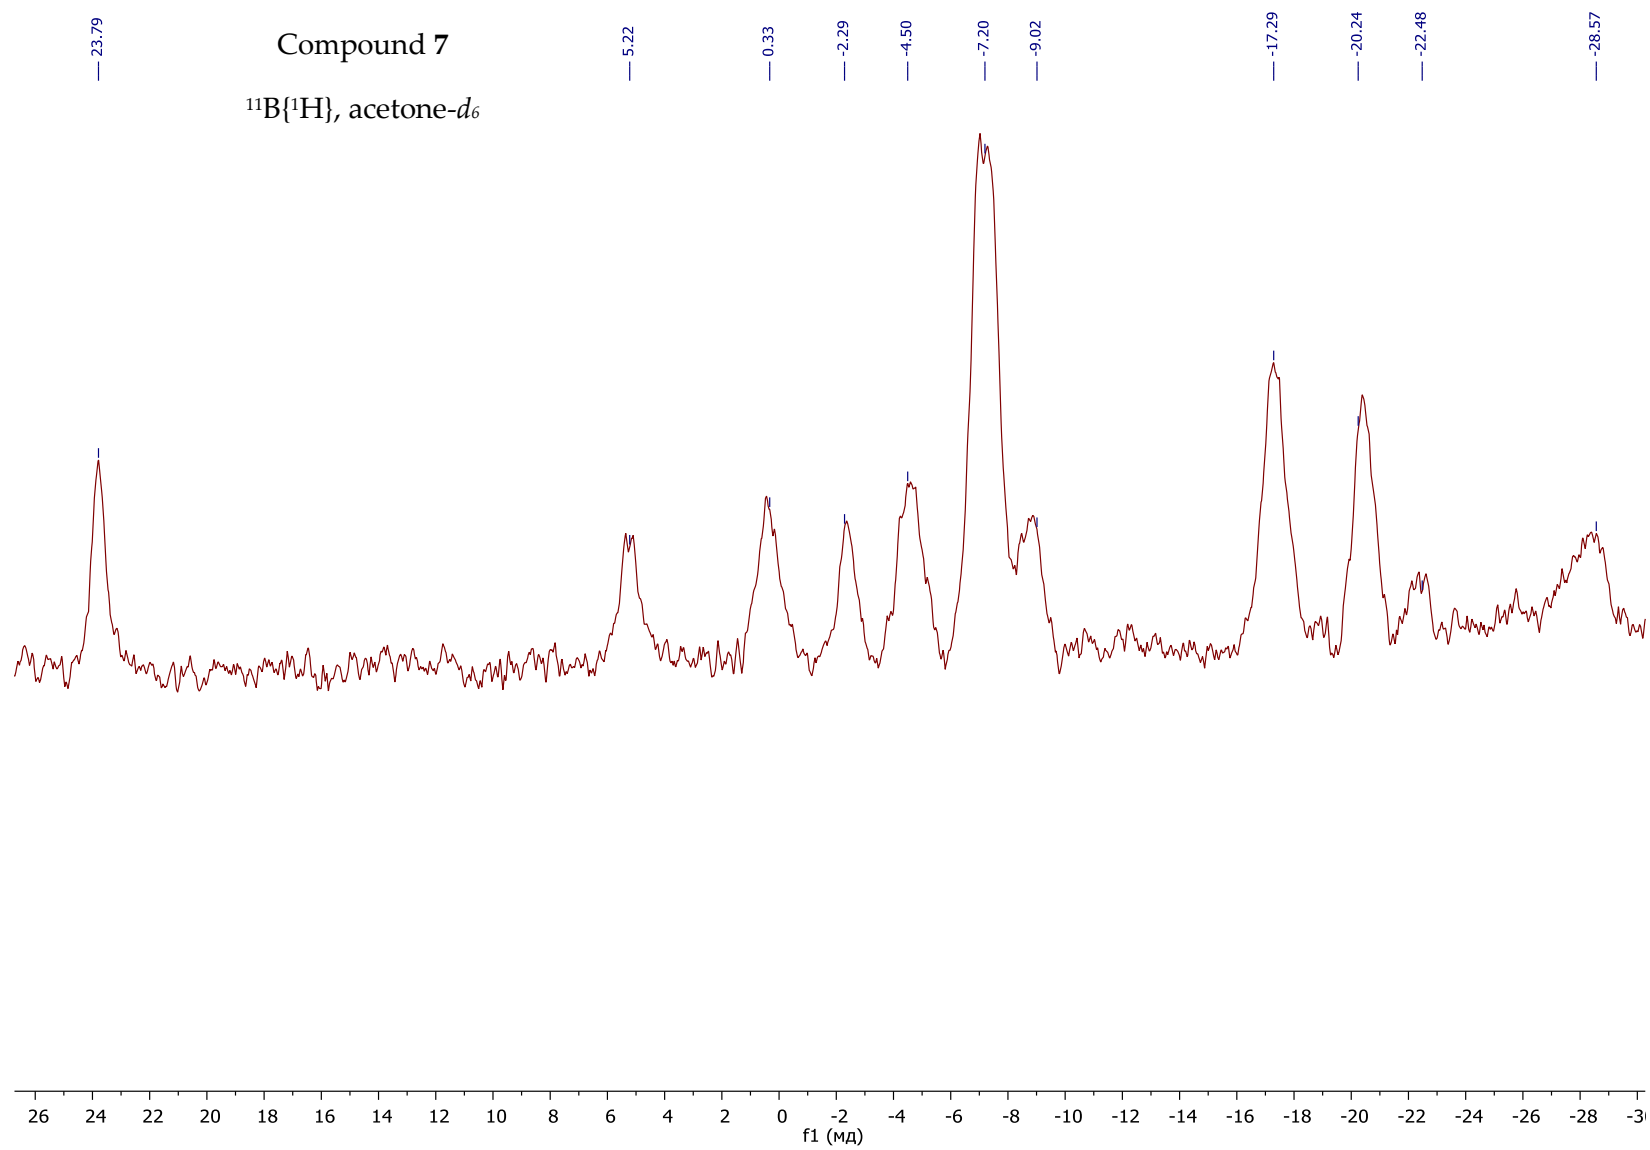

**Figure S17.**  $^{11}\text{B}\{^1\text{H}\}$  NMR spectrum of compound 7

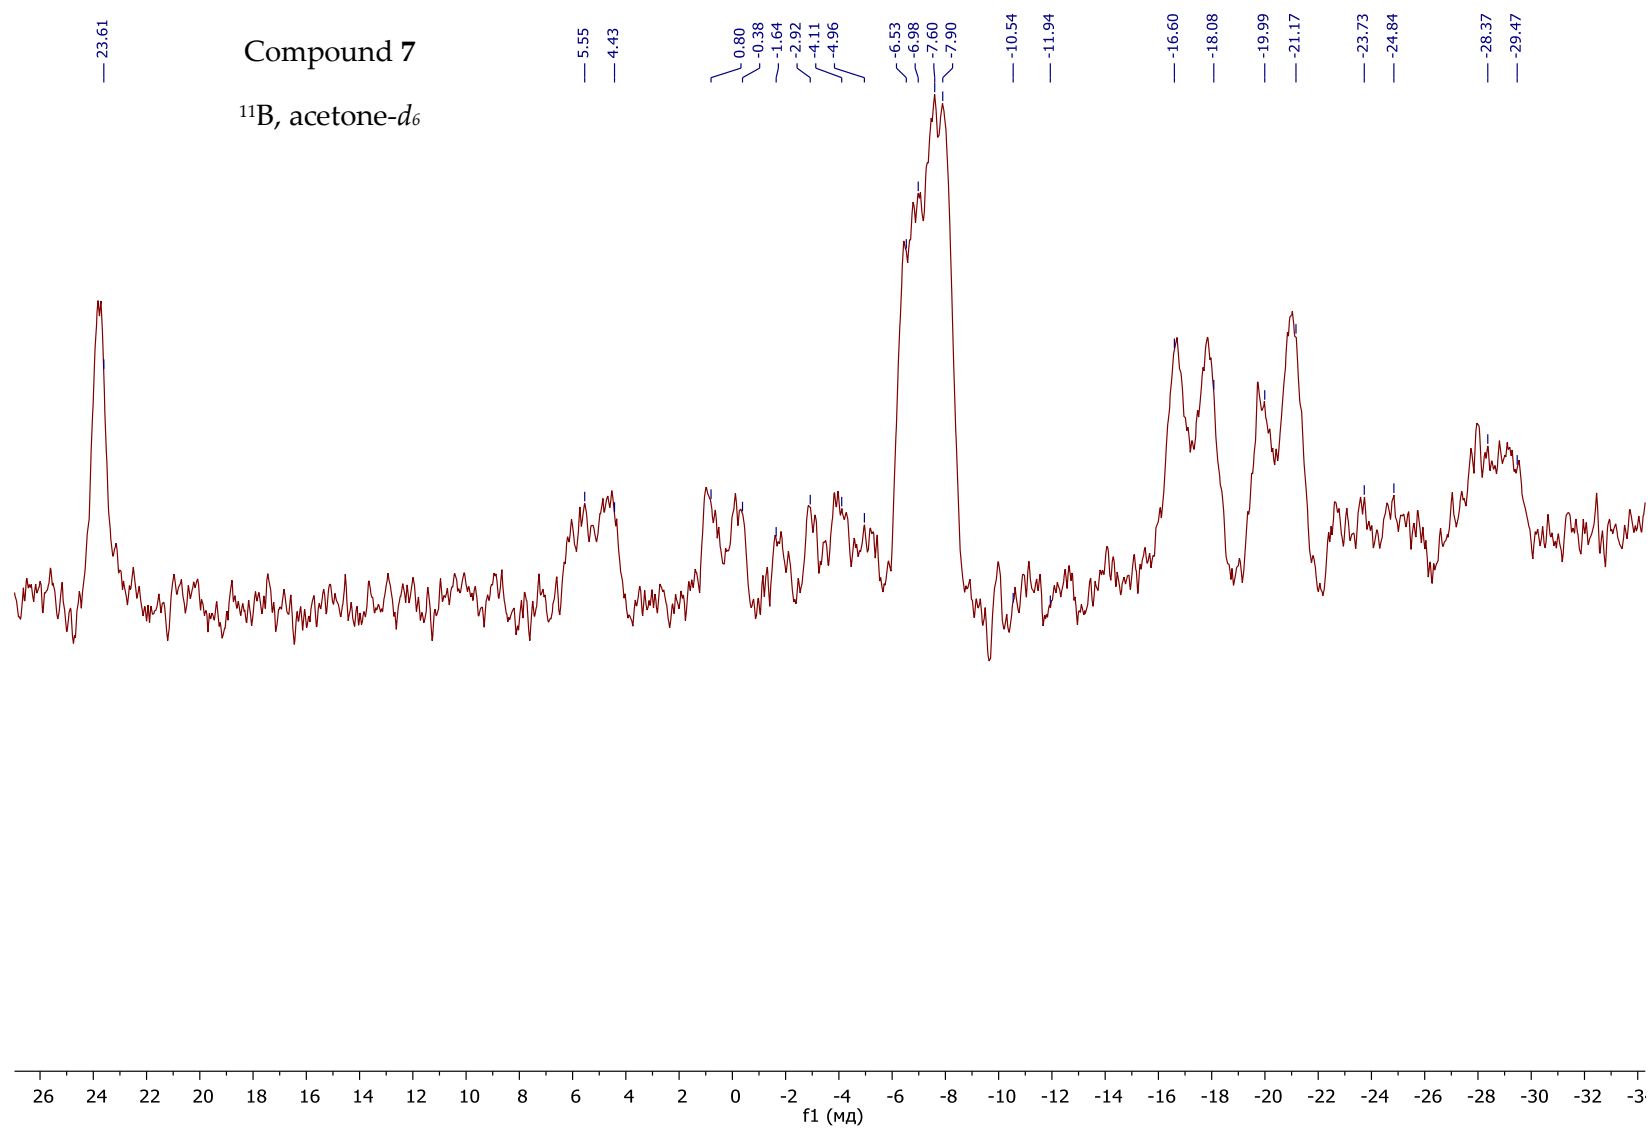

Figure S18.  $^{11}\text{B}$  NMR spectrum of compound 7



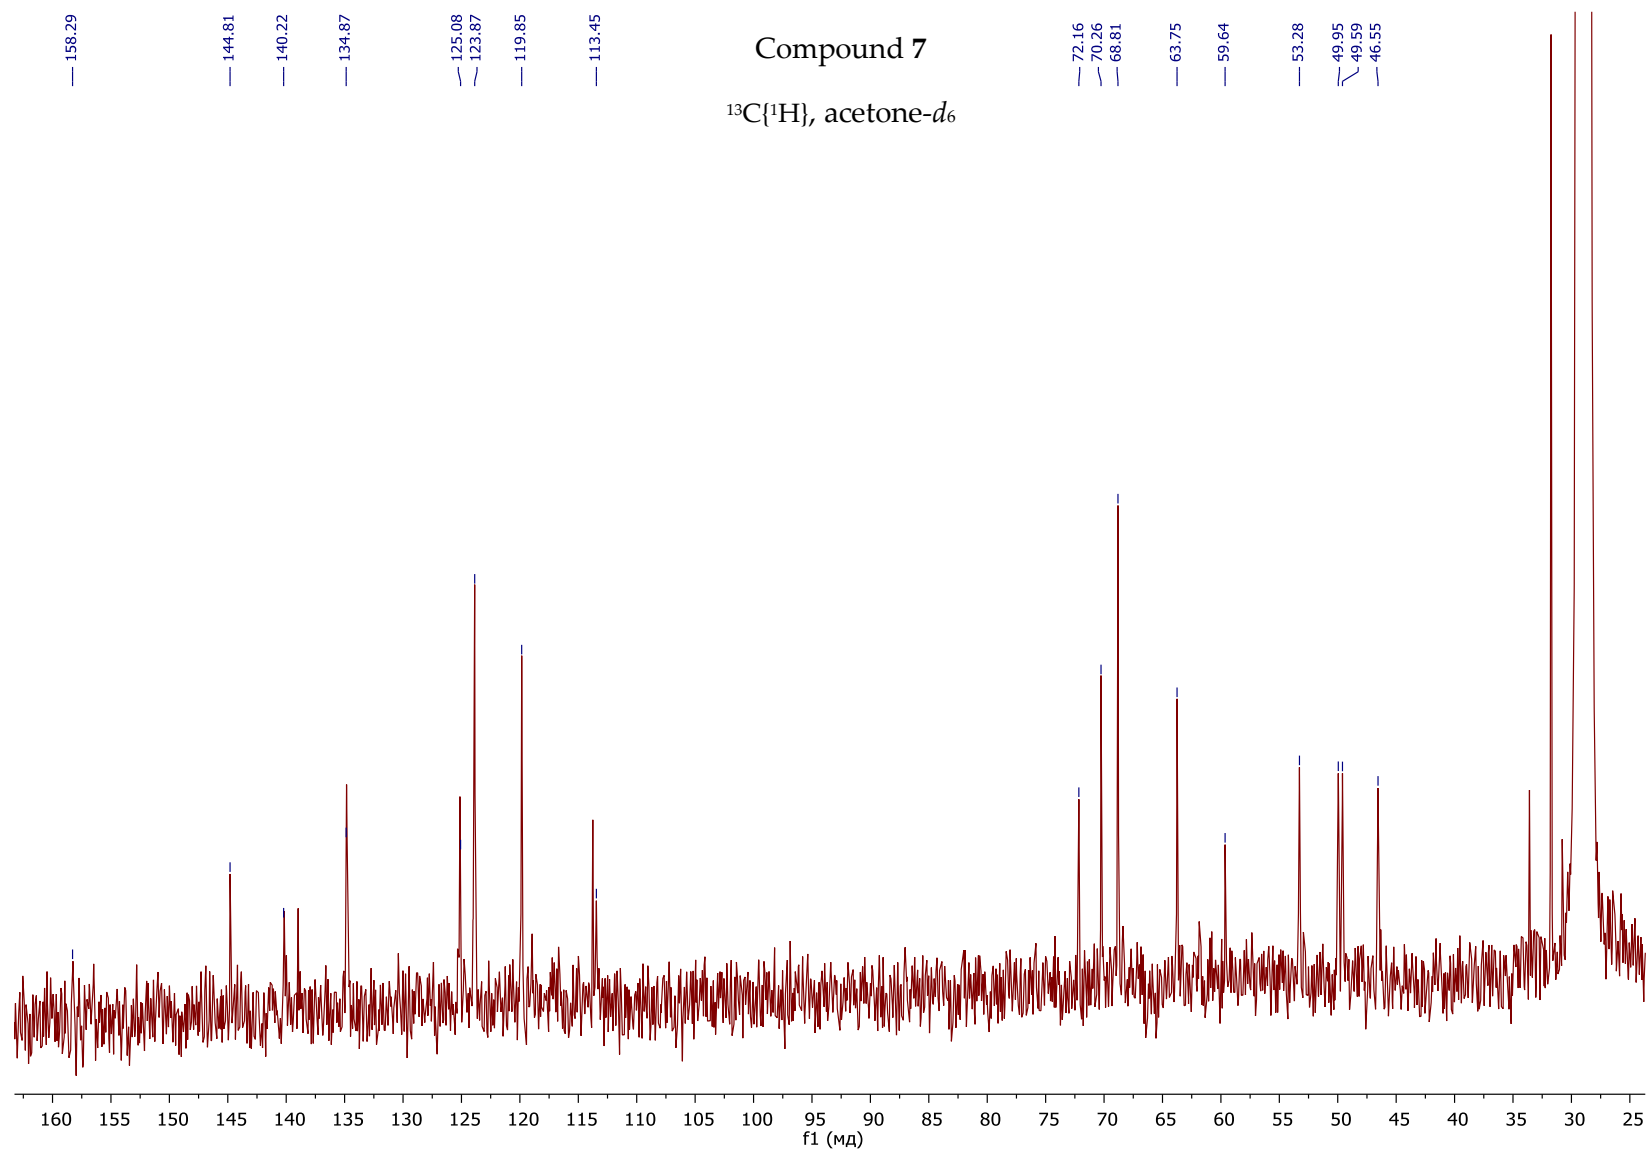

Figure S19.  $^{13}\text{C}\{^1\text{H}\}$  NMR spectrum of compound 7

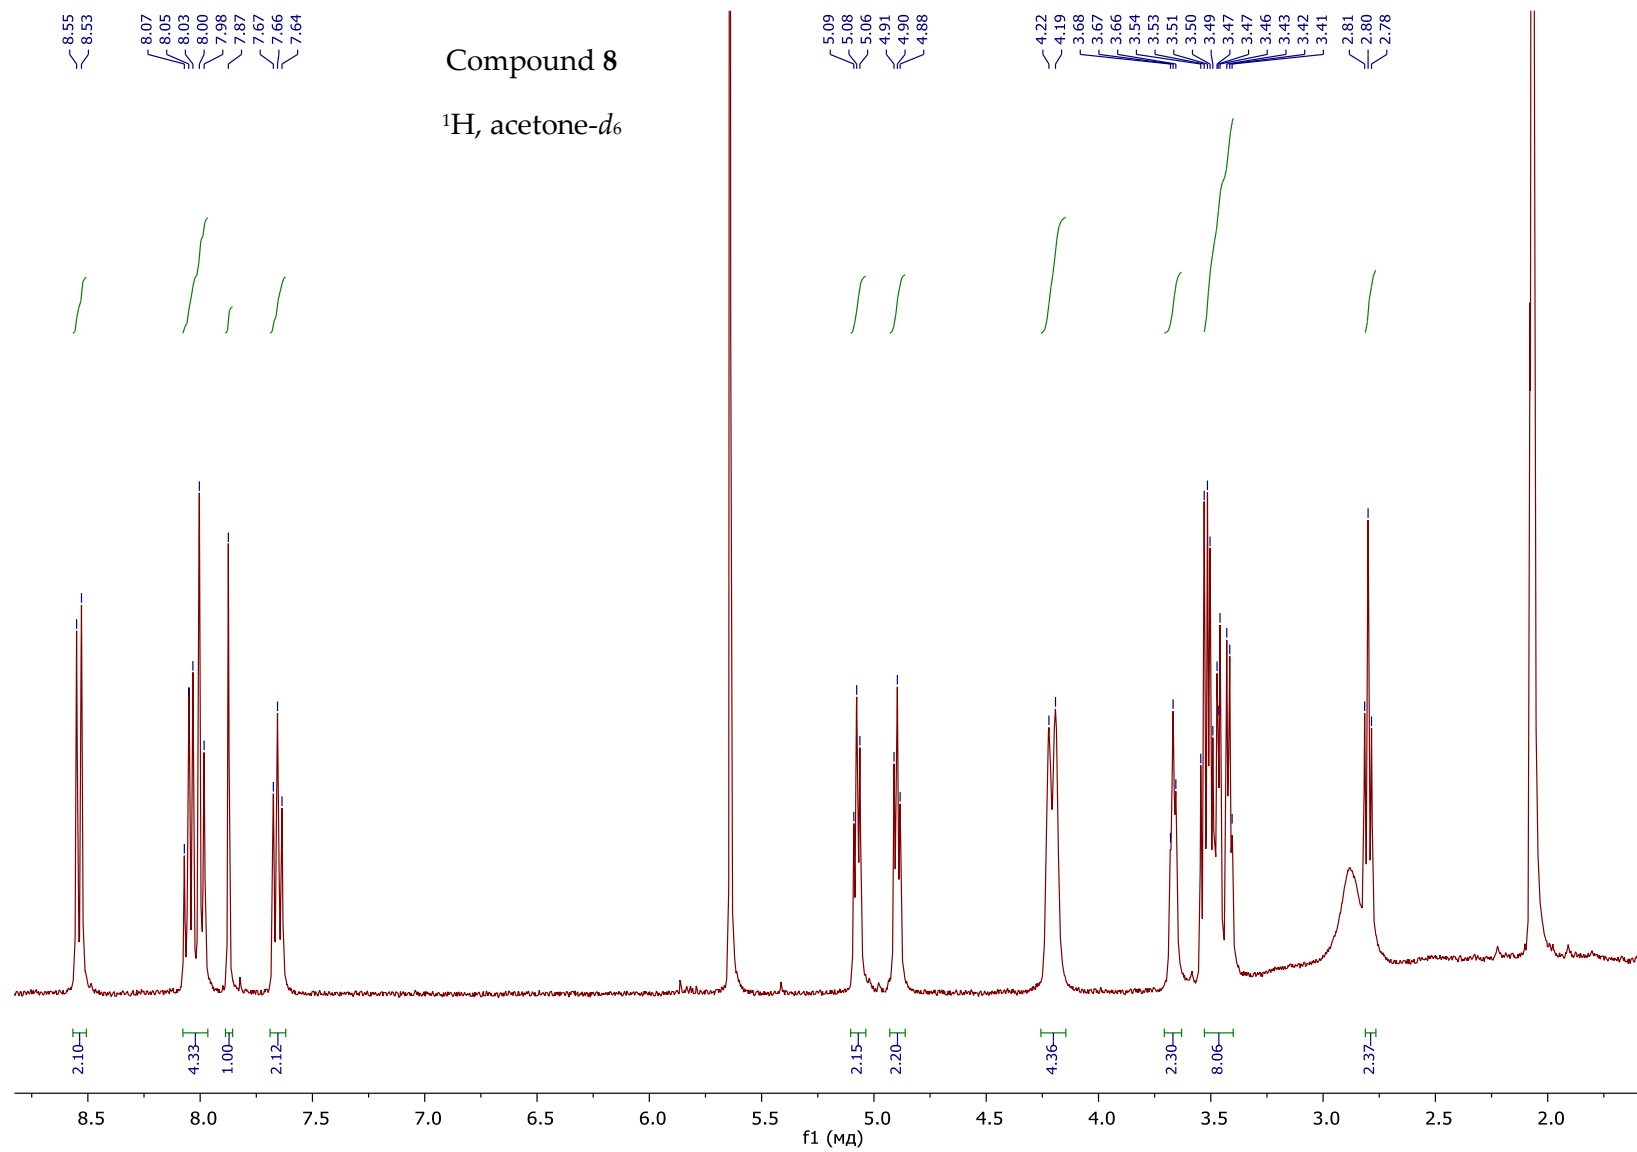

Figure S20.  $^1\text{H}$  NMR spectrum of compound 8

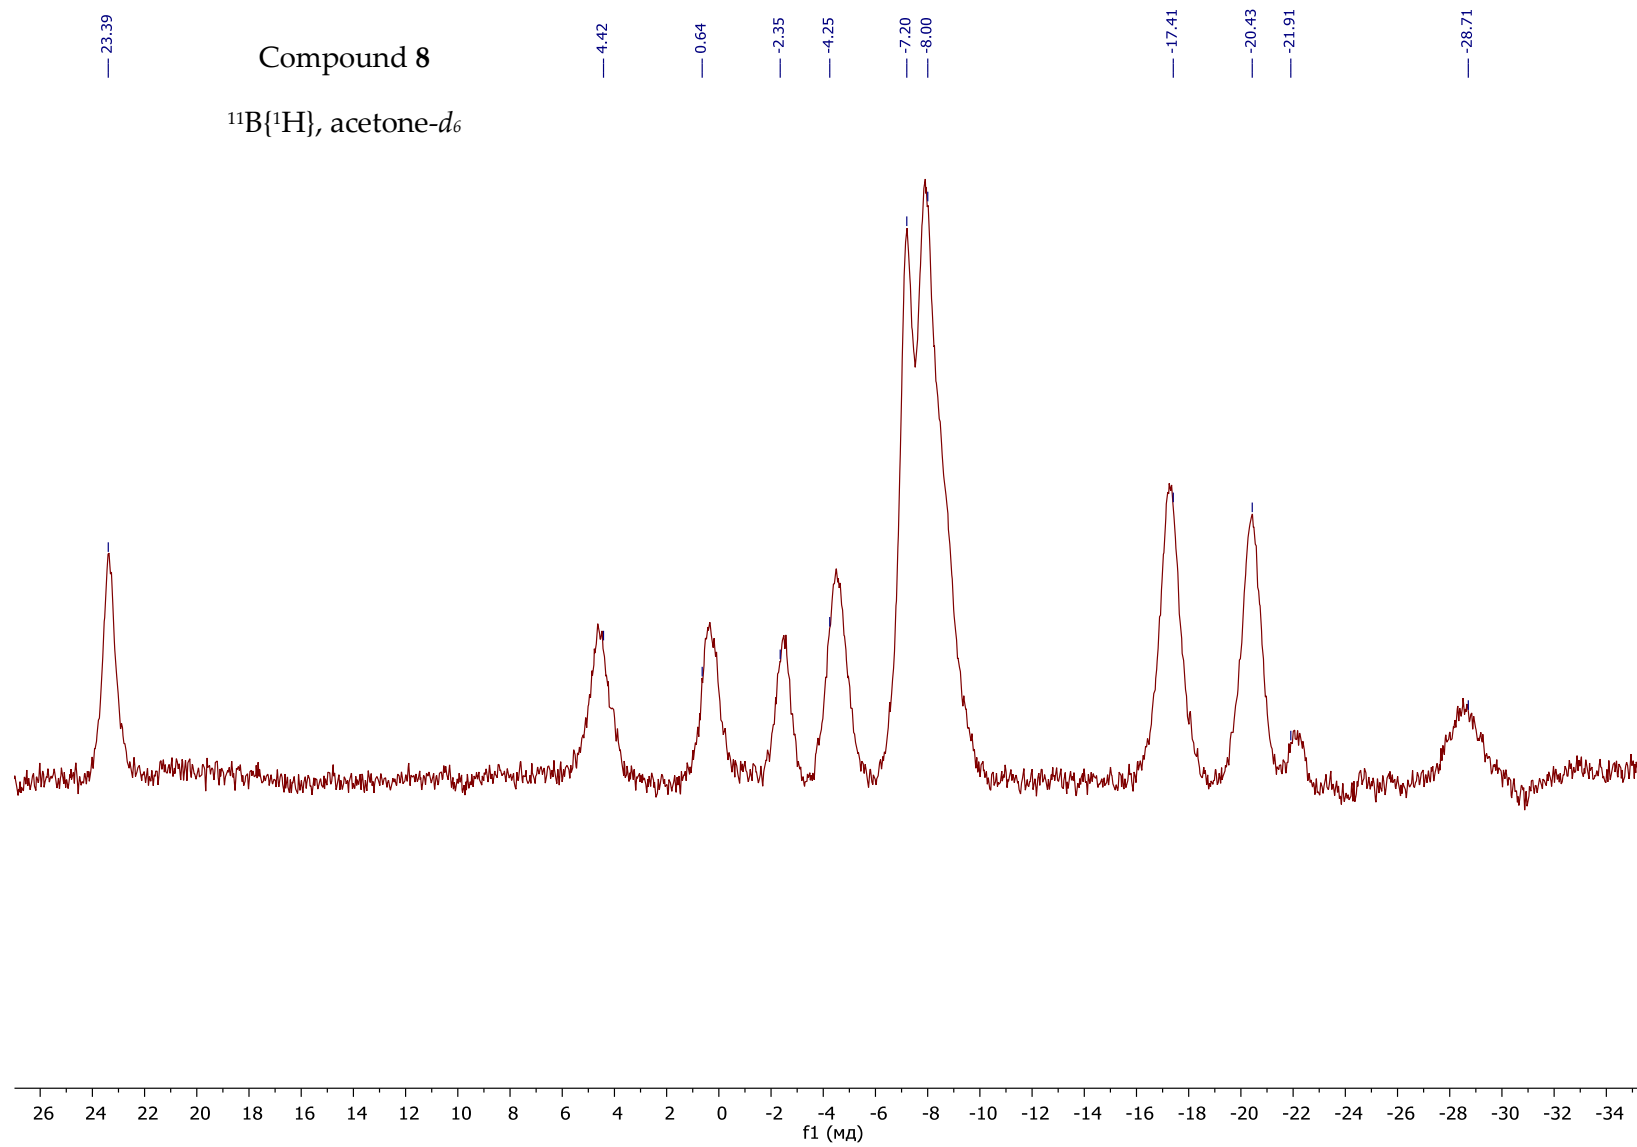

**Figure S21.**  $^{11}\text{B}\{^1\text{H}\}$  NMR spectrum of compound 8

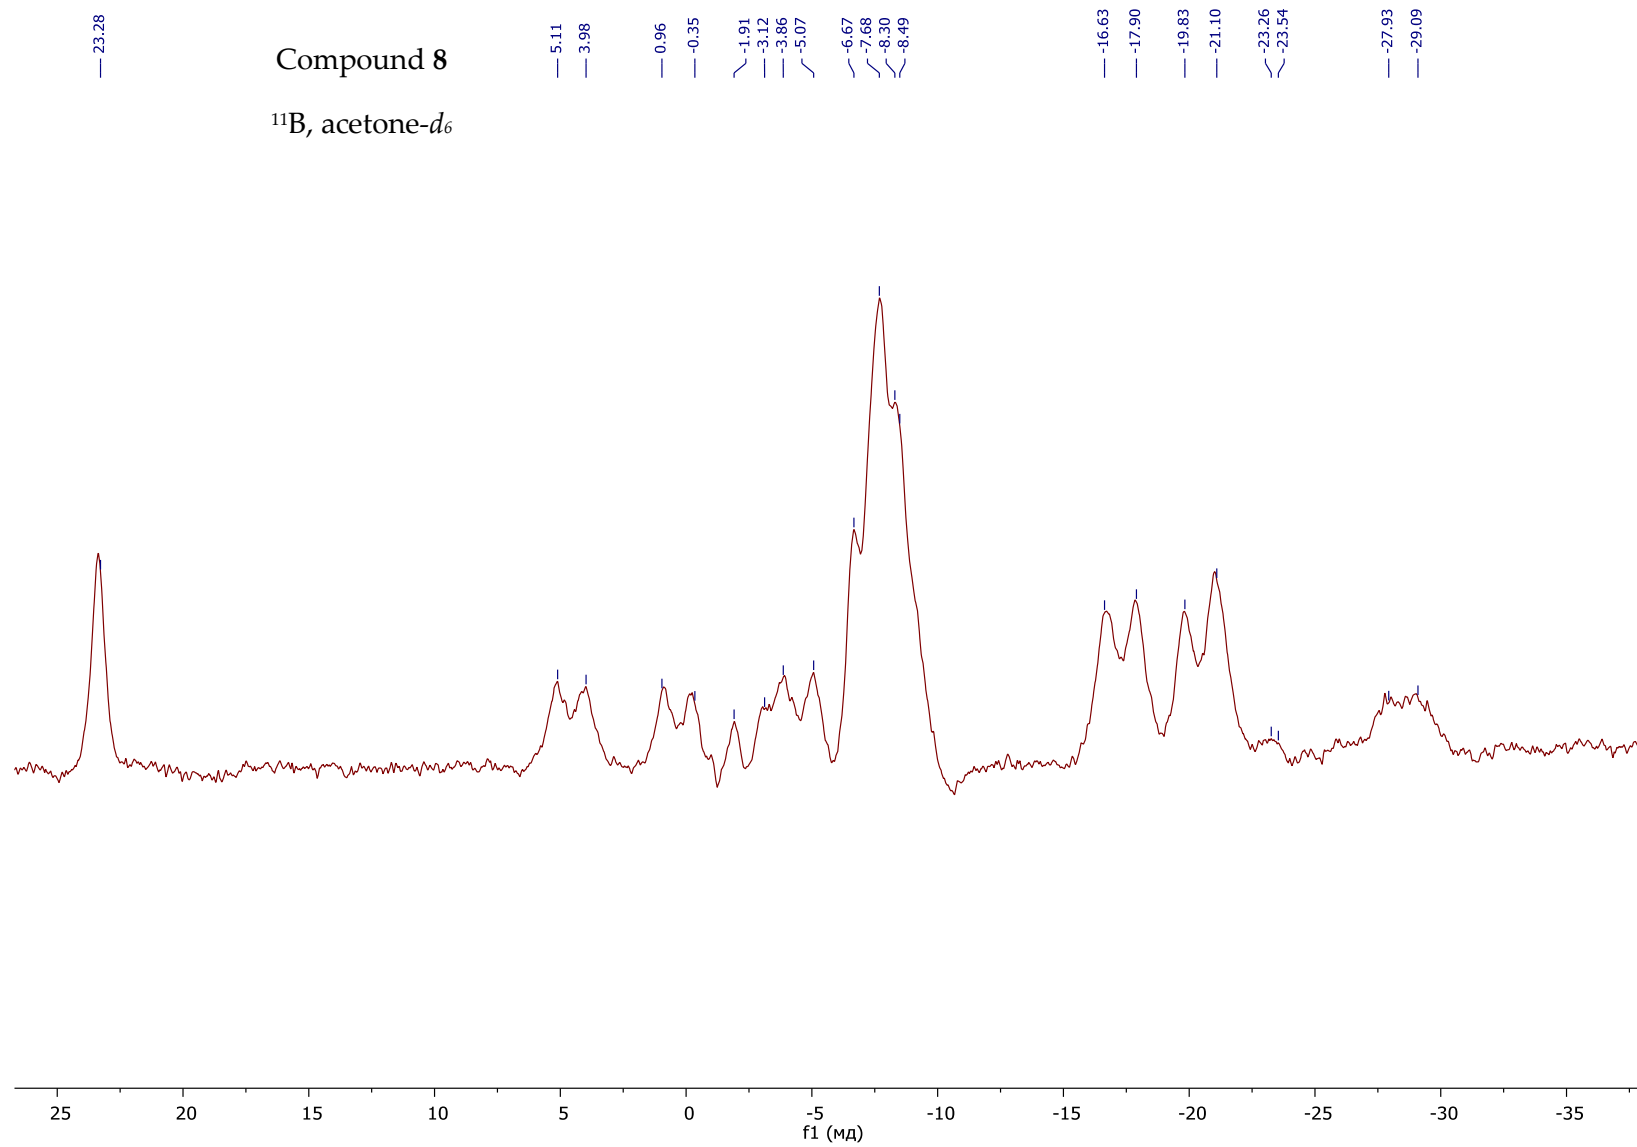

Figure S22.  $^{11}\text{B}$  NMR spectrum of compound 8

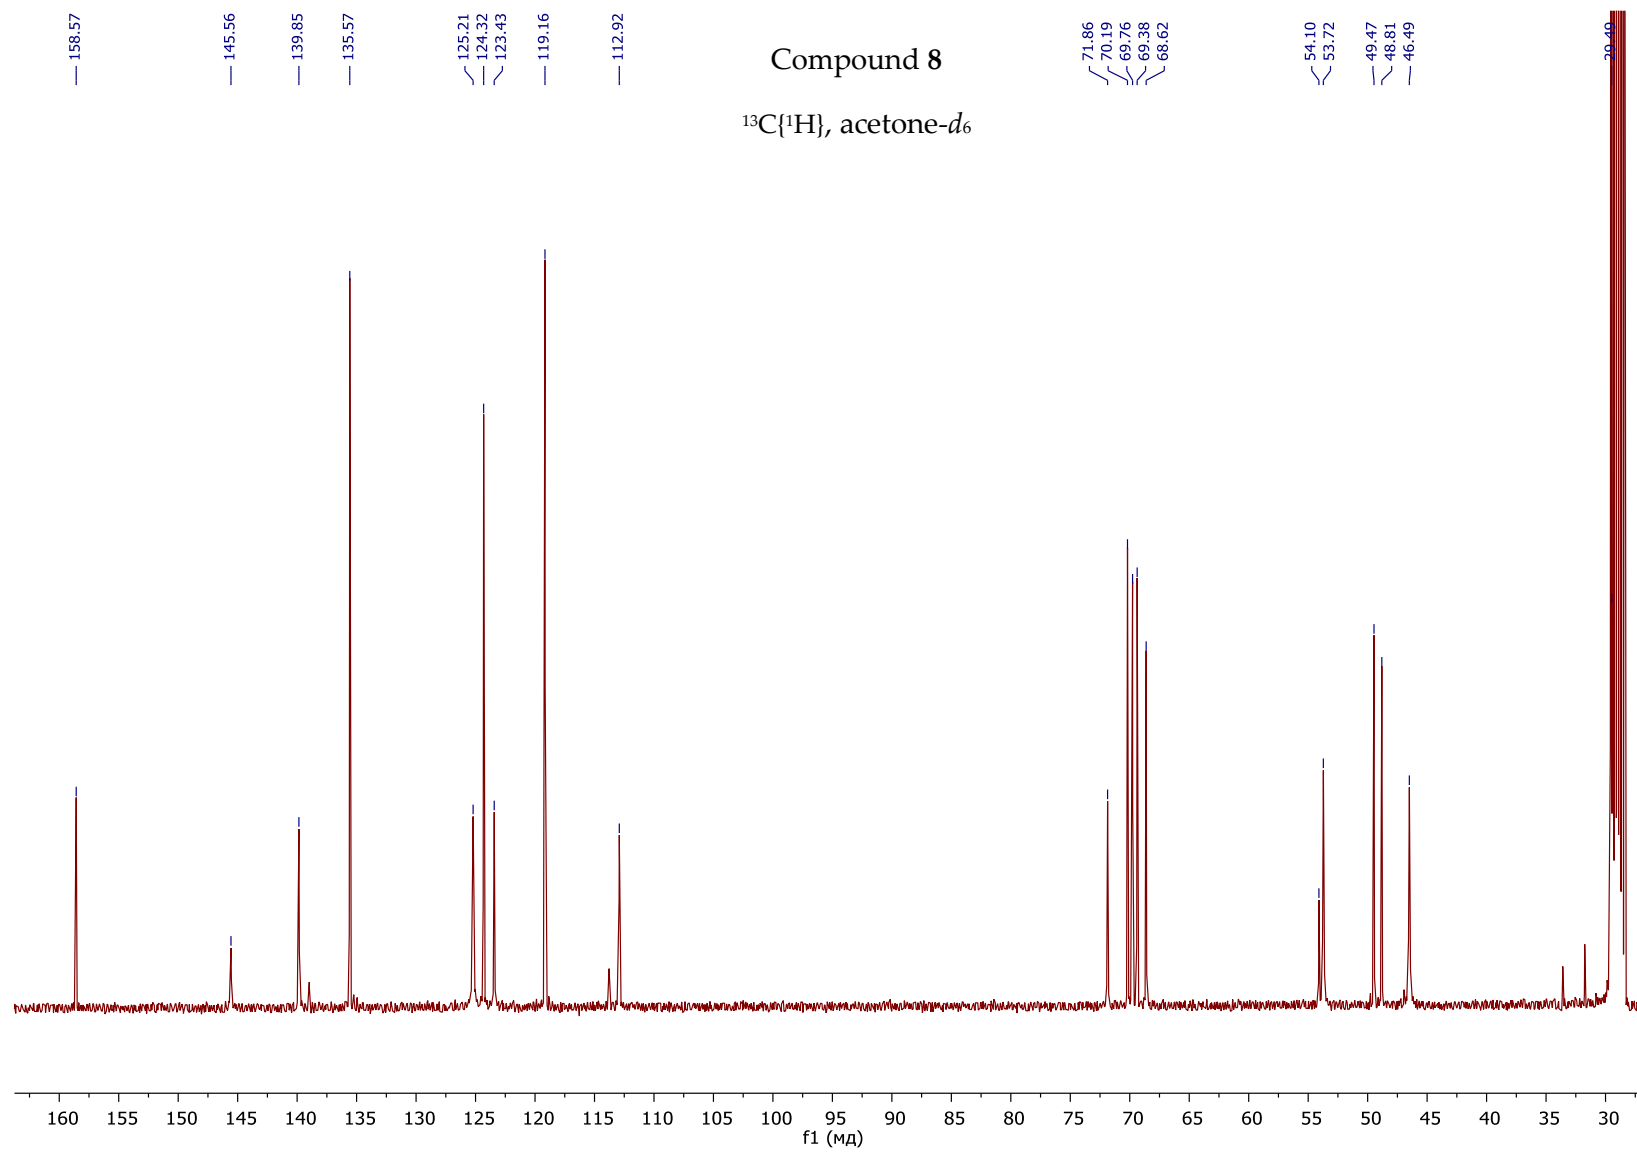

**Figure S23.**  $^{13}\text{C}\{^1\text{H}\}$  NMR spectrum of compound 8

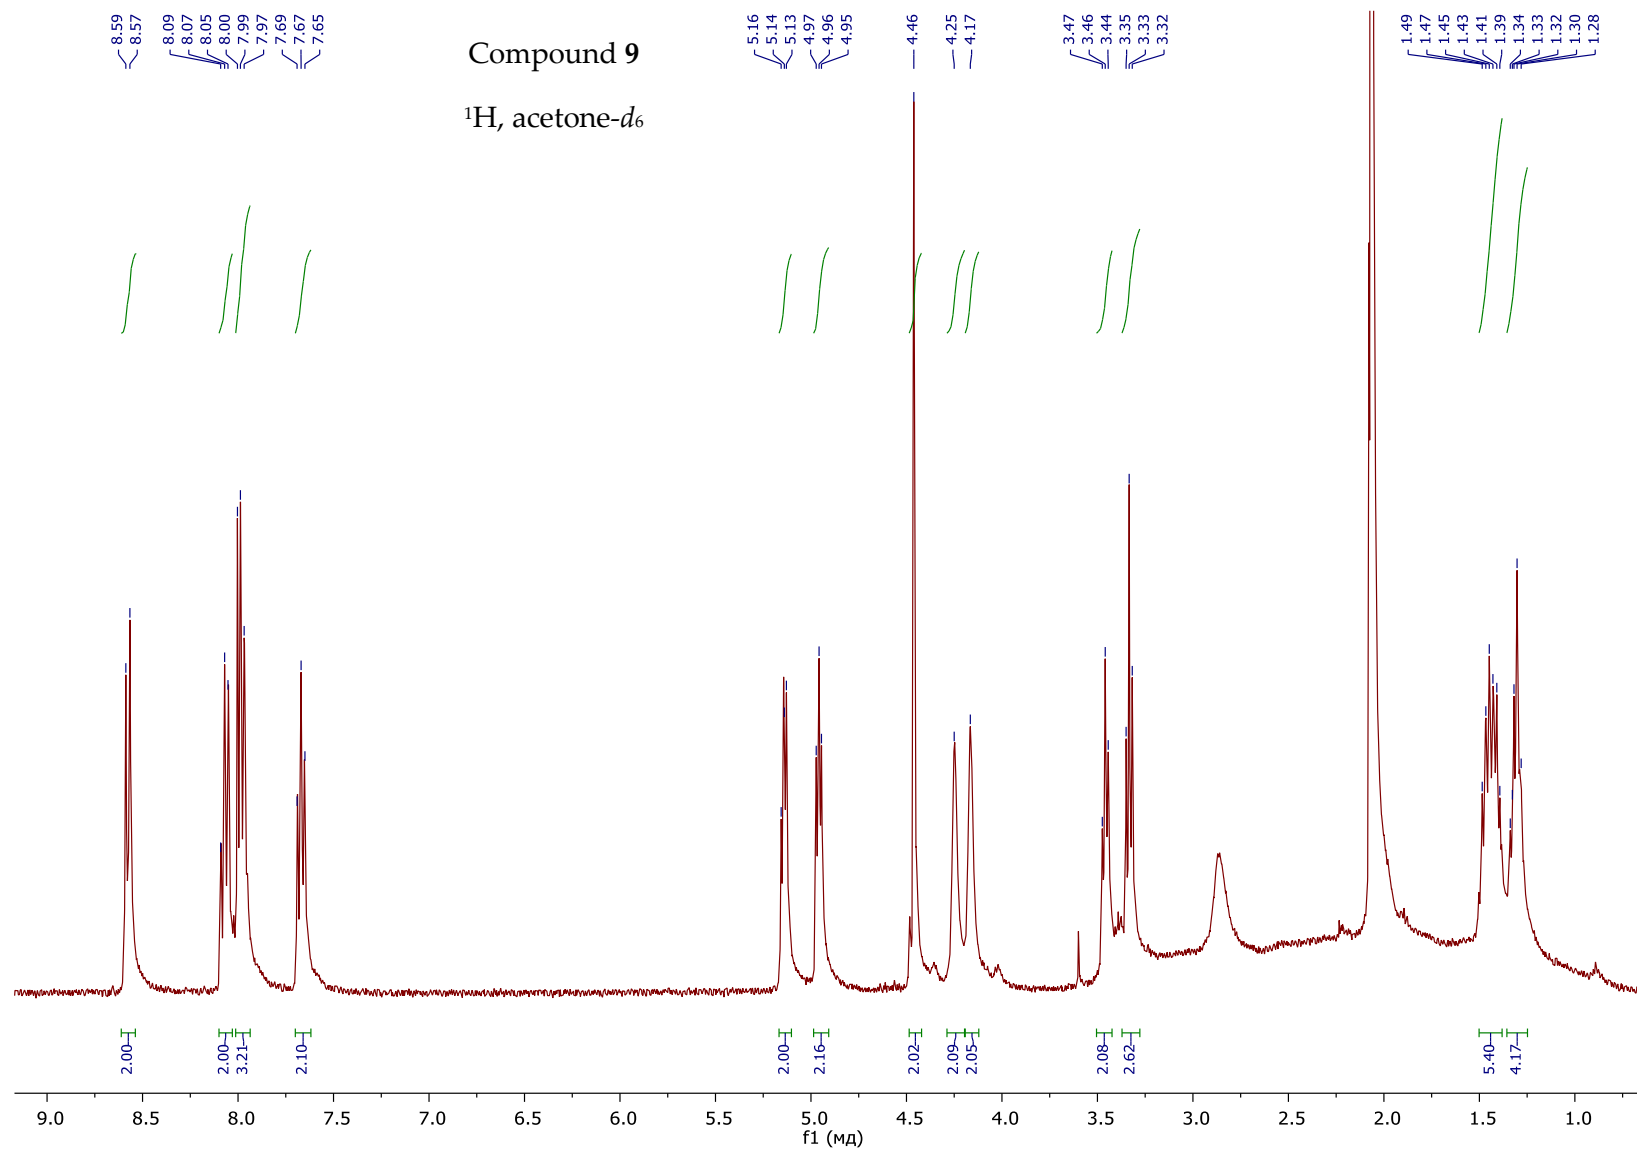

Figure S24.  $^1\text{H}$  NMR spectrum of compound 9

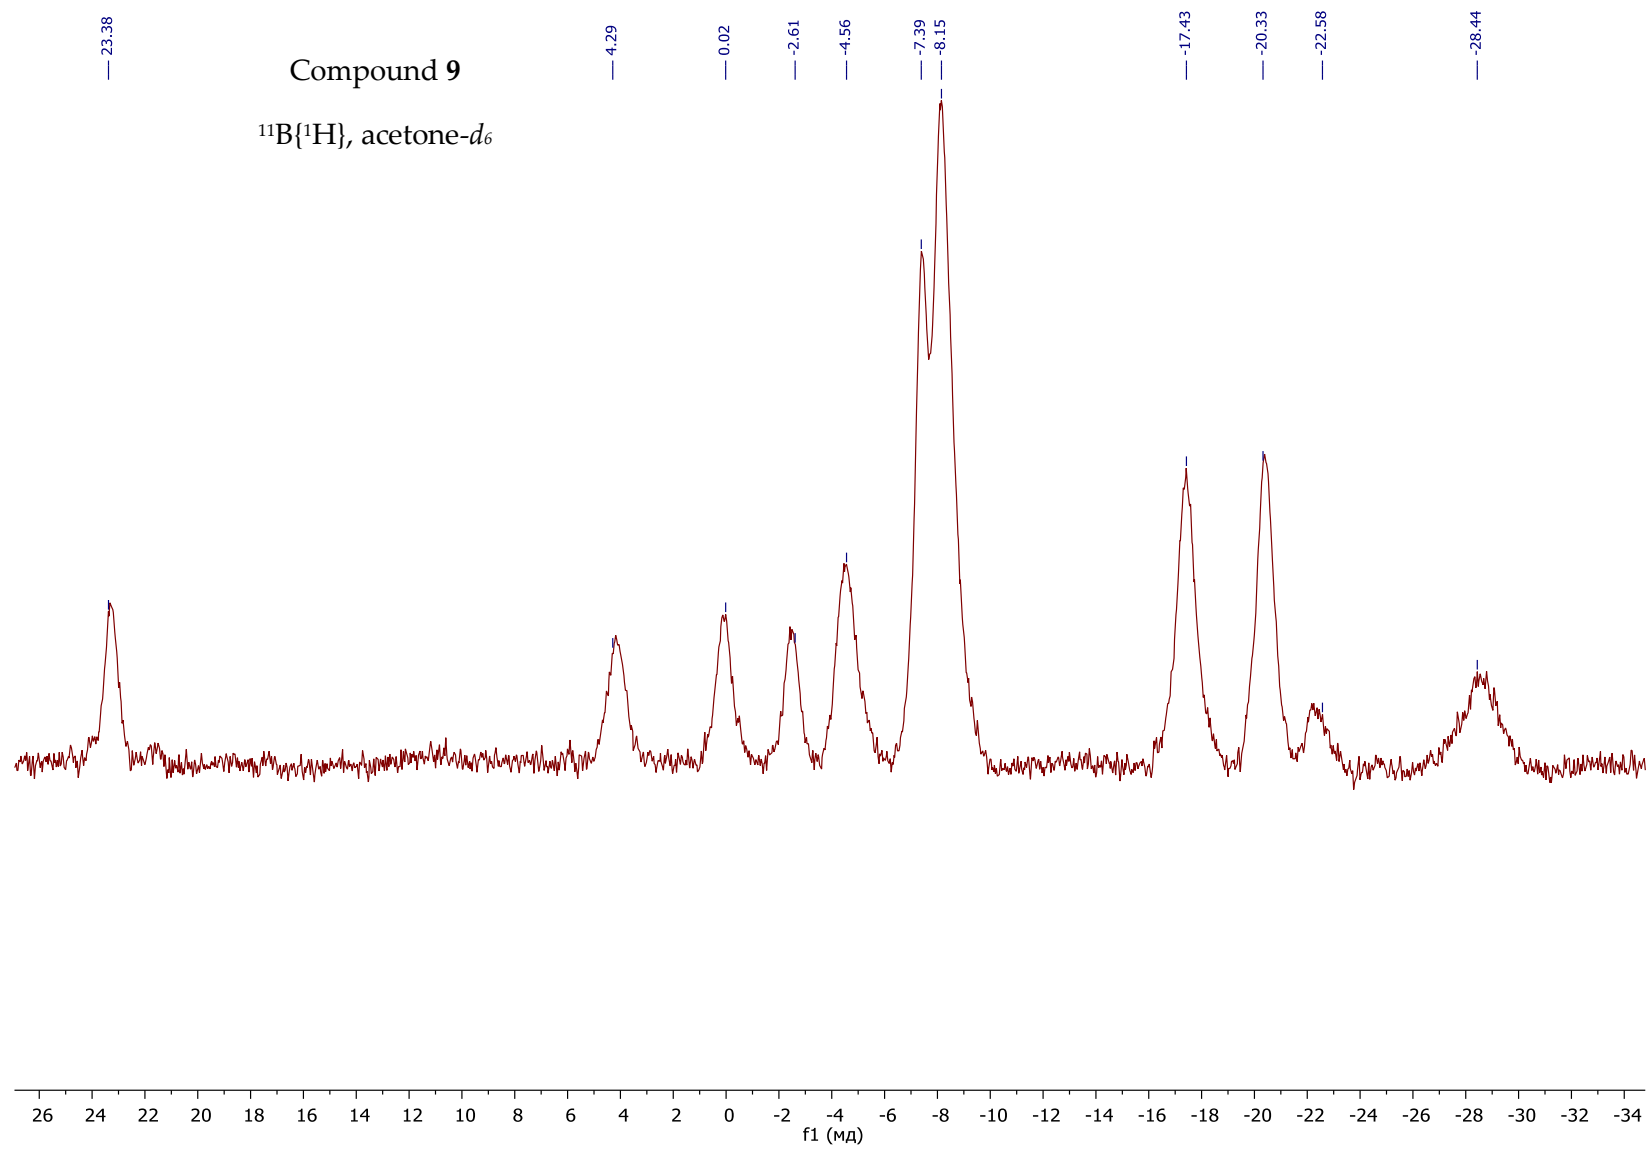

**Figure S25.**  $^{11}\text{B}\{^1\text{H}\}$  NMR spectrum of compound **9**

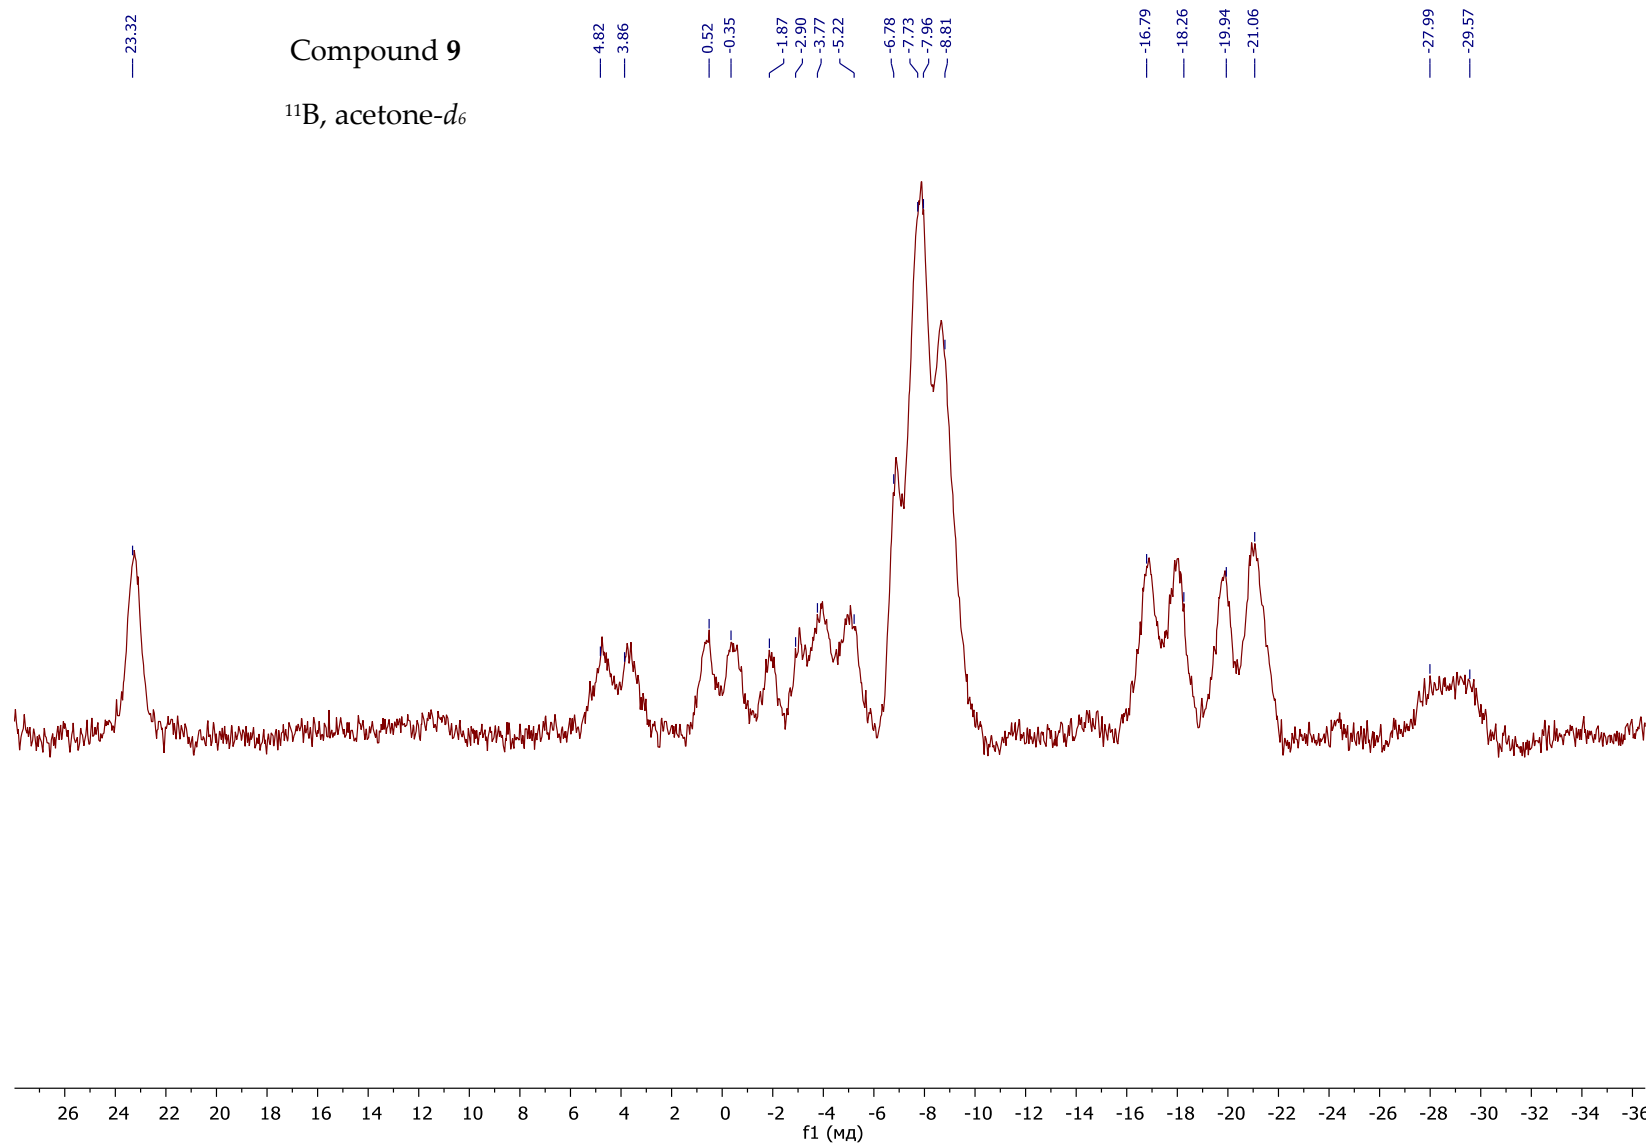

Figure S26.  $^{11}\text{B}$  NMR spectrum of compound **9**



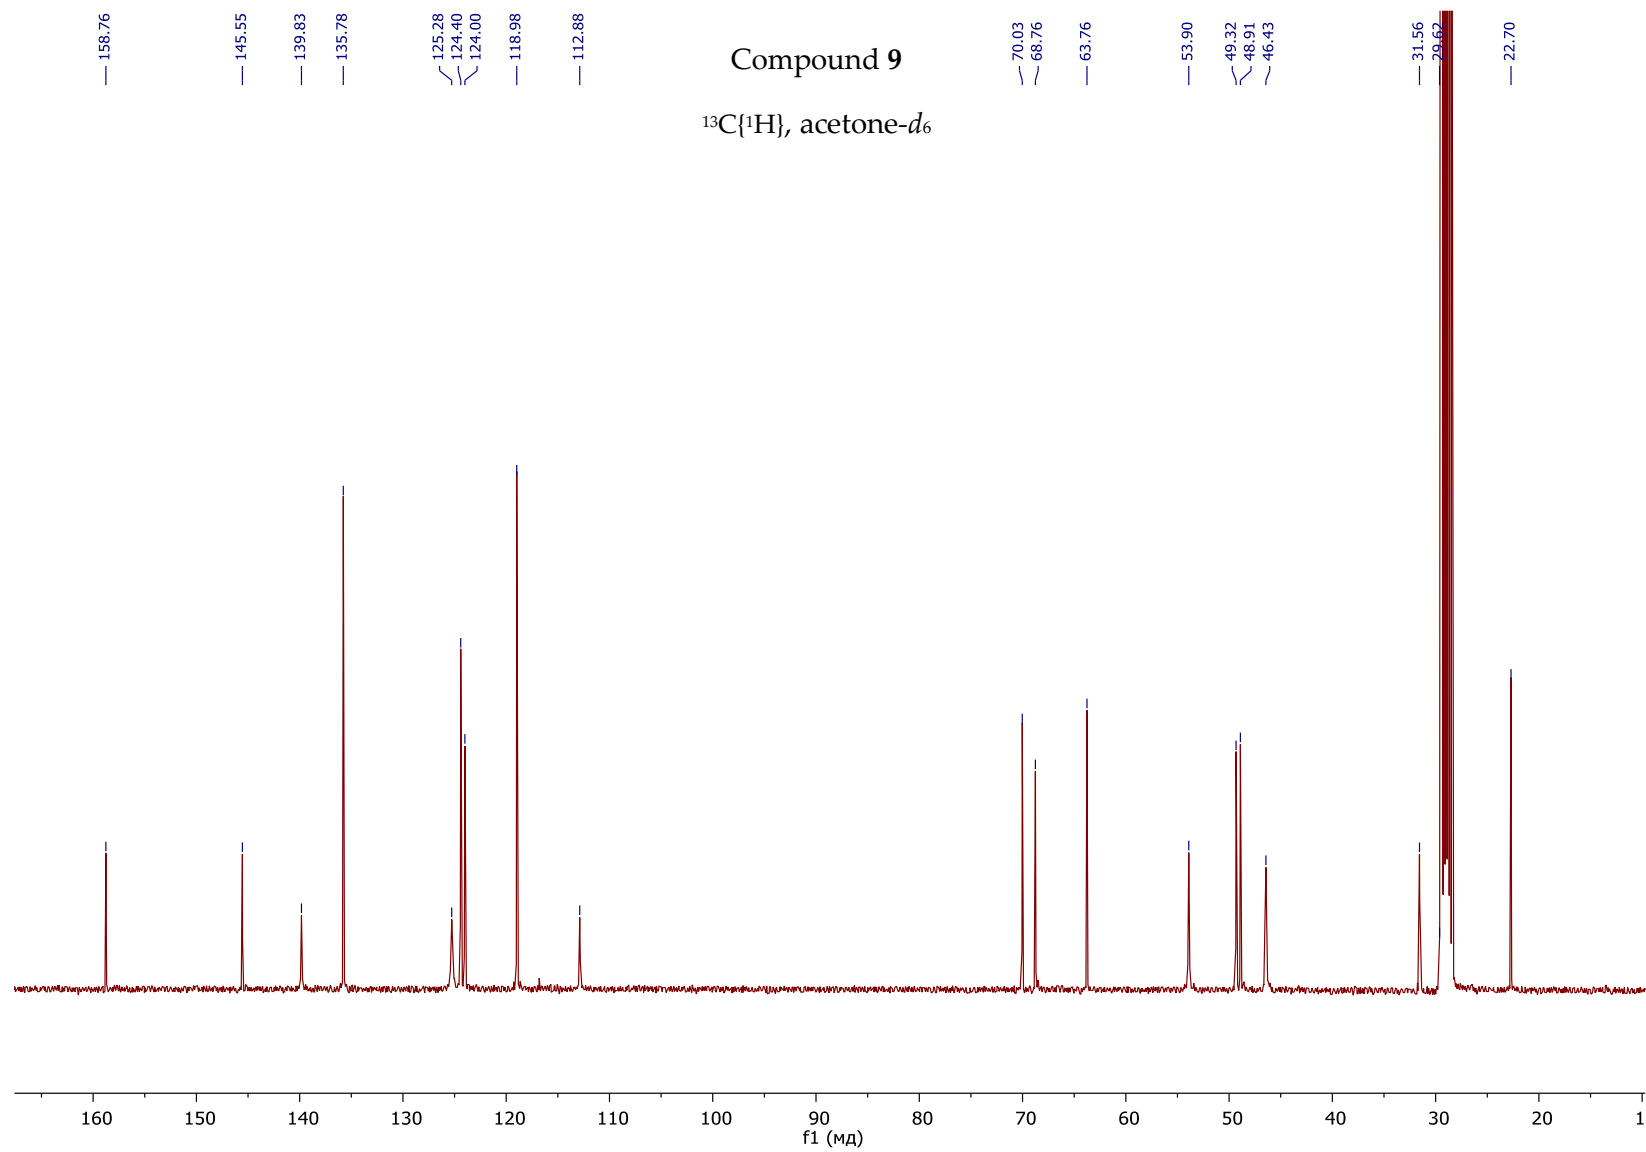

**Figure S27.**  $^{13}\text{C}\{^1\text{H}\}$  NMR spectrum of compound **9**

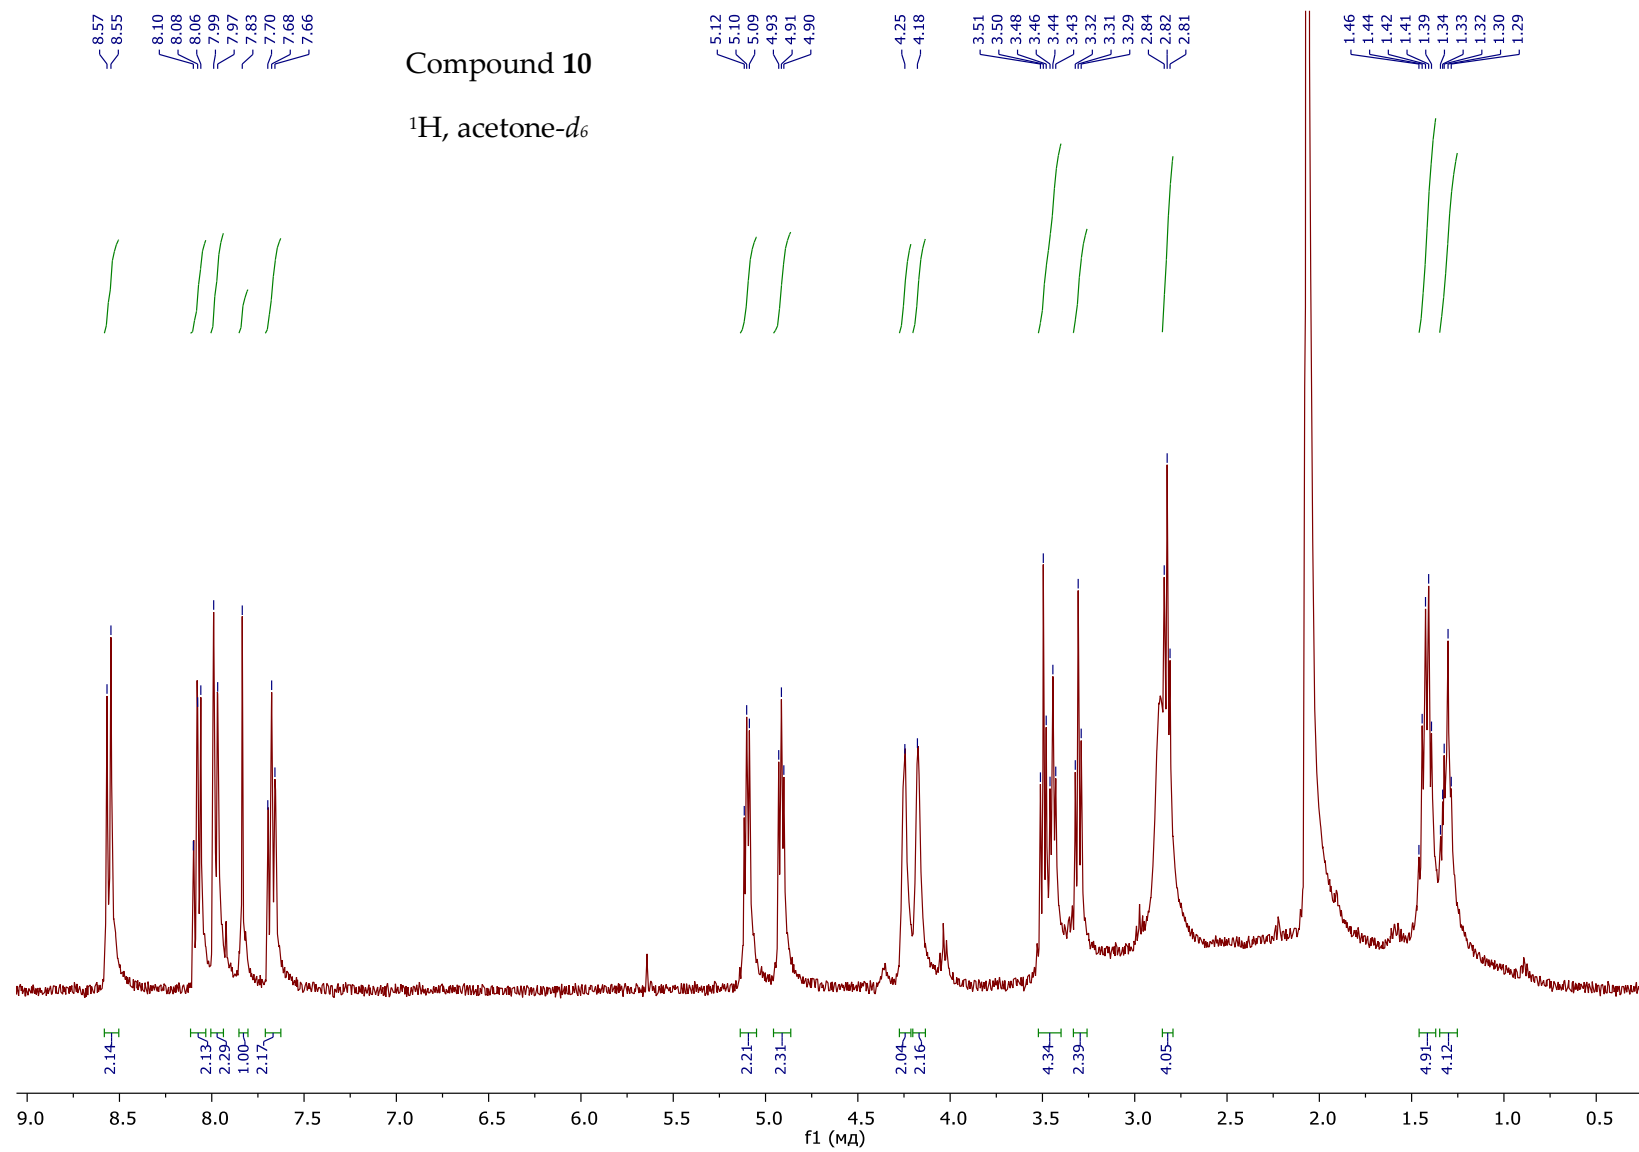

Figure S28.  $^1\text{H}$  NMR spectrum of compound **10**

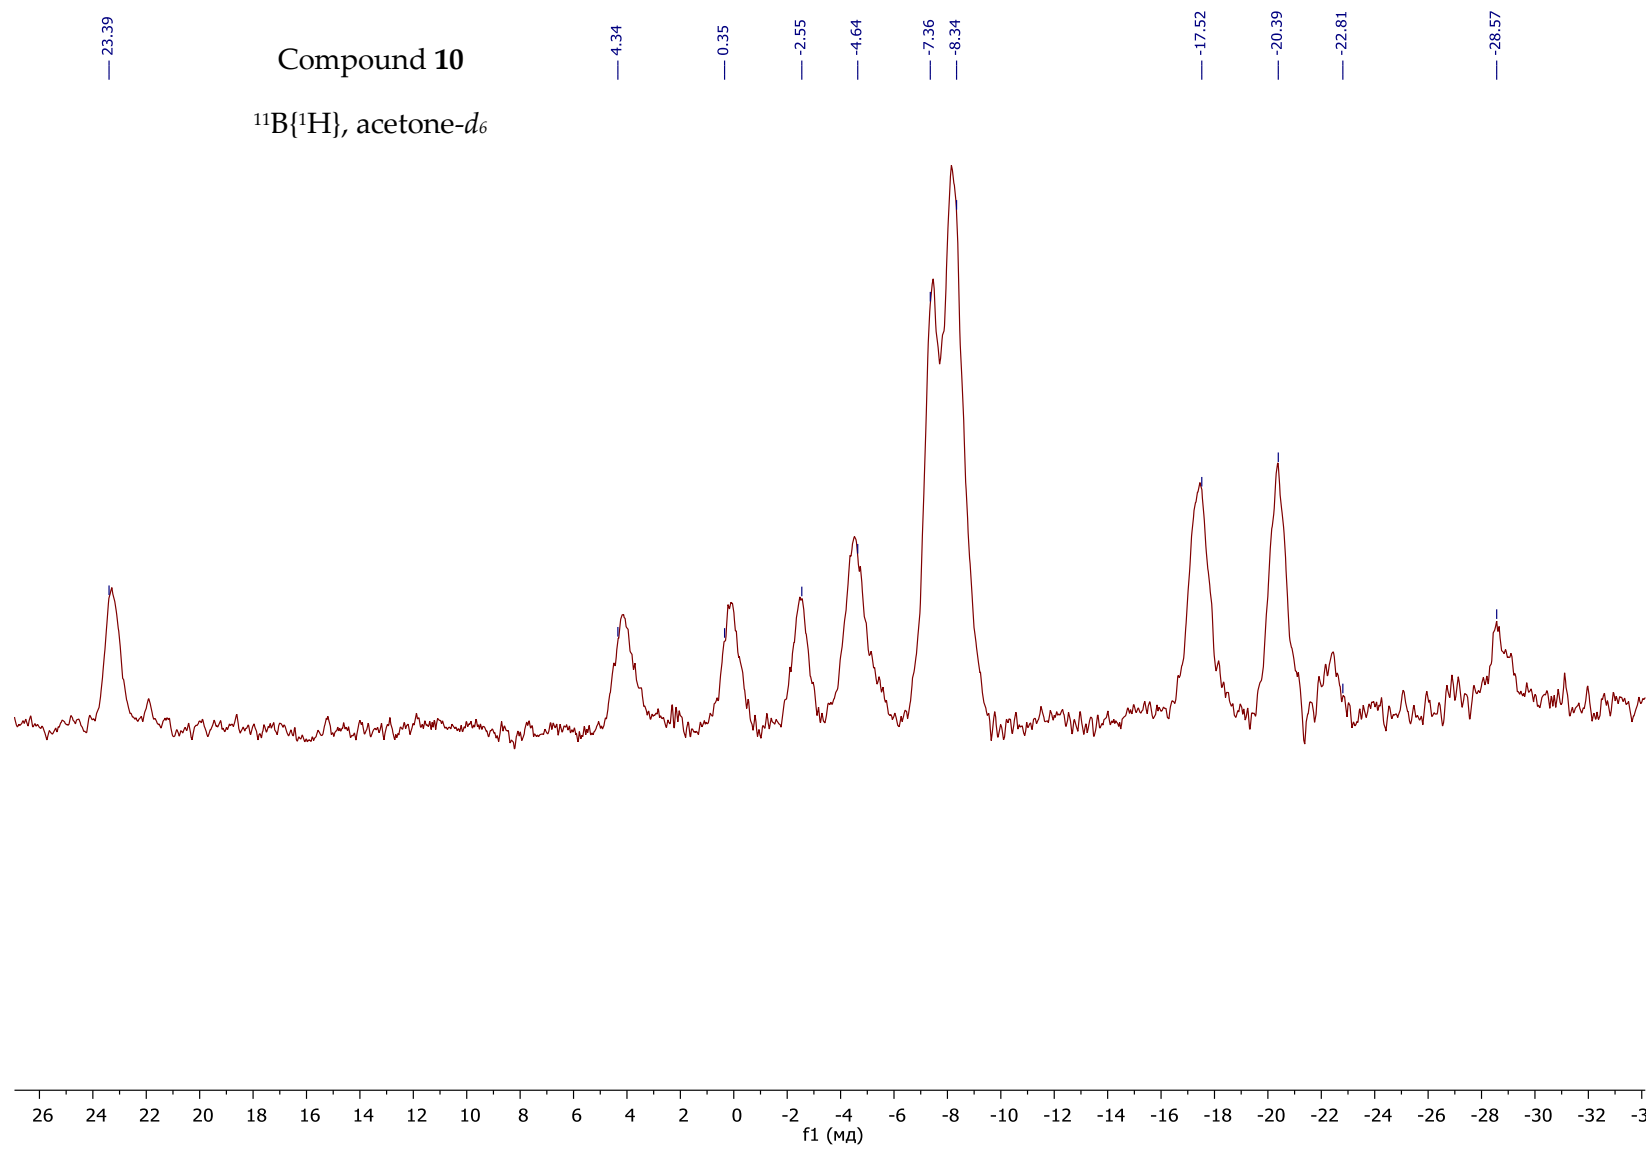

Figure S29.  $^{11}\text{B}\{^1\text{H}\}$  NMR spectrum of compound **10**

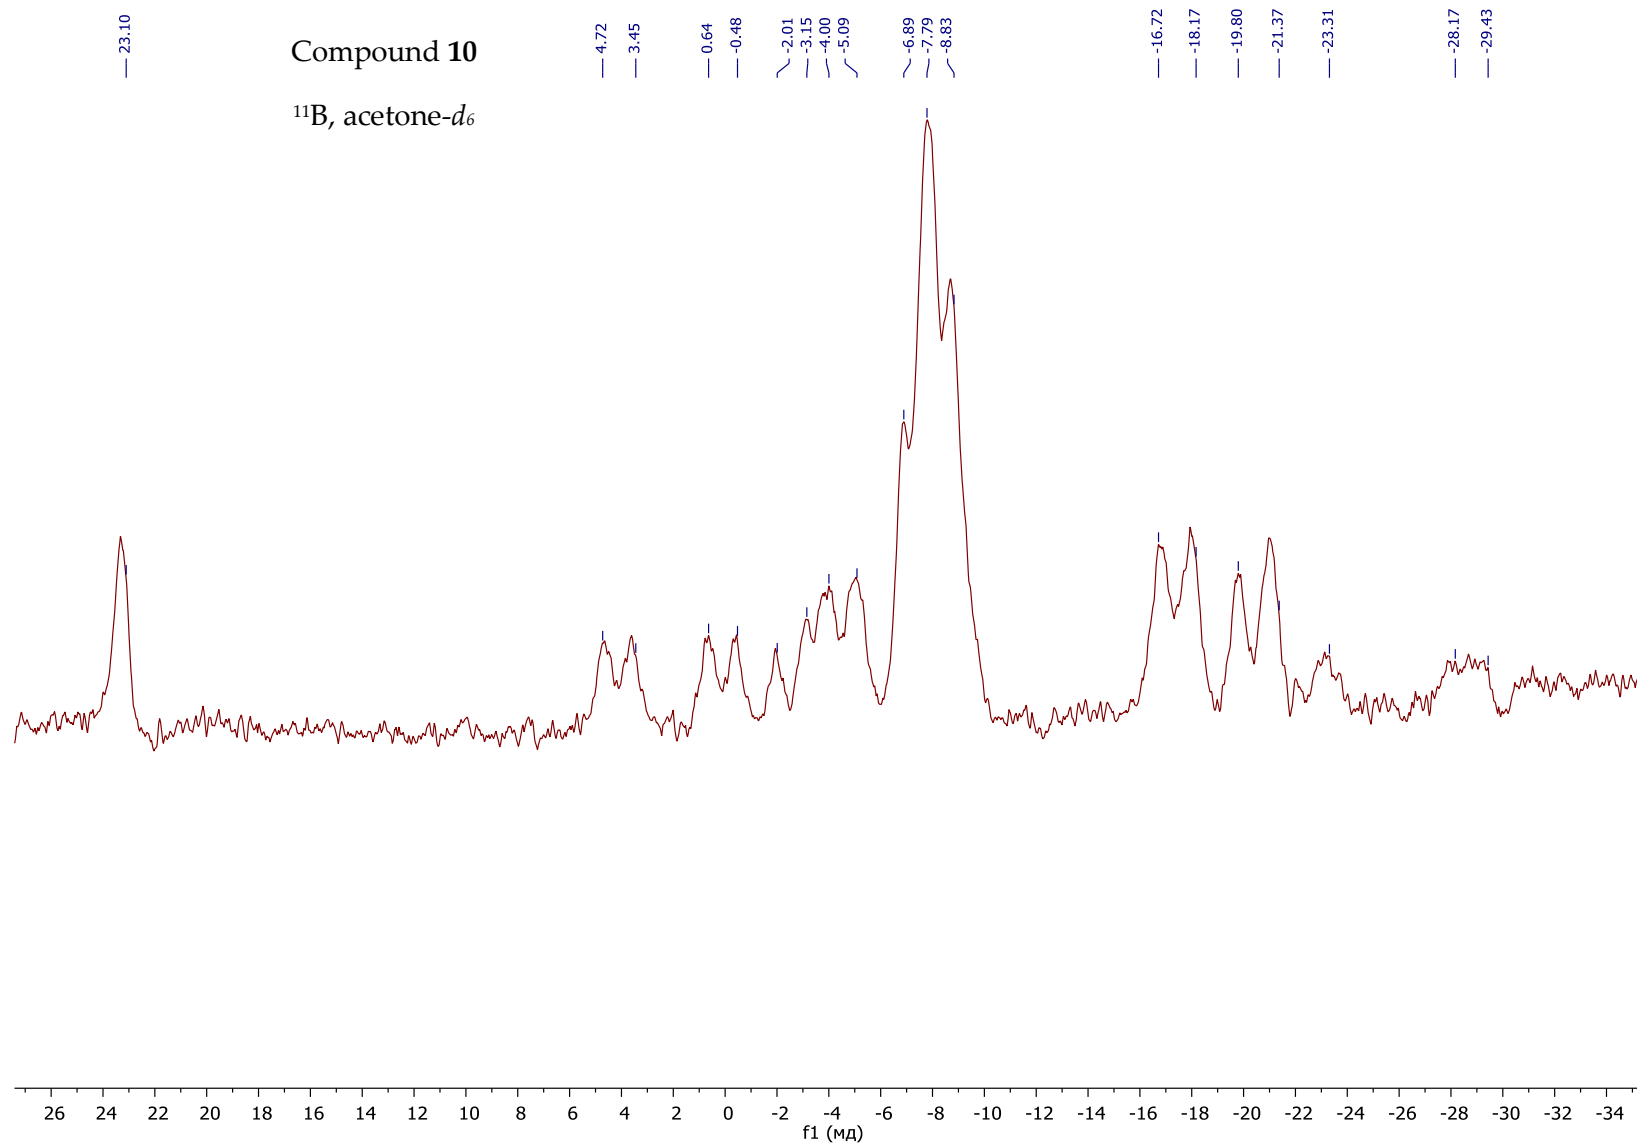

**Figure S30.**  $^{11}\text{B}$  NMR spectrum of compound **10**

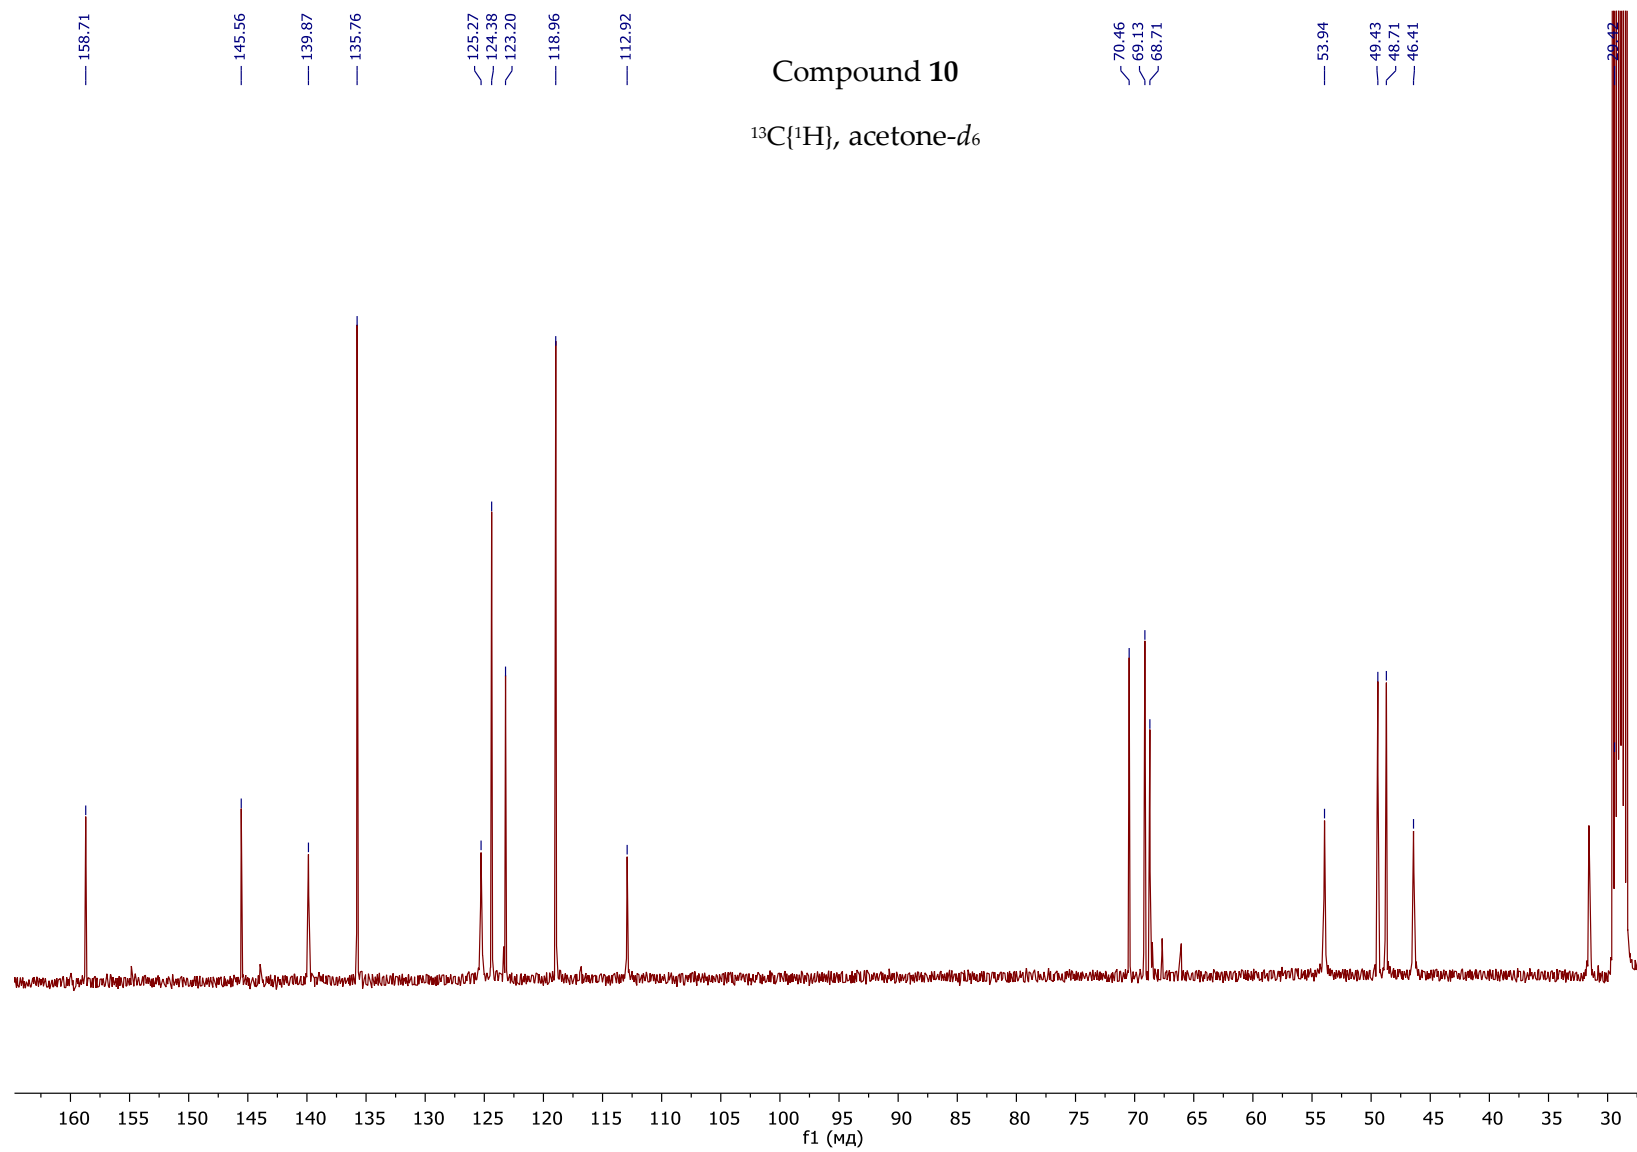

Figure S31.  $^{13}\text{C}\{^1\text{H}\}$  NMR spectrum of compound **10**
