# Supplementary material for: New Boron Containing Acridines: Synthesis and Preliminary Biological Study
Source: Molecules. 2023 Sep 15;28(18):6636. doi: 10.3390/molecules28186636 (PMC10650824; doi:10.3390/molecules28186636)
Supplement: Supplementary file 1 [file molecules-28-06636-s001.zip › Compound 2.cif]

 
data_a
 
_audit_creation_method            'SHELXL-2018/3'
_shelx_SHELXL_version_number      '2018/3'
_chemical_name_systematic         ?
_chemical_name_common             ?
_chemical_melting_point           ?
_chemical_formula_moiety
 'C15 H14 N5, Cl'
_chemical_formula_sum
 'C15 H14 Cl N5' 
_chemical_formula_weight          299.76

loop_
 _atom_type_symbol
 _atom_type_description
 _atom_type_scat_dispersion_real
 _atom_type_scat_dispersion_imag
 _atom_type_scat_source
 'C'  'C'   0.0033   0.0016
 'International Tables Vol C Tables 4.2.6.8 and 6.1.1.4'
 'H'  'H'   0.0000   0.0000
 'International Tables Vol C Tables 4.2.6.8 and 6.1.1.4'
 'N'  'N'   0.0061   0.0033
 'International Tables Vol C Tables 4.2.6.8 and 6.1.1.4'
 'Cl'  'Cl'   0.1484   0.1585
 'International Tables Vol C Tables 4.2.6.8 and 6.1.1.4'
 
_space_group_crystal_system       orthorhombic
_space_group_IT_number            19
_space_group_name_H-M_alt         'P 21 21 21'
_space_group_name_Hall            'P 2ac 2ab'
 
_shelx_space_group_comment
;
The symmetry employed for this shelxl refinement is uniquely defined
by the following loop, which should always be used as a source of
symmetry information in preference to the above space-group names.
They are only intended as comments.
;
 
loop_
 _space_group_symop_operation_xyz
 'x, y, z'
 '-x+1/2, -y, z+1/2'
 '-x, y+1/2, -z+1/2'
 'x+1/2, -y+1/2, -z'
 
_cell_length_a                    7.0854(3)
_cell_length_b                    11.0430(4)
_cell_length_c                    17.4107(7)
_cell_angle_alpha                 90
_cell_angle_beta                  90
_cell_angle_gamma                 90
_cell_volume                      1362.28(9)
_cell_formula_units_Z             4
_cell_measurement_temperature     140(2)
_cell_measurement_reflns_used     393
_cell_measurement_theta_min       3
_cell_measurement_theta_max       25
 
_exptl_crystal_description        plate
_exptl_crystal_colour             colorless
_exptl_crystal_density_meas       ?
_exptl_crystal_density_method     ?
_exptl_crystal_density_diffrn     1.462          
_exptl_crystal_F_000              624
_exptl_transmission_factor_min    ?
_exptl_transmission_factor_max    ?
_exptl_crystal_size_max           0.211
_exptl_crystal_size_mid           0.143
_exptl_crystal_size_min           0.022
_exptl_absorpt_coefficient_mu     0.281
_shelx_estimated_absorpt_T_min    0.943
_shelx_estimated_absorpt_T_max    0.994
_exptl_absorpt_correction_type    multi-scan
_exptl_absorpt_correction_T_min   0.921
_exptl_absorpt_correction_T_max   0.995
_exptl_absorpt_process_details    'SADABS'
_exptl_absorpt_special_details    ?
_diffrn_ambient_temperature       140(2)
_diffrn_radiation_wavelength      0.71073
_diffrn_radiation_type            MoK\a
_diffrn_source                    ?
_diffrn_measurement_device_type   'Bruker APEX II CCD area detector''
_diffrn_measurement_method        'omega scans'
_diffrn_detector_area_resol_mean  ?
_diffrn_reflns_number             14766
_diffrn_reflns_av_unetI/netI      0.0591
_diffrn_reflns_av_R_equivalents   0.0451
_diffrn_reflns_limit_h_min        -9
_diffrn_reflns_limit_h_max        9
_diffrn_reflns_limit_k_min        -15
_diffrn_reflns_limit_k_max        15
_diffrn_reflns_limit_l_min        -24
_diffrn_reflns_limit_l_max        24
_diffrn_reflns_theta_min          2.184
_diffrn_reflns_theta_max          30.050
_diffrn_reflns_theta_full         25.242
_diffrn_measured_fraction_theta_max   1.000
_diffrn_measured_fraction_theta_full  1.000
_diffrn_reflns_Laue_measured_fraction_max    1.000
_diffrn_reflns_Laue_measured_fraction_full   1.000
_diffrn_reflns_point_group_measured_fraction_max   0.998
_diffrn_reflns_point_group_measured_fraction_full  1.000
_reflns_number_total              3991
_reflns_number_gt                 3185
_reflns_threshold_expression      'I>2\s(I)'
_reflns_Friedel_coverage          0.741
_reflns_Friedel_fraction_max      0.995
_reflns_Friedel_fraction_full     1.000
 
_reflns_special_details
;
 Reflections were merged by SHELXL according to the crystal
 class for the calculation of statistics and refinement.
 
 _reflns_Friedel_fraction is defined as the number of unique
 Friedel pairs measured divided by the number that would be
 possible theoretically, ignoring centric projections and
 systematic absences.
;
 
_computing_data_collection        'Bruker APEX II'
_computing_cell_refinement        'Bruker SAINT'
_computing_data_reduction         'Bruker SAINT'
_computing_structure_solution     'SHELXS-97 (Sheldrick, 1997)'
_computing_structure_refinement 'SHELXL-97 (Sheldrick, 1997)'
_computing_molecular_graphics     'Bruker SHELXTL'
_computing_publication_material   'Bruker SHELXTL'
_refine_special_details           ?
_refine_ls_structure_factor_coef  Fsqd
_refine_ls_matrix_type            full
_refine_ls_weighting_scheme       calc
_refine_ls_weighting_details
'w=1/[\s^2^(Fo^2^)+(0.0445P)^2^] where P=(Fo^2^+2Fc^2^)/3'
_atom_sites_solution_primary      direct
_atom_sites_solution_secondary    ?
_atom_sites_solution_hydrogens    difmap
_refine_ls_hydrogen_treatment     refall
_refine_ls_extinction_method      none
_refine_ls_extinction_coef        .
_refine_ls_abs_structure_details
;
 Flack x determined using 1170 quotients [(I+)-(I-)]/[(I+)+(I-)]
 (Parsons, Flack and Wagner, Acta Cryst. B69 (2013) 249-259).
;
_refine_ls_abs_structure_Flack    0.01(4)
_chemical_absolute_configuration  ?
_refine_ls_number_reflns          3991
_refine_ls_number_parameters      246
_refine_ls_number_restraints      0
_refine_ls_R_factor_all           0.0560
_refine_ls_R_factor_gt            0.0364
_refine_ls_wR_factor_ref          0.0844
_refine_ls_wR_factor_gt           0.0773
_refine_ls_goodness_of_fit_ref    0.959
_refine_ls_restrained_S_all       0.959
_refine_ls_shift/su_max           0.000
_refine_ls_shift/su_mean          0.000
 
loop_
 _atom_site_label
 _atom_site_type_symbol
 _atom_site_fract_x
 _atom_site_fract_y
 _atom_site_fract_z
 _atom_site_U_iso_or_equiv
 _atom_site_adp_type
 _atom_site_occupancy
 _atom_site_site_symmetry_order  
 _atom_site_calc_flag
 _atom_site_refinement_flags_posn
 _atom_site_refinement_flags_adp
 _atom_site_refinement_flags_occupancy
 _atom_site_disorder_assembly
 _atom_site_disorder_group
Cl1 Cl 0.17065(9) 0.14091(5) 0.26528(3) 0.02400(14) Uani 1 1 d . . . . .
N1 N 0.3643(3) 0.88691(18) 0.58689(11) 0.0207(4) Uani 1 1 d . . . . .
N2 N 0.3098(3) 0.90673(17) 0.35238(10) 0.0186(4) Uani 1 1 d . . . . .
N3 N 0.4390(3) 0.87378(19) 0.19036(11) 0.0271(5) Uani 1 1 d . . . . .
N4 N 0.5774(3) 0.92447(18) 0.21947(11) 0.0259(5) Uani 1 1 d . . . . .
N5 N 0.7040(3) 0.9788(2) 0.23892(14) 0.0382(6) Uani 1 1 d . . . . .
C1 C 0.4062(3) 0.9934(2) 0.55085(13) 0.0186(5) Uani 1 1 d . . . . .
C2 C 0.4593(4) 1.0949(2) 0.59519(13) 0.0226(5) Uani 1 1 d . . . . .
C3 C 0.5124(4) 1.1997(2) 0.55968(14) 0.0246(5) Uani 1 1 d . . . . .
C4 C 0.5105(4) 1.2089(2) 0.47869(14) 0.0245(5) Uani 1 1 d . . . . .
C5 C 0.4548(3) 1.1119(2) 0.43553(13) 0.0209(5) Uani 1 1 d . . . . .
C6 C 0.4026(3) 1.0008(2) 0.46996(12) 0.0176(5) Uani 1 1 d . . . . .
C7 C 0.3535(3) 0.89321(18) 0.42621(12) 0.0168(4) Uani 1 1 d . . . . .
C8 C 0.3591(3) 0.77849(19) 0.46581(12) 0.0176(4) Uani 1 1 d . . . . .
C9 C 0.3777(3) 0.6636(2) 0.43005(14) 0.0232(5) Uani 1 1 d . . . . .
C10 C 0.3814(3) 0.5585(2) 0.47180(15) 0.0266(6) Uani 1 1 d . . . . .
C11 C 0.3588(4) 0.5627(2) 0.55239(15) 0.0267(5) Uani 1 1 d . . . . .
C12 C 0.3436(4) 0.6707(2) 0.58949(14) 0.0237(5) Uani 1 1 d . . . . .
C13 C 0.3539(3) 0.7804(2) 0.54749(12) 0.0193(4) Uani 1 1 d . . . . .
C14 C 0.2223(3) 0.8212(2) 0.29867(12) 0.0197(5) Uani 1 1 d . . . . .
C15 C 0.3575(4) 0.7740(2) 0.23734(13) 0.0224(5) Uani 1 1 d . . . . .
H4 H 0.546(3) 1.2947(19) 0.4582(12) 0.007(5) Uiso 1 1 d . . . . .
H10 H 0.397(3) 0.474(2) 0.4490(13) 0.009(6) Uiso 1 1 d . . . . .
H5 H 0.456(3) 1.1205(19) 0.3800(14) 0.019(6) Uiso 1 1 d . . . . .
H2 H 0.460(5) 1.079(2) 0.6487(17) 0.039(8) Uiso 1 1 d . . . . .
H14B H 0.165(4) 0.749(2) 0.3269(13) 0.016(6) Uiso 1 1 d . . . . .
H9 H 0.399(4) 0.662(2) 0.3755(17) 0.036(8) Uiso 1 1 d . . . . .
H12 H 0.334(4) 0.678(2) 0.6441(16) 0.031(7) Uiso 1 1 d . . . . .
H15B H 0.286(4) 0.724(2) 0.2013(14) 0.026(7) Uiso 1 1 d . . . . .
H11 H 0.347(4) 0.492(3) 0.5821(15) 0.037(8) Uiso 1 1 d . . . . .
H1N H 0.361(4) 0.886(2) 0.6387(19) 0.045(9) Uiso 1 1 d . . . . .
H14A H 0.118(4) 0.865(2) 0.2750(15) 0.027(7) Uiso 1 1 d . . . . .
H2N H 0.295(4) 0.979(3) 0.3373(15) 0.032(8) Uiso 1 1 d . . . . .
H3 H 0.549(4) 1.263(2) 0.5921(14) 0.029(7) Uiso 1 1 d . . . . .
H15A H 0.463(4) 0.724(2) 0.2593(16) 0.033(7) Uiso 1 1 d . . . . .
 
loop_
 _atom_site_aniso_label
 _atom_site_aniso_U_11
 _atom_site_aniso_U_22
 _atom_site_aniso_U_33
 _atom_site_aniso_U_23
 _atom_site_aniso_U_13
 _atom_site_aniso_U_12
Cl1 0.0310(3) 0.0256(3) 0.0154(2) -0.0010(2) -0.0043(2) 0.0030(3)
N1 0.0194(10) 0.0300(11) 0.0126(8) 0.0016(8) 0.0006(8) 0.0000(8)
N2 0.0221(11) 0.0207(9) 0.0129(8) 0.0000(7) -0.0023(8) 0.0001(8)
N3 0.0281(11) 0.0361(12) 0.0170(9) 0.0002(9) 0.0023(8) -0.0024(10)
N4 0.0310(12) 0.0244(10) 0.0225(11) 0.0036(8) 0.0060(9) 0.0027(9)
N5 0.0349(13) 0.0356(12) 0.0441(14) 0.0049(11) 0.0000(12) -0.0086(10)
C1 0.0142(10) 0.0260(12) 0.0156(10) 0.0013(9) 0.0006(8) 0.0003(9)
C2 0.0213(12) 0.0323(13) 0.0142(10) -0.0047(9) -0.0006(10) 0.0028(10)
C3 0.0238(12) 0.0266(13) 0.0234(12) -0.0082(10) -0.0028(10) 0.0006(10)
C4 0.0244(12) 0.0231(12) 0.0258(12) -0.0011(9) -0.0009(10) -0.0007(10)
C5 0.0220(12) 0.0246(12) 0.0162(10) 0.0004(9) -0.0009(9) 0.0008(10)
C6 0.0152(10) 0.0231(11) 0.0144(10) -0.0015(9) -0.0016(8) 0.0015(9)
C7 0.0126(10) 0.0226(10) 0.0150(10) 0.0001(8) 0.0029(8) 0.0012(9)
C8 0.0134(10) 0.0232(10) 0.0161(10) 0.0000(8) -0.0020(8) -0.0009(9)
C9 0.0222(12) 0.0261(12) 0.0213(12) -0.0003(9) -0.0029(9) -0.0015(10)
C10 0.0228(13) 0.0228(12) 0.0342(14) 0.0010(10) -0.0048(10) -0.0021(10)
C11 0.0200(12) 0.0272(12) 0.0330(13) 0.0120(10) -0.0047(11) -0.0029(11)
C12 0.0193(11) 0.0318(12) 0.0198(11) 0.0086(9) -0.0014(11) -0.0036(11)
C13 0.0126(10) 0.0265(11) 0.0188(10) 0.0035(8) -0.0001(9) -0.0020(10)
C14 0.0216(12) 0.0243(11) 0.0131(10) -0.0032(9) -0.0023(9) -0.0013(9)
C15 0.0262(12) 0.0239(11) 0.0172(10) -0.0017(9) 0.0028(11) -0.0010(10)
 
_geom_special_details
;
 All esds (except the esd in the dihedral angle between two l.s. planes)
 are estimated using the full covariance matrix.  The cell esds are taken
 into account individually in the estimation of esds in distances, angles
 and torsion angles; correlations between esds in cell parameters are only
 used when they are defined by crystal symmetry.  An approximate (isotropic)
 treatment of cell esds is used for estimating esds involving l.s. planes.
;
 
loop_
 _geom_bond_atom_site_label_1
 _geom_bond_atom_site_label_2
 _geom_bond_distance
 _geom_bond_site_symmetry_2
 _geom_bond_publ_flag
N1 C13 1.364(3) . ?
N1 C1 1.366(3) . ?
N1 H1N 0.90(3) . ?
N2 C7 1.331(3) . ?
N2 C14 1.466(3) . ?
N2 H2N 0.85(3) . ?
N3 N4 1.238(3) . ?
N3 C15 1.488(3) . ?
N4 N5 1.131(3) . ?
C1 C6 1.411(3) . ?
C1 C2 1.411(3) . ?
C2 C3 1.366(4) . ?
C2 H2 0.95(3) . ?
C3 C4 1.414(3) . ?
C3 H3 0.94(3) . ?
C4 C5 1.366(3) . ?
C4 H4 1.04(2) . ?
C5 C6 1.415(3) . ?
C5 H5 0.97(2) . ?
C6 C7 1.453(3) . ?
C7 C8 1.443(3) . ?
C8 C9 1.419(3) . ?
C8 C13 1.423(3) . ?
C9 C10 1.370(3) . ?
C9 H9 0.96(3) . ?
C10 C11 1.413(4) . ?
C10 H10 1.02(2) . ?
C11 C12 1.361(4) . ?
C11 H11 0.94(3) . ?
C12 C13 1.416(3) . ?
C12 H12 0.96(3) . ?
C14 C15 1.526(3) . ?
C14 H14B 1.02(2) . ?
C14 H14A 0.98(3) . ?
C15 H15B 0.97(3) . ?
C15 H15A 1.00(3) . ?
 
loop_
 _geom_angle_atom_site_label_1
 _geom_angle_atom_site_label_2
 _geom_angle_atom_site_label_3
 _geom_angle
 _geom_angle_site_symmetry_1
 _geom_angle_site_symmetry_3
 _geom_angle_publ_flag
C13 N1 C1 121.58(19) . . ?
C13 N1 H1N 119.5(18) . . ?
C1 N1 H1N 118.3(18) . . ?
C7 N2 C14 129.9(2) . . ?
C7 N2 H2N 115.7(18) . . ?
C14 N2 H2N 110.9(19) . . ?
N4 N3 C15 114.6(2) . . ?
N5 N4 N3 172.3(3) . . ?
N1 C1 C6 120.3(2) . . ?
N1 C1 C2 119.4(2) . . ?
C6 C1 C2 120.3(2) . . ?
C3 C2 C1 119.9(2) . . ?
C3 C2 H2 127.0(17) . . ?
C1 C2 H2 113.0(17) . . ?
C2 C3 C4 120.6(2) . . ?
C2 C3 H3 116.0(15) . . ?
C4 C3 H3 123.4(15) . . ?
C5 C4 C3 119.7(2) . . ?
C5 C4 H4 126.4(12) . . ?
C3 C4 H4 113.7(12) . . ?
C4 C5 C6 121.5(2) . . ?
C4 C5 H5 118.0(13) . . ?
C6 C5 H5 120.5(13) . . ?
C1 C6 C5 117.9(2) . . ?
C1 C6 C7 118.7(2) . . ?
C5 C6 C7 123.33(19) . . ?
N2 C7 C8 124.51(19) . . ?
N2 C7 C6 118.05(18) . . ?
C8 C7 C6 117.43(18) . . ?
C9 C8 C13 117.0(2) . . ?
C9 C8 C7 125.29(19) . . ?
C13 C8 C7 117.6(2) . . ?
C10 C9 C8 121.8(2) . . ?
C10 C9 H9 120.0(16) . . ?
C8 C9 H9 118.0(16) . . ?
C9 C10 C11 119.8(2) . . ?
C9 C10 H10 124.8(13) . . ?
C11 C10 H10 115.4(13) . . ?
C12 C11 C10 120.6(2) . . ?
C12 C11 H11 117.4(17) . . ?
C10 C11 H11 121.9(17) . . ?
C11 C12 C13 120.0(2) . . ?
C11 C12 H12 123.4(15) . . ?
C13 C12 H12 116.5(15) . . ?
N1 C13 C12 118.73(19) . . ?
N1 C13 C8 120.9(2) . . ?
C12 C13 C8 120.3(2) . . ?
N2 C14 C15 113.6(2) . . ?
N2 C14 H14B 111.4(13) . . ?
C15 C14 H14B 108.6(13) . . ?
N2 C14 H14A 105.6(14) . . ?
C15 C14 H14A 110.5(15) . . ?
H14B C14 H14A 107(2) . . ?
N3 C15 C14 112.03(19) . . ?
N3 C15 H15B 105.4(14) . . ?
C14 C15 H15B 108.6(16) . . ?
N3 C15 H15A 109.2(16) . . ?
C14 C15 H15A 112.8(16) . . ?
H15B C15 H15A 109(2) . . ?
 
loop_
 _geom_torsion_atom_site_label_1
 _geom_torsion_atom_site_label_2
 _geom_torsion_atom_site_label_3
 _geom_torsion_atom_site_label_4
 _geom_torsion
 _geom_torsion_site_symmetry_1
 _geom_torsion_site_symmetry_2
 _geom_torsion_site_symmetry_3
 _geom_torsion_site_symmetry_4
 _geom_torsion_publ_flag
C13 N1 C1 C6 12.8(3) . . . . ?
C13 N1 C1 C2 -165.0(2) . . . . ?
N1 C1 C2 C3 176.1(2) . . . . ?
C6 C1 C2 C3 -1.8(4) . . . . ?
C1 C2 C3 C4 1.5(4) . . . . ?
C2 C3 C4 C5 0.1(4) . . . . ?
C3 C4 C5 C6 -1.4(4) . . . . ?
N1 C1 C6 C5 -177.4(2) . . . . ?
C2 C1 C6 C5 0.4(3) . . . . ?
N1 C1 C6 C7 0.1(3) . . . . ?
C2 C1 C6 C7 177.9(2) . . . . ?
C4 C5 C6 C1 1.2(4) . . . . ?
C4 C5 C6 C7 -176.2(2) . . . . ?
C14 N2 C7 C8 14.1(4) . . . . ?
C14 N2 C7 C6 -167.2(2) . . . . ?
C1 C6 C7 N2 165.4(2) . . . . ?
C5 C6 C7 N2 -17.2(3) . . . . ?
C1 C6 C7 C8 -15.7(3) . . . . ?
C5 C6 C7 C8 161.6(2) . . . . ?
N2 C7 C8 C9 20.7(4) . . . . ?
C6 C7 C8 C9 -158.1(2) . . . . ?
N2 C7 C8 C13 -162.2(2) . . . . ?
C6 C7 C8 C13 19.0(3) . . . . ?
C13 C8 C9 C10 3.1(4) . . . . ?
C7 C8 C9 C10 -179.8(2) . . . . ?
C8 C9 C10 C11 2.5(4) . . . . ?
C9 C10 C11 C12 -3.5(4) . . . . ?
C10 C11 C12 C13 -1.2(4) . . . . ?
C1 N1 C13 C12 168.9(2) . . . . ?
C1 N1 C13 C8 -9.2(4) . . . . ?
C11 C12 C13 N1 -171.1(2) . . . . ?
C11 C12 C13 C8 7.0(4) . . . . ?
C9 C8 C13 N1 170.2(2) . . . . ?
C7 C8 C13 N1 -7.0(4) . . . . ?
C9 C8 C13 C12 -7.8(4) . . . . ?
C7 C8 C13 C12 174.9(2) . . . . ?
C7 N2 C14 C15 -109.5(3) . . . . ?
N4 N3 C15 C14 83.2(3) . . . . ?
N2 C14 C15 N3 -58.8(3) . . . . ?
 
_refine_diff_density_max    0.267
_refine_diff_density_min   -0.255
_refine_diff_density_rms    0.052

_publ_section_references 
;
Bruker, Programs APEX II, version 2.0-1; SAINT, version 7.23A;
SADABS, version 2004/1; XPREP, version 2005/2;
SHELXTL, version 6.1. Bruker AXS Inc., Madison, WI, USA, 2005.

G.M. Sheldrick, Programs SHELXS97 (crystal structure solution)
and SHELXL97 (crystal structure refinement), University  of
Gottingen, Germany, 1997.
;

_shelx_res_file
;
TITL a in P2(1)2(1)2(1)
    a.res
    created by SHELXL-2018/3 at 19:17:25 on 09-Feb-2022
CELL 0.71073   7.08540  11.04300  17.41070  90.0000  90.0000  90.0000
ZERR    4.00   0.00030   0.00040   0.00070   0.0000   0.0000   0.0000
LATT -1
SYMM 0.5-X, -Y, 0.5+Z
SYMM -X, 0.5+Y, 0.5-Z
SYMM 0.5+X, 0.5-Y, -Z
SFAC C H N Cl
UNIT 60 56 20 4
TEMP -133.000
size 0.211 0.143 0.022
acta
L.S. 8
BOND $h
htab
conf
FMAP 2
PLAN 20

WGHT    0.044500
FVAR       0.18455
CL1   4    0.170652    0.140913    0.265279    11.00000    0.03100    0.02556 =
         0.01544   -0.00098   -0.00427    0.00302
N1    3    0.364344    0.886907    0.586890    11.00000    0.01944    0.03003 =
         0.01256    0.00161    0.00055   -0.00003
N2    3    0.309849    0.906730    0.352375    11.00000    0.02209    0.02075 =
         0.01289   -0.00003   -0.00232    0.00012
N3    3    0.438971    0.873784    0.190355    11.00000    0.02809    0.03606 =
         0.01704    0.00021    0.00226   -0.00242
N4    3    0.577357    0.924470    0.219472    11.00000    0.03096    0.02435 =
         0.02246    0.00364    0.00599    0.00266
N5    3    0.704006    0.978751    0.238924    11.00000    0.03492    0.03558 =
         0.04408    0.00492    0.00003   -0.00857
C1    1    0.406216    0.993435    0.550851    11.00000    0.01423    0.02597 =
         0.01560    0.00132    0.00063    0.00025
C2    1    0.459322    1.094864    0.595186    11.00000    0.02131    0.03226 =
         0.01421   -0.00472   -0.00064    0.00276
C3    1    0.512411    1.199737    0.559677    11.00000    0.02380    0.02660 =
         0.02342   -0.00820   -0.00278    0.00057
C4    1    0.510464    1.208860    0.478694    11.00000    0.02439    0.02315 =
         0.02585   -0.00109   -0.00086   -0.00068
C5    1    0.454802    1.111912    0.435532    11.00000    0.02198    0.02461 =
         0.01620    0.00039   -0.00090    0.00082
C6    1    0.402609    1.000771    0.469961    11.00000    0.01517    0.02308 =
         0.01440   -0.00146   -0.00156    0.00148
C7    1    0.353496    0.893208    0.426215    11.00000    0.01264    0.02261 =
         0.01505    0.00005    0.00287    0.00124
C8    1    0.359065    0.778491    0.465812    11.00000    0.01343    0.02316 =
         0.01609    0.00001   -0.00197   -0.00094
C9    1    0.377713    0.663606    0.430052    11.00000    0.02219    0.02612 =
         0.02127   -0.00033   -0.00291   -0.00149
C10   1    0.381368    0.558465    0.471799    11.00000    0.02284    0.02282 =
         0.03415    0.00101   -0.00481   -0.00211
C11   1    0.358804    0.562718    0.552394    11.00000    0.02001    0.02715 =
         0.03302    0.01203   -0.00469   -0.00294
C12   1    0.343564    0.670730    0.589487    11.00000    0.01933    0.03184 =
         0.01980    0.00859   -0.00142   -0.00358
C13   1    0.353911    0.780391    0.547494    11.00000    0.01261    0.02654 =
         0.01884    0.00352   -0.00008   -0.00200
C14   1    0.222319    0.821231    0.298667    11.00000    0.02161    0.02429 =
         0.01312   -0.00323   -0.00232   -0.00128
C15   1    0.357549    0.774040    0.237337    11.00000    0.02619    0.02386 =
         0.01720   -0.00174    0.00277   -0.00100
H4    2    0.546433    1.294744    0.458218    11.00000    0.00712
H10   2    0.396691    0.473885    0.448956    11.00000    0.00931
H5    2    0.455698    1.120513    0.380005    11.00000    0.01881
H2    2    0.459934    1.078805    0.648687    11.00000    0.03866
H14B  2    0.164969    0.748800    0.326920    11.00000    0.01618
H9    2    0.399351    0.661524    0.375521    11.00000    0.03617
H12   2    0.334025    0.677948    0.644117    11.00000    0.03066
H15B  2    0.286500    0.724155    0.201345    11.00000    0.02612
H11   2    0.346952    0.491765    0.582138    11.00000    0.03691
H1N   2    0.361241    0.886025    0.638688    11.00000    0.04546
H14A  2    0.117871    0.865233    0.274968    11.00000    0.02725
H2N   2    0.294757    0.979347    0.337269    11.00000    0.03211
H3    2    0.548551    1.263298    0.592095    11.00000    0.02922
H15A  2    0.462666    0.724122    0.259306    11.00000    0.03255
HKLF 4


REM  a in P2(1)2(1)2(1)
REM wR2 = 0.084358, GooF = S = 0.95905, Restrained GooF = 0.95905 for all data
REM R1 = 0.036426 for 3185 Fo > 4sig(Fo) and 0.056015 for all 3991 data
REM 246 parameters refined using 0 restraints

END

WGHT      0.0394      0.0000

REM Instructions for potential hydrogen bonds
EQIV $1 -x+1/2, -y+1, z+1/2
HTAB C12 Cl1_$1
HTAB N1 Cl1_$1
EQIV $2 x, y+1, z
HTAB N2 Cl1_$2
EQIV $3 -x+1, y+1/2, -z+1/2
HTAB C15 Cl1_$3

REM Highest difference peak  0.267,  deepest hole -0.255,  1-sigma level  0.052
Q1    1   0.3986  0.9481  0.4514  11.00000  0.05    0.27
Q2    1   0.3596  0.7869  0.5054  11.00000  0.05    0.24
Q3    1   0.3473  0.7233  0.4541  11.00000  0.05    0.24
Q4    1   0.3891  1.0036  0.5086  11.00000  0.05    0.22
Q5    1   0.5659  1.3146  0.4846  11.00000  0.05    0.21
Q6    1   0.3829  0.9430  0.5621  11.00000  0.05    0.20
Q7    1   0.1945  0.1037  0.3113  11.00000  0.05    0.19
Q8    1   0.2954  1.3237  0.4825  11.00000  0.05    0.19
Q9    1   0.5059  1.1817  0.5205  11.00000  0.05    0.18
Q10   1   0.3453  0.7233  0.5629  11.00000  0.05    0.18
Q11   1   0.4334  1.1534  0.5650  11.00000  0.05    0.18
Q12   1   0.3387  0.9211  0.6763  11.00000  0.05    0.18
Q13   1   0.3465  0.8338  0.4408  11.00000  0.05    0.18
Q14   1   0.4071  1.1726  0.4723  11.00000  0.05    0.18
Q15   1   0.5543  1.1156  0.6537  11.00000  0.05    0.18
Q16   1   0.3704  0.8214  0.5658  11.00000  0.05    0.17
Q17   1   0.3254  1.0127  0.1754  11.00000  0.05    0.17
Q18   1   0.1570  0.6606  0.1755  11.00000  0.05    0.17
Q19   1   0.4653  1.0366  0.6896  11.00000  0.05    0.17
Q20   1   0.6774  0.9783  0.3285  11.00000  0.05    0.17
;
_shelx_res_checksum   33162

_shelx_hkl_file
;
   1   0   0    0.12    0.09
  -1   0   0    0.03    0.05
   2   0   0    0.48    0.22
   2   0   0    0.33    0.10
  -2   0   0    0.25    0.10
  -2   0   0    0.27    0.22
   3   0   0   -0.04    0.30
  -3   0   0   -0.05    0.13
   3   0   0    0.10    0.13
  -3   0   0    0.40    0.29
   4   0   0  201.04   10.01
  -4   0   0  192.23   10.10
  -5   0   0    0.19    0.48
   5   0   0   -0.12    0.25
   6   0   0   46.55    2.46
   6   0   0   43.78    2.45
   7   0   0   -0.16    0.37
   7   0   0    0.01    0.39
   8   0   0    0.62    0.46
   8   0   0   -0.18    0.54
   9   0   0    0.33    0.64
   9   0   0   -0.49    0.67
   0   1   0    0.00    0.03
   0  -1   0    0.02    0.02
   0  -1   0    0.01    0.02
   0  -1   0    0.01    0.03
   0   1   0    0.01    0.02
   1  -1   0  119.71    6.15
   1   1   0  121.72    6.17
   1  -1   0  123.69    6.14
  -1   1   0  119.14    6.14
  -1   1   0  122.60    6.15
  -1  -1   0  124.02    6.17
   1   1   0  121.77    6.13
   1   1   0  119.45    6.14
  -1   1   0  120.31    6.14
   2   1   0  734.84   37.79
  -2  -1   0  747.50   37.81
   2  -1   0  734.91   38.05
  -2   1   0  749.27   38.07
   3   1   0   21.20    1.11
  -3   1   0   21.06    1.23
  -3  -1   0   20.83    1.23
  -3   1   0   20.63    1.14
   3  -1   0   20.95    1.14
   3  -1   0   19.65    1.20
   3   1   0   20.34    1.28
   3  -1   0   20.82    1.14
   4   1   0   74.79    3.91
  -4  -1   0   78.41    4.05
   4  -1   0   76.55    3.93
  -4   1   0   74.00    4.02
  -5   1   0    0.04    0.50
   5  -1   0    0.05    0.28
   5   1   0   -0.13    0.22
   5   1   0    0.33    0.25
   6   1   0   28.51    1.62
   6  -1   0   28.10    1.66
   6   1   0   29.13    1.65
  -6   1   0   27.20    1.84
   7   1   0    6.43    0.67
   7   1   0    8.14    0.71
   7  -1   0    8.18    0.76
   7  -1   0    7.13    0.69
   8  -1   0   24.94    1.79
   8  -1   0   32.56    1.81
   8   1   0   28.43    1.79
   8   1   0   28.27    1.76
   9   1   0    0.01    0.58
   9  -1   0   -0.05    0.70
   9  -1   0   -0.22    0.59
   9   1   0   -0.22    0.66
   0  -2   0    2.35    0.18
   0   2   0    2.38    0.18
   0  -2   0    2.51    0.15
   0   2   0    2.52    0.17
   0   2   0    2.36    0.15
   0  -2   0    2.50    0.17
   1   2   0    2.90    0.22
   1   2   0    3.36    0.29
   1  -2   0    3.27    0.24
  -1   2   0    3.10    0.23
   1   2   0    3.09    0.21
   1  -2   0    3.36    0.26
   1  -2   0    3.49    0.21
  -1   2   0    3.86    0.24
  -1   2   0    3.26    0.24
  -2   2   0    0.07    0.17
  -2   2   0    0.12    0.14
   2  -2   0    0.12    0.16
   2  -2   0    0.06    0.15
   2   2   0    0.13    0.12
   2   2   0    0.05    0.12
   2   2   0    0.14    0.08
   2  -2   0    0.16    0.16
  -2   2   0   -0.17    0.13
   3  -2   0  195.91    9.81
   3  -2   0  190.01    9.78
   3   2   0  191.37    9.78
  -3   2   0  196.16    9.82
   3   2   0  185.63    9.77
   3   2   0  196.23    9.75
  -4   2   0    5.68    0.58
   4  -2   0    6.05    0.49
   4   2   0    5.37    0.46
  -4  -2   0    6.03    0.46
   5   2   0    0.86    0.25
   5   2   0    1.14    0.29
  -5   2   0    0.85    0.48
   5  -2   0    1.66    0.36
   6   2   0   33.69    1.94
  -6   2   0   33.75    2.12
   6   2   0   35.49    1.90
   6  -2   0   34.60    1.96
   7   2   0   -0.03    0.40
   7   2   0   -0.03    0.35
   7  -2   0    0.23    0.40
   7  -2   0    0.48    0.45
   8   2   0    4.18    0.63
   8  -2   0    2.46    0.63
   8   2   0    3.65    0.63
   8  -2   0    4.53    0.62
   9  -2   0   10.21    1.01
   9  -2   0    8.27    1.06
   0   3   0    0.15    0.10
   0   3   0    0.25    0.12
   0  -3   0    0.01    0.06
   0  -3   0    0.25    0.13
   0  -3   0   -0.17    0.09
   1   3   0  240.52   12.09
   1  -3   0  234.88   12.10
  -1  -3   0  238.83   12.09
   1  -3   0  241.55   12.08
  -1   3   0  235.63   12.11
  -1  -3   0  235.78   12.10
   1  -3   0  242.97   12.11
   1   3   0  242.79   12.10
  -1   3   0  244.88   12.09
  -1   3   0  235.68   12.10
  -2  -3   0   13.80    0.72
   2  -3   0   13.14    0.74
   2  -3   0   13.17    0.75
   2   3   0   13.25    0.74
   2  -3   0   11.97    0.73
  -2   3   0   12.52    0.75
  -2   3   0   13.06    0.76
   2   3   0   13.02    0.83
  -2   3   0   13.53    0.74
   2   3   0   12.48    0.71
   3   3   0    7.83    0.55
   3  -3   0    8.94    0.57
   3   3   0    8.34    0.49
   3   3   0    8.19    0.54
  -3   3   0    8.53    0.65
   3  -3   0    8.03    0.60
  -3   3   0    8.03    0.55
   4   3   0   58.60    3.07
   4   3   0   55.81    3.05
   4   3   0   58.56    3.02
  -4   3   0   59.78    3.14
   4  -3   0   59.64    3.09
   5  -3   0   10.88    0.83
  -5   3   0   11.06    0.93
   5   3   0   10.25    0.74
   5   3   0   10.71    0.69
   6   3   0    7.43    0.70
   6   3   0    7.30    0.57
   6  -3   0    5.96    0.65
  -6   3   0    5.04    0.77
   7   3   0   17.02    1.16
   7  -3   0   17.66    1.23
   7  -3   0   18.24    1.19
   7   3   0   17.03    1.18
   8  -3   0    0.39    0.45
   8   3   0    0.17    0.48
   8  -3   0    0.25    0.56
   9  -3   0    1.73    0.67
   9  -3   0    1.11    0.77
   9   3   0    1.00    0.62
   0  -4   0   98.39    5.19
   0   4   0  100.62    5.19
   0   4   0  101.90    5.19
   0  -4   0  101.93    5.16
   0  -4   0  104.48    5.19
   0   4   0  104.15    5.17
  -1   4   0    8.91    0.50
  -1  -4   0    8.83    0.52
  -1   4   0    8.49    0.57
   1   4   0    9.26    0.53
  -1   4   0    9.04    0.54
   1  -4   0    9.21    0.56
  -1  -4   0    9.15    0.53
   1   4   0    9.05    0.52
   1  -4   0    9.29    0.51
   2   4   0    1.06    0.17
  -2   4   0    1.08    0.21
  -2   4   0    1.45    0.21
   2   4   0    1.23    0.34
   2  -4   0    1.20    0.15
  -2  -4   0    1.52    0.18
   2   4   0    1.40    0.17
   2  -4   0    0.80    0.23
  -3   4   0    5.25    0.49
   3  -4   0    5.44    0.45
   3  -4   0    5.78    0.47
   3   4   0    5.50    0.42
  -3   4   0    6.35    0.46
   3   4   0    5.84    0.45
   3   4   0    5.87    0.37
   4   4   0    1.38    0.21
  -4   4   0    2.18    0.43
   4   4   0    2.00    0.31
   4  -4   0    1.09    0.32
   4   4   0    1.33    0.27
   5   4   0    6.85    0.52
   5   4   0    7.00    0.61
   5  -4   0    7.46    0.67
  -5   4   0    6.20    0.74
   6   4   0   12.15    0.93
   6  -4   0   11.64    0.97
  -6   4   0   13.96    1.13
   6   4   0   12.49    0.83
   7  -4   0    5.13    0.59
   7  -4   0    4.63    0.68
   7   4   0    3.89    0.58
   8  -4   0    9.61    0.90
   8  -4   0    9.01    1.01
   8   4   0    9.28    0.89
   9  -4   0    3.82    0.77
   9   4   0    3.85    0.79
   0  -5   0    0.21    0.17
   0  -5   0   -0.08    0.10
   0   5   0   -0.02    0.14
   0   5   0    0.06    0.12
  -1  -5   0   19.87    1.07
  -1   5   0   19.20    1.11
  -1   5   0   20.13    1.04
   1  -5   0   20.00    1.05
   1   5   0   19.39    1.08
  -1   5   0   20.59    1.10
   1  -5   0   18.51    1.16
   1   5   0   20.28    1.07
  -1  -5   0   20.08    1.08
   1   5   0   20.10    1.08
   2  -5   0   22.64    1.17
   2   5   0   21.32    1.18
   2   5   0   20.34    1.33
  -2   5   0   22.70    1.22
  -2  -5   0   23.23    1.19
   2  -5   0   22.48    1.25
  -2   5   0   21.73    1.21
   3   5   0    0.48    0.20
   3  -5   0    0.10    0.20
   3   5   0    0.28    0.21
   3  -5   0    0.63    0.28
   3   5   0    0.39    0.13
  -3   5   0    0.29    0.28
  -3   5   0    0.33    0.24
   4  -5   0    5.11    0.54
  -4   5   0    7.76    0.57
  -4   5   0    4.77    0.58
   4   5   0    5.60    0.49
   4   5   0    5.45    0.41
  -5   5   0    0.41    0.51
   5   5   0    0.18    0.22
   5   5   0    0.02    0.31
   5  -5   0    0.46    0.44
  -6   5   0    4.02    0.75
   6   5   0    3.63    0.41
   6   5   0    3.53    0.53
   6  -5   0    3.09    0.61
   7   5   0   27.22    1.73
   7  -5   0   28.87    1.70
   7  -5   0   29.92    1.86
   8  -5   0    0.84    0.56
   8   5   0    0.60    0.58
   8  -5   0   -0.06    0.65
   9  -5   0    1.37    0.93
   9  -5   0    2.55    0.74
   9   5   0    1.82    0.69
   0  -6   0    0.33    0.14
   0   6   0    0.35    0.16
   0   6   0   -0.09    0.23
   0   6   0    0.35    0.20
   0  -6   0    0.32    0.22
  -1   6   0   26.19    1.37
  -1  -6   0   27.54    1.42
   1  -6   0   25.64    1.37
   1   6   0   26.00    1.43
  -1  -6   0   26.55    1.41
   1   6   0   26.33    1.40
   1  -6   0   26.58    1.46
  -1   6   0   25.67    1.43
  -2  -6   0   13.63    0.79
   2   6   0   12.17    0.80
  -2   6   0   15.58    0.85
   2   6   0   14.58    0.82
   2  -6   0   14.69    0.90
  -2   6   0   13.44    0.80
   2  -6   0   13.32    0.78
  -3   6   0    9.21    0.64
  -3   6   0    8.74    0.69
  -3  -6   0    9.72    0.59
   3  -6   0    7.08    0.66
   3   6   0    9.25    0.63
   3   6   0    8.79    0.60
   4   6   0    0.14    0.17
   4   6   0    0.37    0.28
  -4   6   0    0.14    0.31
  -4   6   0   -0.46    0.39
   4  -6   0    0.23    0.40
  -5   6   0    7.36    0.80
   5   6   0    7.64    0.56
   5  -6   0    7.55    0.74
   5   6   0    8.98    0.71
   6   6   0    0.14    0.37
   6  -6   0    0.04    0.53
  -6   6   0    0.59    0.65
   7  -6   0    3.57    0.77
   7   6   0    4.33    0.66
   7  -6   0    4.08    0.58
   8   6   0    1.10    0.64
   8  -6   0   -0.18    0.75
   9   6   0    0.01    0.74
   9  -6   0   -0.61    0.89
   0  -7   0    0.20    0.25
   0   7   0    0.09    0.18
   0   7   0    0.18    0.21
   0  -7   0    0.00    0.16
   1   7   0   15.46    0.92
   1  -7   0   13.86    0.83
  -1   7   0   15.89    0.92
   1  -7   0   14.70    0.96
   1   7   0   12.99    1.01
  -1  -7   0   15.16    0.91
   1   7   0   15.33    0.91
   1   7   0   17.19    0.89
  -1   7   0   16.23    0.83
   2   7   0    4.11    0.39
  -2   7   0    3.97    0.35
   2  -7   0    4.22    0.49
   2   7   0    4.02    0.39
  -2   7   0    3.65    0.41
   2   7   0    4.24    0.38
  -2  -7   0    3.92    0.36
   2  -7   0    3.94    0.34
  -3  -7   0   16.16    0.95
  -3   7   0   16.86    1.02
   3   7   0   16.53    1.00
   3  -7   0   14.85    1.06
  -3   7   0   16.83    1.02
  -4   7   0   20.68    1.27
   4   7   0   20.80    1.15
   4   7   0   22.13    1.27
  -4   7   0   19.48    1.32
   4  -7   0   21.20    1.34
   5  -7   0    0.82    0.47
  -5   7   0    0.89    0.55
  -5   7   0    1.22    0.41
   6  -7   0    0.11    0.57
   6   7   0    0.24    0.44
   7   7   0    0.28    0.54
   7  -7   0    0.28    0.62
   8  -7   0   -0.10    0.91
   0   8   0   19.51    1.12
   0   8   0   21.69    1.19
   0  -8   0   20.16    1.21
   1   8   0    0.20    0.26
  -1   8   0    0.12    0.16
  -1  -8   0    0.27    0.26
  -1   8   0    0.16    0.26
   1  -8   0    0.32    0.35
   1   8   0    0.09    0.24
  -2   8   0    0.88    0.32
  -2  -8   0    0.67    0.26
  -2   8   0    0.58    0.25
   2   8   0    0.72    0.28
   2  -8   0    1.06    0.42
   2   8   0    0.42    0.29
   3   8   0   28.76    1.60
  -3   8   0   28.81    1.64
   3  -8   0   28.10    1.68
  -3  -8   0   28.01    1.56
   4  -8   0    7.82    0.78
   4   8   0    8.31    0.67
  -4   8   0    6.63    0.65
   5  -8   0   17.77    1.28
  -5   8   0   14.36    1.09
   5   8   0   15.60    1.06
   6   8   0    0.01    0.47
   6  -8   0    0.49    0.63
   7  -8   0    5.20    0.93
   7   8   0    4.07    0.68
   8  -8   0    1.31    0.93
   8   8   0    3.73    0.82
   0   9   0   -0.22    0.28
   0   9   0   -0.01    0.22
   0  -9   0    0.10    0.34
  -1  -9   0   66.60    3.28
   1   9   0   59.11    3.29
   1  -9   0   62.69    3.33
  -1   9   0   60.82    3.30
   1   9   0   61.83    3.25
   2   9   0   10.53    0.80
   2  -9   0   10.26    0.84
   2   9   0   10.08    0.78
  -2   9   0   11.26    0.84
  -2  -9   0   11.51    0.76
  -3   9   0   67.56    3.55
   3  -9   0   65.11    3.60
   3   9   0   66.45    3.52
   3   9   0   67.42    3.54
   4  -9   0   -0.37    0.53
  -4   9   0   -0.30    0.37
   4   9   0   -0.24    0.37
  -5   9   0   17.15    1.22
   5   9   0   16.38    1.22
   5  -9   0   19.69    1.35
   6  -9   0    0.05    0.64
  -6   9   0    1.25    0.55
   6   9   0   -0.32    0.50
   7   9   0    1.33    0.67
   8   9   0   -0.14    0.76
   8  -9   0   -0.37    0.88
   0  10   0    7.16    0.66
   0 -10   0    8.90    0.69
  -1 -10   0   19.92    1.23
   1  10   0   20.96    1.24
   1 -10   0   19.35    1.32
  -1  10   0   20.26    1.25
   2 -10   0   14.31    1.05
  -2  10   0   14.71    0.96
   2  10   0   12.92    0.92
   2  10   0   12.25    0.92
   3  10   0   57.37    3.11
   3 -10   0   60.69    3.20
  -3  10   0   58.15    3.11
   3  10   0   55.17    3.09
   4 -10   0    5.88    0.80
   4  10   0    4.00    0.65
   4  10   0    4.83    0.58
  -4  10   0    4.89    0.62
  -5  10   0    0.90    0.53
   5 -10   0   -0.39    0.66
   5  10   0   -0.21    0.49
   6  10   0    0.23    0.60
   6 -10   0    0.51    0.71
  -6  10   0    0.63    0.63
   7 -10   0    6.46    1.07
   7  10   0    8.24    1.00
   0  11   0    0.16    0.37
   0 -11   0   -0.07    0.42
   1 -11   0    3.30    0.60
   1  11   0    4.54    0.56
  -1  11   0    3.59    0.53
  -1 -11   0    4.45    0.57
  -2  11   0   -0.13    0.43
   2  11   0   -0.17    0.42
   2 -11   0   -0.06    0.51
   3 -11   0   -0.12    0.51
  -3  11   0   -0.31    0.41
   3  11   0    0.56    0.46
   4  11   0    1.82    0.57
   4 -11   0    2.32    0.73
  -4  11   0    1.59    0.57
   4  11   0    2.30    0.56
  -5  11   0   11.28    1.08
   5 -11   0   12.88    1.24
   5  11   0   13.63    1.10
   5  11   0   13.61    1.08
   6 -11   0    0.18    0.87
  -6  11   0    0.78    0.71
   6  11   0   -0.11    0.68
   7 -11   0    3.52    1.03
   7  11   0    4.25    0.91
   0 -12   0    0.24    0.51
   0  12   0    0.43    0.43
   1  12   0    4.19    0.60
   1 -12   0    2.95    0.70
  -1  12   0    3.72    0.60
   2  12   0    1.45    0.46
  -2  12   0    0.98    0.48
   2 -12   0    0.91    0.63
   3 -12   0   -0.04    0.65
  -3  12   0   -0.17    0.49
   3  12   0    0.04    0.48
   4 -12   0    1.16    0.76
  -4  12   0    0.66    0.55
   4  12   0    0.58    0.52
   5 -12   0    1.15    0.78
  -5  12   0    2.82    0.70
   5  12   0    3.80    0.83
   6  12   0    5.14    0.85
  -6  12   0    3.27    0.81
   6 -12   0    4.88    1.10
   0  13   0    0.37    0.50
   1  13   0    0.53    0.51
  -1  13   0    1.19    0.58
   1 -13   0    2.08    0.68
   2 -13   0    9.97    0.98
   2  13   0    7.96    0.84
  -2  13   0    8.13    0.84
  -3  13   0    0.34    0.54
   3 -13   0   -0.17    0.76
   3  13   0   -0.06    0.57
  -4  13   0    0.30    0.60
   4 -13   0    0.53    0.85
   4  13   0    1.01    0.65
   5 -13   0    0.04    0.92
  -5  13   0    1.24    0.78
   5  13   0    1.10    0.67
   0  14   0    7.95    0.86
  -2  14   0   -0.06    0.57
   2  14   0   -0.25    0.57
   2 -14   0    0.06    0.90
  -3  14   0    0.20    0.69
   3 -14   0    0.55    0.87
   3  14   0    0.27    0.61
   4 -14   0    2.94    1.04
  -4  14   0    3.77    0.86
   4  14   0    2.67    0.80
   0  15   0   -1.24    0.60
   1  15   0   -0.29    0.63
  -1  15   0   -0.49    0.64
   2  15   0    0.33    0.76
  -2  15   0    0.24    0.73
   0   0  -1    0.00    0.02
   0   0  -1    0.00    0.02
  -1   0  -1   13.47    0.72
  -1   0   1   13.35    0.72
   1   0  -1   12.99    0.74
   1   0   1   13.88    0.72
  -1   0  -1   14.28    0.72
   1   0   1   14.32    0.72
   2   0   1  981.99   50.43
   2   0  -1  986.01   50.36
  -2   0   1 1000.00   50.37
   3   0   1   28.11    1.44
   3   0  -1   26.49    1.54
  -3   0   1   24.90    1.43
  -3   0  -1   27.48    1.59
   3   0   1   28.45    1.56
   3   0  -1   29.06    1.44
  -3   0  -1   25.63    1.43
   4   0  -1    2.04    0.26
   4   0   1    1.18    0.25
  -4   0   1    1.74    0.42
   4   0   1    1.54    0.26
  -5   0   1   13.99    1.09
   5   0   1   13.31    0.88
   5   0  -1   13.67    0.87
   5   0   1   13.55    0.87
   6   0  -1   41.00    2.30
  -6   0   1   43.12    2.51
   6   0   1   39.94    2.29
   6   0   1   44.19    2.31
   7   0   1    7.27    0.70
   7   0  -1    7.10    0.68
   7   0   1    7.97    0.71
   8   0   1    3.15    0.57
   8   0  -1    2.12    0.57
   8   0   1    2.86    0.65
   8   0  -1    2.30    0.60
   9   0  -1    0.54    0.64
   9   0   1    1.01    0.60
   9   0  -1    0.54    0.70
   9   0   1    1.40    0.73
   0  -1  -1   84.56    4.15
   0  -1  -1   70.12    4.16
   0  -1  -1   85.46    4.16
   0   1  -1   85.95    4.15
   0   1   1   82.35    4.15
   0  -1   1   85.25    4.15
  -1   1   1   76.09    3.94
   1   1  -1   77.01    3.94
  -1  -1  -1   76.31    3.92
   1  -1   1   74.45    3.94
  -1  -1  -1   75.34    3.94
   1  -1   1   76.02    3.94
   1   1  -1   74.03    3.96
  -1   1   1   76.74    3.93
  -1   1   1   78.00    3.95
   1  -1  -1   80.41    3.95
   1  -1  -1   80.69    3.94
   1   1   1   78.67    3.95
   1   1   1   78.69    3.92
  -1   1  -1   76.21    3.94
  -1   1  -1   79.42    3.94
  -1   1  -1   80.57    3.95
  -1  -1   1   77.20    3.94
   1  -1  -1   78.27    3.93
  -1  -1   1   80.93    3.97
  -2   1   1  257.43   13.25
   2   1  -1  266.30   13.30
   2  -1   1  258.34   13.25
  -2   1   1  258.68   13.29
   2   1  -1  263.06   13.24
   2  -1   1  259.37   13.28
  -2  -1  -1  258.53   13.23
   2  -1   1  260.86   13.26
  -2   1  -1  265.83   13.28
   2  -1  -1  259.26   13.25
  -2  -1   1  267.52   13.25
   2   1   1  266.02   13.26
  -2  -1   1  273.58   13.31
   2   1   1  263.20   13.24
  -2   1  -1  257.85   13.25
   2  -1  -1  263.47   13.28
   2  -1  -1  265.61   13.26
   2   1   1  254.16   13.30
  -3  -1  -1    7.06    0.46
   3  -1   1    7.03    0.60
   3   1  -1    7.86    0.46
  -3   1   1    8.31    0.62
   3  -1   1    7.86    0.51
  -3   1   1    7.26    0.49
  -3  -1   1    6.17    0.58
   3  -1  -1    7.68    0.50
  -3   1  -1    8.73    0.60
  -3   1  -1    7.10    0.48
   3   1   1    7.09    0.65
   3   1   1    7.17    0.48
   3  -1  -1    7.39    0.60
   3   1   1    7.36    0.46
  -4   1   1  156.31    7.88
   4  -1   1  158.36    7.79
   4   1  -1  154.11    7.77
  -4  -1  -1  144.52    7.75
   4   1   1  146.21    7.76
   4  -1  -1  152.09    7.78
  -4   1  -1  153.86    7.87
  -4  -1   1  151.21    7.88
   4   1   1  156.62    7.79
   5  -1   1   12.05    0.80
  -5   1   1   12.26    1.03
   5  -1   1   13.77    0.85
   5   1  -1   13.34    0.79
  -5  -1   1   10.71    1.03
   5   1   1   11.59    0.80
   5  -1  -1   10.53    0.81
   5   1   1   12.43    0.79
   6   1  -1    2.85    0.43
  -6   1   1    2.21    0.65
   6  -1   1    3.23    0.42
   6  -1   1    2.28    0.47
   6  -1  -1    2.40    0.45
   6   1   1    2.80    0.42
  -6  -1   1    2.44    0.68
   6   1   1    2.93    0.42
   7   1  -1    6.64    0.68
   7  -1   1    6.46    0.64
   7   1  -1    5.84    0.62
   7  -1   1    5.95    0.73
  -7   1   1    5.03    0.88
   7  -1  -1    6.26    0.69
   7   1   1    6.32    0.67
   7   1   1    4.52    0.59
   8  -1   1    3.35    0.59
   8  -1   1    4.83    0.73
   8   1  -1    4.36    0.68
   8   1  -1    4.06    0.61
   8   1   1    3.17    0.63
   8  -1  -1    3.44    0.67
   8  -1  -1    4.77    0.63
   8   1   1    3.04    0.63
   9  -1   1    0.39    0.70
   9   1  -1   -0.28    0.66
   9  -1   1    0.73    0.64
   9   1  -1    0.62    0.59
   9   1   1    0.34    0.58
   9  -1  -1   -0.06    0.62
   9  -1  -1    0.43    0.70
   0   2  -1   31.69    1.66
   0  -2   1   32.88    1.66
   0   2  -1   32.15    1.66
   0   2   1   32.64    1.66
   0   2  -1   31.86    1.65
   0  -2  -1   32.60    1.66
   0   2   1   32.90    1.66
   0  -2  -1   32.67    1.66
   0   2   1   32.88    1.65
   0   2  -1   32.40    1.64
   0  -2   1   30.81    1.65
   1   2  -1    6.10    0.41
  -1   2   1    5.66    0.36
  -1   2   1    6.68    0.36
   1  -2   1    5.64    0.36
   1  -2   1    6.56    0.40
  -1  -2  -1    6.22    0.35
   1  -2   1    5.68    0.34
  -1  -2  -1    6.06    0.32
   1   2  -1    5.90    0.36
  -1   2   1    5.54    0.36
  -1   2  -1    6.16    0.38
   1   2   1    6.00    0.32
  -1   2  -1    6.42    0.37
  -1  -2   1    6.00    0.42
   1  -2  -1    5.81    0.36
   1  -2  -1    5.83    0.36
  -1   2  -1    6.42    0.36
  -1  -2   1    5.25    0.36
   1  -2  -1    5.68    0.35
   1   2   1    6.14    0.36
   2   2  -1   60.27    3.19
   2  -2   1   59.60    3.19
  -2   2   1   61.31    3.22
   2  -2   1   61.16    3.21
   2  -2   1   61.65    3.21
   2   2  -1   61.58    3.17
  -2   2   1   62.59    3.20
  -2   2   1   62.99    3.19
  -2   2  -1   61.87    3.20
  -2   2  -1   63.99    3.20
  -2  -2   1   59.92    3.25
   2   2   1   63.49    3.20
   2   2   1   64.44    3.16
  -2   2  -1   63.02    3.22
   2  -2  -1   64.21    3.20
   2  -2  -1   65.17    3.21
   2   2   1   61.10    3.28
   2   2   1   61.15    3.17
  -3  -2  -1   34.87    1.81
  -3   2   1   35.54    1.91
   3   2  -1   32.57    1.85
   3   2  -1   35.84    1.82
   3  -2   1   34.18    1.90
   3  -2   1   35.84    1.86
   3  -2  -1   34.27    1.88
   3   2   1   34.77    1.85
   3   2   1   34.30    1.81
  -3   2  -1   36.12    1.91
   3  -2  -1   34.93    1.85
  -3  -2   1   35.12    1.94
   4  -2   1   33.72    1.82
   4   2  -1   32.49    1.76
  -4   2   1   32.11    1.88
  -4  -2  -1   32.28    1.76
  -4   2  -1   35.22    1.89
   4   2   1   32.53    1.76
  -4  -2   1   35.11    1.94
   4   2   1   33.66    1.80
   4  -2  -1   33.12    1.81
   5  -2   1   17.22    1.05
  -5   2   1   15.83    1.23
   5   2  -1   15.73    0.94
   5   2   1   14.68    0.97
   5  -2  -1   16.01    1.00
   5   2   1   16.78    0.96
  -5  -2   1   15.39    1.27
  -5   2  -1   15.40    1.20
   6  -2   1   14.97    1.05
   6   2  -1   17.76    1.04
  -6   2   1   16.31    1.30
   6  -2   1   15.72    1.11
   6   2  -1   17.33    1.07
   6   2   1   15.34    1.02
   6  -2  -1   16.32    1.11
   6   2   1   16.71    1.06
   7  -2   1    3.41    0.49
   7   2  -1    3.34    0.53
   7  -2   1    3.73    0.57
  -7   2   1    2.97    0.84
   7   2  -1    2.61    0.49
   7   2   1    2.91    0.50
   7  -2  -1    3.12    0.58
   7   2   1    3.16    0.50
   8  -2   1    3.64    0.63
   8   2  -1    4.20    0.67
   8   2  -1    4.26    0.64
   8  -2   1    3.18    0.71
   8  -2  -1    3.85    0.60
   8  -2  -1    3.07    0.63
   8   2   1    3.36    0.64
   8   2   1    2.90    0.61
   9  -2   1   -1.02    0.68
   9  -2   1   -0.42    0.60
   9  -2  -1   -0.04    0.69
   9  -2  -1    0.29    0.55
   0  -3   1   26.35    1.36
   0  -3  -1   23.38    1.33
   0  -3  -1   25.87    1.34
   0   3   1   26.66    1.34
   0   3  -1   25.90    1.34
   0  -3  -1   26.04    1.34
   0   3  -1   25.62    1.36
   0  -3   1   25.32    1.34
   0   3  -1   25.93    1.32
   0   3   1   26.67    1.35
  -1   3   1   50.37    2.59
  -1   3   1   50.73    2.60
   1  -3   1   49.56    2.60
   1  -3   1   50.35    2.57
   1   3  -1   51.03    2.63
   1  -3   1   50.14    2.62
  -1   3   1   50.58    2.60
   1   3  -1   50.44    2.59
  -1  -3  -1   50.36    2.60
   1   3  -1   52.78    2.60
  -1   3  -1   50.35    2.60
   1  -3  -1   52.22    2.61
  -1  -3   1   49.68    2.60
   1   3   1   50.28    2.60
  -1   3  -1   50.37    2.62
   1   3   1   51.28    2.57
  -1   3  -1   50.49    2.58
   1  -3  -1   50.86    2.60
   2   3  -1   13.27    0.72
   2  -3   1   13.18    0.76
  -2   3   1   12.94    0.73
  -2   3   1   13.12    0.76
  -2   3   1   12.67    0.75
   2   3  -1   12.89    0.72
   2   3  -1   12.70    0.84
   2  -3   1   12.53    0.74
   2   3   1   13.94    0.73
   2   3   1   12.00    0.85
  -2   3  -1   11.67    0.76
  -2   3  -1   12.56    0.74
   2   3   1   13.12    0.67
   2  -3  -1   13.21    0.73
  -2   3  -1   13.19    0.73
   2   3   1   12.35    0.68
  -2  -3   1   11.32    0.72
   2  -3  -1   13.60    0.75
   2  -3  -1   12.38    0.72
   3  -3   1    8.46    0.61
  -3   3   1    8.99    0.58
   3  -3   1    8.72    0.64
   3   3  -1    9.20    0.53
  -3   3   1    8.51    0.66
   3   3   1    9.02    0.56
  -3   3  -1    9.53    0.66
   3  -3  -1    9.36    0.60
   3   3   1    9.41    0.58
  -3  -3   1    9.79    0.77
  -3   3  -1    8.85    0.59
   3  -3  -1    8.80    0.64
   3   3   1    8.62    0.51
   4  -3   1   26.33    1.45
   4   3  -1   26.04    1.38
  -4   3   1   25.96    1.54
   4   3  -1   22.54    1.46
   4   3  -1   24.94    1.43
   4   3   1   24.78    1.42
   4   3   1   25.61    1.42
   4  -3  -1   26.22    1.44
  -4   3  -1   26.93    1.53
   4   3   1   26.39    1.37
   5  -3   1   15.57    1.08
   5   3  -1   17.29    1.01
  -5   3   1   18.84    1.28
   5   3  -1   16.83    1.05
   5   3   1   17.36    1.00
   5  -3  -1   16.96    1.10
   5   3   1   18.59    1.06
  -5   3  -1   15.34    1.24
  -6   3   1    3.65    0.75
   6   3  -1    3.40    0.53
   6   3  -1    3.45    0.42
   6  -3   1    3.17    0.52
   6  -3   1    3.91    0.46
   6  -3  -1    2.86    0.48
   6   3   1    3.61    0.43
   6   3   1    3.31    0.52
   7   3  -1    8.96    0.73
   7  -3   1   10.13    0.90
   7  -3   1    9.97    0.79
   7   3  -1    8.67    0.75
  -7   3   1    7.48    0.98
   7  -3  -1    6.27    0.75
   7   3   1    7.05    0.74
   7   3   1    8.35    0.72
   8  -3   1    4.22    0.65
   8   3  -1    3.49    0.66
   8  -3   1    4.55    0.72
   8   3  -1    5.70    0.71
   8  -3  -1    3.10    0.74
   8   3   1    3.34    0.61
   8  -3  -1    5.51    0.69
   9  -3   1   -0.81    0.76
   9  -3   1    0.19    0.66
   9   3  -1    0.33    0.67
   9   3   1    0.11    0.58
   9  -3  -1    0.39    0.63
   9  -3  -1   -1.15    0.77
   0   4  -1   45.57    2.27
   0  -4   1   43.85    2.27
   0   4   1   46.04    2.31
   0  -4   1   44.70    2.31
   0   4   1   42.33    2.29
   0   4  -1   45.82    2.31
   0  -4  -1   43.14    2.30
   0  -4  -1   44.69    2.30
   0  -4   1   46.07    2.32
   0   4  -1   43.96    2.32
   0   4   1   44.92    2.30
  -1  -4  -1    4.03    0.27
   1  -4   1    4.08    0.33
   1  -4   1    3.96    0.23
   1   4  -1    4.15    0.32
  -1   4   1    3.37    0.27
   1   4  -1    4.58    0.37
   1   4  -1    3.66    0.27
  -1   4   1    3.25    0.30
  -1   4   1    3.68    0.30
  -1  -4  -1    3.70    0.29
  -1   4  -1    4.52    0.33
   1  -4  -1    3.01    0.27
   1   4   1    4.02    0.27
  -1   4  -1    4.09    0.34
   1  -4  -1    3.97    0.32
  -1   4  -1    4.33    0.25
   1   4   1    4.06    0.30
  -1  -4   1    3.83    0.30
   1  -4  -1    4.43    0.32
   2   4  -1    0.08    0.15
   2  -4   1   -0.02    0.20
   2   4  -1    0.34    0.29
  -2   4   1   -0.07    0.16
   2  -4   1    0.13    0.12
   2   4  -1    0.09    0.13
  -2  -4  -1    0.05    0.11
  -2  -4  -1    0.35    0.19
  -2   4   1    0.14    0.17
   2  -4  -1    0.09    0.19
   2  -4  -1    0.22    0.14
  -2  -4   1    0.42    0.15
   2   4   1    0.06    0.11
  -2   4  -1    0.31    0.17
  -2   4  -1    0.13    0.17
   2   4   1    0.21    0.13
  -3   4   1   77.67    4.01
   3  -4   1   80.98    4.05
   3   4  -1   77.24    4.01
   3   4  -1   76.85    3.97
  -3   4   1   81.75    4.05
   3   4  -1   81.33    4.02
   3  -4  -1   75.39    4.00
   3   4   1   75.30    3.96
  -3   4  -1   77.97    4.04
   3   4   1   75.90    4.01
   3  -4  -1   76.54    4.04
  -3   4  -1   77.55    4.02
   3   4   1   76.74    3.95
   4  -4   1    1.79    0.36
   4   4  -1    1.79    0.34
   4   4  -1    2.13    0.30
  -4   4   1    2.35    0.36
  -4   4   1    1.73    0.43
   4  -4  -1    2.00    0.37
   4   4   1    2.32    0.31
   4   4   1    1.78    0.29
  -4   4  -1    1.31    0.42
   4   4   1    2.06    0.22
   5   4  -1   13.02    0.86
  -5   4   1   13.34    1.08
   5   4  -1   12.38    0.79
   5  -4   1   10.54    0.90
   5   4   1   12.32    0.78
   5   4   1   13.53    0.86
  -5   4  -1   14.22    1.05
   5  -4  -1   12.72    0.90
  -6   4   1    3.42    0.72
   6   4  -1    4.18    0.49
   6  -4   1    2.74    0.58
   6   4  -1    3.58    0.42
   6  -4   1    3.90    0.47
   6   4   1    3.81    0.49
   6   4   1    4.04    0.44
   6  -4  -1    3.97    0.54
  -7   4   1    3.24    0.79
   7  -4   1    4.77    0.70
   7   4  -1    3.70    0.57
   7  -4   1    4.51    0.56
   7   4  -1    4.10    0.53
   7   4   1    3.77    0.59
   7  -4  -1    4.44    0.67
   8  -4   1   10.28    0.90
   8   4  -1    9.84    0.92
   8  -4   1    8.67    0.96
   8   4   1    9.16    0.89
   8  -4  -1    7.93    0.95
   8  -4  -1   10.15    0.89
   9  -4   1    4.95    0.82
   9   4  -1    4.95    0.79
   9  -4  -1    4.03    0.76
   9   4   1    3.43    0.82
   9  -4  -1    3.43    1.06
   0  -5   1    5.45    0.38
   0   5   1    4.21    0.34
   0   5   1    4.25    0.34
   0   5  -1    4.39    0.29
   0   5   1    4.39    0.33
   0  -5   1    4.13    0.27
   0  -5  -1    3.73    0.32
   0   5  -1    4.64    0.37
   0   5  -1    4.80    0.34
   1  -5   1   21.92    1.11
   1  -5   1   20.81    1.20
   1   5  -1   20.50    1.22
  -1   5   1   21.39    1.19
  -1   5   1   22.55    1.18
   1   5  -1   22.42    1.15
   1   5  -1   21.44    1.17
   1   5  -1   21.19    1.18
  -1  -5  -1   21.86    1.15
  -1   5   1   22.68    1.14
  -1   5  -1   22.90    1.19
   1   5   1   23.00    1.18
   1  -5  -1   20.97    1.15
   1   5   1   19.84    1.14
   1   5   1   23.04    1.17
  -1  -5   1   20.06    1.17
  -1   5  -1   20.89    1.22
  -1   5  -1   21.48    1.12
   1  -5  -1   21.16    1.20
   2   5  -1    0.85    0.18
   2  -5   1    0.92    0.26
   2   5  -1    1.27    0.22
   2   5  -1    0.92    0.39
   2  -5   1    1.12    0.14
  -2   5   1    0.84    0.21
  -2  -5  -1    1.13    0.16
  -2   5   1    0.78    0.20
  -2  -5   1    0.75    0.19
  -2   5  -1    0.71    0.21
  -2   5  -1    1.25    0.20
   2  -5  -1    0.24    0.14
   2  -5  -1    1.33    0.26
   2   5   1    1.30    0.17
   2   5   1    1.11    0.21
  -3   5   1    7.56    0.63
  -3   5   1    7.35    0.58
   3  -5   1    7.88    0.52
   3   5  -1    7.24    0.52
   3   5  -1    7.39    0.55
   3  -5   1    8.11    0.62
   3   5   1    7.66    0.49
   3  -5  -1    7.96    0.61
   3  -5  -1    7.18    0.54
  -3   5  -1    7.40    0.58
   3   5   1    8.58    0.57
   3   5   1    7.41    0.45
  -3  -5   1    7.48    0.54
  -3   5  -1    7.69    0.61
   4   5  -1    3.39    0.41
   4  -5   1    4.19    0.49
  -4   5   1    3.38    0.52
  -4   5   1    4.91    0.48
   4   5  -1    3.66    0.44
   4   5   1    4.24    0.33
   4  -5  -1    3.77    0.46
   4   5   1    4.39    0.43
  -4   5  -1    3.48    0.42
  -4   5  -1    4.01    0.52
  -5   5   1   28.90    1.87
   5   5  -1   31.02    1.67
   5   5  -1   32.32    1.75
   5  -5   1   30.18    1.83
  -5   5  -1   29.76    1.89
   5   5   1   29.74    1.75
   5  -5  -1   33.14    1.82
  -6   5   1    4.24    0.80
   6  -5   1    4.31    0.64
   6  -5   1    5.34    0.54
   6   5  -1    5.48    0.50
   6   5  -1    5.52    0.59
   6   5   1    5.17    0.57
   6  -5  -1    7.18    0.73
  -7   5   1    8.62    1.11
   7  -5   1    9.62    0.93
   7  -5   1   10.07    0.90
   7   5  -1   10.94    0.92
   7  -5  -1    8.68    0.94
   7   5   1    9.41    0.88
   8   5  -1    2.49    0.65
   8  -5   1    0.72    0.74
   8  -5   1    1.99    0.59
   8   5   1    1.86    0.63
   8  -5  -1    2.31    0.71
   8  -5  -1    2.27    0.61
   9   5  -1    3.98    0.84
   9  -5   1    3.97    1.03
   9   5   1    2.54    0.80
   9  -5  -1    4.20    0.93
   9  -5  -1    2.80    0.76
   0   6  -1   62.75    3.30
   0  -6  -1   65.16    3.28
   0   6   1   63.57    3.29
   0   6   1   64.08    3.27
   0   6   1   61.71    3.28
   0   6  -1   62.26    3.24
   0   6  -1   65.12    3.29
   1   6  -1   14.81    0.94
  -1   6   1   15.91    0.87
   1   6  -1   15.71    0.86
   1  -6   1   14.49    0.77
  -1  -6  -1   14.73    0.84
  -1   6   1   14.59    0.81
   1   6  -1   14.88    0.83
   1  -6   1   13.79    0.91
   1   6  -1   13.92    0.88
  -1  -6  -1   14.92    0.85
   1   6   1   13.88    0.84
  -1   6  -1   15.76    0.88
   1  -6  -1   14.79    0.83
   1   6   1   15.66    0.86
   1   6   1   15.86    0.87
   1  -6  -1   14.93    0.90
  -1   6  -1   14.83    0.78
  -1  -6   1   14.07    0.87
   2  -6   1   22.69    1.22
  -2   6   1   22.53    1.26
   2   6  -1   25.03    1.27
   2   6  -1   23.25    1.28
  -2   6   1   22.34    1.29
  -2  -6  -1   22.81    1.23
   2  -6   1   23.23    1.35
  -2   6  -1   24.05    1.30
   2  -6  -1   23.75    1.33
   2   6   1   23.22    1.23
  -2  -6   1   22.52    1.26
   2  -6  -1   22.46    1.25
  -2   6  -1   23.18    1.24
   2   6   1   22.86    1.28
   3   6  -1   21.59    1.22
   3  -6   1   23.92    1.34
  -3   6   1   21.63    1.27
   3   6  -1   21.63    1.23
  -3   6   1   23.94    1.25
   3  -6   1   22.03    1.18
  -3   6  -1   20.74    1.24
   3   6   1   22.90    1.15
   3   6   1   20.27    1.24
   3   6   1   21.30    1.17
  -3  -6   1   21.06    1.22
  -3   6  -1   20.66    1.25
   3  -6  -1   20.50    1.28
   4   6  -1    6.20    0.54
  -4   6   1    5.33    0.62
  -4   6   1    7.29    0.59
   4  -6   1    5.43    0.60
   4  -6  -1    6.26    0.64
  -4   6  -1    4.96    0.63
  -4   6  -1    6.44    0.57
   4   6   1    6.14    0.42
   4   6   1    5.43    0.53
  -5   6   1   11.52    0.95
   5  -6   1    8.78    0.84
   5   6  -1    9.80    0.69
   5   6  -1   11.65    0.83
  -5   6  -1   10.06    0.90
   5   6   1   11.56    0.84
   5  -6  -1   10.83    0.87
   6  -6   1    9.95    0.96
   6   6  -1    9.99    0.84
  -6   6   1   12.03    1.08
   6  -6   1   10.96    0.82
   6  -6  -1    9.79    0.91
   6   6   1   10.77    0.86
  -7   6   1    3.43    0.91
   7   6  -1    2.80    0.60
   7  -6   1    2.33    0.66
   7  -6  -1    2.69    0.71
   7   6   1    2.31    0.54
   8   6  -1    6.06    0.78
   8  -6   1    3.29    0.89
   8  -6  -1    5.85    0.90
   8   6   1    4.88    0.79
   8  -6  -1    6.84    0.81
   9   6  -1    1.27    0.71
   9  -6   1    1.52    1.01
   9  -6  -1   -0.02    0.94
   9   6   1    0.91    0.78
   0   7   1    1.50    0.24
   0   7  -1    1.61    0.29
   0   7  -1    1.56    0.21
   0  -7   1    1.89    0.32
   0  -7  -1    1.82    0.30
   0  -7  -1    1.03    0.26
   0   7   1    1.84    0.30
   0   7  -1    1.95    0.29
   0   7   1    1.94    0.31
   1   7  -1    5.38    0.55
   1  -7   1    5.01    0.32
   1   7  -1    6.08    0.47
   1   7  -1    5.71    0.41
   1  -7   1    5.91    0.50
  -1  -7  -1    5.09    0.42
  -1  -7  -1    5.60    0.42
  -1   7   1    4.94    0.44
   1   7  -1    5.39    0.48
  -1   7   1    5.47    0.38
   1  -7  -1    4.65    0.47
   1   7   1    5.94    0.44
   1  -7  -1    4.99    0.38
  -1   7  -1    5.37    0.34
   1   7   1    6.18    0.48
  -1   7  -1    5.63    0.46
  -1  -7   1    4.84    0.44
   1   7   1    5.62    0.43
  -2   7   1   24.53    1.38
   2  -7   1   29.08    1.48
  -2   7   1   25.91    1.44
  -2  -7  -1   25.22    1.36
   2  -7   1   25.08    1.32
   2   7  -1   23.83    1.40
   2   7  -1   26.67    1.39
   2   7  -1   24.92    1.40
  -2   7  -1   24.89    1.35
   2  -7  -1   24.41    1.38
   2   7   1   25.46    1.41
   2   7   1   24.14    1.36
  -2  -7   1   26.22    1.40
  -2   7  -1   26.14    1.43
   2   7   1   24.00    1.40
   2  -7  -1   25.31    1.47
  -3   7   1   -0.03    0.31
   3  -7   1    1.06    0.41
  -3   7   1    0.45    0.30
   3   7  -1    0.39    0.24
  -3   7  -1   -0.05    0.29
  -3   7  -1    0.20    0.30
  -3  -7   1    0.10    0.28
   3  -7  -1    0.78    0.39
   3   7   1    0.23    0.25
  -4   7   1   53.13    2.74
   4  -7   1   45.92    2.72
  -4   7   1   47.06    2.67
   4   7  -1   50.12    2.59
   4   7  -1   47.97    2.66
   4  -7  -1   52.37    2.75
   4   7   1   50.62    2.68
  -4   7  -1   51.62    2.72
  -4   7  -1   48.09    2.68
   5  -7   1   13.06    1.08
   5   7  -1   17.13    1.36
  -5   7   1   13.80    1.01
  -5   7   1   15.16    1.14
   5   7   1   14.37    1.10
   5  -7  -1   14.99    1.08
  -5   7  -1   14.25    1.06
  -5   7  -1   12.75    1.19
  -6   7   1    2.46    0.78
   6   7  -1    2.38    0.49
   6  -7   1    3.21    0.69
   6   7   1    3.58    0.56
   6  -7  -1    3.16    0.67
   7  -7   1    8.38    0.94
   7   7  -1    6.85    0.80
   7  -7  -1    5.82    0.85
   7   7   1    7.30    0.82
   8  -7   1    3.01    1.03
   8  -7  -1    2.35    0.82
   0  -8   1   30.50    1.60
   0   8  -1   26.59    1.48
   0  -8  -1   27.46    1.57
   0   8  -1   27.08    1.56
   0   8   1   28.09    1.52
   0   8   1   29.60    1.58
  -1  -8  -1   22.63    1.28
   1   8  -1   21.68    1.24
   1   8  -1   22.88    1.20
  -1   8   1   20.70    1.24
   1  -8   1   21.75    1.30
  -1   8   1   21.03    1.16
   1   8   1   19.75    1.22
  -1   8  -1   20.33    1.24
  -1   8  -1   20.41    1.12
  -1  -8   1   21.89    1.25
   1   8   1   23.67    1.26
   1  -8  -1   20.64    1.27
  -2   8   1    0.14    0.31
   2   8  -1    0.74    0.26
  -2  -8  -1    0.98    0.25
   2   8  -1    0.39    0.29
   2  -8   1    1.26    0.42
  -2   8   1    0.92    0.27
   2   8   1    1.09    0.31
   2   8   1    0.79    0.28
  -2  -8   1    0.84    0.30
  -2   8  -1    0.72    0.31
   2  -8  -1    1.03    0.40
   3  -8   1    5.66    0.69
  -3   8   1    7.54    0.65
   3   8  -1    6.91    0.56
  -3   8   1    5.99    0.58
  -3   8  -1    6.22    0.61
  -3  -8   1    7.37    0.56
   3  -8  -1    7.18    0.68
   3   8   1    8.02    0.62
  -4   8   1    9.29    0.74
   4  -8   1    9.24    0.85
   4   8  -1    8.78    0.71
  -4   8  -1    8.74    0.75
   4   8   1    9.44    0.77
   4  -8  -1    9.15    0.81
   5  -8   1   19.11    1.37
  -5   8   1   19.19    1.28
   5   8  -1   18.15    1.24
   5   8   1   21.46    1.27
   5  -8  -1   20.00    1.37
  -5   8  -1   20.56    1.29
   6  -8   1    5.98    0.81
   6   8  -1    5.54    0.64
   6  -8  -1    4.99    0.80
   6   8   1    4.15    0.61
   7   8  -1    0.40    0.51
   7  -8   1    0.91    0.78
   7   8   1    0.34    0.59
   7  -8  -1    0.33    0.68
   8   8  -1    1.38    0.70
   8  -8   1    0.67    0.92
   8   8   1    1.24    0.67
   8  -8  -1   -0.01    0.93
   0  -9  -1    0.54    0.36
   0   9   1    0.22    0.25
   0   9   1    0.13    0.32
   0   9  -1   -0.18    0.24
   0   9  -1   -0.16    0.30
   0  -9   1   -0.10    0.36
   1   9  -1   94.48    5.01
  -1   9   1   96.68    5.03
   1   9  -1   96.41    4.96
   1  -9   1   98.12    5.05
  -1   9   1   93.91    4.94
  -1  -9  -1   97.11    4.98
  -1   9  -1   97.41    5.03
   1   9   1   93.46    4.98
  -1  -9   1   98.18    5.01
   1   9   1  101.04    5.03
   1  -9  -1   97.33    5.04
   2  -9   1   13.97    1.04
   2   9  -1   14.73    0.92
   2   9  -1   14.42    0.91
  -2  -9  -1   14.91    0.87
  -2   9   1   12.60    0.93
  -2   9  -1   12.50    0.93
  -2  -9   1   13.12    0.92
   2   9   1   13.99    0.92
   2   9   1   14.14    0.92
   2  -9  -1   12.74    1.03
   3  -9   1   25.78    1.84
   3   9  -1   27.69    1.59
  -3   9   1   27.08    1.62
   3   9  -1   29.52    1.60
  -3  -9   1   27.30    1.59
   3   9   1   28.08    1.62
   3  -9  -1   29.52    1.71
   3   9   1   27.74    1.59
  -3   9  -1   25.84    1.60
   4  -9   1    2.52    0.58
   4   9  -1    2.11    0.44
  -4   9   1    3.38    0.50
   4   9   1    2.76    0.48
   4  -9  -1    2.36    0.60
  -4   9  -1    1.10    0.43
   5   9  -1    9.26    0.81
   5  -9   1    8.82    0.97
  -5   9   1    7.86    0.82
   5  -9  -1    8.29    0.89
   5   9   1    7.77    0.78
  -5   9  -1    9.46    0.83
   6  -9   1    0.38    0.65
   6   9  -1    0.27    0.51
  -6   9   1   -0.01    0.56
   6  -9  -1    0.50    0.64
   6   9   1    0.07    0.48
   7   9  -1   12.15    1.08
   7   9   1   12.10    1.08
   8   9  -1   -0.10    0.76
   8  -9   1   -0.30    0.97
   8   9   1    0.46    0.77
   8  -9  -1    0.06    0.95
   0 -10  -1    8.77    0.72
   0  10   1    9.79    0.75
   0 -10   1    8.94    0.75
   0  10  -1    9.09    0.76
   1  10  -1    9.12    0.78
   1 -10   1   11.47    0.86
  -1 -10  -1   10.38    0.79
  -1  10   1   11.51    0.85
   1  10   1    9.39    0.78
   1  10   1   11.12    0.82
  -1  10  -1   11.36    0.81
  -1 -10   1   10.63    0.82
   1 -10  -1   10.01    0.83
   2 -10   1    7.04    0.73
  -2  10   1    6.50    0.64
   2  10  -1    5.38    0.55
   2  10  -1    5.73    0.62
   2  10   1    5.53    0.59
   2  10   1    5.81    0.58
  -2 -10   1    6.66    0.58
   2 -10  -1    5.81    0.69
  -2  10  -1    6.20    0.60
   3  10  -1   17.03    1.15
   3  10  -1   17.89    1.17
  -3  10   1   17.41    1.17
   3 -10   1   16.48    1.30
   3  10   1   18.27    1.18
   3 -10  -1   18.06    1.31
  -3  10  -1   18.44    1.22
   3  10   1   19.38    1.20
   4  10  -1   -0.01    0.42
   4  10  -1    0.38    0.42
   4 -10   1    0.23    0.61
  -4  10   1    0.42    0.44
  -4  10  -1    0.36    0.43
   4 -10  -1   -0.16    0.59
   4  10   1    0.18    0.38
   5  10  -1   18.06    1.22
  -5  10   1   14.50    1.19
   5 -10   1   15.96    1.31
   5 -10  -1   17.22    1.32
  -5  10  -1   15.55    1.19
   5  10   1   14.15    1.20
   6 -10   1    0.45    0.78
  -6  10   1    0.19    0.56
   6  10  -1    0.24    0.58
   6  10   1    0.20    0.62
   6 -10  -1    0.26    0.78
  -6  10  -1    0.72    0.65
   7  10  -1   -0.44    0.65
   7 -10   1    0.83    0.93
   7  10   1    0.16    0.78
   7 -10  -1    0.31    0.83
   0 -11   1    5.73    0.64
   0  11  -1    5.02    0.59
   0 -11  -1    5.80    0.62
   0  11   1    5.64    0.62
   1 -11   1    2.72    0.57
   1  11  -1    2.80    0.48
  -1  11   1    2.96    0.50
  -1 -11   1    3.30    0.52
   1 -11  -1    3.09    0.58
   1  11   1    3.56    0.49
  -1  11  -1    4.06    0.56
   2 -11   1    7.42    0.81
  -2  11   1    8.70    0.76
   2  11  -1    7.13    0.68
   2 -11  -1    8.65    0.90
   2  11   1    6.92    0.68
  -2  11  -1    6.83    0.70
   3 -11   1    0.37    0.55
  -3  11   1    0.34    0.43
   3  11  -1    0.46    0.41
   3  11   1    0.19    0.48
   3  11   1    0.55    0.43
  -3  11  -1    0.56    0.47
   3 -11  -1    0.82    0.58
   4  11  -1   12.60    1.16
   4 -11   1   11.00    1.11
   4  11  -1   12.13    1.01
  -4  11   1   13.18    1.03
   4 -11  -1   13.37    1.18
  -4  11  -1   16.53    1.13
   4  11   1   13.21    1.01
   4  11   1   12.48    1.04
   5 -11   1    1.32    0.71
  -5  11   1    1.32    0.57
   5  11  -1    0.58    0.58
   5  11  -1    1.04    0.56
   5  11   1    0.91    0.61
   5 -11  -1    0.83    0.74
   5  11   1    1.56    0.58
  -5  11  -1    0.91    0.56
   6 -11   1   -1.07    0.84
  -6  11   1   -1.00    0.59
   6  11  -1   -0.49    0.64
   6 -11  -1   -0.28    0.83
  -6  11  -1   -0.06    0.60
   6  11   1   -0.22    0.65
   7 -11   1    0.54    0.90
   7  11  -1    1.28    0.82
   7  11   1    0.60    0.79
   7 -11  -1    3.18    0.99
   0  12  -1   10.75    0.90
   0 -12   1   12.58    0.97
   0  12   1   10.86    0.94
   1  12  -1    3.22    0.54
   1 -12   1    2.31    0.62
  -1  12   1    2.70    0.56
  -1  12  -1    1.78    0.52
   1  12   1    2.25    0.53
   1 -12  -1    2.68    0.61
  -2  12   1    9.26    0.84
   2 -12   1    9.91    0.95
   2  12  -1    9.03    0.81
   2 -12  -1    9.78    0.94
  -2  12  -1    8.44    0.81
   2  12   1    8.13    0.78
  -3  12   1    1.66    0.53
   3  12  -1    1.45    0.51
   3 -12   1    0.98    0.70
   3 -12  -1    0.88    0.68
   3  12   1    2.29    0.56
  -3  12  -1    1.28    0.53
  -4  12   1    1.55    0.58
   4  12  -1    1.48    0.60
   4 -12   1    0.75    0.75
   4 -12  -1    0.85    0.74
   4  12   1    1.06    0.55
  -4  12  -1    1.89    0.58
  -5  12   1    1.64    0.78
   5 -12   1    1.56    0.84
   5  12   1    2.95    0.71
  -5  12  -1    2.16    0.68
   5 -12  -1    1.05    0.85
   6 -12   1    2.68    1.03
  -6  12   1    2.84    0.85
   6  12  -1    5.42    0.85
  -6  12  -1    3.80    0.89
   6  12   1    4.77    0.84
   6 -12  -1    3.93    1.08
   0  13  -1    0.63    0.50
   0  13   1    0.31    0.49
  -1  13   1    5.94    0.76
   1  13  -1    6.22    0.71
   1 -13   1    6.38    0.83
   1  13   1    4.20    0.66
  -1  13  -1    4.37    0.67
   2  13  -1    0.83    0.52
  -2  13   1    1.16    0.54
   2 -13   1    1.32    0.71
   2  13   1    0.29    0.50
  -2  13  -1    1.51    0.55
   2 -13  -1    2.00    0.74
   3 -13   1   -0.18    0.75
  -3  13   1    0.33    0.56
   3  13  -1   -0.17    0.57
   3 -13  -1    1.07    0.76
   3  13   1    0.86    0.61
  -3  13  -1    0.16    0.57
   4  13  -1    0.22    0.64
   4 -13   1    0.18    0.86
  -4  13   1    1.05    0.67
  -4  13  -1    1.92    0.66
   4 -13  -1    1.17    0.87
   4  13   1    1.00    0.65
  -5  13   1    1.20    0.71
   5  13  -1    2.57    0.77
   5 -13   1    2.18    1.02
  -5  13  -1    1.30    0.78
   5  13   1    1.78    0.69
   5 -13  -1    2.07    0.96
   0  14  -1    1.96    0.65
   0  14   1    2.62    0.63
   1  14  -1   -0.17    0.61
   2  14  -1    0.63    0.60
  -2  14   1   -0.26    0.58
   2 -14   1    1.16    0.79
   2  14   1    0.15    0.57
  -2  14  -1    1.24    0.62
   3  14  -1    1.96    0.67
  -3  14   1    1.74    0.76
   3 -14   1    1.38    0.89
   3 -14  -1    3.06    0.93
  -3  14  -1    1.23    0.71
   3  14   1    2.29    0.67
   4 -14   1   -0.20    0.92
   4  14  -1   -0.45    0.71
  -4  14   1    0.71    0.70
   4  14   1   -0.25    0.71
   4 -14  -1   -0.06    0.97
  -4  14  -1   -0.26    0.76
   0  15  -1   -0.62    0.63
   0  15   1   -0.29    0.63
  -1  15   1    1.72    0.71
   1  15  -1    1.50    0.69
  -1  15  -1    2.00    0.73
   1  15   1    1.57    0.70
  -2  15   1    2.71    0.81
   2  15  -1    2.14    0.80
  -2  15  -1    2.71    0.81
   2  15   1    1.82    0.81
   0   0  -2   49.21    2.52
   0   0  -2   49.88    2.52
  -1   0  -2   21.10    1.09
   1   0  -2   21.53    1.11
   1   0  -2   20.86    1.09
  -1   0   2   21.01    1.11
  -1   0  -2   20.99    1.09
   1   0   2   21.48    1.09
   1   0   2   21.00    1.09
   1   0  -2   20.54    1.11
   2   0  -2  257.34   12.90
   2   0   2  257.02   12.90
  -2   0   2  259.04   12.95
  -2   0  -2  251.55   12.89
  -2   0   2  253.40   12.90
   2   0  -2  250.13   12.94
   2   0   2  257.86   12.90
  -3   0   2   11.38    0.69
  -3   0  -2   11.21    0.67
   3   0   2   11.90    0.68
  -3   0   2   12.08    0.79
   3   0   2   11.24    0.80
   3   0  -2   11.38    0.67
   3   0  -2   11.35    0.83
  -4   0   2   35.79    1.88
   4   0  -2   30.39    1.71
   4   0   2   32.12    1.73
   4   0   2   31.03    1.72
   5   0   2    0.56    0.25
   5   0  -2    0.20    0.23
   5   0   2    0.17    0.28
  -5   0   2    0.09    0.52
  -6   0   2    0.53    0.66
   6   0  -2    0.60    0.34
   6   0   2   -0.12    0.32
   6   0   2    0.55    0.31
   7   0  -2   -0.07    0.39
   7   0   2   -0.50    0.41
   7   0   2   -0.14    0.39
  -7   0   2    0.37    0.69
   8   0   2   36.15    2.05
   8   0  -2   34.21    2.07
   8   0   2   30.46    2.09
   8   0  -2   36.45    2.06
   9   0   2    1.08    0.67
   9   0   2    0.83    0.74
   9   0  -2    0.90    0.66
   9   0  -2    1.07    0.71
   0   1  -2    0.07    0.07
   0  -1  -2    0.03    0.04
   0   1  -2    0.11    0.04
   0  -1   2    0.02    0.03
   0   1  -2    0.07    0.04
   0  -1  -2    0.08    0.07
   1  -1   2    9.96    0.54
   1   1  -2    9.55    0.55
  -1  -1  -2    9.97    0.50
   1  -1   2    9.61    0.51
  -1   1   2   10.33    0.51
  -1   1   2    9.77    0.54
  -1   1   2   10.22    0.52
   1   1  -2    9.22    0.53
   1  -1   2    9.32    0.52
  -1  -1  -2    9.72    0.52
  -1  -1   2    8.47    0.53
   1   1   2    9.66    0.50
   1   1   2    9.38    0.52
  -1  -1   2    8.15    0.55
   1  -1  -2    9.52    0.51
  -1   1  -2    8.97    0.52
  -1   1  -2    9.28    0.54
  -1   1  -2    8.92    0.51
   1  -1  -2    9.78    0.52
   1  -1  -2   10.21    0.53
   2   1  -2   78.17    4.09
  -2   1   2   78.18    4.06
  -2  -1  -2   78.93    4.06
  -2   1   2   79.85    4.08
   2  -1   2   79.84    4.03
   2   1  -2   78.19    4.04
   2  -1   2   76.31    4.07
   2  -1   2   77.03    4.04
   2  -1   2   81.59    4.05
   2   1  -2   76.59    4.06
   2   1   2   82.64    4.02
  -2   1  -2   79.23    4.04
   2  -1  -2   81.02    4.05
   2   1   2   82.32    4.05
   2  -1  -2   78.82    4.03
   2  -1  -2   78.13    4.07
  -2  -1   2   78.71    4.10
   3   1  -2   14.08    0.76
   3  -1   2   13.26    0.79
  -3  -1  -2   14.14    0.75
   3  -1   2   13.28    0.76
   3  -1   2   13.39    0.89
  -3   1   2   14.31    0.93
   3  -1  -2   12.75    0.79
   3  -1  -2   14.22    0.77
   3   1   2   13.33    0.75
   3  -1  -2   13.26    0.88
   3   1   2   13.70    0.78
  -3  -1   2   13.58    0.89
  -3   1  -2   12.41    0.78
  -3  -1   2   12.52    0.76
   4   1  -2    1.98    0.26
  -4  -1  -2    3.84    0.30
   4  -1   2    1.53    0.25
  -4   1   2    2.11    0.43
   4  -1   2    2.20    0.29
  -4  -1   2    1.38    0.43
   4  -1  -2    2.46    0.28
   4   1   2    2.18    0.29
   5  -1   2   19.34    1.16
   5  -1   2   18.98    1.18
   5   1  -2   18.81    1.13
  -5   1   2   18.96    1.40
   5  -1  -2   20.63    1.16
  -5  -1   2   20.29    1.38
   5   1   2   20.46    1.16
   5   1   2   19.50    1.15
   6  -1   2   16.49    1.07
   6  -1   2   15.78    1.11
  -6   1   2   18.74    1.40
   6   1  -2   18.38    1.07
   6   1   2   15.22    1.08
   6   1   2   15.10    1.07
   6  -1  -2   17.27    1.07
  -6  -1   2   17.89    1.36
   7  -1   2    3.95    0.53
   7   1  -2    5.06    0.63
  -7   1   2    5.10    0.93
  -7  -1   2    3.84    0.90
   7  -1  -2    4.81    0.57
   7   1   2    4.43    0.56
   7   1   2    3.94    0.56
   8  -1   2    1.15    0.61
   8   1  -2    0.71    0.48
   8  -1   2    0.59    0.51
   8   1  -2    0.81    0.53
   8   1   2    0.19    0.55
   8   1   2    0.48    0.54
   8  -1  -2    1.20    0.53
   8  -1  -2    0.78    0.46
   9   1  -2    1.44    0.70
   9   1  -2    1.30    0.68
   9  -1   2    1.20    0.61
   9  -1   2    1.49    0.80
   9  -1  -2    1.12    0.69
   9  -1  -2    1.75    0.68
   9   1   2    0.93    0.67
   0  -2   2    1.14    0.16
   0   2   2    1.31    0.13
   0   2   2    1.80    0.17
   0   2  -2    1.18    0.15
   0   2   2    1.50    0.11
   0  -2  -2    1.36    0.12
   0   2  -2    1.38    0.11
   0  -2  -2    1.75    0.16
   0  -2   2    1.50    0.12
   0  -2   2    1.42    0.12
   0   2  -2    1.41    0.12
   1   2  -2  288.41   14.43
   1  -2   2  285.42   14.41
  -1   2   2  286.42   14.42
  -1  -2  -2  284.59   14.43
   1  -2   2  291.93   14.44
   1   2  -2  286.56   14.44
   1  -2  -2  284.60   14.43
  -1   2  -2  287.46   14.44
   1   2   2  283.79   14.43
  -1  -2   2  276.94   14.45
   2  -2   2    4.47    0.33
  -2   2   2    3.90    0.36
   2  -2   2    5.19    0.37
  -2   2   2    4.60    0.33
   2   2  -2    4.33    0.43
   2  -2   2    4.56    0.29
   2  -2   2    4.32    0.35
  -2  -2  -2    4.71    0.33
  -2   2   2    4.86    0.35
  -2  -2  -2    4.21    0.26
   2   2  -2    4.50    0.34
  -2   2  -2    4.27    0.33
   2  -2  -2    4.37    0.33
  -2  -2   2    4.60    0.35
   2   2   2    4.76    0.27
  -2   2  -2    4.05    0.34
   2  -2  -2    4.91    0.33
  -2  -2   2    4.50    0.40
   2  -2  -2    3.78    0.34
   3  -2   2   12.06    0.85
   3   2  -2   12.78    0.74
   3  -2   2   11.89    0.78
   3  -2   2   12.82    0.74
   3   2  -2   11.25    0.79
   3   2   2   13.21    0.77
   3  -2  -2   14.35    0.78
   3  -2  -2   13.88    0.82
   3   2   2   13.81    0.72
  -3  -2   2   13.80    0.92
   4  -2   2   46.98    2.47
  -4   2   2   44.87    2.57
   4  -2   2   48.58    2.51
  -4  -2  -2   45.85    2.44
   4   2  -2   47.60    2.46
   4   2   2   47.99    2.45
   4  -2  -2   46.25    2.49
   4   2   2   46.59    2.49
  -4  -2   2   48.45    2.64
   5  -2   2    6.66    0.52
   5  -2   2    5.60    0.55
   5   2  -2    6.79    0.53
  -5   2   2    6.16    0.76
   5  -2  -2    5.85    0.53
   5   2   2    5.85    0.49
  -5  -2   2    6.32    0.78
   5   2   2    6.40    0.54
   6   2  -2    8.45    0.66
  -6   2   2    8.47    0.96
   6  -2   2    6.57    0.68
   6  -2   2    8.21    0.66
   6   2   2    8.39    0.65
   6  -2  -2    7.40    0.71
   6   2   2    9.47    0.78
   7  -2   2    0.43    0.40
  -7   2   2    1.12    0.70
   7  -2   2    0.05    0.48
   7   2  -2    1.05    0.42
   7   2  -2    0.31    0.38
   7  -2  -2    0.52    0.48
   7   2   2    0.19    0.40
   7   2   2    0.23    0.43
   8   2  -2    2.71    0.60
   8  -2   2    3.01    0.72
  -8   2   2    1.77    0.97
   8   2  -2    2.13    0.58
   8  -2   2    2.20    0.54
   8   2   2    2.47    0.61
   8  -2  -2    2.23    0.66
   9  -2   2    4.82    0.89
   9  -2   2    3.90    0.72
   9   2  -2    4.00    1.20
   9   2  -2    5.85    1.33
   9  -2  -2    4.41    0.77
   9  -2  -2    4.30    0.83
   0  -3   2    2.69    0.24
   0   3  -2    2.59    0.26
   0   3   2    1.91    0.19
   0  -3   2    3.14    0.21
   0   3   2    2.04    0.17
   0   3  -2    2.52    0.20
   0  -3  -2    2.32    0.21
   0   3   2    3.07    0.24
   0  -3  -2    2.53    0.20
   0   3  -2    2.06    0.15
   0   3  -2    2.62    0.18
   1   3  -2  192.39    9.83
  -1   3   2  201.95    9.81
   1  -3   2  181.28    9.81
  -1  -3  -2  189.11    9.81
   1  -3   2  191.87    9.77
   1  -3   2  193.84    9.78
  -1   3   2  193.34    9.81
  -1   3   2  190.04    9.81
   1   3  -2  196.74    9.82
   1  -3   2  198.00    9.83
  -1  -3  -2  191.02    9.77
   1   3   2  193.60    9.77
   1  -3  -2  196.39    9.81
  -1  -3   2  197.31    9.82
   1   3   2  193.56    9.82
   1  -3  -2  195.65    9.81
   1  -3  -2  197.69    9.81
  -1  -3   2  198.69    9.84
  -1   3  -2  190.66    9.81
  -2   3   2   21.76    1.17
   2  -3   2   19.66    1.24
   2  -3   2   22.24    1.13
   2  -3   2   23.25    1.16
   2   3  -2   21.92    1.17
  -2   3   2   22.84    1.16
  -2  -3  -2   21.91    1.17
   2  -3   2   21.70    1.16
   2   3  -2   23.11    1.24
  -2   3   2   21.83    1.19
  -2   3  -2   19.19    1.18
  -2   3  -2   20.31    1.16
   2  -3  -2   20.98    1.16
   2   3   2   21.47    1.11
   2   3   2   21.40    1.10
   2  -3  -2   22.02    1.18
   2   3   2   23.04    1.17
   2  -3  -2   20.87    1.16
  -2  -3   2   19.40    1.22
  -2  -3   2   21.31    1.17
   3  -3   2   12.81    0.80
   3  -3   2   11.97    0.66
   3  -3   2   11.61    0.73
  -3   3   2   11.47    0.71
   3   3  -2   11.14    0.72
   3   3  -2   11.42    0.66
   3  -3  -2   12.04    0.76
   3   3   2   10.28    0.69
   3  -3  -2   12.05    0.71
   3   3   2   10.78    0.65
   3   3   2   11.46    0.63
  -3   3  -2   11.50    0.71
  -3  -3   2    9.66    0.85
   4   3  -2    1.34    0.22
   4  -3   2    1.34    0.23
  -4   3   2    2.33    0.46
   4  -3   2    0.95    0.29
   4   3   2    1.47    0.21
   4   3   2    0.90    0.43
  -4  -3   2    0.63    0.43
   4  -3  -2    0.95    0.27
   4   3   2    1.11    0.26
  -5   3   2    6.68    0.75
   5   3  -2    7.60    0.57
   5  -3   2    6.96    0.58
   5  -3   2    7.91    0.69
  -5  -3   2    8.03    0.85
   5  -3  -2    7.60    0.63
   5   3   2    7.65    0.56
   5   3   2    8.35    0.62
  -6   3   2   11.30    1.06
   6   3  -2   10.25    0.82
   6   3  -2   11.44    0.81
   6  -3   2   11.13    0.82
   6  -3   2   13.02    0.94
   6   3   2   11.72    0.84
   6   3   2   11.18    0.81
   7  -3   2    1.79    0.46
   7  -3   2    2.67    0.60
   7   3  -2    2.27    0.46
   7   3  -2    2.98    0.52
  -7   3   2    2.98    0.82
   7  -3  -2    2.65    0.53
   7   3   2    1.64    0.45
   7   3   2    2.12    0.51
  -8   3   2    6.25    1.14
   8   3  -2    5.07    0.69
   8   3  -2    5.33    0.74
   8  -3   2    5.21    0.77
   8  -3   2    5.91    0.72
   8   3   2    5.37    0.73
   8  -3  -2    3.91    0.71
   9   3  -2    4.56    0.78
   9  -3   2    5.85    0.96
   9  -3   2    4.21    0.80
   9  -3  -2    4.61    0.90
   9  -3  -2    4.77    0.80
   9   3   2    3.64    0.76
   0  -4   2  123.25    6.24
   0  -4   2  117.42    6.22
   0  -4  -2  121.44    6.22
   0   4  -2  121.95    6.20
   0   4   2  120.56    6.20
   0  -4  -2  124.37    6.21
   0   4  -2  121.49    6.18
   0   4   2  123.39    6.22
   0   4   2  125.71    6.23
   0   4  -2  124.83    6.22
  -1   4   2    6.75    0.42
   1   4  -2    6.82    0.40
   1  -4   2    6.36    0.45
  -1   4   2    6.75    0.43
  -1  -4  -2    6.15    0.38
   1   4  -2    6.90    0.46
   1   4  -2    6.42    0.42
  -1   4   2    5.85    0.46
   1  -4   2    6.77    0.47
   1   4  -2    6.91    0.50
   1  -4  -2    7.03    0.43
   1  -4  -2    6.85    0.45
   1   4   2    7.33    0.45
   1   4   2    6.96    0.38
   1  -4  -2    6.44    0.44
  -1   4  -2    6.41    0.48
  -1  -4   2    6.74    0.45
  -1   4  -2    7.43    0.45
  -2   4   2   13.31    0.75
  -2  -4  -2   11.86    0.74
   2  -4   2   12.93    0.71
  -2   4   2   12.36    0.75
   2   4  -2   13.46    0.87
   2   4  -2   13.12    0.72
   2   4  -2   13.13    0.76
   2  -4   2   12.03    0.78
  -2   4  -2   12.39    0.75
  -2  -4   2   13.28    0.84
   2   4   2   12.85    0.66
   2   4   2   12.68    0.67
  -2  -4   2   12.21    0.75
   2  -4  -2   13.53    0.73
   2  -4  -2   11.97    0.76
   2   4   2   13.16    0.79
  -3   4   2    7.97    0.54
   3   4  -2    7.84    0.57
   3  -4   2    7.17    0.59
   3  -4  -2    7.20    0.56
  -3   4  -2    8.86    0.57
  -3   4  -2    7.52    0.59
  -3  -4   2    8.35    0.68
   3  -4  -2    8.33    0.57
   3   4   2    8.04    0.47
   3   4   2    6.97    0.55
   3   4   2    7.85    0.44
   4   4  -2    7.55    0.60
   4  -4   2    9.15    0.69
  -4   4   2    8.98    0.64
   4  -4   2    8.65    0.57
   4   4  -2    8.12    0.56
  -4   4   2    9.30    0.76
   4   4   2    8.74    0.58
   4   4   2    8.55    0.53
   4  -4  -2    8.16    0.66
   4   4   2    9.76    0.63
   5   4  -2    6.15    0.50
  -5   4   2    6.21    0.77
   5  -4   2    7.41    0.58
   5   4  -2    8.24    0.63
   5  -4   2    6.17    0.64
   5   4   2    6.71    0.59
   5  -4  -2    6.40    0.61
   5   4   2    7.11    0.53
   6  -4   2    3.18    0.43
   6  -4   2    2.11    0.54
  -6   4   2    1.33    0.60
   6   4  -2    2.01    0.36
   6   4  -2    2.09    0.42
   6   4   2    2.49    0.43
   6   4   2    2.44    0.37
   6  -4  -2    1.68    0.46
   7   4  -2    3.71    0.53
   7  -4   2    4.16    0.56
   7   4  -2    3.84    0.61
  -7   4   2    3.45    0.83
   7  -4   2    4.57    0.74
   7   4   2    5.61    0.66
   7  -4  -2    6.25    0.74
   8  -4   2    1.45    0.58
   8  -4   2    1.05    0.71
   8   4  -2    1.57    0.55
  -8   4   2   -0.16    0.90
   8   4   2    1.76    0.61
   8  -4  -2    1.39    0.62
   9   4  -2    1.19    0.71
   9  -4   2    0.87    0.69
   9   4   2    0.12    0.67
   9  -4  -2    0.31    0.75
   9  -4  -2    0.44    0.67
   0   5  -2    0.35    0.15
   0   5   2    0.24    0.15
   0  -5  -2    0.12    0.16
   0  -5  -2    0.16    0.15
   0   5  -2    0.40    0.23
   0  -5   2    0.23    0.20
   0   5   2    0.30    0.15
   0   5  -2    0.22    0.14
   0   5   2    0.17    0.18
   0   5  -2    0.37    0.09
   1   5  -2   13.16    0.76
  -1   5   2   11.96    0.75
   1  -5   2   13.34    0.80
   1   5  -2   12.52    0.73
   1   5  -2   12.99    0.80
   1   5  -2   12.77    0.71
  -1  -5  -2   13.14    0.75
  -1  -5  -2   12.60    0.70
  -1   5   2   12.91    0.75
  -1   5   2   12.65    0.72
   1  -5  -2   13.56    0.76
   1   5   2   13.79    0.76
   1  -5  -2   11.88    0.74
  -1  -5   2   13.38    0.76
   1   5   2   13.65    0.74
   1   5   2   11.91    0.69
  -1   5  -2   12.09    0.74
  -2  -5  -2   78.87    3.98
  -2   5   2   80.47    4.05
   2   5  -2   80.35    4.03
   2   5  -2   78.43    4.04
   2  -5   2   78.44    4.08
   2   5  -2   77.34    4.11
  -2   5   2   79.48    4.04
   2  -5   2   78.33    3.98
  -2  -5   2   76.68    4.04
   2  -5  -2   79.39    4.06
   2   5   2   76.90    4.04
   2   5   2   77.15    3.98
  -2   5  -2   79.10    4.05
   3  -5   2    2.10    0.28
   3  -5   2    2.49    0.40
   3   5  -2    2.14    0.32
   3   5  -2    2.09    0.29
  -3   5   2    2.71    0.34
  -3  -5   2    2.37    0.31
   3  -5  -2    2.49    0.36
   3  -5  -2    2.08    0.29
  -3   5  -2    2.06    0.33
   3   5   2    2.18    0.20
  -3   5  -2    1.77    0.32
   3   5   2    2.45    0.18
   3   5   2    1.72    0.30
   4  -5   2    5.99    0.60
  -4   5   2    6.43    0.53
   4   5  -2    5.89    0.44
   4  -5   2    6.09    0.63
   4   5  -2    5.12    0.47
  -4   5   2    4.96    0.59
   4  -5   2    5.55    0.44
   4  -5  -2    5.23    0.56
  -4   5  -2    5.34    0.51
   4   5   2    4.36    0.46
   4   5   2    5.35    0.38
   5   5  -2    6.32    0.56
  -5   5   2    6.15    0.74
   5  -5   2    7.23    0.68
   5  -5   2    5.98    0.50
   5   5  -2    6.18    0.48
   5   5   2    5.63    0.44
   5  -5  -2    5.40    0.59
   5   5   2    5.23    0.55
  -6   5   2    2.25    0.66
   6   5  -2    2.44    0.38
   6  -5   2    2.82    0.43
   6   5  -2    2.40    0.45
   6  -5   2    2.91    0.60
   6  -5  -2    1.72    0.52
   6   5   2    2.02    0.44
   7  -5   2    0.53    0.57
   7   5  -2    0.98    0.46
  -7   5   2    1.69    0.87
   7   5   2    1.36    0.52
   7  -5  -2    2.94    0.67
   8  -5   2    3.04    0.63
   8  -5   2    2.15    0.80
  -8   5   2    0.29    0.97
   8   5  -2    2.66    0.63
   8  -5  -2    1.15    0.69
   8   5   2    1.68    0.63
   9  -5   2    2.08    0.96
   9   5  -2    3.22    0.75
   9  -5  -2    3.12    0.79
   9  -5  -2    2.39    0.96
   9   5   2    2.82    0.74
   0   6   2    6.99    0.48
   0  -6  -2    6.81    0.49
   0   6  -2    6.19    0.49
   0   6  -2    6.61    0.40
   0  -6   2    7.38    0.54
   0   6   2    6.81    0.48
   0   6   2    6.57    0.47
   0   6  -2    6.31    0.45
   0  -6  -2    6.30    0.49
   1   6  -2    0.80    0.30
   1   6  -2    0.64    0.21
  -1  -6  -2    0.74    0.17
  -1   6   2    0.44    0.16
   1  -6   2    0.75    0.29
  -1   6   2    0.63    0.20
   1   6  -2    0.76    0.26
   1   6  -2    0.42    0.14
  -1  -6  -2    0.67    0.22
   1  -6  -2    1.04    0.25
   1  -6  -2   -0.26    0.17
   1   6   2    0.61    0.22
   1   6   2    0.73    0.21
  -1   6  -2    0.51    0.22
   1   6   2    0.68    0.17
  -1  -6   2    0.48    0.25
   2  -6   2   25.71    1.49
  -2   6   2   26.78    1.46
   2   6  -2   25.65    1.59
   2  -6   2   25.95    1.35
  -2  -6  -2   26.73    1.37
   2   6  -2   25.58    1.45
   2   6  -2   25.64    1.44
  -2   6   2   25.99    1.43
   2   6   2   25.05    1.37
   2   6   2   26.78    1.45
   2  -6  -2   28.75    1.49
  -2  -6   2   26.95    1.44
  -2   6  -2   26.60    1.45
   3   6  -2    9.61    0.73
  -3   6   2   10.11    0.80
   3  -6   2   11.07    0.62
   3   6  -2   10.15    0.69
  -3   6   2    9.94    0.70
   3  -6   2    9.81    0.78
   3   6   2    9.77    0.59
   3  -6  -2   10.43    0.70
  -3   6  -2    9.91    0.71
  -3  -6   2   11.65    0.71
   3   6   2   10.19    0.56
   3  -6  -2   10.41    0.75
   3   6   2   11.27    0.73
   4  -6   2    5.13    0.62
   4   6  -2    5.04    0.42
   4  -6   2    6.00    0.46
   4   6  -2    4.83    0.48
  -4   6   2    4.92    0.60
  -4   6   2    6.38    0.55
   4   6   2    5.13    0.37
   4  -6  -2    4.79    0.58
  -4   6  -2    6.38    0.58
   4   6   2    5.66    0.53
  -5   6   2    0.24    0.42
   5   6  -2    0.75    0.33
   5   6  -2    0.93    0.28
   5  -6   2    0.14    0.49
  -5   6   2    1.68    0.56
   5  -6   2    1.27    0.30
   5   6   2    0.43    0.37
   5  -6  -2    0.35    0.45
   6   6  -2   12.38    0.97
   6  -6   2   14.00    1.11
  -6   6   2   11.04    1.13
   6  -6   2   14.70    0.94
   6   6   2   13.98    0.99
   6  -6  -2   13.43    1.08
   7  -6   2    1.39    0.70
  -7   6   2    1.62    0.87
   7   6  -2    1.27    0.48
   7   6   2    2.20    0.58
   7  -6  -2    0.85    0.66
  -8   6   2   -0.49    1.01
   8  -6   2   -0.73    0.69
   8   6  -2   -0.01    0.54
   8   6   2   -0.22    0.59
   8  -6  -2   -0.62    0.74
   9  -6   2    5.58    1.15
   9   6  -2    6.22    0.90
   9   6   2    7.13    0.95
   9  -6  -2    5.09    1.02
   0   7  -2    0.17    0.14
   0   7   2   -0.12    0.24
   0  -7  -2    0.19    0.24
   0   7  -2    0.16    0.24
   0   7  -2   -0.12    0.21
   0   7   2    0.24    0.21
   0   7   2   -0.05    0.21
   0  -7   2    0.17    0.27
   0  -7  -2   -0.19    0.21
   1   7  -2   10.75    0.69
  -1   7   2   11.13    0.65
  -1   7   2   10.88    0.73
   1  -7   2   11.47    0.80
   1   7  -2   10.34    0.64
  -1  -7  -2   11.16    0.67
   1   7   2   10.01    0.66
   1  -7  -2   11.87    0.75
   1   7   2   10.76    0.72
  -1  -7   2    9.81    0.73
   1   7   2   11.41    0.70
  -1   7  -2   10.89    0.71
   2   7  -2   12.25    0.74
  -2   7   2   10.31    0.73
   2  -7   2   11.76    0.83
  -2   7   2   12.84    0.80
  -2  -7  -2   12.10    0.67
   2   7  -2   11.56    0.71
   2   7   2   13.23    0.78
   2   7   2   10.86    0.66
  -2  -7   2   11.08    0.76
  -2   7  -2   10.98    0.77
   2   7   2   12.16    0.74
   2  -7  -2    9.06    0.75
   2  -7  -2   12.72    0.83
   3  -7   2    5.48    0.37
   3   7  -2    4.47    0.44
   3  -7   2    5.13    0.59
  -3   7   2    6.78    0.54
  -3   7   2    6.03    0.54
  -3   7  -2    5.36    0.53
   3  -7  -2    4.97    0.57
   3   7   2    4.97    0.34
   3   7   2    5.94    0.50
  -3  -7   2    5.98    0.50
  -4   7   2    0.27    0.44
  -4   7   2    0.38    0.33
   4  -7   2    1.14    0.48
   4   7  -2    0.22    0.23
   4  -7   2    0.26    0.22
   4   7  -2    0.64    0.31
  -4   7  -2    0.65    0.36
   4   7   2    0.38    0.31
   4  -7  -2    0.68    0.40
   5   7  -2    9.05    0.81
   5  -7   2    8.12    0.80
  -5   7   2    7.61    0.72
  -5   7   2    8.53    0.87
   5   7  -2    8.93    0.66
   5   7   2    9.36    0.75
  -5   7  -2    8.17    0.75
   5  -7  -2    8.31    0.79
   6  -7   2    3.42    0.68
   6   7  -2    3.50    0.57
  -6   7   2    4.00    0.82
   6  -7  -2    3.18    0.63
   6   7   2    4.14    0.57
   7  -7   2    9.61    1.06
   7   7  -2    7.95    0.86
   7   7   2    8.38    0.84
   7  -7  -2    7.81    0.99
   8  -7   2   -0.59    0.91
   8  -7  -2   -0.14    0.79
   0   8  -2   12.38    0.71
   0  -8  -2   13.32    0.84
   0   8   2   12.49    0.80
   0   8  -2   12.65    0.85
   0   8   2   12.09    0.81
   0  -8   2   13.59    0.88
  -1   8   2    0.78    0.30
  -1  -8  -2   -0.12    0.23
   1   8  -2    0.75    0.30
   1   8  -2    0.18    0.21
   1  -8   2    0.52    0.38
  -1   8   2    0.38    0.20
   1  -8  -2    0.23    0.33
  -1   8  -2    0.15    0.30
  -1  -8   2    0.07    0.29
   1   8   2    0.57    0.30
   1   8   2    0.65    0.28
  -2   8   2    3.02    0.42
  -2   8   2    3.85    0.38
   2   8  -2    3.09    0.34
  -2  -8  -2    3.45    0.31
   2  -8   2    2.58    0.45
   2   8  -2    3.50    0.40
   2   8   2    3.38    0.39
   2  -8  -2    2.54    0.47
  -2  -8   2    3.22    0.40
   2   8   2    2.49    0.39
  -2   8  -2    3.25    0.42
   3  -8   2   47.97    2.66
   3   8  -2   47.52    2.55
  -3   8   2   45.97    2.56
   3   8  -2   46.57    2.54
  -3   8   2   48.16    2.57
  -3  -8   2   48.40    2.55
   3  -8  -2   47.33    2.63
  -3   8  -2   45.72    2.57
   3   8   2   50.49    2.58
   4   8  -2    0.55    0.34
   4   8  -2    0.76    0.26
   4  -8   2    0.26    0.46
  -4   8   2    0.45    0.36
  -4   8   2    0.64    0.47
  -4   8  -2    0.70    0.39
   4   8   2    0.36    0.37
   4  -8  -2    0.72    0.44
   5   8  -2    1.80    0.42
   5  -8   2    2.06    0.58
  -5   8   2    2.57    0.49
   5   8   2    1.34    0.43
  -5   8  -2    1.70    0.50
   5  -8  -2    2.97    0.63
   6  -8   2   17.43    1.36
   6   8  -2   17.51    1.23
   6  -8  -2   15.88    1.29
   6   8   2   16.07    1.25
   7  -8   2    6.03    0.95
   7   8  -2    3.40    0.70
   7  -8  -2    2.65    0.84
   7   8   2    3.96    0.73
   8   8  -2    0.36    0.63
   8  -8   2   -0.26    0.80
   8  -8  -2   -0.11    0.85
   8   8   2    0.83    0.73
   0  -9  -2    1.45    0.37
   0   9   2    1.02    0.35
   0   9  -2    0.07    0.32
   0   9   2    0.46    0.27
   0  -9   2    0.21    0.35
   1   9  -2   28.91    1.59
  -1   9   2   29.19    1.58
  -1   9   2   27.54    1.65
  -1  -9  -2   28.74    1.61
   1  -9   2   30.62    1.73
   1   9  -2   28.78    1.64
  -1  -9   2   30.25    1.66
   1   9   2   29.35    1.66
   1  -9  -2   29.10    1.69
  -1   9  -2   31.49    1.69
   1   9   2   28.61    1.65
   2   9  -2   19.43    1.18
  -2   9   2   19.34    1.23
  -2   9   2   20.92    1.26
   2   9  -2   21.35    1.24
   2  -9   2   18.51    1.29
   2   9   2   20.88    1.28
  -2  -9   2   20.63    1.23
   2   9   2   21.25    1.26
   2  -9  -2   20.82    1.30
  -2   9  -2   19.22    1.23
   3   9  -2    9.26    0.70
  -3   9   2    7.65    0.70
   3   9  -2    8.47    0.67
   3  -9   2    6.81    0.84
   3   9   2    8.61    0.71
   3  -9  -2    6.35    0.74
  -3   9  -2    7.31    0.67
   3   9   2    7.72    0.65
  -3  -9   2    8.66    0.66
   4   9  -2    2.42    0.44
  -4   9   2    2.68    0.51
   4  -9   2    1.56    0.55
   4  -9  -2    2.12    0.59
   4   9   2    2.67    0.48
  -4   9  -2    2.67    0.53
  -5   9   2    6.26    0.70
   5   9  -2    5.66    0.64
   5  -9   2    5.07    0.80
   5   9   2    7.91    0.76
  -5   9  -2    6.98    0.73
   5  -9  -2    6.78    0.81
   6   9  -2    0.26    0.50
  -6   9   2    0.27    0.51
   6  -9   2    0.00    0.63
   6   9   2    0.22    0.50
   6  -9  -2    0.22    0.71
   7   9  -2    0.86    0.64
   7  -9   2   -1.34    1.19
   7   9   2    0.63    0.65
   8  -9   2    1.62    1.03
   8   9  -2    4.03    0.87
   8  -9  -2    2.76    0.96
   8   9   2    2.00    0.82
   0  10   2   33.96    1.90
   0 -10   2   32.59    1.91
   0  10  -2   33.17    1.90
   0 -10  -2   35.64    1.88
   0  10   2   31.11    1.87
   1 -10   2    1.06    0.46
  -1 -10  -2    0.01    0.31
   1  10  -2    0.39    0.37
  -1  10   2    0.05    0.37
  -1 -10   2    0.35    0.38
   1  10   2    0.04    0.36
  -1  10  -2    0.33    0.37
   1 -10  -2   -0.37    0.41
   1  10   2    0.34    0.34
  -2  10   2    4.08    0.52
   2  10  -2    3.23    0.47
   2 -10   2    3.88    0.58
  -2 -10   2    3.81    0.50
  -2  10  -2    3.26    0.49
   2 -10  -2    4.38    0.60
   2  10   2    3.88    0.53
   2  10   2    4.19    0.53
   3  10  -2    0.93    0.39
   3 -10   2    1.48    0.53
  -3  10   2    1.63    0.47
   3  10  -2    1.15    0.40
   3 -10  -2    0.49    0.55
   3  10   2    1.28    0.45
   3  10   2    0.76    0.40
  -3  10  -2    1.51    0.44
   4  10  -2    0.92    0.41
  -4  10   2    0.20    0.47
   4  10  -2    0.39    0.43
   4 -10   2    0.83    0.57
   4  10   2    0.50    0.47
   4 -10  -2    0.20    0.57
   4  10   2    1.42    0.41
  -4  10  -2    0.32    0.44
  -5  10   2    8.61    0.85
   5 -10   2   10.33    1.05
   5  10  -2   10.11    0.86
   5  10   2    9.19    0.89
   5 -10  -2    7.85    0.99
  -5  10  -2    9.44    0.90
  -6  10   2    4.25    0.71
   6 -10   2    4.27    0.93
   6  10  -2    2.53    0.64
   6  10   2    3.07    0.72
   6 -10  -2    3.17    0.87
  -6  10  -2    2.32    0.73
   7  10  -2    1.24    0.72
   7 -10   2    0.92    0.92
   7 -10  -2    1.04    0.91
   0  11  -2    0.43    0.39
   0 -11   2    1.52    0.50
   0  11   2    1.08    0.44
   0 -11  -2    0.94    0.45
   1  11  -2   11.15    0.83
   1 -11   2   10.17    0.88
  -1  11   2    8.77    0.80
  -1 -11   2    9.99    0.80
   1  11   2    9.45    0.80
  -1  11  -2    9.75    0.81
   1 -11  -2   10.86    0.86
   2 -11   2    1.62    0.59
   2  11  -2    2.33    0.46
  -2  11   2    3.38    0.52
   2  11   2    2.59    0.50
  -2  11  -2    1.85    0.53
   3  11  -2    8.99    0.77
   3 -11   2    6.34    0.79
  -3  11   2    7.19    0.72
   3  11   2    7.14    0.75
  -3  11  -2    7.31    0.75
   3 -11  -2    6.54    0.82
   3  11   2    6.03    0.70
   4  11  -2    5.51    0.68
  -4  11   2    4.40    0.64
  -4  11  -2    5.58    0.68
   4  11   2    4.17    0.70
   4 -11  -2    3.74    0.74
   4  11   2    5.86    0.67
  -5  11   2    2.89    0.68
   5  11  -2    3.02    0.60
   5 -11   2    2.84    0.82
   5  11  -2    2.06    0.68
  -5  11  -2    3.50    0.67
   5  11   2    3.30    0.62
   5  11   2    1.79    0.68
   5 -11  -2    4.31    0.89
   6  11  -2    1.59    0.64
  -6  11   2    0.44    0.68
   6  11  -2   -0.61    0.64
   6 -11   2    0.27    0.78
   6  11   2    0.18    0.70
   6 -11  -2   -0.19    0.84
  -6  11  -2    0.35    0.65
   7  11  -2    0.90    0.82
   7  11   2   -0.39    0.79
   0 -12   2   -0.25    0.51
   0  12   2   -0.35    0.41
   0  12  -2   -0.08    0.43
  -1  12   2    3.32    0.57
   1 -12   2    4.38    0.69
   1  12  -2    3.62    0.59
   1  12   2    5.23    0.66
  -1  12  -2    5.03    0.66
   1 -12  -2    3.75    0.67
   2  12  -2    0.83    0.45
   2 -12   2   -0.41    0.60
  -2  12   2    0.69    0.47
   2  12   2    0.99    0.45
   2 -12  -2    0.93    0.62
  -2  12  -2   -0.05    0.50
  -3  12   2   14.03    1.05
   3  12  -2   11.79    1.01
   3 -12   2   11.80    1.14
   3 -12  -2    9.79    1.07
   3  12   2   12.06    1.01
  -3  12  -2   15.17    1.10
   4  12  -2    3.01    0.62
  -4  12   2    2.93    0.66
   4 -12   2    1.26    0.81
   4 -12  -2    3.24    0.87
  -4  12  -2    2.38    0.61
   4  12   2    3.73    0.62
  -5  12   2    0.62    0.68
   5  12   2    0.10    0.60
  -5  12  -2    1.04    0.64
   5 -12  -2   -0.15    0.82
   6  12  -2    1.53    0.65
   6 -12   2    2.22    0.97
  -6  12   2    0.07    0.67
   6 -12  -2    0.47    0.94
   6  12   2    1.04    0.64
   6  12   2   -0.15    0.81
  -6  12  -2    0.62    0.78
   0  13  -2   -0.44    0.52
   0  13   2   -0.19    0.47
   1 -13   2    1.30    0.66
  -1  13   2    1.14    0.54
   1  13  -2    0.19    0.53
  -1  13  -2    0.23    0.49
   1  13   2    0.75    0.50
   2  13  -2    1.24    0.55
  -2  13   2    1.42    0.56
   2 -13   2    2.14    0.75
   2  13   2    1.79    0.55
  -2  13  -2    1.77    0.58
   2 -13  -2    2.07    0.76
   3 -13   2    1.54    0.80
   3  13  -2    1.06    0.55
  -3  13   2    1.32    0.65
   3  13   2    0.39    0.58
  -3  13  -2    1.60    0.59
   3 -13  -2    1.24    0.81
  -4  13   2    3.90    0.73
   4  13  -2    3.97    0.70
   4 -13   2    2.47    0.95
   4 -13  -2    2.78    0.92
   4  13   2    3.12    0.73
  -4  13  -2    3.13    0.72
   5  13  -2    2.20    0.77
   5 -13   2    2.36    1.03
  -5  13   2    2.80    0.79
  -5  13  -2    1.05    0.78
   5 -13  -2    2.45    0.96
   5  13   2    2.85    0.79
   0  14  -2    0.15    0.64
   0  14   2    0.27    0.61
   1  14  -2    0.29    0.72
   2  14  -2    0.91    0.69
   2 -14   2    1.09    0.82
  -2  14   2    1.42    0.69
  -2  14  -2    1.48    0.68
   2  14   2    0.97    0.60
   3 -14   2    0.75    0.83
  -3  14   2    0.38    0.63
   3  14  -2    0.29    0.68
   3  14   2   -0.21    0.57
   3 -14  -2   -0.85    0.89
  -3  14  -2    0.22    0.69
   4  14  -2    0.72    0.67
  -4  14   2    0.58    0.75
   4 -14   2    0.44    0.92
   4  14   2    0.37    0.70
  -4  14  -2    0.75    0.76
   4 -14  -2    1.13    1.00
   0  15   2   -1.25    0.69
   0  15  -2   -0.30    0.70
   1  15  -2    0.53    0.74
  -1  15   2    2.37    0.80
   1  15   2    1.22    0.69
  -1  15  -2    2.61    0.80
   2  15  -2    0.04    0.67
  -2  15   2   -0.78    0.66
  -2  15  -2   -0.53    0.72
   2  15   2    0.46    0.69
   0   0  -3    0.28    0.08
   0   0   3    0.39    0.09
   0   0  -3    0.38    0.09
   0   0   3    0.30    0.08
  -1   0   3   35.79    1.88
   1   0   3   36.81    1.86
  -1   0   3   37.82    1.88
   1   0   3   35.61    1.86
  -1   0  -3   36.25    1.85
   1   0  -3   36.14    1.88
  -1   0  -3   33.92    1.85
   1   0  -3   36.68    1.87
   2   0   3  181.27    8.99
  -2   0  -3  175.27    8.98
  -2   0  -3  173.44    8.98
   2   0  -3  176.06    8.99
   2   0   3  176.02    8.98
  -2   0   3  181.99    9.03
  -3   0   3   16.63    1.05
   3   0  -3   17.07    0.94
   3   0   3   16.75    0.98
   3   0   3   17.56    0.96
  -3   0  -3   16.69    0.94
   3   0   3   17.13    1.06
   4   0   3   -0.18    0.20
  -4   0   3   -0.16    0.34
   4   0  -3   -0.06    0.18
   4   0   3    0.37    0.22
  -5   0   3    4.15    0.69
   5   0  -3    5.21    0.45
   5   0   3    4.50    0.46
   5   0   3    4.41    0.45
   6   0   3   16.96    1.09
  -6   0   3   16.48    1.34
   6   0  -3   16.22    1.07
   6   0   3   16.49    1.11
   7   0  -3   -0.62    0.39
  -7   0   3   -0.36    0.68
   7   0   3    0.08    0.44
   7   0   3   -0.32    0.40
   8   0   3   -0.01    0.51
   8   0   3   -0.77    0.55
  -8   0   3    0.89    0.95
   8   0  -3   -0.02    0.49
   9   0   3   -0.31    0.56
   9   0  -3    0.46    0.70
   9   0  -3    0.57    0.58
   0   1  -3   13.36    0.67
   0   1   3   13.03    0.71
   0  -1  -3   13.06    0.71
   0   1  -3   12.58    0.70
   0  -1   3   13.11    0.71
   0  -1  -3   13.13    0.69
   0  -1   3   11.37    0.67
   0   1  -3   13.52    0.69
   0   1   3   13.44    0.70
   0  -1   3   13.78    0.69
   1   1  -3   41.80    2.17
  -1  -1  -3   43.13    2.14
   1  -1   3   42.85    2.15
  -1  -1  -3   43.52    2.16
   1   1  -3   41.96    2.17
  -1   1   3   41.56    2.16
   1  -1   3   43.45    2.17
  -1   1   3   43.35    2.14
  -1   1   3   42.42    2.17
   1  -1   3   43.49    2.15
  -1   1  -3   39.93    2.14
  -1  -1   3   39.14    2.17
   1  -1  -3   41.06    2.16
  -1  -1   3   43.37    2.18
   1   1   3   41.98    2.17
   1   1   3   40.85    2.14
   1  -1  -3   41.73    2.14
   1  -1  -3   40.20    2.15
  -1   1  -3   43.00    2.15
  -1   1  -3   40.98    2.17
   2   1  -3   58.21    3.21
  -2   1   3   60.61    3.17
   2   1  -3   61.59    3.17
   2   1  -3   60.30    3.21
  -2  -1  -3   62.10    3.18
   2  -1   3   62.30    3.16
  -2   1   3   62.23    3.21
   2  -1   3   61.58    3.18
   2  -1  -3   65.34    3.16
  -2   1  -3   60.73    3.16
   2  -1  -3   62.48    3.17
   2   1   3   61.74    3.18
  -2   1  -3   61.41    3.18
   2   1   3   62.92    3.15
  -2  -1   3   62.68    3.22
  -3   1   3    5.75    0.52
   3  -1   3    4.95    0.36
   3  -1   3    5.04    0.53
   3  -1   3    5.50    0.42
  -3  -1  -3    5.38    0.36
   3   1   3    5.67    0.41
  -3  -1   3    5.08    0.51
   3  -1  -3    4.91    0.39
   3   1   3    5.42    0.38
   3  -1  -3    5.06    0.38
  -3   1  -3    4.85    0.39
  -4  -1  -3   89.34    4.77
   4   1  -3   93.07    4.80
  -4   1   3   94.02    4.91
   4  -1   3   90.53    4.81
   4  -1   3   97.42    4.81
   4   1   3   94.35    4.82
  -4  -1   3   92.51    4.91
   4  -1  -3   93.08    4.81
   4   1   3   95.90    4.79
   5   1  -3    4.29    0.42
  -5   1   3    4.20    0.69
   5  -1   3    5.22    0.49
   5  -1   3    4.45    0.44
  -5  -1   3    4.44    0.72
   5   1   3    4.01    0.45
   5   1   3    4.38    0.44
   5  -1  -3    4.13    0.45
   6  -1   3    5.78    0.60
   6  -1   3    4.72    0.50
   6   1  -3    5.29    0.51
  -6   1   3    5.03    0.82
  -6  -1   3    4.60    0.91
   6   1   3    4.17    0.53
   6   1   3    4.35    0.52
   6  -1  -3    5.69    0.57
   7  -1   3    2.79    0.52
   7   1  -3    2.64    0.50
  -7   1   3    4.37    0.92
   7   1   3    2.56    0.49
   7  -1  -3    3.30    0.52
   7   1   3    3.69    0.56
  -7  -1   3    1.90    0.77
   8  -1   3    1.80    0.57
   8   1  -3    0.80    0.55
   8  -1   3    0.94    0.63
  -8   1   3    2.09    0.92
   8   1  -3    2.15    0.53
   8  -1  -3    1.48    0.60
   8   1   3    1.56    0.61
   8   1   3    2.08    0.59
   9  -1   3    1.07    0.80
   9   1  -3    1.54    0.70
   9  -1   3    3.27    0.73
   9   1   3    1.94    0.65
   9  -1  -3    2.56    0.72
   9  -1  -3    2.12    0.71
   0   2   3   10.10    0.53
   0   2   3    9.08    0.47
   0   2  -3    8.45    0.48
   0   2   3    8.71    0.46
   0  -2   3    7.94    0.53
   0  -2  -3    8.50    0.52
   0  -2   3    8.34    0.47
   0   2  -3    8.40    0.46
   0   2  -3    7.69    0.51
   0  -2  -3    8.79    0.46
  -1  -2  -3   11.39    0.55
   1  -2   3   11.40    0.65
   1   2  -3    9.54    0.62
  -1   2   3   10.75    0.62
   1  -2   3   10.74    0.59
   1   2  -3   10.52    0.63
  -1  -2  -3   10.38    0.61
  -1   2   3   11.21    0.60
  -1   2   3   11.03    0.59
   1  -2   3   11.41    0.58
   1  -2  -3   11.33    0.59
  -1  -2   3   10.08    0.62
   1   2   3   11.58    0.62
   1   2   3   10.19    0.55
  -1  -2   3   10.52    0.64
  -1   2  -3    9.87    0.56
   1  -2  -3   10.95    0.61
  -1   2  -3   10.55    0.63
  -1   2  -3   10.56    0.60
   1  -2  -3   10.38    0.59
   2  -2   3   38.62    1.97
   2   2  -3   38.59    2.01
   2  -2   3   35.86    1.95
  -2   2   3   37.27    1.98
  -2   2   3   36.73    1.94
  -2   2   3   36.14    1.95
  -2  -2  -3   36.49    1.96
  -2  -2  -3   36.90    1.90
   2  -2   3   36.93    1.93
   2  -2   3   38.81    1.97
  -2   2  -3   38.03    1.95
  -2  -2   3   36.23    1.97
   2   2   3   38.26    1.91
  -2  -2   3   37.21    2.01
   2  -2  -3   37.20    1.95
   2  -2  -3   36.73    1.93
  -2   2  -3   37.27    1.97
   2   2   3   37.10    1.96
   2  -2  -3   40.33    1.99
   3  -2   3   10.17    0.67
   3  -2   3   10.25    0.73
  -3   2   3   10.43    0.74
   3   2  -3   10.56    0.70
   3  -2   3   10.07    0.60
   3   2  -3    9.67    0.62
  -3  -2  -3    9.64    0.56
  -3  -2   3    9.62    0.77
   3  -2  -3    9.81    0.62
   3   2   3   10.66    0.58
   3  -2  -3    9.53    0.65
   4  -2   3   22.49    1.24
   4   2  -3   22.85    1.24
  -4   2   3   23.34    1.41
  -4  -2  -3   23.00    1.21
   4  -2   3   20.91    1.28
   4   2   3   21.96    1.26
   4  -2  -3   22.38    1.27
   4   2   3   23.15    1.22
  -4  -2   3   20.66    1.44
   5  -2   3    0.27    0.25
   5  -2   3    0.11    0.36
   5   2  -3    0.24    0.24
  -5   2   3   -0.84    0.44
   5   2   3    0.17    0.25
   5  -2  -3    0.39    0.28
   5   2   3    0.29    0.29
  -5  -2   3    0.70    0.53
   6  -2   3   46.10    2.55
  -6   2   3   48.06    2.78
   6   2  -3   45.95    2.53
   6  -2   3   50.18    2.61
   6  -2  -3   46.24    2.56
   6   2   3   45.97    2.52
  -7   2   3    4.72    0.90
   7  -2   3    7.29    0.65
   7  -2   3    6.91    0.77
   7   2  -3    7.25    0.73
  -7  -2   3    4.69    0.91
   7   2   3    5.96    0.66
   7   2   3    7.02    0.66
   7  -2  -3    5.86    0.70
  -8   2   3    4.37    1.10
   8  -2   3    4.06    0.77
   8  -2   3    4.40    0.67
   8   2  -3    4.11    0.63
   8   2  -3    5.21    0.72
   8  -2  -3    4.06    0.71
   8   2   3    4.54    0.65
   9   2  -3    1.16    0.62
   9  -2   3   -0.35    0.76
   9  -2   3    0.40    0.58
   9   2  -3   -0.06    0.66
   9  -2  -3    0.06    0.64
   9  -2  -3    1.21    0.63
   0  -3   3   36.06    1.86
   0  -3  -3   34.25    1.85
   0   3  -3   35.49    1.83
   0   3  -3   35.45    1.80
   0   3  -3   34.49    1.86
   0  -3  -3   36.31    1.82
   0  -3   3   34.50    1.83
   0   3   3   35.96    1.81
   0   3   3   35.91    1.85
   0   3   3   35.61    1.83
   1   3  -3  101.60    5.23
  -1   3   3  103.22    5.22
   1  -3   3  100.90    5.18
   1   3  -3   97.89    5.22
   1  -3   3  104.53    5.24
   1  -3   3  101.40    5.18
   1  -3   3   97.57    5.22
  -1   3   3  102.41    5.21
  -1   3   3  100.39    5.21
   1  -3  -3  103.26    5.21
   1  -3  -3  103.07    5.22
   1  -3  -3  106.04    5.22
  -1   3  -3  103.91    5.21
  -1  -3   3  102.64    5.24
  -1   3  -3  102.81    5.24
  -1  -3   3  103.86    5.23
   1   3   3  106.81    5.23
  -2   3   3   50.44    2.57
   2  -3   3   50.42    2.58
   2  -3   3   49.26    2.61
   2  -3   3   51.57    2.58
   2   3  -3   50.35    2.59
   2   3  -3   48.27    2.63
  -2   3   3   48.83    2.58
   2  -3   3   52.22    2.54
  -2  -3  -3   49.21    2.59
  -2   3   3   51.52    2.60
   2  -3  -3   48.30    2.61
  -2   3  -3   48.52    2.61
   2  -3  -3   49.73    2.58
  -2  -3   3   48.55    2.59
  -2   3  -3   49.33    2.61
  -2  -3   3   50.04    2.64
   2  -3  -3   47.71    2.57
  -3   3   3    1.72    0.25
   3  -3   3    1.29    0.18
   3   3  -3    1.38    0.29
  -3   3   3    1.03    0.29
   3  -3   3    1.38    0.28
   3  -3  -3    1.40    0.23
  -3   3  -3    1.13    0.25
   3   3   3    1.47    0.15
  -3  -3   3    0.92    0.35
   3   3   3    1.50    0.24
  -4  -3  -3   14.28    0.80
   4  -3   3   15.10    0.92
  -4   3   3   15.23    1.04
   4  -3   3   13.49    0.83
   4   3  -3   13.68    0.84
   4  -3  -3   13.78    0.88
  -4  -3   3   14.39    1.06
   4   3   3   14.12    0.80
   4   3   3   14.56    0.88
   5  -3   3   12.08    0.77
   5  -3   3   11.17    0.90
   5   3  -3   11.77    0.76
  -5   3   3   11.24    1.00
   5   3   3   11.43    0.92
   5   3   3   11.73    0.83
   5  -3  -3   10.36    0.80
  -5  -3   3   11.91    1.03
   6  -3   3    5.17    0.62
   6  -3   3    3.74    0.47
  -6   3   3    3.57    0.76
   6   3  -3    3.59    0.43
   6   3   3    4.53    0.45
   6   3   3    3.24    0.47
   6  -3  -3    3.54    0.51
  -6  -3   3    3.96    0.80
   7  -3   3    5.46    0.72
  -7   3   3    5.67    0.95
   7   3  -3    5.25    0.59
   7   3  -3    5.37    0.64
   7  -3   3    5.84    0.65
   7  -3  -3    6.62    0.73
   7   3   3    7.04    0.71
   8  -3   3    3.37    0.63
  -8   3   3    2.79    0.93
   8  -3   3    3.15    0.77
   8   3  -3    3.78    0.66
   8   3  -3    3.08    0.62
   8   3   3    3.35    0.66
   8  -3  -3    2.08    0.63
   9  -3   3    0.36    0.85
   9   3  -3    0.72    0.68
   9  -3   3    0.43    0.64
   9  -3  -3   -0.79    0.86
   9  -3  -3    1.05    0.69
   9   3   3    0.16    0.60
   0   4   3   10.22    0.59
   0  -4  -3   10.46    0.61
   0  -4   3   10.20    0.59
   0  -4  -3   10.37    0.57
   0   4  -3   10.57    0.60
   0   4   3   10.29    0.62
   0   4   3   10.12    0.56
   0   4  -3    9.99    0.53
   0  -4   3    9.94    0.62
   0   4  -3   10.30    0.54
   0   4  -3    9.40    0.65
   1  -4   3   66.12    3.51
   1   4  -3   71.92    3.51
  -1  -4  -3   66.80    3.51
  -1   4   3   71.51    3.51
  -1   4   3   68.85    3.51
  -1   4   3   71.11    3.51
   1   4  -3   67.70    3.52
   1   4  -3   66.42    3.52
   1   4   3   71.13    3.53
   1  -4  -3   67.79    3.51
  -1   4  -3   65.81    3.51
   1   4   3   68.29    3.46
  -1   4  -3   66.48    3.54
   1  -4  -3   66.07    3.50
   1  -4  -3   68.57    3.52
  -1  -4   3   67.67    3.53
  -1  -4   3   69.87    3.52
  -2   4   3   13.98    0.77
   2  -4   3   14.22    0.83
  -2   4   3   13.47    0.79
   2   4  -3   12.27    0.87
   2  -4   3   13.17    0.74
   2   4  -3   12.76    0.80
   2  -4   3   12.55    0.70
   2  -4  -3   13.01    0.79
  -2   4  -3   13.65    0.77
   2  -4  -3   12.75    0.77
   2   4   3   13.42    0.79
  -2  -4   3   13.33    0.86
  -2  -4   3   14.18    0.80
   3  -4   3   81.40    4.08
   3  -4   3   81.68    4.16
  -3   4   3   79.01    4.12
  -3   4   3   76.53    4.16
   3   4  -3   76.64    4.12
   3   4   3   79.82    4.04
   3  -4  -3   80.09    4.14
   3   4   3   80.42    4.13
   3   4   3   78.47    4.05
  -3  -4   3   84.51    4.22
  -3   4  -3   82.10    4.13
  -3  -4   3   78.23    4.13
   4  -4   3    0.62    0.21
  -4   4   3    0.12    0.39
   4   4  -3    0.38    0.20
   4  -4   3    0.45    0.37
  -4   4   3    0.78    0.32
   4   4   3    0.32    0.17
   4  -4  -3    0.28    0.26
   4   4   3    0.34    0.21
   4   4   3    0.42    0.24
  -4  -4   3    0.66    0.46
   5  -4   3   21.23    1.31
   5   4  -3   20.19    1.14
  -5   4   3   18.05    1.39
   5  -4   3   19.35    1.14
   5  -4  -3   19.57    1.24
   5   4   3   19.95    1.11
  -5  -4   3   18.86    1.42
   5   4   3   19.09    1.21
   6  -4   3    5.66    0.54
   6  -4   3    6.20    0.70
  -6   4   3    5.96    0.86
   6   4  -3    5.14    0.52
   6   4  -3    6.37    0.61
   6   4   3    5.13    0.57
   6  -4  -3    4.54    0.59
   7  -4   3    1.86    0.55
  -7   4   3    2.38    0.86
   7   4  -3    1.33    0.43
   7  -4   3    2.78    0.62
   7   4  -3    2.38    0.53
   7   4   3    1.69    0.52
   7  -4  -3    1.70    0.57
   8  -4   3    3.28    0.80
  -8   4   3    3.01    0.99
   8  -4   3    3.45    0.63
   8   4  -3    3.56    0.67
   8  -4  -3    1.82    0.71
   8   4   3    2.09    0.59
   9  -4   3    2.40    0.75
   9   4  -3    1.54    0.75
   9   4   3    1.85    0.69
   9  -4  -3    2.12    0.64
   9  -4  -3    2.61    0.88
   0   5  -3    8.67    0.47
   0   5  -3    8.78    0.49
   0  -5  -3    9.34    0.57
   0   5  -3    8.48    0.63
   0   5  -3    9.54    0.55
   0   5   3    8.59    0.52
   0   5   3    9.27    0.55
   0  -5  -3    8.47    0.54
   0  -5   3    9.33    0.63
   0   5   3    7.57    0.57
  -1  -5  -3   44.36    2.31
  -1   5   3   41.76    2.35
  -1  -5  -3   41.80    2.35
   1   5  -3   44.96    2.37
   1   5  -3   43.57    2.38
   1   5  -3   46.27    2.36
  -1   5   3   46.01    2.34
   1  -5   3   44.17    2.39
  -1   5   3   45.29    2.36
   1   5  -3   43.79    2.32
   1   5   3   44.58    2.30
   1  -5  -3   46.14    2.39
   1   5   3   47.93    2.36
   1  -5  -3   46.31    2.36
  -1   5  -3   48.22    2.36
   1   5   3   48.43    2.38
  -1  -5   3   44.73    2.37
  -2   5   3    8.33    0.57
  -2   5   3    8.75    0.60
   2  -5   3    8.77    0.65
   2  -5   3    9.43    0.48
   2   5  -3    9.95    0.74
   2   5  -3    8.81    0.55
   2   5  -3    8.14    0.63
  -2   5  -3    9.92    0.60
   2   5   3    8.18    0.61
  -2  -5   3    8.02    0.64
   2  -5  -3    8.87    0.59
   2  -5  -3    8.79    0.59
   3  -5   3    9.13    0.72
   3  -5   3    9.57    0.63
  -3   5   3    8.77    0.63
  -3   5   3    9.83    0.71
   3  -5   3    8.91    0.55
   3   5  -3    8.91    0.62
  -3   5  -3    9.72    0.65
   3   5   3    9.65    0.65
  -3  -5   3   10.22    0.67
   3  -5  -3   10.10    0.67
   4   5  -3    3.31    0.40
   4   5  -3    4.67    0.39
  -4   5   3    4.12    0.56
  -4   5   3    3.88    0.44
   4  -5   3    4.66    0.54
   4   5   3    4.47    0.30
  -4   5  -3    3.62    0.46
   4  -5  -3    4.42    0.50
   4   5   3    4.71    0.47
  -5   5   3   29.58    1.79
   5  -5   3   27.69    1.55
   5  -5   3   28.51    1.69
   5   5  -3   28.05    1.56
   5   5  -3   28.31    1.62
   5  -5  -3   26.78    1.67
   5   5   3   28.46    1.63
   6  -5   3    3.78    0.45
   6   5  -3    3.03    0.43
   6  -5   3    3.03    0.61
  -6   5   3    3.59    0.76
   6   5  -3    2.76    0.49
   6  -5  -3    2.78    0.53
   6   5   3    3.35    0.50
   7   5  -3    3.14    0.56
   7   5  -3    2.90    0.50
   7  -5   3    4.04    0.64
  -7   5   3    2.34    0.88
   7  -5   3    2.90    0.66
   7  -5  -3    3.76    0.70
   7   5   3    3.90    0.59
   8  -5   3    3.12    0.85
   8   5  -3    2.89    0.67
  -8   5   3    2.33    1.03
   8  -5   3    2.66    0.64
   8   5   3    2.09    0.61
   8  -5  -3    2.95    0.81
   9  -5   3    2.45    0.97
   9   5  -3    2.12    0.73
   9   5   3    1.50    0.71
   9  -5  -3    3.00    0.75
   9  -5  -3    2.51    0.93
   0   6  -3   23.90    1.22
   0  -6   3   23.03    1.33
   0  -6  -3   24.25    1.28
   0   6   3   23.12    1.30
   0  -6  -3   22.35    1.29
   0   6  -3   24.43    1.30
   0   6   3   24.84    1.30
   0   6  -3   23.04    1.23
  -1  -6  -3   15.26    0.82
  -1   6   3   15.24    0.88
  -1   6   3   15.04    0.85
   1   6  -3   15.44    0.92
   1   6  -3   15.49    0.82
   1  -6   3   14.71    0.95
   1   6  -3   14.24    0.86
   1  -6  -3   13.73    0.89
   1   6   3   14.20    0.81
  -1   6  -3   15.27    0.88
   1   6   3   15.41    0.87
   1   6   3   14.26    0.90
  -1  -6   3   16.56    0.91
   1  -6  -3   15.61    0.90
  -2   6   3   37.56    2.02
  -2   6   3   38.38    2.03
   2   6  -3   39.07    2.01
   2   6  -3   35.55    2.13
   2  -6   3   39.50    2.08
  -2  -6   3   39.81    2.03
  -2   6  -3   37.70    2.03
   2   6   3   37.74    1.92
   2   6   3   39.34    2.04
   2  -6  -3   35.59    2.02
   2  -6  -3   36.32    2.04
  -3   6   3    3.43    0.45
   3  -6   3    4.23    0.32
   3   6  -3    5.17    0.42
   3  -6   3    4.06    0.31
  -3   6   3    4.24    0.43
   3  -6   3    3.06    0.48
   3   6   3    4.12    0.44
  -3  -6   3    4.40    0.44
  -3   6  -3    4.68    0.44
   3  -6  -3    3.85    0.44
  -4   6   3    2.63    0.43
   4  -6   3    2.74    0.50
   4   6  -3    3.28    0.36
  -4   6   3    4.18    0.57
   4   6  -3    4.24    0.42
   4  -6   3    3.50    0.32
   4  -6  -3    4.13    0.52
   4   6   3    3.26    0.42
  -4   6  -3    3.69    0.46
   5   6  -3    0.92    0.28
   5   6  -3    1.30    0.38
   5  -6   3    1.04    0.30
   5  -6   3    0.78    0.52
  -5   6   3    0.99    0.44
  -5   6   3    1.04    0.57
   5  -6  -3    0.53    0.45
  -6   6   3    7.28    0.96
   6   6  -3    8.47    0.77
   6  -6   3    9.43    0.75
   6  -6   3    9.41    0.88
   6   6  -3   10.03    0.73
   6   6   3    7.66    0.75
   6  -6  -3    7.40    0.79
   7   6  -3    0.29    0.45
  -7   6   3   -0.28    0.83
   7  -6   3   -1.12    0.64
   7   6   3    0.09    0.47
   7  -6  -3   -0.04    0.60
  -8   6   3    5.25    1.18
   8   6  -3    4.54    0.77
   8  -6   3    4.48    0.92
   8  -6  -3    4.10    0.84
   8   6   3    4.04    0.77
   9  -6   3    0.96    0.97
   9   6  -3    0.64    0.71
   9   6   3    0.52    0.75
   9  -6  -3   -0.93    0.81
   0  -7  -3    1.35    0.28
   0   7   3    1.35    0.26
   0  -7  -3    1.67    0.28
   0   7  -3    1.80    0.30
   0  -7   3    1.11    0.32
   0   7  -3    1.13    0.15
   0   7   3    1.13    0.26
   1   7  -3    1.39    0.29
   1  -7   3    1.20    0.37
  -1  -7  -3    1.58    0.23
  -1   7   3    1.76    0.31
  -1   7   3    1.52    0.24
   1   7  -3    2.21    0.36
   1   7  -3    1.97    0.21
   1  -7  -3    1.61    0.32
  -1   7  -3    1.75    0.31
  -1  -7   3    1.98    0.33
   1  -7  -3    1.49    0.32
   1   7   3    1.64    0.29
   1   7   3    1.95    0.22
   1   7   3    2.04    0.33
   2   7  -3   10.55    0.67
  -2  -7  -3   11.91    0.59
   2   7  -3    9.88    0.69
   2  -7   3    8.31    0.75
  -2   7   3   12.79    0.74
   2   7   3   10.49    0.74
  -2   7  -3    9.89    0.72
  -2  -7   3    9.56    0.72
   2  -7  -3   10.76    0.78
   2  -7  -3    9.00    0.76
   3  -7   3    7.79    0.73
  -3   7   3    8.07    0.62
  -3   7   3    6.90    0.63
   3   7  -3    7.99    0.60
   3  -7   3    8.09    0.47
  -3   7  -3    6.70    0.61
   3   7   3    8.96    0.67
  -3  -7   3    8.13    0.63
   3  -7  -3    7.29    0.67
  -4   7   3   26.99    1.60
   4  -7   3   27.22    1.73
  -4   7   3   26.84    1.70
   4   7  -3   28.42    1.60
   4   7   3   27.46    1.61
  -4   7  -3   29.38    1.62
   4  -7  -3   29.34    1.69
  -5   7   3    1.40    0.41
  -5   7   3    1.68    0.60
   5   7  -3    1.72    0.34
   5   7  -3    1.25    0.41
   5  -7   3    1.62    0.58
   5  -7  -3    1.20    0.52
   5   7   3    1.23    0.44
  -5   7  -3    1.98    0.44
   6  -7   3    1.38    0.59
   6   7  -3    1.13    0.46
  -6   7   3    0.83    0.73
   6  -7  -3   -0.53    0.49
   6   7   3    0.50    0.43
   7  -7   3    3.03    0.76
   7   7  -3    3.58    0.66
   7   7   3    4.41    0.66
   7  -7  -3    5.15    0.78
   8  -7   3    3.74    0.99
   8   7   3    4.88    0.79
   8  -7  -3    3.32    0.93
   0   8   3    3.04    0.36
   0   8  -3    3.17    0.40
   0  -8   3    2.71    0.44
   0   8  -3    2.72    0.22
   0  -8  -3    3.64    0.39
   0   8   3    3.28    0.39
   1  -8   3    7.27    0.64
  -1   8   3    6.60    0.55
   1   8  -3    5.13    0.44
  -1  -8  -3    5.23    0.45
  -1   8   3    6.33    0.50
   1   8  -3    6.25    0.51
  -1  -8   3    6.73    0.55
  -1   8  -3    6.94    0.56
   1   8   3    5.95    0.54
   1   8   3    6.42    0.54
   1  -8  -3    6.36    0.56
  -2  -8  -3    6.53    0.44
   2   8  -3    7.03    0.57
  -2   8   3    6.60    0.53
   2  -8   3    5.94    0.62
  -2   8   3    6.08    0.55
   2   8  -3    6.73    0.51
  -2  -8   3    6.02    0.56
  -2   8  -3    4.49    0.53
   2   8   3    6.55    0.59
   2   8   3    6.56    0.54
   2  -8  -3    7.21    0.62
   3   8  -3    2.60    0.37
   3  -8   3    1.91    0.49
  -3   8   3    3.72    0.45
   3   8  -3    3.19    0.42
  -3   8   3    3.17    0.47
  -3  -8   3    3.20    0.43
   3  -8  -3    2.65    0.47
  -3   8  -3    2.94    0.44
   3   8   3    3.46    0.47
  -4   8   3    9.25    0.77
   4   8  -3    9.15    0.74
   4  -8   3    8.36    0.83
  -4   8   3    8.84    0.82
  -4   8  -3    8.95    0.77
   4   8   3   10.24    0.79
  -4  -8   3    8.62    0.72
   4  -8  -3    9.00    0.83
   5  -8   3    2.07    0.60
   5   8  -3    2.77    0.47
  -5   8   3    3.68    0.71
  -5   8   3    2.64    0.51
  -5   8  -3    2.33    0.53
   5   8   3    2.11    0.48
   5  -8  -3    3.65    0.66
   6   8  -3    5.80    0.69
   6  -8   3    4.08    0.77
   6   8   3    5.50    0.68
   6  -8  -3    5.29    0.77
   7  -8   3    1.92    0.84
   7   8  -3    3.36    0.68
   7  -8  -3    2.78    0.76
   7   8   3    1.95    0.68
   8   8  -3    0.92    0.72
   8  -8   3    1.81    0.97
   8   8   3    0.02    0.65
   8  -8  -3    0.43    0.86
   0  -9   3   12.73    0.93
   0   9  -3   13.10    0.89
   0   9   3   11.57    0.81
   0  -9  -3   11.80    0.87
   0   9   3   13.01    0.87
   1   9  -3   28.67    1.61
   1  -9   3   30.21    1.72
  -1   9   3   31.15    1.70
  -1  -9  -3   31.11    1.62
   1   9  -3   29.77    1.67
  -1   9   3   29.49    1.61
   1  -9  -3   28.30    1.71
   1   9   3   27.90    1.66
  -1  -9   3   29.93    1.70
  -1   9  -3   30.87    1.69
   1   9   3   29.25    1.68
   2   9  -3    3.34    0.42
  -2   9   3    2.19    0.42
   2  -9   3    2.04    0.54
  -2   9   3    3.53    0.40
   2   9  -3    3.27    0.37
   2   9   3    3.32    0.48
  -2  -9   3    2.29    0.43
   2  -9  -3    3.30    0.53
  -2   9  -3    3.45    0.47
   3   9  -3    8.18    0.68
   3   9  -3    7.81    0.62
  -3   9   3    6.58    0.65
   3  -9   3    6.52    0.76
  -3  -9   3    9.01    0.71
   3   9   3    8.78    0.73
  -3   9  -3    7.73    0.69
   3   9   3    9.53    0.68
   3  -9  -3    7.08    0.76
  -4   9   3    2.59    0.50
   4   9  -3    1.81    0.42
   4  -9   3    2.56    0.63
   4  -9  -3    2.46    0.55
  -4   9  -3    2.10    0.47
   5  -9   3   12.54    1.10
   5   9  -3   13.57    1.01
  -5   9   3   12.15    0.99
   5  -9  -3   11.43    1.04
  -5   9  -3   13.33    1.04
   5   9   3   12.42    1.01
   6  -9   3    0.75    0.67
  -6   9   3    1.42    0.55
   6   9  -3    1.89    0.57
   6   9   3    1.46    0.62
   6  -9  -3    0.69    0.64
   7  -9   3    6.04    1.05
   7   9  -3    6.49    0.81
   7  -9  -3    5.58    1.15
   7   9   3    7.19    0.93
   8   9  -3    0.03    0.75
   8  -9   3    0.20    0.89
   8  -9  -3    1.23    0.89
   8   9   3    0.03    0.81
   0 -10   3    0.93    0.43
   0 -10  -3    0.65    0.39
   0  10   3    0.96    0.31
   0  10   3    1.35    0.37
   0  10  -3    1.34    0.39
   1 -10   3   15.84    1.18
  -1  10   3   14.66    1.06
   1  10  -3   17.43    1.08
   1  10   3   15.71    1.10
  -1 -10   3   17.34    1.13
   1  10   3   17.93    1.08
   1 -10  -3   17.51    1.15
  -1  10  -3   17.32    1.09
   2 -10   3    1.71    0.58
   2  10  -3    2.16    0.44
  -2  10   3    1.52    0.41
   2 -10  -3    2.09    0.53
  -2 -10   3    1.21    0.43
   2  10   3    2.51    0.48
  -2  10  -3    2.34    0.45
   2  10   3    2.33    0.41
   3  10  -3    6.41    0.62
   3 -10   3    6.13    0.78
   3  10  -3    6.52    0.59
  -3  10   3    6.08    0.63
   3  10   3    5.58    0.66
   3  10   3    5.61    0.62
  -3  10  -3    6.60    0.65
   3 -10  -3    5.54    0.73
  -3 -10   3    6.21    0.77
   4  10  -3    2.05    0.47
   4 -10   3    2.18    0.66
   4  10  -3    3.49    0.50
  -4  10   3    2.29    0.51
  -4  10  -3    2.59    0.53
   4 -10  -3    1.82    0.63
   4  10   3    1.01    0.52
   4  10   3    2.48    0.46
   5 -10   3    0.74    0.68
  -5  10   3    1.44    0.53
   5  10  -3    1.88    0.54
  -5  10  -3    1.39    0.62
   5 -10  -3    0.85    0.71
   5  10   3    2.38    0.62
  -6  10   3    1.10    0.59
   6  10  -3    0.04    0.58
   6 -10   3    0.19    0.72
  -6  10  -3    0.94    0.65
   6 -10  -3   -0.17    0.69
   6  10   3    0.04    0.56
   7  10  -3    0.20    0.70
   7 -10   3    0.15    0.89
   7 -10  -3    0.49    0.83
   7  10   3   -0.36    0.74
   0  11  -3    3.09    0.48
   0  11   3    3.10    0.49
   0 -11   3    2.10    0.52
   1  11  -3    0.55    0.40
  -1  11   3    0.88    0.45
   1 -11   3    0.76    0.56
  -1  11  -3    1.33    0.45
   1 -11  -3    0.56    0.49
   1  11   3    1.44    0.44
  -1 -11   3    0.83    0.45
  -2  11   3    0.81    0.44
   2  11  -3    1.09    0.43
   2 -11   3    1.22    0.58
  -2 -11   3    1.49    0.47
  -2  11  -3    1.66    0.47
   2  11   3    1.87    0.51
   2 -11  -3    1.69    0.65
   2  11   3    1.76    0.44
   3  11  -3    7.43    0.71
   3 -11   3    5.12    0.78
  -3  11   3    5.65    0.65
   3  11   3    5.33    0.71
  -3  11  -3    5.57    0.65
   3  11   3    5.31    0.64
   3 -11  -3    6.27    0.78
   4  11  -3    1.28    0.48
   4 -11   3    0.37    0.62
  -4  11   3    0.70    0.47
   4  11   3    0.37    0.44
   4 -11  -3    0.55    0.68
   4  11   3   -0.08    0.54
  -4  11  -3    0.31    0.49
   5 -11   3    1.00    0.78
   5  11  -3    2.55    0.57
  -5  11   3    3.29    0.63
   5  11   3    1.88    0.70
   5  11   3    3.90    0.60
   5 -11  -3    2.19    0.83
  -5  11  -3    3.24    0.73
   6  11  -3    1.04    0.96
  -6  11   3    0.65    0.69
   6  11  -3    0.71    0.93
   6 -11   3   -0.49    0.84
   6 -11  -3    0.68    0.81
   6  11   3   -0.08    0.70
  -6  11  -3    1.35    0.68
   0  12   3    4.03    0.59
   0 -12   3    4.31    0.66
   0  12  -3    4.12    0.59
   1 -12   3    2.53    0.64
   1  12  -3    1.99    0.54
  -1  12   3    2.65    0.54
   1  12   3    2.34    0.53
  -1 -12   3    2.85    0.60
  -1  12  -3    2.64    0.59
   1 -12  -3    3.54    0.70
  -2  12   3    5.57    0.67
   2  12  -3    4.93    0.64
   2 -12   3    6.24    0.79
   2  12   3    4.11    0.60
   2 -12  -3    6.42    0.79
  -2  12  -3    4.94    0.68
  -3  12   3    0.84    0.52
   3  12  -3    1.80    0.58
   3 -12   3    0.85    0.62
   3 -12  -3    0.78    0.70
  -3  12  -3    1.01    0.52
   3  12   3    0.72    0.48
  -4  12   3   -0.28    0.57
   4  12  -3    0.74    0.56
   4 -12   3    0.74    0.75
   4 -12  -3    0.13    0.76
   4  12   3    0.05    0.52
  -4  12  -3    0.53    0.62
  -5  12   3    0.25    0.65
   5  12   3   -0.11    0.53
  -5  12  -3   -0.56    0.67
   5  12   3   -0.49    0.71
   5 -12  -3   -0.78    0.83
  -6  12   3    0.58    0.69
   6  12  -3    1.19    0.72
   6 -12   3   -0.27    0.86
   6 -12  -3   -0.73    0.94
   6  12   3    1.59    0.73
   6  12   3   -0.13    1.29
  -6  12  -3    1.33    0.82
   0 -13   3    6.99    0.82
   0  13  -3    5.33    0.77
   0  13   3    6.65    0.78
   1 -13   3    0.96    0.68
   1  13  -3    2.32    0.63
  -1  13   3    0.99    0.57
   1  13   3    0.69    0.59
  -1  13  -3    1.64    0.56
   2  13  -3    3.64    0.69
   2 -13   3    2.72    0.79
  -2  13   3    3.55    0.65
   2 -13  -3    5.73    1.26
   2  13   3    3.39    0.68
  -2  13  -3    3.90    0.65
   3  13  -3    1.08    0.56
   3 -13   3    0.99    0.75
  -3  13   3    0.95    0.58
  -3  13  -3    2.07    0.61
   3  13   3    0.80    0.56
   3 -13  -3    1.65    0.78
   4 -13   3    4.38    1.12
  -4  13   3    3.36    0.76
   4  13  -3    3.21    0.69
   4  13   3    3.86    0.71
   4 -13  -3    3.54    0.97
  -4  13  -3    2.67    0.77
  -5  13   3    2.43    0.81
   5  13  -3    1.90    0.76
   5 -13   3    1.39    0.99
   5 -13  -3    1.18    1.02
   5  13   3    2.06    0.70
  -5  13  -3    1.89    0.81
   0  14  -3    0.96    0.61
   1  14  -3   -0.06    0.61
   1 -14   3   -0.79    0.74
  -2  14   3    2.04    0.68
   2  14  -3    3.85    0.72
   2 -14   3    4.01    0.91
  -2  14  -3    4.71    0.74
   2  14   3    3.15    0.75
   3  14  -3    0.90    0.71
  -3  14   3    2.23    0.75
   3 -14   3    1.53    0.91
  -3  14  -3    1.38    0.67
   3  14   3    2.77    0.74
  -4  14   3    0.91    0.77
   4 -14   3    1.16    0.97
   4  14  -3    0.69    0.74
  -4  14  -3   -0.01    0.69
   4 -14  -3    1.43    1.08
   4  14   3    0.40    0.64
   0  15  -3   -0.14    0.64
   0  15   3    0.28    0.66
  -1  15   3    3.61    0.78
   1  15  -3    4.14    0.79
  -1  15  -3    4.64    0.81
   1  15   3    4.77    0.87
   2  15  -3    2.60    0.83
  -2  15   3    1.74    0.77
   2  15   3    2.41    0.81
  -2  15  -3    1.77    0.74
   0   0   4  424.27   22.39
   0   0  -4  445.85   22.41
   1   0  -4   94.03    4.84
  -1   0   4   98.88    4.89
   1   0  -4   97.54    4.89
   1   0   4   95.35    4.88
  -1   0   4   96.65    4.90
   1   0   4   96.94    4.87
  -1   0  -4   93.44    4.87
   1   0  -4   95.35    4.88
  -1   0  -4   94.55    4.87
   2   0  -4    6.85    0.52
   2   0  -4    6.42    0.50
   2   0  -4    7.28    0.44
   2   0   4    7.63    0.46
  -2   0  -4    7.81    0.47
  -2   0   4    7.83    0.52
   2   0   4    6.77    0.44
  -2   0  -4    6.37    0.45
   3   0   4   25.80    1.33
  -3   0   4   23.99    1.41
   3   0   4   25.15    1.32
  -3   0  -4   23.35    1.31
   3   0  -4   23.81    1.32
   4   0  -4   15.82    0.90
  -4   0   4   15.66    1.06
   4   0   4   14.97    0.90
   4   0   4   14.28    0.91
   5   0   4    8.25    0.67
   5   0  -4    8.78    0.63
   5   0   4    9.04    0.69
  -5   0   4    8.94    0.85
   6   0  -4    3.55    0.46
   6   0   4    3.34    0.47
   6   0   4    3.85    0.50
  -6   0   4    2.90    0.81
   7   0  -4    1.45    0.46
  -7   0   4    2.39    0.85
   7   0   4    2.75    0.56
   7   0   4    2.20    0.50
  -8   0   4   -0.27    0.93
   8   0   4    0.15    0.51
   8   0   4   -0.44    0.58
   8   0  -4    0.15    0.52
   9   0  -4    1.16    0.72
   9   0   4    0.79    0.64
   0   1  -4    0.18    0.12
   0   1  -4    0.24    0.06
   0  -1  -4   -0.29    0.11
   0  -1  -4    0.07    0.15
   0  -1   4    0.13    0.05
   0   1  -4    0.10    0.13
   0   1   4   -0.21    0.14
   0  -1   4    0.06    0.14
   0   1   4   -0.03    0.12
   0  -1   4   -0.11    0.10
   1  -1   4   19.71    1.01
  -1   1   4   19.99    1.04
   1   1  -4   19.15    1.05
  -1  -1  -4   18.93    1.03
   1   1  -4   19.18    1.04
  -1  -1  -4   16.73    1.00
   1  -1   4   20.18    1.03
  -1   1   4   19.71    1.00
   1  -1   4   20.29    1.05
   1  -1  -4   18.73    1.03
   1   1   4   19.79    1.01
  -1  -1   4   19.35    1.05
  -1   1  -4   19.29    1.02
  -1  -1   4   18.36    1.05
   1  -1  -4   18.67    1.02
  -1   1  -4   18.79    1.04
   1  -1  -4   19.81    0.99
   1   1   4   19.96    1.05
   1  -1  -4   19.19    1.06
   2  -1   4   47.45    2.47
   2   1  -4   47.63    2.47
  -2  -1  -4   46.21    2.45
  -2   1   4   45.06    2.44
   2  -1   4   46.40    2.43
  -2   1   4   48.50    2.49
   2  -1   4   46.62    2.45
   2   1  -4   46.51    2.48
  -2   1  -4   46.82    2.43
   2  -1  -4   49.39    2.42
   2  -1  -4   48.75    2.45
   2   1   4   48.00    2.42
   2   1   4   47.04    2.45
  -2  -1   4   47.36    2.50
  -2  -1   4   45.84    2.47
   2  -1  -4   47.41    2.46
  -3  -1  -4    8.26    0.52
  -3   1   4    8.81    0.70
   3  -1   4    8.44    0.58
   3  -1   4    8.37    0.68
   3   1  -4    8.72    0.54
   3   1   4    8.78    0.56
   3  -1  -4    8.85    0.56
   3   1   4    9.24    0.54
  -3   1  -4    7.88    0.57
  -3  -1   4    9.05    0.69
   3  -1  -4    8.63    0.56
  -4   1   4    3.87    0.55
   4  -1   4    4.41    0.42
   4  -1   4    3.18    0.34
  -4  -1  -4    3.51    0.34
   4   1  -4    3.08    0.32
   4   1   4    3.95    0.36
   4  -1  -4    3.48    0.34
  -4  -1   4    5.47    0.60
   4   1   4    3.14    0.34
  -5   1   4    7.78    0.81
   5  -1   4    6.97    0.61
   5  -1   4    7.92    0.59
   5   1  -4    8.09    0.60
   5   1   4    7.85    0.64
  -5  -1   4    6.86    0.80
   5  -1  -4    7.19    0.60
   5   1   4    7.29    0.59
   6  -1   4    1.02    0.43
   6  -1   4    0.23    0.34
  -6   1   4    0.07    0.57
   6   1  -4    0.52    0.33
   6  -1  -4    0.28    0.32
   6   1   4    0.54    0.35
   6   1   4    0.46    0.36
   7   1  -4    1.55    0.46
  -7   1   4    0.67    0.73
   7  -1   4    2.00    0.44
  -7  -1   4    1.91    0.82
   7   1   4    1.73    0.45
   7  -1  -4    1.62    0.49
   7   1   4    2.05    0.51
   8  -1   4    7.93    0.89
   8   1  -4    9.16    0.86
  -8   1   4    7.66    1.23
   8  -1   4    8.22    0.84
   8   1   4    7.66    1.02
   8   1   4    8.83    0.87
  -8  -1   4    5.66    1.12
   8  -1  -4    8.03    0.88
   9   1  -4    2.67    0.79
   9  -1   4    1.76    0.82
   9   1  -4    2.41    0.75
   9  -1   4    3.37    0.75
  -9   1   4    1.75    1.21
   9   1   4    2.50    0.80
   9  -1  -4    3.06    0.80
   9  -1  -4    3.70    0.78
   0   2  -4    4.54    0.28
   0  -2   4    4.52    0.36
   0  -2  -4    4.52    0.28
   0   2  -4    4.15    0.34
   0  -2  -4    5.65    0.37
   0   2   4    4.31    0.28
   0   2  -4    4.61    0.30
   0  -2   4    4.67    0.30
   0  -2   4    4.75    0.28
   0   2   4    5.66    0.37
  -1   2   4   33.68    1.80
   1   2  -4   34.65    1.82
   1  -2   4   34.19    1.79
   1  -2   4   34.87    1.83
  -1  -2  -4   34.77    1.77
   1   2  -4   34.41    1.83
  -1   2   4   34.36    1.82
  -1   2   4   34.10    1.79
   1  -2   4   35.01    1.79
   1   2   4   34.86    1.77
  -1   2  -4   35.24    1.78
   1  -2  -4   33.79    1.80
  -1   2  -4   36.92    1.85
  -1  -2   4   35.53    1.83
   1  -2  -4   34.38    1.82
  -1   2  -4   35.70    1.80
   1   2   4   35.02    1.83
   1  -2  -4   34.22    1.79
  -1  -2   4   35.06    1.83
  -2  -2  -4   12.77    0.66
  -2   2   4   11.95    0.72
  -2   2   4   12.98    0.77
   2   2  -4   12.67    0.76
  -2  -2  -4   12.39    0.73
   2  -2   4   13.93    0.77
   2   2  -4   11.74    0.79
   2  -2   4   13.14    0.72
   2  -2   4   12.59    0.69
  -2   2   4   12.29    0.70
   2  -2  -4   13.08    0.70
   2  -2  -4   12.78    0.72
   2   2   4   12.89    0.73
  -2   2  -4   11.61    0.76
  -2  -2   4   12.74    0.77
  -2   2  -4   12.62    0.69
   2   2   4   12.00    0.67
  -2  -2   4   12.17    0.79
   3  -2   4   16.63    0.92
   3  -2   4   16.19    1.04
  -3   2   4   17.19    1.03
  -3  -2  -4   16.31    0.89
   3  -2   4   17.51    0.98
   3   2  -4   17.66    0.94
   3  -2  -4   17.11    0.95
   3   2   4   15.98    0.95
  -3  -2   4   18.51    1.08
   3  -2  -4   14.57    0.92
   3   2   4   16.27    0.90
   4  -2   4    2.59    0.28
   4  -2   4    1.74    0.35
   4   2  -4    1.99    0.28
  -4   2   4    1.47    0.46
  -4  -2   4    2.37    0.48
   4   2   4    2.38    0.27
   4  -2  -4    1.84    0.30
   4   2   4    1.86    0.29
   5   2  -4    2.06    0.33
  -5   2   4    1.29    0.57
   5  -2   4    2.20    0.45
   5  -2   4    2.79    0.36
   5   2   4    2.72    0.35
   5  -2  -4    1.16    0.32
  -5  -2   4    1.42    0.54
   5   2   4    1.31    0.33
   6  -2   4   14.11    1.06
   6  -2   4   15.01    0.98
   6   2  -4   13.98    0.94
  -6   2   4   13.64    1.23
   6   2   4   14.09    0.96
  -6  -2   4   15.52    1.29
   6   2   4   13.64    1.08
   7  -2   4   -0.02    0.52
   7  -2   4    0.02    0.35
   7   2  -4    0.00    0.38
  -7   2   4    0.44    0.71
  -7  -2   4    0.48    0.71
   7   2   4    0.11    0.43
   7  -2  -4    0.56    0.47
   7   2   4   -0.02    0.43
   8  -2   4   -0.63    0.62
  -8   2   4   -0.29    0.94
   8  -2   4    0.42    0.53
   8   2  -4    0.71    0.54
   8   2  -4    0.84    0.48
   8   2   4    0.21    0.49
   8  -2  -4   -0.02    0.56
   9   2  -4    6.19    0.88
   9  -2   4    5.81    1.01
   9   2  -4    7.80    0.94
  -9   2   4    4.51    1.30
   9  -2   4    7.34    0.89
   9  -2  -4    7.65    0.99
   9   2   4    7.10    1.06
   0  -3  -4   28.90    1.50
   0   3   4   29.53    1.55
   0   3   4   29.15    1.51
   0  -3  -4   29.09    1.55
   0  -3   4   29.19    1.50
   0   3  -4   30.28    1.51
   0   3  -4   28.59    1.49
   0  -3   4   27.87    1.50
   0  -3   4   28.31    1.55
   0   3  -4   28.85    1.55
   0   3   4   29.17    1.50
  -1  -3  -4  133.20    6.70
   1  -3   4  132.64    6.78
   1  -3   4  146.06    6.72
  -1  -3  -4  130.80    6.71
  -1   3   4  131.92    6.76
  -1   3   4  128.26    6.74
  -1   3   4  132.86    6.75
   1   3  -4  129.86    6.73
   1   3  -4  128.96    6.77
   1   3  -4  132.26    6.76
  -1  -3   4  134.65    6.77
  -1   3  -4  132.62    6.74
  -1  -3   4  131.79    6.77
   1  -3  -4  127.37    6.74
  -1   3  -4  133.63    6.78
   1   3   4  138.33    6.77
   1  -3  -4  133.57    6.75
  -1   3  -4  132.59    6.71
   2   3  -4   41.08    2.14
  -2   3   4   40.27    2.11
   2  -3   4   40.13    2.09
   2  -3   4   39.50    2.05
   2  -3   4   38.67    2.08
   2  -3   4   41.80    2.13
  -2   3   4   41.29    2.07
   2   3  -4   40.21    2.10
   2   3   4   38.61    2.10
   2  -3  -4   38.67    2.07
   2  -3  -4   38.48    2.09
  -2  -3   4   38.92    2.15
   2  -3  -4   40.68    2.09
  -2  -3   4   40.19    2.11
  -3   3   4   19.04    1.10
  -3   3   4   16.96    0.99
   3  -3   4   17.61    0.97
   3  -3   4   17.91    1.07
  -3  -3  -4   17.49    0.92
   3  -3   4   18.16    1.08
   3   3   4   17.82    1.03
  -3  -3   4   17.97    1.15
   3   3   4   17.39    0.93
   3  -3  -4   16.75    1.00
  -3  -3   4   18.12    1.05
   4  -3   4    1.21    0.37
  -4  -3  -4    1.72    0.21
   4  -3   4    1.34    0.24
  -4   3   4    1.72    0.46
   4   3  -4    1.61    0.25
   4   3   4    1.66    0.23
   4   3   4    1.73    0.29
   4  -3  -4    1.85    0.30
  -4  -3   4    1.52    0.51
   5  -3   4   25.89    1.53
  -5   3   4   25.72    1.61
   5  -3   4   23.68    1.42
   5   3  -4   24.72    1.41
  -5  -3   4   26.12    1.68
   5   3   4   24.40    1.38
   5  -3  -4   24.98    1.48
   5   3   4   26.32    1.48
   6  -3   4    3.36    0.44
   6   3  -4    3.58    0.44
   6  -3   4    4.35    0.59
  -6   3   4    3.12    0.73
   6  -3  -4    2.77    0.50
   6   3   4    3.46    0.48
   6   3   4    2.75    0.42
  -6  -3   4    2.79    0.77
   7  -3   4    9.09    0.88
   7   3  -4    7.74    0.76
  -7   3   4    8.82    1.03
   7  -3   4    8.76    0.74
  -7  -3   4    8.34    1.06
   7   3   4    6.82    0.73
   7  -3  -4    6.83    0.77
   8   3  -4    0.75    0.52
   8   3  -4    0.61    0.52
  -8   3   4   -0.67    0.93
   8  -3   4    1.44    0.58
   8  -3   4    0.49    0.66
   8  -3  -4    0.78    0.63
   8   3   4    0.38    0.51
   9  -3   4    0.00    0.67
   9   3  -4    0.08    0.66
   9  -3   4   -0.11    0.83
  -9   3   4    0.02    1.14
   9   3   4    0.20    0.63
   9  -3  -4   -1.06    1.19
   0  -4   4   78.11    4.10
   0  -4  -4   78.53    4.08
   0   4  -4   81.10    4.07
   0   4   4   81.97    4.07
   0   4  -4   78.92    4.03
   0  -4   4   75.34    4.06
   0  -4   4   79.12    4.05
   0   4   4   80.93    4.04
   0  -4  -4   80.82    4.05
   0   4  -4   78.98    4.10
   0   4   4   80.68    4.09
  -1   4   4    5.79    0.39
   1  -4   4    4.56    0.43
   1   4  -4    5.82    0.37
   1   4  -4    5.18    0.41
   1  -4   4    5.25    0.38
  -1   4   4    5.03    0.38
  -1   4   4    5.32    0.38
  -1  -4  -4    5.53    0.31
  -1  -4  -4    5.25    0.43
   1   4  -4    4.63    0.41
  -1   4  -4    5.63    0.40
   1   4   4    5.55    0.42
   1  -4  -4    5.64    0.45
   1  -4  -4    5.33    0.38
   1  -4  -4    5.20    0.37
  -1  -4   4    5.78    0.44
  -1  -4   4    5.24    0.42
   2  -4   4    5.41    0.40
  -2   4   4    5.99    0.41
   2   4  -4    6.03    0.52
   2  -4   4    5.34    0.34
   2   4  -4    5.81    0.46
  -2   4   4    5.45    0.48
   2  -4   4    5.52    0.47
  -2   4  -4    5.64    0.42
   2   4   4    5.07    0.43
   2  -4  -4    5.61    0.41
   2  -4  -4    5.72    0.45
  -2  -4   4    4.66    0.48
  -2  -4   4    5.42    0.47
   3  -4   4   93.10    4.84
   3  -4   4   94.40    4.75
  -3   4   4   89.98    4.78
  -3   4   4   92.20    4.84
   3  -4   4   93.53    4.79
   3   4   4   92.17    4.81
  -3   4  -4   92.81    4.80
   3  -4  -4   94.60    4.81
  -3  -4   4   91.60    4.88
  -3  -4   4   96.27    4.82
   4  -4   4    2.00    0.42
  -4   4   4    0.82    0.40
  -4   4   4    1.47    0.31
   4   4  -4    1.78    0.25
   4  -4   4    1.42    0.25
   4   4   4    1.85    0.28
  -4  -4   4    0.65    0.47
   4  -4  -4    2.00    0.35
   4   4   4    1.49    0.20
   4   4   4    1.25    0.31
  -5   4   4    6.21    0.75
   5  -4   4    6.84    0.56
   5   4  -4    7.16    0.57
   5  -4   4    7.96    0.73
   5  -4  -4    6.69    0.62
  -5  -4   4    6.76    0.87
   5   4   4    7.66    0.53
   5   4   4    6.79    0.61
   6  -4   4    3.25    0.45
   6  -4   4    2.36    0.55
   6   4  -4    3.28    0.44
  -6   4   4    3.17    0.74
   6   4   4    4.04    0.54
   6  -4  -4    4.37    0.57
  -6  -4   4    2.72    0.74
   7  -4   4    7.38    0.80
  -7   4   4   10.36    1.14
   7  -4   4    7.16    0.86
   7   4  -4    7.81    0.75
   7  -4  -4    7.19    0.82
   7   4   4    7.60    0.76
   8  -4   4    7.76    0.83
   8  -4   4    7.73    0.97
  -8   4   4    7.72    1.26
   8   4  -4    6.44    0.77
   8   4  -4    8.78    0.86
   8  -4  -4    7.41    0.95
   8   4   4    8.41    0.90
   9  -4   4    0.67    0.69
  -9   4   4    0.92    1.20
   9   4  -4    1.75    0.74
   9  -4  -4   -0.13    0.80
   9   4   4    0.89    0.67
   0   5   4   21.74    1.18
   0   5  -4   21.57    1.12
   0  -5  -4   20.74    1.21
   0   5   4   21.75    1.22
   0  -5  -4   21.39    1.17
   0   5   4   21.12    1.15
   0   5  -4   21.84    1.12
   0   5  -4   22.79    1.19
   0  -5   4   23.72    1.24
  -1   5   4   37.10    1.98
   1  -5   4   37.12    2.02
   1   5  -4   36.16    1.98
  -1   5   4   37.51    1.97
  -1   5   4   35.49    1.97
  -1  -5  -4   38.45    1.92
   1   5  -4   38.00    1.97
   1   5   4   34.75    1.97
   1  -5  -4   37.71    1.98
   1   5   4   38.11    1.92
  -1  -5   4   37.62    2.00
   1  -5  -4   36.43    2.00
   1   5   4   39.77    2.01
  -1  -5   4   39.67    2.00
  -1   5  -4   39.09    1.99
   2   5  -4    9.54    0.76
   2  -5   4    9.16    0.73
   2  -5   4    9.56    0.54
  -2   5   4    9.03    0.64
  -2   5   4    9.67    0.65
   2  -5  -4   10.79    0.65
   2  -5  -4   10.03    0.69
  -2   5  -4   10.45    0.64
   2   5   4   10.61    0.67
  -2  -5   4   11.03    0.68
  -3   5   4   24.44    1.44
   3  -5   4   25.18    1.45
   3  -5   4   26.11    1.37
   3  -5   4   25.49    1.31
  -3   5   4   25.30    1.38
  -3   5  -4   24.66    1.39
  -3  -5   4   23.54    1.41
   3  -5  -4   22.82    1.39
   3   5   4   24.80    1.40
  -3  -5   4   25.62    1.53
   4  -5   4   11.40    0.81
  -4   5   4    9.13    0.71
   4   5  -4    8.23    0.63
  -4   5   4   10.50    0.83
  -4  -5   4    7.68    0.82
   4   5   4    8.62    0.54
  -4   5  -4   10.59    0.77
   4  -5  -4   10.12    0.74
   4   5   4    8.65    0.72
   5  -5   4    2.40    0.53
   5   5  -4    3.20    0.37
  -5   5   4    2.51    0.59
   5  -5   4    2.63    0.36
   5   5   4    2.41    0.45
   5  -5  -4    3.17    0.49
  -5  -5   4    2.40    0.71
  -6   5   4   14.69    1.21
   6   5  -4   13.07    0.97
   6   5  -4   12.71    0.89
   6  -5   4   10.83    0.99
   6  -5   4   12.69    0.87
   6  -5  -4   12.92    0.98
   6   5   4   11.23    0.93
   7   5  -4    0.70    0.47
  -7   5   4    0.48    0.83
   7   5  -4    0.99    0.46
   7  -5   4    1.39    0.53
   7  -5   4    0.92    0.65
   7  -5  -4    0.33    0.56
   7   5   4    0.59    0.47
   8  -5   4   -0.39    0.64
  -8   5   4   -1.28    0.99
   8   5  -4   -0.05    0.52
   8  -5  -4   -0.17    0.60
   8   5   4   -0.40    0.51
  -9   5   4    1.96    1.33
   9  -5   4    1.72    0.95
   9   5  -4    1.55    0.71
   9  -5  -4    0.47    0.85
   9   5   4    1.42    0.78
   0  -6  -4   22.82    1.30
   0   6  -4   22.41    1.16
   0   6  -4   22.37    1.26
   0   6   4   22.83    1.27
   0  -6  -4   22.44    1.23
   0   6   4   23.28    1.25
   0   6  -4   22.30    1.16
   0  -6   4   23.34    1.29
  -1   6   4    4.00    0.37
   1  -6   4    4.51    0.45
   1   6  -4    4.69    0.38
  -1  -6  -4    4.67    0.33
   1   6  -4    4.29    0.39
   1   6  -4    4.71    0.33
  -1  -6   4    4.18    0.42
   1   6   4    5.35    0.45
   1  -6  -4    4.43    0.40
   1   6   4    4.18    0.30
   1  -6  -4    3.95    0.43
   1   6   4    4.65    0.39
  -1   6  -4    5.38    0.41
   2   6  -4    8.26    0.56
   2  -6   4    8.02    0.67
   2   6  -4    7.49    0.56
  -2   6   4    8.23    0.60
   2   6  -4    7.28    0.71
  -2   6   4    7.66    0.58
  -2   6  -4    8.10    0.58
  -2  -6   4    8.83    0.62
   2  -6  -4    8.53    0.62
   2   6   4    7.85    0.63
  -3   6   4    7.10    0.56
   3  -6   4    7.31    0.45
   3   6  -4    6.99    0.55
  -3   6   4    7.31    0.63
   3  -6   4    9.52    0.71
  -3  -6   4    6.84    0.61
   3  -6  -4    7.48    0.62
   3   6   4    7.84    0.62
  -3   6  -4    6.56    0.57
  -4   6   4   10.33    0.74
   4  -6   4    9.63    0.82
  -4   6   4    9.02    0.80
   4   6  -4    8.66    0.70
   4  -6   4    8.14    0.58
  -4   6  -4   10.36    0.76
   4   6   4    9.15    0.75
   4  -6  -4    8.87    0.72
   5   6  -4    4.21    0.44
   5  -6   4    4.48    0.42
   5   6  -4    4.30    0.49
   5  -6   4    4.79    0.62
  -5   6   4    3.52    0.67
  -5   6   4    5.27    0.57
   5  -6  -4    3.83    0.55
   5   6   4    3.87    0.51
  -6   6   4    1.42    0.68
   6   6  -4    1.84    0.40
   6  -6   4    1.68    0.62
   6   6  -4    0.97    0.41
   6  -6  -4    1.54    0.51
   6   6   4    1.03    0.44
  -7   6   4   -0.64    0.83
   7  -6   4   -0.37    0.65
   7   6  -4    0.14    0.51
   7   6   4    0.56    0.54
   7  -6  -4    0.14    0.55
   8   6  -4    4.64    0.79
  -8   6   4    3.71    1.21
   8  -6   4    3.54    0.93
   8   6   4    2.90    0.83
   8  -6  -4    4.57    0.98
   9   6  -4   -0.25    0.68
   9  -6   4    0.34    0.99
   9  -6  -4    0.17    0.92
   9   6   4    0.38    0.80
   0  -7   4    3.80    0.45
   0   7   4    3.19    0.32
   0  -7  -4    3.51    0.34
   0   7  -4    2.90    0.22
   0   7   4    3.15    0.37
   0   7   4    2.80    0.36
   0   7  -4    3.36    0.21
   0   7  -4    4.03    0.37
   1  -7   4   26.00    1.48
  -1  -7  -4   26.35    1.34
   1   7  -4   24.76    1.33
   1   7  -4   25.16    1.39
  -1   7   4   24.80    1.40
  -1   7   4   24.25    1.37
   1   7  -4   24.88    1.40
  -1  -7   4   26.07    1.44
   1   7   4   26.18    1.44
   1   7   4   24.77    1.40
   1   7   4   24.49    1.32
   1  -7  -4   25.52    1.41
  -1   7  -4   24.09    1.40
  -2   7   4    2.80    0.37
   2   7  -4    2.32    0.33
   2   7  -4    1.65    0.26
  -2   7   4    2.17    0.33
   2  -7   4    2.57    0.47
  -2   7  -4    2.03    0.36
   2   7   4    2.33    0.36
  -2  -7   4    2.94    0.39
   2  -7  -4    2.02    0.38
   3  -7   4    6.46    0.63
  -3   7   4    6.25    0.59
   3   7  -4    5.50    0.48
  -3   7   4    5.24    0.53
   3   7   4    5.32    0.55
  -3   7  -4    5.60    0.54
  -3  -7   4    5.82    0.55
   3  -7  -4    6.81    0.60
  -4   7   4    7.43    0.61
  -4   7   4    7.50    0.73
   4   7  -4    6.56    0.58
   4  -7  -4    7.23    0.70
  -4   7  -4    6.05    0.69
  -4  -7   4    8.34    0.67
   4   7   4    6.53    0.62
  -5   7   4    1.02    0.60
  -5   7   4    1.29    0.42
   5   7  -4    1.96    0.36
   5  -7   4    0.82    0.52
   5  -7  -4    0.88    0.45
   5   7   4    2.08    0.45
  -5   7  -4    2.05    0.48
  -6   7   4    0.68    0.74
   6   7  -4    0.43    0.46
   6  -7   4    0.59    0.61
   6  -7  -4    0.63    0.57
   6   7   4    0.66    0.50
   7  -7   4    2.31    0.80
   7   7  -4    2.40    0.57
  -7   7   4    2.50    0.93
   7   7   4    2.53    0.66
   7  -7  -4    2.59    0.77
   8  -7   4   -0.19    0.87
   8  -7  -4   -0.44    0.83
   8   7   4   -0.45    0.60
   0   8  -4    4.68    0.47
   0  -8  -4    5.00    0.44
   0  -8   4    5.19    0.54
   0   8   4    3.54    0.43
   0   8   4    4.19    0.44
  -1   8   4    2.96    0.40
   1  -8   4    2.48    0.44
   1   8  -4    2.58    0.26
  -1  -8  -4    2.89    0.30
  -1   8   4    2.72    0.32
   1   8  -4    2.14    0.36
  -1   8  -4    3.21    0.39
   1   8   4    2.91    0.36
  -1  -8   4    2.50    0.41
   1   8   4    2.03    0.41
   1  -8  -4    3.18    0.42
  -2   8   4    6.53    0.55
   2   8  -4    7.93    0.59
  -2   8   4    6.66    0.57
   2   8  -4    6.45    0.51
   2  -8   4    5.84    0.64
  -2  -8   4    6.37    0.59
   2  -8  -4    5.99    0.59
   2   8   4    6.57    0.60
  -2   8  -4    6.72    0.58
   2   8   4    6.67    0.56
   3   8  -4    9.37    0.72
  -3   8   4    9.24    0.74
   3  -8   4    9.44    0.83
  -3   8   4    9.88    0.77
   3   8  -4   10.08    0.75
   3  -8  -4   10.72    0.83
  -3  -8   4    9.52    0.77
  -3   8  -4   10.67    0.77
   3   8   4   10.13    0.82
  -4   8   4    0.69    0.52
  -4   8   4    2.34    0.45
   4   8  -4    0.96    0.34
   4  -8   4    3.07    0.59
   4  -8  -4    1.53    0.51
  -4  -8   4    1.98    0.45
  -4   8  -4    2.56    0.50
   4   8   4    1.65    0.45
   5   8  -4   14.34    1.05
  -5   8   4   15.19    1.20
  -5   8   4   14.28    1.04
   5  -8   4   11.25    1.09
   5  -8  -4   18.82    1.24
  -5   8  -4   16.04    1.08
   5   8   4   12.73    1.05
   6  -8   4    3.91    0.80
   6   8  -4    3.15    0.60
   6  -8  -4    4.30    0.80
   6   8   4    4.99    0.71
   7   8  -4    0.08    0.58
   7  -8   4    0.27    0.77
   7   8   4    0.42    0.63
   7  -8  -4   -0.25    0.65
   8  -8   4    0.98    0.96
   8   8  -4    1.40    0.75
   8   8   4    2.37    0.81
   8  -8  -4    0.59    0.91
   0   9  -4    2.28    0.43
   0   9   4    2.40    0.39
   0  -9  -4    2.34    0.39
   0   9   4    2.93    0.40
   0  -9   4    2.61    0.48
   1  -9   4    2.19    0.49
  -1  -9  -4    2.25    0.32
   1   9  -4    3.02    0.42
  -1   9   4    2.58    0.40
  -1   9   4    2.22    0.33
   1  -9  -4    2.45    0.45
  -1   9  -4    2.90    0.45
   1   9   4    2.79    0.42
  -1  -9   4    2.46    0.44
   1   9   4    1.96    0.44
   2   9  -4   13.02    0.83
   2  -9   4   12.81    1.02
  -2   9   4   12.71    0.89
  -2   9   4   14.45    0.95
   2   9  -4   14.00    0.92
  -2  -9   4   13.25    0.94
   2   9   4   12.99    0.96
   2  -9  -4   12.67    1.01
  -2   9  -4   14.03    1.03
   3   9  -4    4.22    0.50
   3  -9   4    3.72    0.62
   3   9  -4    4.66    0.47
  -3   9   4    4.05    0.51
  -3   9   4    4.39    0.56
  -3  -9   4    5.02    0.57
   3  -9  -4    5.93    0.66
   3   9   4    5.29    0.54
  -3   9  -4    5.36    0.59
   3   9   4    5.59    0.62
  -4   9   4    9.58    0.81
   4   9  -4    9.59    0.76
   4  -9   4   10.56    0.96
   4   9  -4    9.53    0.76
  -4  -9   4   10.39    0.84
  -4   9  -4    7.39    0.76
   4   9   4    9.11    0.83
   4  -9  -4   10.07    0.92
   5   9  -4    0.14    0.41
   5  -9   4    0.60    0.62
  -5   9   4    0.55    0.45
   5  -9  -4    0.92    0.63
   5   9   4   -0.28    0.49
  -5   9  -4    1.47    0.50
   6  -9   4   -0.02    0.65
   6   9  -4    0.72    0.48
  -6   9   4    0.57    0.58
   6   9   4    1.15    0.61
   6  -9  -4    0.29    0.70
   7  -9   4    3.41    0.88
   7   9  -4    2.94    0.74
   7  -9  -4    4.15    0.98
   7   9   4    4.52    0.84
   0  10   4   11.96    0.91
   0 -10   4   12.43    0.96
   0  10  -4   11.46    0.91
   0 -10  -4   13.11    0.91
   0  10   4   12.11    0.85
  -1  10   4    0.83    0.39
   1 -10   4    0.49    0.41
  -1  10   4    0.82    0.30
   1  10  -4    0.57    0.38
   1  10   4    1.02    0.42
   1  10   4    0.76    0.37
  -1 -10   4    0.58    0.42
   1 -10  -4    0.23    0.43
  -1  10  -4    0.80    0.38
   2  10  -4    6.64    0.61
   2 -10   4    6.69    0.75
  -2  10   4    5.38    0.60
  -2 -10   4    5.81    0.62
   2  10   4    7.03    0.67
  -2  10  -4    5.04    0.60
   2  10   4    6.80    0.64
   2 -10  -4    6.68    0.69
   3 -10   4   12.35    1.07
   3  10  -4   14.62    1.00
  -3  10   4   13.67    0.97
  -3 -10   4   13.22    1.02
   3  10   4   13.27    0.95
  -3  10  -4   13.43    0.99
   3 -10  -4   12.99    1.03
   3  10   4   13.22    1.05
  -4  10   4    4.21    0.60
   4 -10   4    5.74    0.82
   4  10  -4    5.23    0.60
   4  10  -4    5.74    0.64
   4 -10  -4    4.61    0.76
  -4  10  -4    4.25    0.67
   4  10   4    5.97    0.65
   4  10   4    4.52    0.66
  -5  10   4    1.36    0.57
   5  10  -4    1.90    0.54
   5 -10   4    1.87    0.71
   5  10  -4    1.85    0.49
   5 -10  -4    1.40    0.71
   5  10   4    2.14    0.65
  -5  10  -4    1.37    0.56
   6 -10   4    4.73    0.87
   6  10  -4    4.44    0.70
  -6  10   4    3.77    0.76
   6 -10  -4    4.07    0.84
   6  10   4    3.16    0.74
   7  10  -4    0.48    0.72
   7 -10   4    2.30    0.87
   7 -10  -4    0.80    0.90
   7  10   4    2.00    0.82
   0  11  -4    0.14    0.43
   0 -11   4    0.56    0.48
   0  11   4    0.46    0.42
   1 -11   4   12.22    1.01
   1  11  -4   13.89    0.94
  -1  11   4   11.99    0.92
  -1 -11   4   12.42    0.95
  -1  11  -4   11.97    0.95
   1  11   4   12.08    0.93
   1  11   4    9.80    0.92
   1 -11  -4   12.75    0.95
   2 -11   4    0.50    0.55
   2  11  -4    0.70    0.40
  -2  11   4    1.09    0.44
  -2  11  -4    2.41    0.53
  -2 -11   4    1.34    0.51
   2 -11  -4    0.27    0.56
   2  11   4    0.79    0.44
   2  11   4    0.50    0.50
  -3  11   4    0.36    0.43
   3 -11   4   -0.05    0.59
   3  11  -4   -0.19    0.40
   3  11   4    0.11    0.52
   3 -11  -4   -0.04    0.59
   3  11   4    0.27    0.46
  -3  11  -4   -0.26    0.44
   4 -11   4    6.93    0.87
   4  11  -4    7.81    0.78
  -4  11   4    7.01    0.74
   4 -11  -4    4.50    0.82
  -4  11  -4    6.87    0.74
   4  11   4    6.25    0.73
   4  11   4    6.02    0.81
   5 -11   4    5.76    0.90
   5  11  -4    6.50    0.75
  -5  11   4    5.63    0.80
   5  11   4    6.86    0.89
   5  11   4    7.94    0.78
  -5  11  -4    7.16    0.84
   5 -11  -4    5.97    0.95
  -6  11   4    1.20    0.66
   6 -11   4    1.04    0.82
   6  11   4    0.48    0.76
  -6  11  -4    1.05    0.74
   6 -11  -4    0.66    0.89
   0  12   4    5.15    0.63
   0  12  -4    4.28    0.62
   0 -12   4    5.41    0.72
   1  12  -4    2.62    0.54
  -1  12   4    1.69    0.51
   1 -12   4    4.49    0.69
   1  12   4    2.40    0.53
  -1  12  -4    2.76    0.60
  -1 -12   4    2.98    0.66
  -2  12   4    0.65    0.51
   2  12  -4    0.43    0.46
   2 -12   4    0.94    0.64
  -2  12  -4    0.71    0.52
   2 -12  -4    0.22    0.59
   2  12   4    0.00    0.42
  -3  12   4    9.80    0.91
   3 -12   4    9.65    1.07
   3  12  -4   13.80    1.01
   3  12   4   10.48    0.94
   3 -12  -4   11.26    1.07
  -3  12  -4   10.61    0.93
   4 -12   4    1.02    0.80
  -4  12   4    1.22    0.61
   4  12  -4    0.87    0.54
   4  12   4    1.11    0.60
  -4  12  -4    1.03    0.57
   4 -12  -4    0.46    0.78
   4  12   4    0.19    0.68
   5 -12   4    4.45    1.00
  -5  12   4    2.89    0.75
   5  12   4    3.26    0.66
   5  12   4    1.59    0.81
  -5  12  -4    4.35    0.79
   5 -12  -4    2.92    0.87
  -6  12   4    3.98    0.89
   6 -12   4    3.55    1.05
   6  12  -4    4.84    0.85
   6  12   4    4.10    0.76
   6  12   4    5.20    1.12
   6 -12  -4    3.21    1.09
  -6  12  -4    3.17    0.83
   0 -13   4   -0.06    0.61
   0  13  -4   -0.62    0.55
   0  13   4   -0.13    0.48
   1 -13   4    5.23    0.81
  -1  13   4    5.45    0.70
   1  13  -4    3.85    0.70
   1  13   4    5.39    0.70
  -1  13  -4    3.44    0.67
   2  13  -4   17.74    1.31
  -2  13   4   16.18    1.26
   2 -13   4   15.08    1.32
   2  13   4   16.48    1.22
  -2  13  -4   16.20    1.23
   3 -13   4    1.12    0.77
  -3  13   4    0.98    0.59
   3  13  -4    1.45    0.58
   3 -13  -4    0.61    0.79
  -3  13  -4    1.51    0.66
   3  13   4    1.75    0.70
  -4  13   4    8.94    1.01
   4  13  -4    9.42    0.96
   4 -13   4    7.55    1.72
  -4  13  -4    9.69    0.99
   4 -13  -4   11.31    1.22
   4  13   4   10.15    0.98
   5  13  -4    3.09    0.80
  -5  13   4    5.15    0.89
   5 -13   4    2.88    1.00
  -5  13  -4    2.60    0.81
   5  13   4    3.16    0.81
   5 -13  -4    2.89    1.04
   0  14  -4   26.18    1.81
   1 -14   4    1.09    0.77
  -1  14   4    1.66    1.12
   1  14   4    1.69    0.72
   2 -14   4    0.16    0.79
   2  14  -4    0.05    0.60
  -2  14   4    0.01    0.59
  -2  14  -4   -0.53    0.66
   2  14   4    1.19    0.62
  -3  14   4    1.20    0.72
   3  14  -4    1.34    0.72
  -3  14  -4    1.16    0.75
   3  14   4    0.59    0.69
   4  14  -4    3.64    0.87
   4 -14   4    5.00    1.10
  -4  14   4    3.11    0.85
  -4  14  -4    5.70    0.94
   4  14   4    5.56    0.85
   4 -14  -4    5.66    1.22
   0  15   4   -1.07    0.63
   0  15  -4   -0.10    0.66
  -1  15   4    0.74    0.69
   1  15  -4   -0.05    0.68
  -1  15  -4    1.72    0.79
   1  15   4    1.00    0.76
   2  15  -4    1.44    0.82
  -2  15   4    1.33    0.80
   2 -15   4    2.48    1.04
   2  15   4    1.03    0.72
  -2  15  -4    1.20    0.74
   0   0   5    0.00    0.15
   0   0  -5    0.18    0.15
   0   0  -5    0.37    0.18
   0   0   5    0.15    0.16
   0   0   5    0.03    0.05
   1   0  -5    1.62    0.23
  -1   0  -5    1.73    0.20
   1   0  -5    1.45    0.19
   1   0   5    1.64    0.21
  -1   0   5    1.06    0.19
   1   0  -5    1.78    0.13
  -1   0  -5    1.66    0.20
  -1   0   5    1.57    0.22
   1   0   5    1.95    0.20
   2   0  -5  141.56    7.13
   2   0   5  143.21    7.12
  -2   0   5  137.42    7.17
  -2   0  -5  137.27    7.12
   2   0  -5  140.10    7.16
   2   0   5  141.09    7.13
   2   0  -5  138.33    7.14
  -2   0  -5  141.62    7.12
   3   0   5   29.48    1.58
  -3   0   5   28.86    1.67
   3   0  -5   28.73    1.58
   3   0   5   31.03    1.58
  -3   0  -5   28.90    1.57
   4   0  -5   10.11    0.67
   4   0   5    9.93    0.70
   4   0   5   11.29    0.71
  -4   0   5   10.55    0.86
  -5   0   5   21.35    1.55
   5   0  -5   20.94    1.29
   5   0   5   23.39    1.30
   5   0   5   22.93    1.32
  -6   0   5    2.57    0.80
   6   0  -5    1.73    0.39
   6   0   5    1.91    0.45
   6   0   5    1.64    0.38
   7   0   5    0.37    0.49
  -7   0   5    0.77    0.72
   7   0  -5    0.81    0.44
   7   0   5    0.82    0.41
   8   0  -5   10.95    1.00
   8   0   5   11.98    0.99
  -8   0   5   11.21    1.35
   8   0   5   10.58    1.01
   9   0  -5    3.94    0.79
  -9   0   5    3.39    1.29
   9   0   5    5.11    0.84
   0  -1  -5   93.57    5.12
   0  -1   5  101.79    5.10
   0  -1  -5   99.38    5.10
   0   1  -5   99.61    5.11
   0   1  -5   98.99    5.10
   0  -1   5   99.65    5.12
   0   1   5  101.83    5.12
   0   1  -5  102.78    5.07
   0  -1   5  101.13    5.07
   0   1   5  103.58    5.11
   1  -1   5  140.19    7.25
   1  -1   5  148.64    7.29
   1   1  -5  145.64    7.28
  -1   1   5  147.96    7.29
   1   1  -5  147.60    7.32
  -1   1   5  142.94    7.24
   1  -1   5  140.07    7.27
   1  -1  -5  141.41    7.24
   1   1   5  141.76    7.26
   1  -1  -5  141.40    7.27
  -1   1  -5  142.21    7.27
   1  -1  -5  138.56    7.30
   1   1   5  141.15    7.29
  -1   1  -5  144.44    7.28
  -1  -1   5  143.03    7.30
  -1  -1   5  146.70    7.29
   1  -1  -5  143.23    7.29
   2  -1   5   63.36    3.28
   2   1  -5   64.42    3.32
   2   1  -5   61.95    3.31
  -2   1   5   62.28    3.37
  -2  -1  -5   62.85    3.30
   2  -1   5   63.17    3.28
   2  -1   5   65.17    3.30
   2   1   5   65.36    3.27
  -2  -1   5   63.35    3.34
   2   1   5   65.72    3.30
  -2  -1   5   62.90    3.36
   2  -1  -5   66.30    3.32
  -2   1  -5   62.82    3.30
   2  -1  -5   64.19    3.26
  -3   1   5    3.90    0.46
   3  -1   5    5.25    0.42
  -3  -1  -5    4.18    0.34
   3  -1   5    5.03    0.39
   3   1  -5    4.33    0.36
  -3   1  -5    4.53    0.55
   3   1   5    5.07    0.39
   3   1   5    5.37    0.40
   3  -1  -5    4.54    0.36
  -3  -1   5    5.88    0.52
  -3   1  -5    5.32    0.45
   3  -1  -5    5.09    0.40
   4  -1   5   37.20    2.00
  -4   1   5   36.46    2.14
   4   1  -5   37.74    2.01
  -4  -1  -5   36.34    1.98
   4  -1   5   37.97    2.03
  -4  -1   5   39.00    2.15
   4   1   5   37.29    1.99
   4   1   5   37.36    2.02
   4  -1  -5   37.53    2.01
   5   1  -5    0.65    0.29
  -5   1   5    0.13    0.48
   5  -1   5    0.45    0.29
   5  -1   5    1.21    0.36
   5   1   5    0.97    0.33
   5   1   5    0.69    0.31
  -5  -1   5    1.01    0.56
   5  -1  -5    0.60    0.27
   6  -1   5    9.22    0.80
   6   1  -5    9.58    0.72
   6  -1   5   10.26    0.79
   6  -1  -5   10.78    0.85
  -6  -1   5    8.18    1.01
   6   1   5    9.19    0.75
   6   1   5    9.37    0.82
  -7   1   5    9.76    1.23
   7   1  -5   12.20    0.95
   7  -1   5   13.01    1.00
  -7  -1   5   11.07    1.22
   7   1   5   12.79    0.96
   7  -1  -5   12.66    1.01
   7   1   5   13.46    0.97
  -8   1   5    1.80    0.93
   8  -1   5    1.90    0.66
   8  -1   5    1.42    0.56
   8   1  -5    1.20    0.57
   8  -1  -5    1.76    0.61
  -8  -1   5    0.97    0.95
   8   1   5    0.95    0.52
   9   1  -5    2.97    0.77
   9   1  -5    2.47    0.67
   9  -1   5    1.42    0.99
   9  -1   5    2.88    0.75
   9  -1  -5    2.57    0.76
   0   2  -5  106.67    5.52
   0   2  -5  109.01    5.56
   0  -2  -5  108.44    5.52
   0   2  -5  109.41    5.51
   0  -2  -5  109.34    5.53
   0  -2  -5  106.27    5.56
   0  -2   5  108.99    5.56
   0   2   5  111.17    5.56
   0   2   5  108.65    5.51
   0  -2   5  110.43    5.52
   1  -2   5    2.66    0.28
   1  -2   5    2.68    0.21
   1   2  -5    3.12    0.25
   1   2  -5    2.56    0.27
  -1  -2  -5    1.95    0.25
  -1   2   5    3.05    0.26
   1  -2   5    2.13    0.21
  -1  -2  -5    2.40    0.19
  -1   2   5    2.22    0.19
   1  -2  -5    2.33    0.18
  -1  -2   5    1.61    0.23
   1   2   5    2.52    0.27
  -1   2  -5    2.74    0.30
  -1   2  -5    2.22    0.20
   1  -2  -5    2.51    0.29
  -1  -2   5    2.47    0.27
   1  -2  -5    2.72    0.26
   1  -2  -5    3.14    0.23
  -1   2  -5    2.12    0.20
   1   2   5    2.77    0.20
  -2  -2  -5   36.18    1.83
   2  -2   5   35.48    1.86
  -2   2   5   34.99    1.85
   2  -2   5   34.75    1.85
   2   2  -5   33.89    1.90
   2   2  -5   34.65    1.90
  -2   2   5   36.39    1.92
   2   2   5   36.27    1.83
   2  -2  -5   35.46    1.84
  -2   2  -5   35.33    1.90
  -2  -2   5   34.27    1.93
   2   2   5   39.00    1.90
  -2   2  -5   35.60    1.85
   2  -2  -5   35.81    1.87
  -2  -2   5   35.17    1.93
   2  -2  -5   35.26    1.88
  -3   2   5    1.20    0.33
   3   2  -5    0.98    0.21
   3  -2   5    1.27    0.37
   3  -2   5    0.97    0.27
   3  -2   5    1.00    0.19
  -3  -2  -5    1.04    0.16
   3   2   5    1.16    0.18
   3  -2  -5    1.26    0.23
   3   2   5    0.92    0.22
  -3  -2   5    1.51    0.38
   3  -2  -5    0.97    0.20
  -4   2   5    2.65    0.47
   4   2  -5    3.03    0.33
   4  -2   5    3.02    0.31
   4  -2   5    3.15    0.42
  -4  -2   5    3.12    0.53
   4  -2  -5    1.96    0.32
   4   2   5    2.89    0.35
   4   2   5    2.16    0.29
  -5   2   5   19.15    1.35
   5   2  -5   19.75    1.14
   5  -2   5   20.39    1.23
   5  -2   5   19.71    1.15
   5  -2  -5   17.10    1.14
   5   2   5   19.82    1.17
   5   2   5   19.30    1.13
  -5  -2   5   17.40    1.37
   6  -2   5    5.97    0.58
   6  -2   5    6.45    0.67
   6   2  -5    6.23    0.57
   6   2   5    5.98    0.57
   6   2   5    5.31    0.57
  -6  -2   5    4.48    0.81
   6  -2  -5    5.98    0.61
   7   2  -5    1.00    0.38
   7  -2   5    1.29    0.55
  -7   2   5    0.86    0.81
   7  -2   5    0.64    0.43
   7   2   5    1.19    0.48
  -7  -2   5    1.82    0.77
   7  -2  -5    1.12    0.48
   8   2  -5    4.76    0.69
   8  -2   5    5.29    0.84
   8  -2   5    6.66    0.76
  -8   2   5    4.91    1.16
  -8  -2   5    4.33    1.06
   8  -2  -5    6.76    0.82
   8   2   5    5.93    0.73
   9  -2   5   -0.06    0.68
   9   2  -5   -0.14    0.65
   9   2  -5   -0.31    0.64
   9  -2   5   -0.39    0.80
   9   2   5   -0.25    0.61
   0   3  -5   40.99    2.07
   0   3   5   42.58    2.13
   0   3   5   39.65    2.07
   0  -3   5   41.38    2.12
   0  -3  -5   37.53    2.12
   0   3  -5   40.93    2.07
   0  -3   5   41.21    2.08
   0  -3   5   40.19    2.07
   0   3  -5   39.74    2.12
   0  -3  -5   38.46    2.06
  -1   3   5  107.36    5.38
   1   3  -5  105.39    5.39
   1   3  -5  106.70    5.36
  -1  -3  -5  105.06    5.34
  -1   3   5  101.96    5.36
   1  -3   5  108.01    5.35
  -1  -3  -5  110.35    5.40
   1   3  -5  104.67    5.41
  -1   3   5  106.95    5.39
  -1   3  -5  106.16    5.37
  -1  -3   5  104.93    5.41
  -1   3  -5  102.98    5.41
   1  -3  -5  102.72    5.36
   1   3   5  117.90    5.42
   1  -3  -5  102.95    5.38
  -1  -3   5  105.67    5.40
   1  -3  -5  100.88    5.40
  -1   3  -5  101.12    5.35
   2  -3   5   21.08    1.18
   2   3  -5   19.14    1.18
  -2   3   5   21.72    1.16
   2  -3   5   19.64    1.09
  -2  -3  -5   19.81    1.04
   2  -3   5   19.27    1.12
  -2   3   5   19.69    1.10
   2  -3  -5   20.95    1.10
  -2   3  -5   20.34    1.14
  -2  -3   5   20.39    1.25
  -2  -3   5   21.37    1.17
  -2   3  -5   20.48    1.08
   2   3   5   21.00    1.15
   2   3   5   21.18    1.05
   2  -3  -5   20.88    1.12
   3  -3   5    4.01    0.32
  -3  -3  -5    4.30    0.27
   3  -3   5    4.19    0.43
  -3   3   5    3.68    0.34
   3  -3   5    4.50    0.47
  -3   3   5    3.12    0.41
   3  -3  -5    4.07    0.36
   3   3   5    3.66    0.28
  -3  -3   5    3.67    0.49
   3   3   5    4.19    0.38
  -3  -3   5    3.97    0.41
   4  -3   5   27.92    1.52
  -4  -3  -5   26.05    1.36
   4   3  -5   26.43    1.42
   4  -3   5   24.81    1.40
  -4   3   5   26.98    1.60
   4  -3  -5   24.90    1.44
   4   3   5   24.32    1.45
  -4  -3   5   26.60    1.61
   4   3   5   24.83    1.37
  -5   3   5    1.07    0.52
   5   3  -5    1.43    0.30
   5  -3   5    2.17    0.47
   5  -3   5    1.28    0.31
   5  -3  -5    1.65    0.38
   5   3   5    0.80    0.35
   5   3   5    1.62    0.30
  -5  -3   5    2.09    0.61
   6  -3   5    0.65    0.36
   6  -3   5    1.06    0.51
   6   3  -5    0.90    0.35
  -6  -3   5    1.00    0.65
   6   3   5    0.85    0.41
   6  -3  -5    0.57    0.37
   6   3   5    0.84    0.58
   7  -3   5    5.94    0.78
   7   3  -5    6.08    0.62
  -7   3   5    5.30    0.99
   7  -3   5    5.25    0.61
   7   3   5    5.94    0.70
  -7  -3   5    5.30    0.95
   7  -3  -5    5.29    0.71
   8  -3   5    1.17    0.72
   8   3  -5    1.67    0.58
   8   3  -5    1.29    0.55
  -8   3   5    0.89    0.99
   8  -3   5    1.42    0.55
   8   3   5    1.50    0.56
   8  -3  -5    1.33    0.59
   9  -3   5   -0.83    0.78
   9   3  -5    1.24    0.70
   9   3  -5    0.42    0.69
   9  -3   5    0.77    0.68
   9  -3  -5    0.83    0.79
   9   3   5    0.75    0.72
   0  -4   5    4.55    0.33
   0   4  -5    4.65    0.29
   0   4   5    4.76    0.44
   0   4  -5    4.79    0.34
   0  -4  -5    4.50    0.31
   0  -4  -5    4.17    0.40
   0   4   5    4.68    0.33
   0  -4   5    4.20    0.38
   0   4   5    4.33    0.31
   0  -4   5    4.57    0.33
  -1  -4  -5   30.39    1.54
  -1   4   5   29.28    1.63
   1   4  -5   31.08    1.58
   1  -4   5   27.68    1.58
   1  -4   5   28.21    1.63
  -1   4   5   29.97    1.58
  -1   4   5   29.70    1.59
   1   4  -5   29.46    1.59
   1  -4  -5   30.90    1.59
  -1  -4   5   30.86    1.62
  -1   4  -5   28.87    1.53
   1  -4  -5   30.72    1.64
  -1  -4   5   30.08    1.63
   1   4   5   32.04    1.64
   1  -4  -5   30.96    1.58
  -1   4  -5   30.67    1.59
   2   4  -5  121.11    6.35
   2  -4   5  122.40    6.28
  -2   4   5  124.43    6.31
   2  -4   5  122.94    6.30
   2  -4   5  121.66    6.36
  -2   4   5  126.58    6.35
  -2  -4   5  120.79    6.35
   2  -4  -5  128.09    6.33
   2   4   5  124.48    6.35
  -2   4  -5  125.64    6.32
   3  -4   5   59.15    3.07
  -3   4   5   61.22    3.18
   3  -4   5   59.96    3.17
  -3   4   5   58.49    3.10
   3  -4   5   56.63    3.12
  -3  -4   5   58.98    3.21
   3   4   5   60.25    3.15
  -3  -4   5   60.10    3.16
  -3   4  -5   62.84    3.13
   3  -4  -5   59.68    3.13
   4   4  -5    3.30    0.36
   4  -4   5    3.64    0.34
  -4   4   5    3.96    0.57
   4  -4   5    3.84    0.52
  -4  -4   5    3.73    0.64
   4   4   5    3.29    0.27
   4  -4  -5    3.52    0.41
   4   4   5    3.48    0.43
   5  -4   5   20.79    1.17
   5   4  -5   19.30    1.18
   5  -4   5   19.91    1.33
  -5   4   5   20.48    1.43
  -5  -4   5   20.52    1.46
   5  -4  -5   18.45    1.24
   5   4   5   19.87    1.23
   6  -4   5    1.18    0.54
   6   4  -5    0.37    0.32
   6  -4   5    0.51    0.36
   6   4   5    0.38    0.37
   6  -4  -5   -0.24    0.42
  -6  -4   5    0.91    0.67
   7  -4   5    1.81    0.57
   7   4  -5    2.89    0.49
   7  -4   5    3.12    0.70
  -7   4   5    1.40    0.87
   7   4   5    2.13    0.51
   7  -4  -5    1.06    0.54
  -7  -4   5    2.57    0.95
   8   4  -5    3.42    0.70
   8   4  -5    3.14    0.62
   8  -4   5    2.43    0.78
   8  -4   5    2.68    0.64
  -8   4   5    2.79    1.10
   8  -4  -5    2.70    0.75
   8   4   5    2.77    0.63
   9   4  -5    3.06    0.81
   9  -4  -5    1.35    0.86
   9   4   5    1.73    0.77
   0  -5   5   38.62    2.02
   0   5   5   41.66    2.09
   0   5   5   38.41    2.02
   0   5  -5   39.31    2.00
   0  -5  -5   39.34    2.03
   0  -5   5   37.78    2.09
   0   5  -5   39.25    2.05
   0   5   5   38.45    2.05
  -1  -5  -5  113.61    5.75
   1   5  -5  111.81    5.79
   1  -5   5  119.55    5.85
  -1   5   5  115.42    5.81
  -1   5   5  113.57    5.80
  -1  -5  -5  118.27    5.75
   1   5  -5  114.10    5.79
  -1   5   5  113.24    5.79
   1  -5  -5  106.75    5.82
   1   5   5  111.08    5.83
  -1  -5   5  114.40    5.83
  -1  -5   5  115.37    5.82
  -1   5  -5  111.53    5.80
   1   5   5  110.72    5.80
   2   5  -5    3.06    0.43
   2  -5   5    3.23    0.25
  -2   5   5    2.52    0.30
   2  -5   5    3.05    0.28
  -2   5   5    3.73    0.37
   2  -5   5    3.71    0.42
   2   5   5    3.77    0.38
  -2  -5   5    2.78    0.42
  -2   5  -5    2.91    0.33
   2  -5  -5    3.47    0.35
  -2  -5   5    3.11    0.37
   3  -5   5    1.95    0.21
  -3   5   5    2.54    0.39
  -3   5   5    1.71    0.30
   3  -5   5    2.38    0.33
   3  -5   5    1.42    0.39
  -3  -5   5    1.82    0.45
   3  -5  -5    1.31    0.32
  -3  -5   5    1.87    0.36
   3   5   5    2.20    0.36
  -3   5  -5    1.15    0.31
  -4   5   5   18.05    1.17
  -4   5   5   20.77    1.32
   4   5  -5   20.45    1.16
   4  -5   5   18.75    1.27
   4   5   5   19.92    1.23
   4  -5  -5   20.98    1.22
  -4  -5   5   20.42    1.44
  -4   5  -5   21.17    1.22
   5  -5   5    7.87    0.61
   5   5  -5    7.30    0.60
  -5   5   5    7.62    0.83
   5  -5   5    8.79    0.89
  -5  -5   5    6.62    0.88
   6  -5   5    5.43    0.54
   6   5  -5    4.39    0.51
   6  -5   5    4.49    0.66
   6   5   5    5.42    0.64
  -6  -5   5    4.00    0.83
   6  -5  -5    4.81    0.61
   7   5  -5    8.16    0.83
   7   5  -5    8.29    0.74
  -7   5   5    7.72    1.11
   7  -5   5    8.63    0.83
   7  -5   5    8.22    0.93
   7   5   5    8.74    0.83
   7  -5  -5    7.11    0.82
  -8   5   5   -0.20    0.97
   8  -5   5   -0.22    0.68
   8   5  -5    0.17    0.60
   8   5   5   -0.29    0.61
   8  -5  -5   -0.32    0.61
   9  -5   5    0.71    0.95
   9   5  -5    1.89    0.71
   9  -5  -5    1.29    0.89
   9   5   5    0.32    0.78
   0   6  -5   76.68    4.01
   0   6   5   76.80    4.08
   0  -6  -5   79.06    4.06
   0   6  -5   80.44    4.08
   0   6  -5   79.05    4.01
   0   6   5   81.23    4.11
   0  -6   5   82.20    4.13
  -1   6   5   37.44    1.99
  -1  -6  -5   37.85    1.92
   1  -6   5   36.63    2.04
   1   6  -5   36.94    1.97
  -1   6   5   39.56    1.99
   1   6  -5   35.96    1.97
   1  -6  -5   38.80    1.99
   1   6   5   37.11    2.03
  -1   6  -5   37.10    1.98
  -1  -6   5   37.20    2.00
   1   6   5   35.91    1.91
   1   6   5   37.99    1.99
  -1  -6   5   36.27    2.01
   2   6  -5    9.02    0.60
  -2   6   5    9.45    0.65
   2  -6   5    8.76    0.74
  -2   6   5    8.57    0.65
  -2  -6   5    8.02    0.67
  -2  -6   5    9.15    0.74
  -2   6  -5   10.10    0.65
   2   6   5   10.30    0.70
   2  -6  -5   10.00    0.67
  -3   6   5    0.39    0.34
  -3   6   5    0.21    0.26
   3  -6   5    0.14    0.16
   3  -6   5    0.69    0.41
   3  -6  -5   -0.22    0.30
  -3   6  -5    0.27    0.29
  -3  -6   5    0.43    0.44
   3   6   5    0.22    0.29
  -3  -6   5    0.11    0.32
  -4   6   5    4.22    0.44
   4  -6   5    3.89    0.33
  -4   6   5    4.54    0.60
   4  -6   5    2.47    0.51
  -4   6  -5    3.06    0.47
  -4  -6   5    2.58    0.60
   4   6   5    3.63    0.47
   4  -6  -5    3.10    0.46
  -4  -6   5    2.70    0.48
  -5   6   5    3.47    0.65
   5  -6   5    4.49    0.61
   5   6  -5    3.76    0.43
   5  -6   5    4.02    0.41
   5   6  -5    3.12    0.45
   5  -6  -5    3.46    0.55
   5   6   5    3.31    0.53
   6   6  -5    7.18    0.72
  -6   6   5    7.50    1.07
   6   6  -5    6.40    0.62
   6  -6   5    6.39    0.82
   6   6   5    6.47    0.69
   6  -6  -5    6.76    0.76
   7  -6   5   -0.29    0.64
  -7   6   5    1.38    0.92
   7   6  -5    1.20    0.50
   7  -6  -5    0.33    0.62
   7   6   5    0.71    0.52
   8  -6   5    1.09    0.84
  -8   6   5    1.05    1.07
   8   6  -5    2.08    0.69
   0   7   5    2.35    0.37
   0   7   5    2.56    0.34
   0  -7  -5    2.89    0.33
   0  -7   5    3.33    0.45
   0   7   5    3.01    0.31
   0   7  -5    3.85    0.39
  -1   7   5    0.14    0.24
  -1   7   5    0.10    0.23
   1   7  -5    0.27    0.24
   1   7  -5    0.19    0.29
   1   7  -5    0.22    0.15
  -1  -7  -5    0.15    0.18
   1  -7   5   -0.04    0.33
  -1  -7   5    0.09    0.30
   1   7   5   -0.03    0.26
   1  -7  -5   -0.26    0.26
   1   7   5    0.12    0.25
  -1   7  -5    0.49    0.30
   1   7   5    0.80    0.32
   2   7  -5   25.47    1.47
  -2   7   5   26.41    1.48
   2  -7   5   26.22    1.56
   2   7  -5   25.13    1.44
  -2   7   5   25.28    1.48
  -2   7  -5   27.53    1.49
   2   7   5   27.55    1.52
   2  -7  -5   27.37    1.51
  -2  -7   5   26.89    1.53
  -3   7   5    1.39    0.32
   3   7  -5    1.33    0.31
  -3   7   5    1.43    0.40
   3  -7   5    2.00    0.47
  -3  -7   5    1.12    0.39
   3   7   5    2.05    0.42
  -3   7  -5    1.66    0.37
   3  -7  -5    1.55    0.42
   4   7  -5   14.56    0.95
  -4   7   5   14.61    1.13
   4  -7   5   14.17    1.12
  -4   7   5   14.62    0.98
   4   7   5   13.31    1.02
   4  -7  -5   14.65    1.01
  -4  -7   5   14.64    1.05
   5   7  -5    7.22    0.60
  -5   7   5    7.10    0.86
  -5   7   5    7.59    0.69
   5  -7   5    6.87    0.80
   5  -7  -5    6.14    0.70
   5   7   5    6.06    0.67
  -6   7   5    0.45    0.74
   6  -7   5    0.81    0.65
   6   7  -5    0.53    0.39
   6   7  -5    0.37    0.47
   6  -7  -5    0.52    0.57
   6   7   5    0.26    0.52
  -7   7   5   -0.44    0.93
   7  -7   5    0.02    0.67
   7   7  -5    0.49    0.55
   7  -7  -5    0.74    0.67
   7   7   5    0.48    0.59
   8  -7   5    2.79    0.97
   8   7  -5    3.51    0.86
   8  -7  -5    3.38    0.94
   8   7   5    3.31    0.81
   0  -8  -5    8.01    0.60
   0   8   5    6.71    0.60
   0   8  -5    8.34    0.62
   0  -8   5    6.91    0.67
   0   8   5    7.70    0.59
   1  -8   5    1.45    0.45
  -1   8   5    1.90    0.35
  -1  -8  -5    1.17    0.24
   1   8  -5    0.71    0.19
   1   8  -5    1.12    0.30
  -1   8   5    0.84    0.29
  -1   8  -5    0.85    0.34
   1   8   5    1.46    0.31
  -1  -8   5    1.28    0.38
   1   8   5    1.36    0.40
   1  -8  -5    1.17    0.36
  -2   8   5    9.47    0.70
   2   8  -5    9.44    0.63
  -2   8   5    9.60    0.72
   2  -8   5   11.21    0.85
   2   8  -5   10.05    0.68
   2   8   5    7.45    0.65
  -2  -8   5   10.05    0.74
  -2   8  -5    9.49    0.72
   2   8   5    8.17    0.74
   2  -8  -5    8.30    0.72
   3   8  -5    3.94    0.48
  -3   8   5    4.23    0.55
  -3   8   5    5.39    0.53
   3   8  -5    5.34    0.47
   3   8   5    3.89    0.56
  -3  -8   5    5.35    0.56
  -3   8  -5    5.16    0.53
   3  -8  -5    4.25    0.57
   4   8  -5    9.50    0.75
  -4   8   5   10.68    0.88
   4  -8   5    9.27    0.89
  -4   8   5    8.55    0.73
  -4   8  -5    8.26    0.76
  -4  -8   5    9.43    0.82
   4  -8  -5    9.81    0.85
   4   8   5    9.22    0.86
   5  -8   5    2.79    0.67
  -5   8   5    2.47    0.54
   5   8  -5    2.83    0.50
  -5   8   5    3.03    0.73
   5   8  -5    2.98    0.44
   5  -8  -5    3.14    0.64
   5   8   5    2.34    0.52
  -5   8  -5    2.93    0.56
   6  -8   5    0.62    0.62
  -6   8   5    1.69    1.08
   6   8  -5    0.94    0.51
   6  -8  -5    0.12    0.61
   6   8   5    0.22    0.53
   7  -8   5    2.99    0.81
   7   8  -5    2.03    0.63
   7   8   5    1.15    0.68
   7  -8  -5    2.52    0.76
   8   8  -5    1.76    0.73
   8  -8   5    0.53    0.96
   8   8   5    2.06    0.85
   8  -8  -5    2.05    0.95
   0   9  -5    8.12    0.64
   0  -9   5    6.59    0.68
   0  -9  -5    7.01    0.58
   0   9   5    6.83    0.60
   0   9   5    6.79    0.59
  -1   9   5    8.87    0.70
  -1   9   5    9.05    0.73
   1   9  -5   10.43    0.74
   1  -9   5   10.27    0.85
  -1  -9   5    9.62    0.78
   1  -9  -5   10.68    0.82
  -1   9  -5   10.07    0.76
   1   9   5   10.42    0.80
   1   9   5    9.94    0.76
   2   9  -5    3.63    0.37
  -2   9   5    3.99    0.46
   2  -9   5    2.32    0.66
   2   9  -5    3.25    0.45
  -2   9   5    4.50    0.50
   2  -9  -5    2.72    0.51
  -2  -9   5    3.72    0.51
   2   9   5    3.00    0.45
   2   9   5    3.07    0.52
  -3   9   5    0.98    0.37
   3   9  -5    1.36    0.34
  -3   9   5    0.96    0.43
   3  -9   5    1.37    0.51
   3   9  -5    0.99    0.36
  -3   9  -5    1.10    0.40
   3   9   5    1.10    0.35
   3   9   5    0.41    0.44
  -3  -9   5    0.92    0.44
   3  -9  -5    1.22    0.48
   4   9  -5    0.40    0.38
   4  -9   5    0.79    0.57
  -4   9   5    1.05    0.65
  -4   9   5    0.41    0.42
   4   9  -5    0.81    0.37
   4   9   5    0.64    0.49
   4  -9  -5    0.90    0.55
  -4   9  -5    0.59    0.43
  -4  -9   5    0.86    0.50
  -5   9   5    2.07    0.56
   5  -9   5    1.91    0.62
   5   9  -5    2.09    0.52
  -5   9  -5    1.06    0.51
   5   9   5    1.89    0.54
   5  -9  -5    2.60    0.66
  -6   9   5    1.44    0.55
   6   9  -5    0.61    0.55
   6  -9   5    1.49    0.74
   6   9   5    0.95    0.63
   6  -9  -5    1.20    0.73
   7  -9   5    2.12    0.82
   7   9  -5    1.95    0.71
   7  -9  -5    3.03    0.90
   0 -10  -5    3.20    0.47
   0 -10   5    2.30    0.51
   0  10   5    3.16    0.48
   0  10   5    2.61    0.42
   0  10  -5    2.59    0.45
   1  10  -5    9.38    0.81
  -1  10   5    9.71    0.75
  -1  10   5   10.01    0.82
   1 -10  -5    9.61    0.81
  -1  10  -5   11.26    0.84
  -1 -10   5   11.22    0.86
   1  10   5   11.97    0.88
   1  10   5   11.49    0.84
  -2  10   5    1.04    0.40
   2  10  -5    0.37    0.35
   2 -10   5    2.33    0.59
   2 -10  -5    1.42    0.50
  -2  10  -5    1.73    0.46
   2  10   5    0.73    0.46
  -2 -10   5    1.01    0.48
   2  10   5    1.27    0.42
   3 -10   5    4.29    0.75
  -3  10   5    4.60    0.58
   3  10  -5    5.24    0.61
   3 -10  -5    6.60    0.73
  -3  10  -5    5.37    0.62
  -3 -10   5    6.05    0.67
   3  10   5    4.78    0.59
   4  10  -5    0.45    0.47
   4  10  -5    1.27    0.44
  -4  10   5    0.70    0.48
   4 -10   5    1.05    0.61
   4  10   5    0.59    0.54
  -4  10  -5    1.36    0.55
   4  10   5    1.74    0.48
   4 -10  -5    1.32    0.63
   5 -10   5    2.06    0.71
   5  10  -5    0.78    0.53
  -5  10   5    2.15    0.58
   5  10  -5    2.62    0.56
   5 -10  -5    1.49    0.64
  -5  10  -5    1.61    0.56
   5  10   5    1.28    0.63
  -6  10   5    1.01    0.60
   6 -10   5   -0.77    0.82
   6  10  -5    0.08    0.60
   6 -10  -5   -0.29    0.73
   6  10   5    0.08    0.69
   7 -10   5   -0.34    0.92
   7  10  -5    0.67    0.73
   7  10   5    0.31    0.72
   7 -10  -5   -0.51    0.91
   0  11   5   -0.12    0.41
   0  11  -5    0.33    0.40
   0 -11   5   -0.02    0.49
  -1  11   5   -0.21    0.38
   1 -11   5    0.29    0.50
   1  11  -5    0.45    0.40
   1 -11  -5    0.24    0.48
   1  11   5   -0.29    0.42
  -1 -11   5    0.29    0.47
   1  11   5    0.30    0.38
  -1  11  -5    0.46    0.42
   2 -11   5    1.08    0.59
  -2  11   5    1.95    0.47
   2  11  -5    1.59    0.45
  -2 -11   5    1.71    0.54
   2 -11  -5    1.26    0.58
  -2  11  -5    0.36    0.44
   2  11   5    1.52    0.47
   2  11   5    0.79    0.53
   3  11  -5    3.02    0.58
  -3  11   5    4.39    0.60
   3 -11   5    4.04    0.75
   3 -11  -5    4.92    0.76
  -3  11  -5    4.12    0.61
   3  11   5    4.77    0.64
   3  11   5    3.48    0.66
   4 -11   5    0.55    0.64
   4  11  -5    1.54    0.50
  -4  11   5    0.71    0.48
   4 -11  -5    1.97    0.74
  -4  11  -5    1.13    0.53
   4  11   5    0.15    0.62
   4  11   5    1.28    0.53
   5 -11   5    0.72    0.80
  -5  11   5    2.07    0.66
   5  11  -5    2.90    0.64
   5  11   5    3.61    0.61
  -5  11  -5    1.56    0.64
   5 -11  -5    1.95    0.82
   5  11   5    1.27    0.73
   6 -11   5    0.31    0.91
  -6  11   5    0.12    0.70
   6  11   5   -1.03    0.72
  -6  11  -5    0.36    0.65
   6 -11  -5   -0.85    0.87
   0  12   5    1.69    0.50
   0  12  -5    1.45    0.56
   0 -12   5    1.82    0.61
   1 -12   5    1.21    0.63
  -1  12   5    1.69    0.51
   1  12  -5    2.58    0.57
   1  12   5    1.70    0.54
  -1  12  -5    0.79    0.49
  -1 -12   5    2.15    0.61
   2 -12   5    2.05    0.67
  -2  12   5    2.34    0.58
   2  12  -5    1.78    0.58
   2 -12  -5    3.04    0.70
   2  12   5    2.81    0.54
  -2  12  -5    2.75    0.62
  -3  12   5    0.50    0.55
   3 -12   5    0.54    0.68
   3  12  -5    0.64    0.50
   3  12   5    0.59    0.69
  -3  12  -5    0.69    0.53
   3  12   5    0.41    0.52
   3 -12  -5   -0.06    0.70
   4 -12   5    1.60    0.75
   4  12  -5    1.29    0.60
  -4  12   5    2.31    0.64
  -4  12  -5    2.16    0.63
   4  12   5    0.71    0.71
   4  12   5    0.91    0.60
   4 -12  -5    0.23    0.80
   5 -12   5    0.14    0.84
  -5  12   5   -0.63    0.65
   5  12   5   -0.43    0.76
  -5  12  -5    1.07    0.75
   5  12   5    1.06    0.59
   5 -12  -5   -0.09    0.88
  -6  12   5    2.42    0.84
   6  12  -5    2.50    0.78
   6  12   5    1.35    0.89
   6  12   5    2.79    0.72
  -6  12  -5    4.06    0.91
   0 -13   5    1.90    0.65
   0  13   5    0.56    0.51
   0  13  -5    0.84    0.56
  -1  13   5    0.66    0.53
   1 -13   5    2.17    0.71
   1  13  -5    2.56    0.60
  -1  13  -5    1.43    0.58
   1  13   5    1.42    0.55
   2  13  -5    1.11    0.57
   2 -13   5    2.59    0.77
  -2  13   5    2.16    0.64
   2  13   5    0.51    0.54
  -2  13  -5    1.96    0.60
  -3  13   5    0.02    0.61
   3 -13   5    0.59    0.82
   3  13  -5   -0.36    0.60
  -3  13  -5   -0.45    0.69
   3 -13  -5    1.19    0.83
  -4  13   5    2.64    0.70
   4  13  -5    3.47    0.70
   4 -13   5    2.65    0.90
   4 -13  -5    2.58    0.97
  -4  13  -5    2.89    0.73
   4  13   5    2.80    0.68
   5  13  -5    1.02    0.77
   5 -13   5    2.63    0.95
  -5  13   5    2.48    0.74
   5  13   5    2.25    0.78
  -5  13  -5    2.53    0.87
   5 -13  -5    0.80    1.04
   0  14  -5   -0.75    1.02
   0  14   5   -1.50    1.00
   1 -14   5    3.45    0.84
  -1  14   5    1.47    0.75
   1  14   5    2.59    0.66
  -2  14   5    3.25    0.71
   2 -14   5    2.33    0.84
   2  14  -5    1.86    0.74
   2  14   5    2.52    0.68
  -2  14  -5    2.91    0.79
  -3  14   5    5.33    0.85
   3 -14   5    6.03    1.04
   3  14  -5    3.89    0.84
   3  14   5    4.15    0.82
  -3  14  -5    4.30    0.87
   0  15   5    0.07    0.66
   0  15  -5   -0.11    0.67
  -1  15   5    1.01    0.70
   1  15  -5    0.12    0.70
  -1  15  -5    1.38    0.79
   1  15   5    0.99    0.77
   0   0  -6  552.26   27.88
   1   0  -6   72.74    3.71
  -1   0  -6   71.15    3.71
   1   0   6   73.88    3.72
  -1   0  -6   68.61    3.70
   1   0  -6   69.82    3.72
   1   0   6   73.71    3.71
  -1   0   6   74.13    3.72
  -1   0   6   75.08    3.73
   1   0  -6   71.40    3.65
   2   0   6    6.24    0.44
   2   0  -6    6.29    0.38
   2   0   6    6.70    0.47
   2   0  -6    6.59    0.43
  -2   0   6    5.75    0.49
  -2   0  -6    6.17    0.44
  -3   0   6    3.77    0.45
  -3   0  -6    3.38    0.35
   3   0   6    3.69    0.36
   3   0  -6    3.48    0.34
   3   0   6    4.66    0.38
   4   0   6   46.48    2.51
   4   0  -6   48.36    2.51
   4   0   6   47.51    2.52
  -4   0   6   47.24    2.66
   5   0  -6    0.16    0.25
   5   0   6    0.35    0.34
   5   0   6    0.38    0.31
  -5   0   6    0.46    0.54
  -6   0   6   26.23    1.80
   6   0   6   27.45    1.58
   6   0   6   25.46    1.57
   7   0   6    0.32    0.44
   7   0   6    0.27    0.49
   7   0  -6   -0.27    0.39
  -7   0   6   -0.63    0.69
  -8   0   6   -0.56    0.96
   8   0  -6    0.24    0.55
   8   0   6   -0.82    0.57
   8   0   6    0.04    0.53
  -9   0   6   -0.25    1.07
   9   0   6    0.17    0.76
   9   0  -6   -0.10    0.70
   0   1  -6    2.20    0.15
   0   1  -6    1.74    0.23
   0  -1   6    2.16    0.24
   0   1  -6    1.29    0.22
   0   1   6    2.76    0.27
   0  -1   6    2.01    0.14
   0  -1  -6    2.49    0.24
   0  -1   6    1.87    0.21
   0  -1  -6    1.80    0.26
   0   1   6    2.16    0.23
  -1   1   6   10.07    0.63
   1   1  -6   10.90    0.64
   1  -1   6   11.62    0.66
  -1   1   6   12.25    0.67
   1  -1   6    8.66    0.58
  -1   1   6   11.86    0.56
  -1  -1  -6   11.53    0.65
  -1  -1  -6   10.89    0.61
   1  -1   6   10.97    0.64
   1   1  -6    9.67    0.67
   1  -1  -6   11.61    0.68
   1   1   6    9.76    0.61
  -1   1  -6   10.72    0.66
   1  -1  -6   10.34    0.64
  -1  -1   6   10.22    0.65
  -1  -1   6   10.72    0.64
   1  -1  -6   10.45    0.56
  -1   1  -6   10.26    0.62
   1   1   6   10.74    0.66
   2  -1   6   87.04    4.54
   2  -1   6   91.54    4.56
   2  -1   6   92.35    4.56
  -2   1   6   93.54    4.60
  -2  -1  -6   74.25    4.53
  -2   1  -6   91.73    4.57
   2   1   6   86.74    4.57
   2  -1  -6   90.61    4.51
  -2  -1   6   90.71    4.61
   2   1   6   91.94    4.54
   2  -1  -6   90.62    4.56
  -2  -1   6   88.68    4.59
  -2   1  -6   87.18    4.54
   3  -1   6   14.04    0.86
  -3   1   6   14.12    0.95
   3  -1   6   13.51    0.89
   3   1  -6   14.06    0.85
   3  -1  -6   15.18    0.83
   3   1   6   15.52    0.88
   3   1   6   14.77    0.85
  -3  -1   6   14.14    0.97
   3  -1  -6   16.18    0.87
  -4  -1  -6   41.75    2.30
  -4   1   6   43.15    2.45
   4  -1   6   43.99    2.33
   4   1  -6   43.57    2.33
   4  -1   6   43.51    2.35
   4   1   6   45.53    2.36
  -4  -1   6   44.93    2.47
   4  -1  -6   44.00    2.34
  -5   1   6    3.13    0.63
   5   1  -6    3.79    0.41
   5  -1   6    5.04    0.49
   5  -1   6    4.22    0.50
   5  -1  -6    4.06    0.45
   5   1   6    4.90    0.48
   5   1   6    4.30    0.49
  -5  -1   6    5.19    0.76
   6  -1   6   19.73    1.16
   6   1  -6   17.95    1.15
  -6   1   6   17.74    1.42
   6  -1   6   18.84    1.24
   6  -1  -6   16.42    1.17
  -6  -1   6   17.09    1.42
   6   1   6   18.62    1.18
   6   1   6   17.76    1.24
  -7   1   6    7.77    1.13
   7  -1   6    8.13    0.78
   7   1  -6    7.84    0.75
   7   1   6    8.70    0.78
   7  -1  -6    8.88    0.81
  -7  -1   6    9.15    1.15
   7   1   6    8.61    0.78
   8   1  -6    4.92    0.69
   8  -1   6    5.13    0.70
  -8   1   6    5.70    1.18
   8  -1   6    5.22    0.80
   8   1   6    5.71    0.75
   8  -1  -6    5.15    0.74
  -8  -1   6    4.59    1.08
   9  -1   6    2.76    0.72
  -9   1   6    1.82    1.25
   9   1  -6    2.45    0.72
   9  -1  -6    2.74    0.88
  -9  -1   6    2.33    1.15
   9   1   6    1.83    1.09
   0   2   6    0.96    0.11
   0  -2   6    0.91    0.11
   0   2  -6    0.89    0.22
   0  -2   6    1.05    0.21
   0   2   6    1.24    0.22
   0  -2  -6    0.51    0.23
   0   2  -6    0.89    0.18
   0   2   6    0.97    0.18
   0  -2  -6    1.37    0.19
   0  -2   6    0.95    0.15
   0   2  -6    1.06    0.12
  -1   2   6    0.54    0.10
   1   2  -6    0.45    0.20
   1   2  -6    0.42    0.20
   1  -2   6    0.31    0.12
  -1   2   6    0.31    0.18
  -1  -2  -6    0.38    0.21
   1   2  -6    0.72    0.10
  -1  -2  -6    0.29    0.12
   1  -2   6    0.44    0.21
   1  -2   6    0.38    0.15
   1  -2  -6    0.46    0.10
  -1   2  -6    0.24    0.13
  -1  -2   6    0.48    0.17
  -1   2  -6    0.43    0.15
   1  -2  -6    0.63    0.14
   1  -2  -6    0.50    0.21
   1   2   6    0.23    0.12
  -1   2  -6    0.30    0.23
   1  -2  -6    0.66    0.23
  -2   2   6    0.17    0.13
   2  -2   6    0.42    0.17
  -2   2   6    0.57    0.23
  -2  -2  -6    0.29    0.13
   2  -2   6    0.06    0.20
   2  -2   6    0.23    0.17
   2   2  -6    0.41    0.27
  -2  -2   6    0.36    0.23
   2  -2  -6    0.26    0.14
   2   2   6    0.25    0.12
   2   2   6    0.21    0.22
  -2  -2   6    0.07    0.25
   2  -2  -6    0.15    0.14
  -3  -2  -6   67.49    3.43
   3  -2   6   69.12    3.50
  -3   2   6   67.85    3.55
   3  -2   6   66.26    3.50
   3   2  -6   67.57    3.48
   3  -2  -6   64.89    3.45
   3   2   6   67.03    3.44
  -3  -2   6   67.57    3.57
   3  -2  -6   67.46    3.48
  -3   2  -6   66.13    3.46
   3   2   6   66.76    3.50
   4  -2   6   15.60    0.88
  -4  -2  -6   12.87    0.84
   4   2  -6   14.75    0.89
   4  -2   6   15.08    0.97
  -4   2   6   15.43    1.11
   4   2   6   13.95    0.90
   4  -2  -6   13.72    0.90
  -4  -2   6   15.76    1.09
   4   2   6   15.16    0.86
   5   2  -6    1.38    0.29
  -5   2   6    1.72    0.55
   5  -2   6    1.52    0.34
   5  -2   6    2.02    0.44
   5   2   6    1.15    0.34
   5  -2  -6    0.63    0.32
   5   2   6    1.54    0.33
  -5  -2   6    1.32    0.55
  -6   2   6    4.43    0.79
   6  -2   6    5.24    0.65
   6  -2   6    5.54    0.58
   6   2  -6    7.25    0.61
   6   2   6    6.18    0.57
  -6  -2   6    5.86    0.90
   6  -2  -6    5.99    0.62
   6   2   6    6.14    0.63
   7  -2   6    4.42    0.67
   7   2  -6    4.85    0.57
   7  -2   6    4.47    0.61
  -7   2   6    4.11    0.97
   7   2   6    4.08    0.59
   7  -2  -6    6.00    0.68
  -7  -2   6    4.49    0.92
  -8   2   6    1.26    0.91
   8  -2   6    1.64    0.60
   8   2  -6    0.94    0.54
   8  -2   6    1.86    0.71
   8  -2  -6    0.65    0.62
  -8  -2   6    2.24    0.95
   8   2   6    0.99    0.54
   9  -2   6   -0.04    0.65
   9  -2   6   -0.77    0.77
   9   2  -6    0.58    0.72
  -9   2   6    1.04    1.24
   9   2  -6    0.77    0.69
   9  -2  -6   -0.63    0.69
   9   2   6   -0.28    0.70
   0   3  -6   25.05    1.25
   0  -3  -6   24.04    1.28
   0   3   6   22.02    1.25
   0  -3   6   23.54    1.26
   0   3   6   26.37    1.43
   0   3  -6   23.78    1.26
   0  -3  -6   24.02    1.25
   0  -3   6   23.65    1.25
   0  -3  -6   23.74    1.33
   0  -3   6   24.13    1.32
  -1  -3  -6   60.96    2.96
  -1   3   6   57.58    2.97
  -1   3   6   58.40    3.01
   1   3  -6   58.04    2.97
   1  -3   6   56.05    2.97
   1  -3   6   53.20    2.97
  -1  -3  -6   57.74    2.95
   1  -3   6   58.28    3.03
  -1   3  -6   56.30    2.97
   1   3   6   65.94    3.05
  -1   3  -6   57.60    2.98
  -1  -3   6   58.96    3.03
   1  -3  -6   57.58    2.99
   1  -3  -6   56.92    3.02
   1  -3  -6   57.27    3.04
  -1  -3   6   58.27    3.02
   1  -3  -6   58.57    2.97
   2   3  -6   16.81    1.04
   2  -3   6   16.51    0.99
   2  -3   6   17.80    0.94
  -2  -3  -6   16.68    0.89
   2  -3   6   16.67    1.02
  -2   3   6   17.64    0.93
  -2   3   6   16.95    1.01
  -2  -3   6   18.35    1.06
   2   3   6   16.26    0.99
   2   3   6   16.40    0.89
  -2   3  -6   16.56    0.92
  -2  -3   6   17.93    1.02
   2  -3  -6   16.56    0.96
   2  -3  -6   17.16    0.93
  -2   3  -6   17.43    0.96
  -3   3   6    8.65    0.71
  -3   3   6    8.71    0.57
   3  -3   6    9.18    0.57
   3  -3   6    8.73    0.69
  -3  -3  -6    8.67    0.49
   3  -3   6    7.48    0.67
  -3  -3   6    8.20    0.73
   3   3   6    8.54    0.50
   3   3   6    8.56    0.64
   3  -3  -6    8.92    0.60
  -3  -3   6    9.24    0.69
  -4   3   6   12.83    1.00
   4  -3   6   12.63    0.92
   4   3  -6   13.86    0.86
   4  -3   6   15.07    0.84
  -4  -3   6   13.79    1.06
   4   3   6   13.86    0.79
   4   3   6   13.35    0.91
   4  -3  -6   13.20    0.86
  -5   3   6    5.05    0.70
   5   3  -6    5.55    0.50
   5  -3   6    4.77    0.60
   5  -3   6    5.34    0.49
   5   3   6    5.49    0.45
  -5  -3   6    4.94    0.74
   5  -3  -6    5.39    0.53
   5   3   6    4.50    0.54
  -6   3   6    9.58    1.05
   6   3  -6   10.88    0.84
   6  -3   6   11.38    0.86
  -6  -3   6   14.15    1.25
   6  -3  -6   11.07    0.87
   6   3   6   11.91    0.92
   7  -3   6   11.26    0.99
   7  -3   6   11.57    0.93
   7   3  -6   11.93    0.92
  -7   3   6   10.91    1.24
   7   3   6   12.47    0.98
   7  -3  -6   12.26    0.97
  -7  -3   6    9.54    1.21
   8  -3   6    1.73    0.63
   8   3  -6    1.21    0.52
  -8   3   6    0.53    0.91
   8  -3   6    1.36    0.75
   8   3   6    1.46    0.63
  -8  -3   6    1.19    1.04
   8  -3  -6    1.41    0.59
   9   3  -6    0.29    0.69
  -9   3   6    0.46    1.11
   9  -3   6    0.59    0.73
   9  -3   6    0.05    0.84
   9   3  -6   -0.17    0.68
   9   3   6   -0.32    0.71
   9  -3  -6   -0.17    0.74
   0   4   6   77.12    3.96
   0  -4   6   75.91    3.91
   0   4   6   75.36    3.92
   0  -4   6   80.11    3.97
   0   4  -6   79.77    3.92
   0   4  -6   72.79    3.90
   0  -4  -6   77.23    3.90
   0  -4   6   74.81    3.91
  -1  -4  -6   12.62    0.71
   1   4  -6   12.68    0.73
   1   4  -6   12.50    0.88
  -1  -4  -6   14.22    0.70
   1  -4   6   13.22    0.70
   1  -4   6   11.76    0.75
  -1   4   6   13.74    0.80
  -1   4   6   11.94    0.76
  -1   4   6   13.06    0.74
   1  -4   6   13.48    0.82
  -1  -4   6   13.17    0.81
  -1   4  -6   12.91    0.70
  -1  -4   6   14.07    0.80
   1  -4  -6   12.31    0.74
   1  -4  -6   13.00    0.74
   1   4   6   15.48    0.84
  -1   4  -6   12.54    0.77
   2  -4   6    4.22    0.46
  -2   4   6    3.51    0.37
   2  -4   6    4.02    0.32
  -2   4   6    3.72    0.32
  -2  -4   6    3.85    0.44
  -2  -4   6    3.52    0.39
  -2   4  -6    4.12    0.29
  -2   4  -6    4.00    0.35
   2  -4  -6    3.42    0.34
   2   4   6    3.21    0.38
   3  -4   6    1.21    0.36
   3  -4   6    1.87    0.24
  -3   4   6    2.12    0.28
  -3   4   6    2.18    0.40
   3   4   6    1.31    0.30
  -3   4  -6    2.02    0.34
   3  -4  -6    1.65    0.28
  -3  -4   6    1.64    0.46
  -3  -4   6    1.61    0.38
   4  -4   6   12.74    1.01
  -4   4   6   13.34    1.07
   4   4  -6   15.05    0.89
   4  -4   6   15.07    0.85
   4   4   6   13.99    0.76
   4   4   6   14.19    0.96
  -4  -4   6   14.85    1.16
   4  -4  -6   12.88    0.90
  -5   4   6   10.56    0.99
   5   4  -6   11.88    0.81
   5  -4   6   12.75    0.95
   5  -4   6   12.61    0.79
   5   4   6   11.45    0.85
   5  -4  -6   10.58    0.84
  -5  -4   6   11.06    1.06
   6  -4   6   11.73    0.86
  -6   4   6    9.16    1.04
   6   4  -6   12.46    0.84
   6  -4   6    9.16    0.90
  -6  -4   6   10.27    1.13
   6   4   6   10.80    0.88
   6  -4  -6   12.59    0.94
   7  -4   6    2.48    0.68
  -7   4   6    1.69    0.87
   7   4  -6    2.81    0.51
   7  -4   6    1.47    0.51
  -7  -4   6    2.30    0.86
   7   4   6    1.44    0.52
   7  -4  -6    2.65    0.61
   8   4  -6    0.26    0.53
   8  -4   6   -0.38    0.59
   8   4  -6    0.55    0.57
   8  -4   6   -0.91    0.71
  -8   4   6   -0.73    0.95
   8   4   6    0.17    0.62
   8  -4  -6   -0.25    0.65
   9   4  -6    2.19    0.72
  -9   4   6    3.18    1.31
   9  -4   6    0.29    0.97
   9  -4  -6    1.20    0.85
   9   4   6    1.30    0.79
   0  -5   6    0.37    0.29
   0   5   6    1.05    0.18
   0   5  -6    0.93    0.15
   0   5   6    0.63    0.27
   0   5  -6    1.02    0.21
   0  -5   6    1.02    0.20
   0   5   6    1.38    0.22
   0  -5  -6    1.14    0.18
   1   5  -6   32.64    1.80
  -1  -5  -6   34.38    1.75
  -1   5   6   34.55    1.82
   1  -5   6   35.56    1.86
  -1   5   6   32.13    1.80
  -1   5   6   33.19    1.79
   1   5  -6   33.19    1.79
  -1  -5  -6   33.98    1.74
  -1   5  -6   33.22    1.73
  -1  -5   6   33.87    1.83
   1   5   6   35.75    1.80
  -1   5  -6   34.79    1.80
  -1  -5   6   34.09    1.85
   1  -5  -6   33.93    1.80
   1   5   6   34.23    1.87
   2  -5   6   44.21    2.33
   2  -5   6   45.08    2.30
   2  -5   6   43.87    2.44
  -2   5   6   46.65    2.40
  -2   5   6   45.05    2.36
   2   5  -6   45.06    2.35
  -2  -5   6   46.26    2.44
  -2   5  -6   44.36    2.38
   2   5   6   43.81    2.41
   2  -5  -6   46.13    2.38
  -2  -5   6   44.33    2.42
   3  -5   6   22.24    1.24
   3  -5   6   22.32    1.32
   3  -5   6   23.84    1.39
  -3   5   6   23.93    1.40
  -3   5   6   22.15    1.29
   3  -5  -6   24.58    1.34
  -3  -5   6   22.77    1.46
  -3  -5   6   23.62    1.36
   3   5   6   24.18    1.38
  -3   5  -6   22.49    1.34
  -4   5   6   25.48    1.57
   4  -5   6   24.96    1.58
   4  -5   6   25.58    1.53
  -4   5   6   28.49    1.48
  -4  -5   6   25.09    1.54
  -4  -5   6   25.50    1.70
   4   5   6   25.48    1.51
   4  -5  -6   25.09    1.51
   5  -5   6    3.26    0.39
   5  -5   6    1.39    0.57
   5   5  -6    3.57    0.43
  -5   5   6    2.82    0.63
   5  -5  -6    3.11    0.47
  -5  -5   6    3.33    0.74
   5   5   6    2.94    0.49
  -6   5   6    4.74    0.87
   6   5  -6    5.57    0.57
   6  -5   6    5.57    0.55
   6  -5   6    3.82    0.66
   6   5   6    5.59    0.63
  -6  -5   6    4.20    0.85
   6  -5  -6    3.31    0.57
   7   5  -6    2.29    0.53
  -7   5   6    3.38    0.97
   7  -5   6    2.64    0.68
   7   5  -6    3.62    0.55
  -7  -5   6    2.82    0.92
   7   5   6    3.37    0.65
   7  -5  -6    2.58    0.60
  -8   5   6    1.66    1.04
   8  -5   6    0.68    0.72
   8   5  -6    0.53    0.62
   8   5   6    1.18    0.60
   8  -5  -6    0.78    0.64
  -9   5   6    6.38    1.49
   9  -5   6    3.18    1.02
   9   5  -6    5.58    0.95
   9   5   6    5.32    0.98
   9  -5  -6    3.40    0.98
   0   6  -6    7.43    0.45
   0  -6  -6    7.95    0.51
   0   6   6    7.53    0.50
   0  -6   6    7.63    0.62
   0   6  -6    8.10    0.55
   0   6   6    7.14    0.58
   0  -6   6    7.07    0.49
   0   6   6    7.71    0.52
   1   6  -6   18.07    1.01
  -1  -6  -6   17.70    0.95
   1   6  -6   16.23    1.00
  -1   6   6   18.74    1.04
   1  -6   6   16.35    1.09
  -1  -6  -6   19.57    0.96
  -1   6   6   17.73    1.01
   1  -6  -6   16.79    1.01
  -1   6  -6   17.55    1.03
  -1  -6   6   17.33    1.08
   1   6   6   17.51    1.01
   1   6   6   17.66    1.08
  -1  -6   6   17.86    1.06
   2  -6   6   17.16    1.20
  -2   6   6   17.36    1.10
  -2   6   6   18.51    1.08
   2   6  -6   18.38    1.06
   2   6   6   20.17    1.18
  -2   6  -6   19.84    1.09
   2  -6  -6   18.91    1.10
  -2  -6   6   18.92    1.20
  -2  -6   6   18.46    1.15
  -3   6   6   31.86    1.84
  -3   6   6   34.78    1.76
   3  -6   6   31.49    1.86
   3  -6   6   32.04    1.68
  -3   6  -6   32.29    1.80
  -3  -6   6   33.07    1.92
  -3  -6   6   32.42    1.83
   3  -6  -6   31.03    1.80
   3   6   6   31.24    1.83
  -4   6   6   10.52    0.86
  -4   6   6    8.00    0.65
   4  -6   6    8.72    0.59
   4  -6   6    8.64    0.80
  -4  -6   6    7.45    0.72
   4  -6  -6    8.56    0.72
  -4  -6   6    9.40    0.87
   4   6   6    7.15    0.68
  -4   6  -6    7.97    0.70
   5  -6   6    5.61    0.68
   5   6  -6    5.47    0.55
  -5   6   6    5.81    0.76
   5  -6  -6    7.37    0.69
   5   6   6    6.34    0.65
  -6   6   6    5.72    0.94
   6  -6   6    6.85    0.81
   6   6  -6    8.19    0.73
   6   6  -6    6.80    0.65
   6  -6  -6    7.05    0.74
   6   6   6    6.27    0.75
  -7   6   6    5.88    1.09
   7  -6   6    6.66    0.91
   7   6  -6    7.44    0.81
   7   6  -6    7.46    0.74
   7   6   6    7.47    0.85
   7  -6  -6    5.39    0.84
   8  -6   6    0.78    0.83
  -8   6   6   -0.32    1.03
   8   6   6    1.62    0.74
   8  -6  -6    0.27    0.69
   0   7   6   13.35    0.84
   0  -7  -6   13.11    0.82
   0  -7   6   13.74    0.95
   0   7   6   13.68    0.96
   0   7  -6   13.28    0.70
   0   7   6   12.50    0.88
   0   7  -6   14.11    0.83
  -1  -7  -6    8.88    0.55
  -1   7   6    9.95    0.66
   1   7  -6    8.78    0.61
   1   7  -6    8.35    0.54
  -1   7   6    7.73    0.64
   1  -7   6    8.26    0.73
   1  -7  -6    8.94    0.64
  -1  -7   6    9.38    0.72
   1   7   6    8.95    0.62
   1   7   6   10.03    0.74
  -1   7  -6   10.03    0.69
   2  -7   6    2.22    0.45
  -2   7   6    1.42    0.31
   2   7  -6    1.83    0.26
   2   7  -6    1.63    0.30
  -2   7   6    1.53    0.34
   2   7   6    2.53    0.44
   2  -7  -6    1.85    0.35
  -2  -7   6    2.28    0.42
  -2   7  -6    1.41    0.34
   3   7  -6    4.49    0.45
  -3   7   6    3.62    0.45
  -3   7   6    4.11    0.54
   3  -7   6    3.75    0.56
  -3   7  -6    4.02    0.48
  -3  -7   6    4.11    0.62
   3   7   6    3.15    0.49
   3  -7  -6    4.54    0.52
  -3  -7   6    3.98    0.52
  -4   7   6    6.58    0.59
   4   7  -6    5.35    0.53
   4  -7   6    5.15    0.66
  -4   7   6    4.61    0.65
   4  -7  -6    6.09    0.72
  -4  -7   6    5.54    0.64
  -4   7  -6    7.28    0.74
   5   7  -6    2.85    0.45
  -5   7   6    1.53    0.65
  -5   7   6    2.89    0.51
   5  -7   6    2.81    0.63
   5   7  -6    4.15    0.53
   5   7   6    3.17    0.54
   5  -7  -6    3.58    0.61
   6   7  -6    6.40    0.69
  -6   7   6    4.75    0.89
   6  -7   6    5.08    0.81
   6   7  -6    5.99    0.65
   6  -7  -6    7.41    0.83
   6   7   6    4.45    0.67
   7   7  -6    3.13    0.69
   7  -7   6    4.03    0.87
  -7   7   6    2.98    1.04
   7   7   6    3.89    0.70
   7  -7  -6    3.66    0.81
   8   7  -6    0.63    0.70
   8  -7   6   -0.13    0.77
   8  -7  -6    0.92    0.75
   8   7   6    0.39    0.74
   0  -8   6   12.90    0.99
   0   8  -6   16.00    0.94
   0  -8  -6   14.23    0.94
   0   8   6   14.80    0.92
   0   8   6   15.39    0.98
   1  -8   6   -0.20    0.41
   1   8  -6    0.75    0.31
  -1   8   6    0.35    0.30
   1   8  -6   -0.06    0.17
  -1  -8  -6    0.37    0.22
  -1   8   6   -0.23    0.28
  -1  -8   6    0.08    0.37
   1   8   6    0.27    0.39
   1  -8  -6    0.21    0.32
  -1   8  -6    0.06    0.34
   1   8   6    0.13    0.26
  -2   8   6    5.20    0.51
   2  -8   6    5.18    0.60
  -2   8   6    5.04    0.50
   2   8  -6    4.17    0.45
   2   8  -6    4.70    0.41
   2   8   6    5.09    0.49
   2  -8  -6    4.73    0.52
  -2   8  -6    5.25    0.53
  -2  -8   6    4.77    0.56
   2   8   6    4.38    0.57
   3  -8   6    0.70    0.46
  -3   8   6    1.10    0.42
   3   8  -6    0.57    0.30
   3   8  -6    1.04    0.34
  -3   8   6    0.17    0.30
   3  -8  -6   -0.09    0.39
  -3   8  -6    0.77    0.41
  -3  -8   6    0.54    0.41
   3   8   6    1.36    0.46
   4   8  -6    5.07    0.54
  -4   8   6    4.20    0.55
   4  -8   6    4.91    0.67
  -4   8   6    5.52    0.69
   4   8   6    5.13    0.62
  -4   8  -6    4.74    0.62
   4  -8  -6    6.32    0.68
  -4  -8   6    5.23    0.65
  -5   8   6   15.82    1.27
   5   8  -6   14.43    1.03
  -5   8   6   14.25    1.10
   5   8  -6   15.75    1.08
   5  -8   6   14.30    1.21
   5  -8  -6   15.24    1.14
  -5   8  -6   15.30    1.10
   5   8   6   14.45    1.19
   6   8  -6    5.97    0.65
   6  -8   6    6.26    0.89
  -6   8   6    5.67    1.01
   6   8   6    4.73    0.70
   6  -8  -6    3.67    0.71
   7   8  -6    5.99    0.81
   7  -8   6    5.04    0.95
   7   8   6    6.47    0.85
   7  -8  -6    5.51    1.04
   8  -8   6    1.84    0.99
   8   8  -6    1.43    0.76
   8  -8  -6   -0.39    0.92
   8   8   6    0.86    0.72
   0  -9  -6   -0.35    0.32
   0   9  -6    0.14    0.32
   0   9   6   -0.03    0.32
   0  -9   6    0.59    0.44
   0   9   6    0.43    0.35
   1  -9   6    6.20    0.67
  -1   9   6    6.65    0.61
   1   9  -6    7.54    0.63
  -1   9   6    6.45    0.56
   1   9   6    7.16    0.62
  -1  -9   6    6.68    0.66
   1   9   6    6.71    0.67
  -1   9  -6    6.46    0.60
   1  -9  -6    7.05    0.63
   2   9  -6   11.39    0.85
  -2   9   6   12.92    0.86
   2  -9   6    9.28    0.92
  -2   9   6   11.51    0.84
   2   9   6   11.89    0.84
   2  -9  -6   12.82    0.93
   2   9   6   11.72    0.94
  -2  -9   6   13.50    0.96
  -3   9   6    9.35    0.86
  -3   9   6    9.58    0.81
   3  -9   6   12.27    1.00
   3   9  -6   10.94    0.79
   3   9  -6   12.02    0.85
  -3   9  -6   10.83    0.84
   3   9   6   10.24    0.82
  -3  -9   6   10.03    0.85
   3   9   6   11.33    0.92
   3  -9  -6   13.08    0.94
  -4   9   6    3.46    0.53
   4   9  -6    3.19    0.47
   4  -9   6    2.65    0.64
   4   9  -6    3.71    0.50
  -4   9   6    3.89    0.66
  -4  -9   6    2.84    0.60
   4  -9  -6    3.15    0.59
   4   9   6    3.12    0.57
  -4   9  -6    3.05    0.57
  -5   9   6    2.64    0.59
   5   9  -6    3.59    0.57
   5  -9   6    3.53    0.74
  -5   9  -6    3.63    0.62
   5  -9  -6    3.45    0.74
   5   9   6    3.88    0.70
   6   9  -6    0.17    0.52
   6  -9   6    0.12    0.75
   6   9   6    0.44    0.66
   6  -9  -6    0.23    0.71
   7  -9   6    0.52    0.79
   7   9  -6    0.09    0.65
   7  -9  -6   -0.47    0.81
   7   9   6   -0.25    0.66
   0  10   6    1.66    0.40
   0  10   6    2.17    0.45
   0  10  -6    1.58    0.45
   0 -10   6    1.17    0.50
  -1  10   6    6.15    0.60
  -1  10   6    6.35    0.58
   1 -10   6    6.45    0.72
   1  10  -6    6.07    0.62
   1 -10  -6    7.23    0.67
   1  10   6    7.47    0.66
   1  10   6    7.04    0.69
  -1 -10   6    5.28    0.66
  -1  10  -6    5.63    0.64
   2 -10   6    4.12    0.66
   2  10  -6    5.92    0.62
  -2  10   6    5.49    0.58
  -2  10   6    5.04    0.61
  -2  10  -6    6.94    0.67
   2  10   6    5.24    0.67
  -2 -10   6    7.35    0.70
   2 -10  -6    5.80    0.67
   2  10   6    6.36    0.63
  -3  10   6   19.24    1.20
   3 -10   6   18.10    1.36
   3  10  -6   16.26    1.17
  -3 -10   6   14.91    1.25
   3  10   6   17.10    1.29
   3  10   6   16.81    1.14
   3 -10  -6   19.66    1.32
  -3  10  -6   17.50    1.17
  -4  10   6    7.30    0.71
   4  10  -6    6.98    0.70
   4 -10   6    7.58    0.91
   4 -10  -6    8.03    0.87
   4  10   6    6.17    0.70
   4  10   6    7.51    0.85
  -4 -10   6    7.81    0.91
  -4  10  -6    7.37    0.75
   5  10  -6    2.21    0.57
  -5  10   6    3.16    0.65
   5 -10   6    3.79    0.77
   5  10  -6    3.42    0.56
   5 -10  -6    2.59    0.69
   5  10   6    3.44    0.75
  -5  10  -6    2.02    0.59
   6  10  -6    1.09    0.63
   6  10  -6    1.92    0.59
   6 -10   6    0.74    0.83
  -6  10   6    0.75    0.66
   6  10   6    0.13    0.71
   6 -10  -6    1.97    0.87
   7 -10   6    3.20    1.02
   7  10  -6    4.60    0.94
   7 -10  -6    2.03    0.97
   7  10   6    4.19    0.96
   0  11   6    0.48    0.41
   0 -11   6    1.85    0.53
   0  11   6    0.88    0.39
   0  11  -6    0.87    0.43
   1  11  -6   15.00    1.05
   1 -11   6   15.60    1.19
  -1  11   6   14.31    1.09
   1  11   6   14.77    1.11
  -1 -11   6   14.94    1.17
   1  11   6   14.49    1.07
  -1  11  -6   13.52    1.05
   2  11  -6    1.73    0.46
  -2  11   6    1.92    0.52
   2 -11   6    0.77    0.54
  -2  11  -6    1.06    0.53
   2  11   6    1.51    0.49
   2 -11  -6    1.20    0.58
   3  11  -6    0.62    0.50
   3 -11   6    0.27    0.60
  -3  11   6    0.23    0.48
   3  11   6   -0.04    0.58
   3  11   6    0.23    0.49
  -3  11  -6   -0.16    0.50
   3 -11  -6    0.07    0.60
  -4  11   6    0.27    0.52
   4  11  -6    0.70    0.52
   4 -11   6    0.82    0.71
   4 -11  -6   -0.12    0.70
   4  11   6    0.99    0.64
   4  11   6    1.63    0.51
  -4  11  -6    0.91    0.54
  -5  11   6    7.19    0.84
   5 -11   6    5.57    1.02
   5  11  -6    7.04    0.78
   5 -11  -6    6.49    0.99
  -5  11  -6    7.01    0.84
   5  11   6    5.50    0.85
   5  11   6    6.49    0.75
  -6  11   6    4.53    0.79
   6 -11   6    5.12    1.07
   6 -11  -6    5.32    1.03
   0  12   6    0.16    0.44
   0  12  -6    0.01    0.46
   0 -12   6   -0.30    0.54
  -1  12   6    2.78    0.58
   1  12  -6    3.85    0.63
   1 -12   6    3.73    0.73
  -1  12  -6    2.35    0.62
   1  12   6    2.59    0.54
  -1 -12   6    3.12    0.68
   2  12  -6    4.91    0.69
  -2  12   6    3.34    0.60
   2 -12   6    5.42    0.84
  -2 -12   6    5.11    0.75
   2  12   6    4.69    0.63
  -2  12  -6    5.41    0.68
   3  12  -6    0.23    0.52
  -3  12   6    1.06    0.56
   3 -12   6    0.31    0.72
  -3  12  -6    0.95    0.60
   3  12   6    0.34    0.49
   3 -12  -6    0.38    0.73
   3  12   6   -0.21    0.65
   4  12  -6   -0.07    0.52
  -4  12   6    0.13    0.57
   4 -12   6    0.20    0.78
   4 -12  -6   -0.39    0.78
   4  12   6   -1.33    0.68
  -4  12  -6    0.03    0.57
   4  12   6   -0.07    0.58
  -5  12   6    2.67    0.69
   5 -12   6    2.92    0.97
   5  12   6    2.82    0.67
  -5  12  -6    3.14    0.82
   5 -12  -6    2.16    0.95
   5  12   6    1.63    0.85
   0  13  -6    0.34    0.59
   0  13   6   -0.23    0.54
   0 -13   6    0.00    0.61
   1  13  -6    0.27    0.59
   1 -13   6    0.81    0.69
  -1  13   6   -0.03    0.56
  -1  13  -6    1.05    0.62
  -1 -13   6    0.50    0.68
   1  13   6    0.42    0.53
  -2  13   6    0.32    0.54
   2  13  -6    0.44    0.62
   2 -13   6    0.24    0.70
  -2  13  -6   -0.20    0.55
   2  13   6    0.67    0.53
   3  13  -6    1.74    0.62
  -3  13   6    2.27    0.68
   3 -13   6    1.62    0.85
   3  13   6    2.76    0.74
   4  13  -6    2.47    0.73
   4 -13   6    2.18    0.94
  -4  13   6    1.03    0.71
   4 -13  -6    1.16    0.96
   4  13   6    2.22    0.67
  -4  13  -6    1.44    0.69
   0 -14   6   -0.34    0.72
   0  14   6    0.38    0.65
  -1  14   6   -0.57    0.62
   1 -14   6    0.84    0.79
  -1  14  -6   -0.90    0.66
   1  14   6    0.02    0.66
   2  14  -6    1.24    0.67
   2 -14   6    2.96    0.90
  -2  14   6    0.82    0.71
  -2  14  -6    1.98    0.69
   2  14   6    2.88    0.75
   3 -14   6    1.92    0.96
  -3  14   6    1.68    0.67
   3  14  -6   -0.09    0.65
   3  14   6    1.20    0.73
  -3  14  -6    1.33    0.77
   0  15   6    0.17    0.67
   0  15  -6   -0.77    0.74
   1  15  -6    1.22    0.81
  -1  15   6   -0.18    0.74
  -1  15  -6    0.46    0.71
   1  15   6    0.76    0.77
   0   0  -7    0.11    0.19
   0   0   7    0.13    0.17
   0   0   7    0.04    0.16
   0   0  -7    0.07    0.23
   0   0   7   -0.02    0.04
   1   0   7   97.94    4.97
   1   0   7   98.38    4.99
   1   0  -7   96.08    4.99
  -1   0  -7   96.51    4.98
   1   0  -7   98.81    4.98
  -1   0  -7   95.48    4.97
   2   0   7   24.54    1.27
  -2   0   7   24.05    1.32
   2   0  -7   23.11    1.27
  -2   0  -7   23.04    1.27
   2   0   7   23.47    1.29
   2   0  -7   21.83    1.20
  -3   0   7    6.90    0.61
   3   0   7    4.83    0.44
   3   0  -7    5.64    0.42
   3   0  -7    5.17    0.42
  -3   0  -7    5.77    0.46
   4   0   7   26.59    1.54
   4   0  -7   27.29    1.52
   4   0   7   27.57    1.53
  -4   0   7   28.33    1.71
  -5   0   7   -0.07    0.51
   5   0   7   -0.16    0.34
   5   0  -7    0.24    0.29
   5   0   7    0.11    0.29
   6   0   7    9.54    0.79
  -6   0   7    9.29    1.02
   6   0  -7   10.56    0.77
   7   0  -7    1.09    0.47
   7   0   7    0.97    0.53
  -7   0   7    0.80    0.74
   7   0   7    2.05    0.52
  -8   0   7   -0.10    0.99
   8   0   7    1.21    0.61
   8   0  -7    0.91    0.58
  -9   0   7    3.75    1.33
   0   1  -7    9.82    0.66
   0   1   7   11.58    0.70
   0   1   7   10.68    0.56
   0   1  -7   10.02    0.68
   0   1   7   11.49    0.65
   0  -1   7   10.20    0.55
   0  -1   7   10.29    0.65
   0  -1  -7   10.61    0.69
   0  -1   7   11.45    0.64
   1  -1   7   70.34    3.53
   1   1  -7   68.73    3.45
   1  -1   7   68.67    3.52
  -1  -1  -7   65.46    3.53
   1   1  -7   68.69    3.52
  -1  -1  -7   68.25    3.50
   1   1  -7   64.81    3.55
  -1   1   7   70.73    3.53
  -1   1   7   69.29    3.54
   1   1   7   68.31    3.51
   1   1   7   71.67    3.57
   1  -1  -7   65.28    3.54
  -1  -1   7   67.22    3.54
   1  -1  -7   67.68    3.54
  -1  -1   7   70.59    3.53
   1  -1  -7   68.45    3.45
  -1   1  -7   67.69    3.52
  -1   1  -7   66.48    3.52
   2  -1   7   52.47    2.81
  -2  -1  -7   54.98    2.82
   2  -1   7   53.38    2.84
  -2   1   7   55.68    2.88
   2  -1   7   54.71    2.86
   2  -1  -7   52.86    2.78
  -2  -1   7   56.72    2.89
  -2   1  -7   54.49    2.85
   2   1   7   54.37    2.81
   2  -1  -7   53.87    2.83
   2   1   7   54.41    2.85
  -2   1  -7   54.14    2.82
  -2  -1   7   56.90    2.89
  -3  -1  -7   26.69    1.51
  -3   1   7   28.89    1.62
   3   1  -7   29.49    1.53
   3  -1   7   28.64    1.54
   3  -1   7   27.57    1.55
   3  -1  -7   27.77    1.53
   3   1   7   28.41    1.56
   3   1   7   27.62    1.50
  -3  -1   7   28.78    1.63
   3  -1  -7   27.02    1.48
  -4  -1  -7    7.06    0.55
  -4   1   7    6.65    0.70
   4   1  -7    7.63    0.56
   4  -1   7    6.91    0.57
   4  -1   7    7.12    0.54
   4   1   7    6.60    0.52
  -4  -1   7    5.75    0.72
   4  -1  -7    6.34    0.54
   4   1   7    6.08    0.55
   5  -1   7    8.85    0.67
   5  -1   7    7.81    0.67
   5   1  -7    7.90    0.63
  -5   1   7    6.39    0.80
   5   1   7    7.05    0.60
   5   1   7    6.78    0.63
  -5  -1   7    7.65    0.84
   5  -1  -7    7.70    0.62
  -6   1   7    3.65    0.76
   6  -1   7    4.48    0.59
   6  -1   7    5.32    0.55
   6   1  -7    4.74    0.53
   6  -1  -7    3.80    0.49
   6   1   7    3.35    0.50
   6   1   7    3.78    0.52
  -6  -1   7    3.67    0.76
   7   1  -7    2.98    0.50
   7  -1   7    3.42    0.63
  -7   1   7    3.31    0.85
   7  -1   7    3.33    0.56
   7   1   7    2.58    0.54
   7  -1  -7    3.55    0.58
   7   1   7    3.17    0.66
  -7  -1   7    1.97    0.85
   8  -1   7   10.06    0.94
   8   1  -7    9.65    0.91
   8  -1   7   10.40    1.01
  -8   1   7   10.60    1.39
  -8  -1   7    8.77    1.30
   8   1   7    9.18    0.96
   8  -1  -7    9.69    0.97
   9  -1   7    0.07    0.70
  -9   1   7    1.28    1.25
   9   1  -7    0.08    0.67
   9  -1  -7    0.46    0.72
   9   1   7    0.93    0.75
  -9  -1   7   -0.24    1.21
   0  -2   7   38.56    2.11
   0  -2   7   40.33    2.07
   0   2   7   42.29    2.12
   0   2   7   39.72    2.04
   0  -2   7   39.41    2.04
   0   2  -7   39.52    2.04
   0   2  -7   36.96    2.13
   0   2   7   39.69    2.09
   0  -2  -7   41.86    2.09
   1   2  -7   15.03    0.87
   1  -2   7   14.87    0.84
  -1   2   7   15.40    0.82
   1  -2   7   15.85    0.91
   1  -2   7   15.70    0.88
  -1   2   7   17.11    0.90
   1   2  -7   15.57    0.82
   1  -2  -7   15.86    0.87
  -1   2  -7   15.75    0.85
  -1  -2   7   15.17    0.90
  -1   2  -7   15.43    0.89
   1   2   7   15.47    0.86
  -1  -2   7   14.99    0.93
   1   2   7   15.16    0.94
   1  -2  -7   16.01    0.82
   1  -2  -7   15.91    0.94
   2  -2   7   24.81    1.39
   2  -2   7   24.87    1.32
  -2  -2  -7   24.62    1.31
  -2   2   7   24.44    1.30
  -2   2   7   22.37    1.39
   2  -2   7   24.02    1.34
   2  -2  -7   25.29    1.30
   2   2   7   25.69    1.31
   2  -2  -7   26.26    1.35
  -2   2  -7   24.50    1.33
  -2  -2   7   24.76    1.40
  -2  -2   7   25.17    1.41
   2   2   7   23.83    1.38
  -3  -2  -7    0.39    0.19
   3  -2   7    0.63    0.29
   3  -2   7    0.38    0.22
  -3   2   7    0.16    0.28
   3   2   7    0.43    0.18
   3   2   7    1.02    0.26
   3  -2  -7    0.69    0.22
  -3  -2   7    0.16    0.34
   3  -2  -7    0.43    0.21
  -3  -2   7    1.02    0.32
  -4   2   7    2.12    0.49
   4   2  -7    3.00    0.37
   4  -2   7    3.23    0.36
  -4  -2  -7    2.86    0.33
   4  -2   7    1.99    0.40
   4  -2  -7    2.97    0.36
  -4  -2   7    2.45    0.57
   4   2   7    4.39    0.45
   4   2   7    3.71    0.34
   5   2  -7    3.94    0.45
   5  -2   7    3.96    0.54
   5  -2   7    5.33    0.49
  -5   2   7    3.73    0.72
   5   2   7    5.10    0.55
   5  -2  -7    4.27    0.49
  -5  -2   7    5.40    0.78
   5   2   7    3.77    0.43
   6   2  -7    4.09    0.54
   6  -2   7    4.96    0.63
  -6   2   7    4.33    0.77
   6  -2   7    4.90    0.53
   6  -2  -7    4.78    0.54
   6   2   7    3.98    0.49
   6   2   7    3.98    0.54
  -6  -2   7    4.59    0.86
  -7   2   7   11.66    1.23
   7  -2   7   11.81    1.03
   7   2  -7   12.19    0.97
   7  -2   7   11.96    1.00
  -7  -2   7   12.03    1.33
   7  -2  -7   12.89    1.03
   7   2   7   12.92    1.03
   8   2  -7    1.27    0.56
  -8   2   7    0.63    0.92
   8  -2   7    0.50    0.66
   8  -2   7    1.49    0.59
   8   2   7    0.84    0.61
  -8  -2   7    2.23    0.99
   8  -2  -7    1.86    0.65
   9  -2   7   -0.21    0.71
   9  -2   7   -0.08    0.88
   9   2  -7   -0.30    0.69
  -9   2   7    0.09    1.25
   9   2   7    0.40    0.67
   9  -2  -7    0.18    0.75
  -9  -2   7   -0.19    1.09
   0   3   7   40.09    2.09
   0   3   7   40.33    2.02
   0  -3  -7   39.56    2.02
   0   3  -7   38.17    2.04
   0  -3   7   39.48    2.09
   0  -3  -7   40.14    2.05
   0  -3   7   40.42    2.04
   0  -3   7   33.82    2.01
   0   3  -7   40.13    2.01
   1  -3   7   27.12    1.44
   1   3  -7   26.88    1.47
  -1   3   7   27.36    1.50
   1   3  -7   28.79    1.43
   1  -3   7   29.05    1.53
  -1  -3  -7   27.49    1.44
  -1   3   7   28.12    1.44
   1  -3   7   27.72    1.45
  -1  -3   7   29.19    1.51
   1  -3  -7   25.84    1.43
   1  -3  -7   26.13    1.46
   1  -3  -7   28.63    1.53
  -1   3  -7   26.02    1.45
  -1   3  -7   27.28    1.45
  -1  -3   7   26.33    1.51
   1   3   7   28.52    1.53
   2  -3   7    9.27    0.59
  -2  -3  -7   10.04    0.54
  -2   3   7    9.57    0.56
   2  -3   7    9.19    0.68
  -2   3   7    8.80    0.64
   2  -3  -7    9.69    0.56
   2   3   7    9.26    0.69
  -2   3  -7    9.02    0.60
  -2  -3   7    8.37    0.70
   2  -3  -7    9.20    0.60
   2   3   7    9.12    0.53
  -2  -3   7    8.75    0.66
  -3   3   7   18.92    1.09
  -3   3   7   20.13    1.20
   3  -3   7   20.80    1.20
  -3  -3  -7   19.13    1.03
   3  -3  -7   20.01    1.13
  -3   3  -7   18.25    1.08
  -3  -3   7   19.39    1.24
   3   3   7   19.95    1.04
   3   3   7   18.69    1.15
  -3  -3   7   20.64    1.22
   4   3  -7    5.97    0.50
  -4   3   7    6.08    0.69
   4  -3   7    6.25    0.50
   4  -3   7    5.93    0.60
  -4  -3   7    6.16    0.73
   4  -3  -7    7.58    0.56
   4   3   7    5.47    0.46
   4   3   7    5.99    0.54
  -5   3   7    5.83    0.78
   5  -3   7    6.98    0.55
   5   3  -7    6.26    0.55
   5  -3   7    4.40    0.59
   5   3   7    5.60    0.58
  -5  -3   7    5.87    0.83
   5  -3  -7    5.65    0.56
   5   3   7    6.68    0.49
   6  -3   7    0.64    0.38
  -6   3   7    1.20    0.63
   6  -3   7    0.13    0.53
  -6  -3   7    0.30    0.72
   6  -3  -7    0.64    0.41
   6   3   7    0.31    0.42
   7  -3   7   -0.29    0.43
  -7   3   7   -0.46    0.81
   7   3  -7   -0.14    0.38
   7  -3   7   -0.26    0.59
  -7  -3   7   -0.31    0.77
   7  -3  -7    0.01    0.45
   7   3   7    0.05    0.44
   8   3  -7    9.22    0.88
  -8   3   7    9.97    1.30
   8  -3   7    8.37    0.89
   8  -3   7    7.13    0.98
   8   3   7   10.61    1.00
  -8  -3   7    8.21    1.35
   8  -3  -7    9.40    0.95
  -9   3   7   -0.19    1.13
   9  -3   7   -0.39    0.72
   9   3  -7    1.18    0.65
   9  -3   7   -0.73    0.84
   9   3  -7   -0.21    0.69
   9  -3  -7   -0.26    0.77
   9   3   7   -0.46    0.65
   0  -4   7   13.15    0.78
   0  -4  -7   11.09    0.73
   0  -4   7   11.14    0.70
   0   4   7   12.31    0.79
   0   4  -7   12.42    0.69
   0  -4   7   12.00    0.68
   0  -4  -7   11.52    0.67
   0   4   7   12.47    0.68
   0   4  -7   11.81    0.70
  -1   4   7   46.85    2.41
  -1  -4  -7   52.76    2.38
   1  -4   7   44.12    2.39
  -1   4   7   45.79    2.46
   1  -4   7   43.79    2.48
   1   4  -7   47.97    2.41
   1   4  -7   45.23    2.42
   1  -4   7   43.71    2.42
   1  -4  -7   46.01    2.47
   1  -4  -7   42.64    2.40
  -1  -4   7   47.85    2.49
  -1   4  -7   43.99    2.39
   1   4   7   56.02    2.51
  -1  -4   7   47.54    2.47
   1  -4  -7   45.58    2.45
   2  -4   7   -0.40    0.16
   2   4  -7    0.13    0.15
   2  -4   7    0.42    0.31
  -2   4   7    0.15    0.17
  -2   4   7   -0.03    0.22
   2  -4  -7    0.01    0.23
   2  -4  -7   -0.05    0.18
   2   4   7    0.36    0.27
  -2   4  -7   -0.03    0.15
  -2  -4   7    0.01    0.29
  -2  -4   7   -0.14    0.30
  -2   4  -7    0.19    0.23
  -3   4   7   39.77    2.30
   3  -4   7   41.76    2.21
  -3   4   7   41.51    2.22
   3  -4   7   41.07    2.30
   3   4   7   44.68    2.30
  -3  -4   7   44.35    2.38
   3  -4  -7   41.85    2.26
  -3  -4   7   41.58    2.30
  -4   4   7   12.39    1.02
   4  -4   7   11.98    0.95
   4   4  -7   13.77    0.86
   4  -4   7   12.28    0.82
  -4  -4   7   14.07    1.13
   4   4   7   14.30    0.95
   4  -4  -7   14.42    0.90
   5  -4   7    9.91    0.71
  -5   4   7   10.44    0.95
   5   4  -7   10.60    0.75
   5  -4   7    7.93    0.78
  -5  -4   7    9.65    1.03
   5   4   7   10.40    0.90
   5  -4  -7    8.61    0.81
   6  -4   7    5.38    0.56
  -6   4   7    4.58    0.80
   6  -4   7    5.68    0.73
   6   4  -7    3.86    0.62
   6  -4  -7    5.09    0.63
   6   4   7    5.94    0.66
  -6  -4   7    4.33    0.87
   7  -4   7    0.70    0.62
   7   4  -7    1.15    0.48
  -7   4   7    0.40    0.77
   7  -4   7    0.36    0.49
   7   4   7    0.38    0.48
   7  -4  -7    0.72    0.56
  -7  -4   7   -0.39    0.86
   8  -4   7    1.35    0.67
   8  -4   7    1.03    0.73
  -8   4   7    0.91    1.10
   8   4  -7    1.77    0.59
   8   4   7    1.40    0.62
   8  -4  -7    1.19    0.67
  -8  -4   7    1.68    1.15
  -9   4   7    4.27    1.37
   9   4  -7    3.48    0.85
   9  -4   7    3.59    0.95
   9   4   7    3.71    0.90
   9  -4  -7    2.85    0.89
   0  -5   7    1.89    0.25
   0   5  -7    1.97    0.26
   0   5  -7    2.34    0.23
   0   5   7    1.94    0.32
   0  -5   7    2.80    0.39
   0  -5  -7    2.02    0.22
   0   5   7    2.25    0.26
   1   5  -7   27.21    1.43
  -1   5   7   26.09    1.48
   1  -5   7   25.97    1.40
  -1   5   7   27.09    1.44
  -1  -5  -7   27.08    1.41
   1  -5   7   26.34    1.54
   1   5  -7   24.63    1.43
  -1  -5  -7   29.87    1.39
  -1  -5   7   27.40    1.53
   1  -5  -7   27.17    1.45
  -1   5  -7   26.65    1.44
  -1  -5   7   25.92    1.49
   1   5   7   26.08    1.52
  -1   5  -7   25.31    1.38
   1   5   7   28.51    1.45
   2  -5   7   16.85    1.15
  -2   5   7   18.77    1.07
   2  -5   7   18.88    1.01
   2   5  -7   18.59    1.06
  -2   5   7   18.47    1.13
  -2  -5   7   21.01    1.18
   2  -5  -7   18.98    1.10
  -2  -5   7   20.43    1.19
   2   5   7   17.97    1.15
  -2   5  -7   20.12    1.10
   3  -5   7    0.99    0.43
  -3   5   7    0.99    0.27
  -3   5   7    0.84    0.38
   3  -5   7    0.77    0.23
   3  -5  -7    1.14    0.31
  -3  -5   7    1.08    0.47
  -3   5  -7    0.57    0.34
   3   5   7    1.20    0.35
  -3  -5   7    0.69    0.36
   4  -5   7    0.29    0.42
   4  -5   7    0.60    0.27
  -4   5   7    0.48    0.31
  -4   5   7    0.60    0.43
  -4  -5   7    0.72    0.51
   4   5   7    0.71    0.38
   4  -5  -7    0.46    0.32
  -4  -5   7    0.33    0.39
   5  -5   7    6.29    0.70
   5  -5   7    7.84    0.59
  -5   5   7    5.69    0.78
   5   5  -7    7.99    0.62
   5  -5  -7    7.11    0.66
   5   5   7    7.07    0.71
  -5  -5   7    4.87    0.93
   6   5  -7    4.08    0.52
   6  -5   7    3.81    0.50
  -6   5   7    3.74    0.85
   6  -5   7    3.20    0.63
  -6  -5   7    3.34    0.88
   6   5   7    2.97    0.55
   6  -5  -7    3.87    0.59
   7   5  -7    6.21    0.70
  -7   5   7    7.73    1.14
   7  -5   7    7.40    0.93
  -7  -5   7    7.26    1.21
   7  -5  -7    6.29    0.78
   7   5   7    7.76    0.84
   8   5  -7    4.68    0.72
   8  -5   7    1.88    0.76
   8   5  -7    3.20    0.67
  -8   5   7    3.18    1.17
  -9   5   7    0.75    1.36
   9   5  -7    0.27    0.71
   9   5   7    0.12    0.82
   0  -6   7   52.07    2.83
   0   6  -7   51.19    2.70
   0   6   7   52.64    2.81
   0   6  -7   54.04    2.76
   0  -6   7   51.69    2.73
   0   6   7   53.62    2.75
   0  -6  -7   53.71    2.73
   1   6  -7   10.73    0.67
   1  -6   7   10.18    0.78
  -1  -6  -7    9.99    0.62
  -1   6   7   10.48    0.72
   1   6  -7   10.93    0.68
  -1  -6  -7   10.28    0.61
  -1   6   7   10.43    0.67
   1   6   7   10.92    0.84
   1  -6  -7   10.48    0.68
   1   6   7   11.51    0.69
  -1   6  -7   10.80    0.69
  -1  -6   7   10.13    0.80
  -1  -6   7   10.21    0.75
   2  -6   7    5.31    0.56
  -2   6   7    5.57    0.53
  -2   6   7    5.30    0.46
   2   6  -7    4.47    0.43
   2   6   7    4.55    0.53
  -2  -6   7    5.83    0.57
  -2  -6   7    5.65    0.58
  -2   6  -7    6.53    0.51
   2  -6  -7    5.42    0.47
   3  -6   7   11.51    0.86
   3  -6   7    9.06    0.59
  -3   6   7    9.21    0.76
  -3   6   7   10.20    0.69
   3   6   7    9.70    0.79
  -3  -6   7    8.49    0.83
  -3  -6   7    8.98    0.78
   3  -6  -7    8.62    0.70
  -3   6  -7    9.38    0.71
  -4   6   7    5.68    0.70
  -4   6   7    6.20    0.57
  -4   6  -7    5.54    0.59
  -4  -6   7    6.27    0.82
  -4  -6   7    6.18    0.67
   4   6   7    5.63    0.63
   4  -6  -7    5.94    0.61
   5   6  -7    2.10    0.41
  -5   6   7    2.85    0.69
   5  -6   7    2.40    0.56
   5  -6  -7    3.73    0.51
  -5  -6   7    3.71    0.81
   5   6   7    2.50    0.53
  -6   6   7    4.09    0.88
   6  -6   7    3.02    0.72
   6   6  -7    6.14    0.58
   6   6   7    3.54    0.63
   6  -6  -7    3.41    0.64
  -6  -6   7    3.31    0.86
   7   6  -7    4.63    0.64
   7  -6   7    5.72    0.87
   7   6  -7    5.08    0.70
  -7   6   7    3.36    1.06
   7  -6  -7    4.83    0.75
   7   6   7    4.99    0.73
  -8   6   7    1.02    1.18
   8   6  -7    1.54    1.08
   8  -6  -7    1.46    0.80
   8   6   7    0.78    0.73
   0   7  -7   11.33    0.61
   0  -7  -7   10.37    0.72
   0  -7   7   11.50    0.88
   0   7   7   12.44    0.76
   0   7  -7   10.67    0.75
   0   7   7   10.77    0.82
   1   7  -7    1.56    0.28
  -1  -7  -7    1.19    0.22
  -1   7   7    1.41    0.30
  -1   7   7    0.94    0.30
   1  -7   7    1.98    0.42
   1   7   7    0.94    0.42
  -1   7  -7    1.73    0.35
   1  -7  -7    1.62    0.31
   1   7   7    1.46    0.30
  -1  -7   7    1.26    0.42
  -1  -7   7    1.97    0.36
  -2   7   7   17.97    1.12
  -2   7   7   18.47    1.07
   2   7  -7   18.23    1.07
   2  -7   7   17.27    1.22
   2  -7  -7   18.30    1.10
  -2   7  -7   17.26    1.08
   2   7   7   19.35    1.22
  -2  -7   7   16.26    1.13
   2   7   7   17.93    1.06
  -2  -7   7   18.58    1.19
   3   7  -7    6.19    0.53
  -3   7   7    7.44    0.58
   3  -7   7    6.80    0.69
  -3   7   7    6.06    0.64
  -3   7  -7    5.97    0.58
   3  -7  -7    6.50    0.62
  -3  -7   7    7.20    0.66
   3   7   7    6.38    0.67
  -3  -7   7    7.64    0.78
  -4   7   7    8.94    0.85
   4  -7   7    7.85    0.85
  -4   7   7   10.33    0.77
   4   7   7    8.50    0.82
  -4  -7   7    9.82    0.86
   4  -7  -7   10.55    0.91
  -4  -7   7    8.72    0.94
  -4   7  -7    9.59    0.79
   5   7  -7    2.05    0.42
   5  -7   7    0.99    0.56
  -5   7   7    2.25    0.44
  -5   7   7    2.18    0.70
   5  -7  -7    1.37    0.48
  -5  -7   7    0.33    0.70
   5   7   7    1.82    0.50
   6   7  -7    0.83    0.44
   6  -7   7   -0.13    0.63
   6   7  -7    0.82    0.44
  -6   7   7    0.24    0.78
   6  -7  -7    0.86    0.59
   6   7   7    0.35    0.52
   7  -7   7    1.95    0.79
  -7   7   7    0.88    1.01
   7   7  -7    2.04    0.63
   7   7   7    1.32    0.68
   7  -7  -7    0.91    0.69
  -8   7   7    1.17    1.22
   8   7  -7    1.05    0.67
   8  -7   7    1.60    0.94
   8  -7  -7    1.36    0.84
   8   7   7    1.45    0.78
   0  -8  -7    7.87    0.57
   0   8  -7    7.85    0.62
   0   8   7    6.68    0.64
   0  -8   7    7.10    0.70
   0   8   7    7.28    0.61
   1   8  -7    6.23    0.57
   1  -8   7    5.65    0.67
  -1   8   7    6.48    0.57
  -1   8   7    8.13    0.62
   1  -8  -7    6.38    0.58
   1   8   7    7.97    0.59
  -1   8  -7    7.84    0.63
  -1  -8   7    6.72    0.68
   1   8   7    8.04    0.70
   2   8  -7    2.12    0.30
  -2   8   7    1.66    0.38
   2  -8   7    1.68    0.49
  -2   8   7    1.29    0.36
   2   8  -7    2.07    0.38
  -2  -8   7    1.41    0.44
  -2   8  -7    1.91    0.39
   2   8   7    1.98    0.48
   2   8   7    2.19    0.35
   2  -8  -7    1.45    0.40
   3   8  -7    4.88    0.47
   3   8  -7    5.18    0.51
   3  -8   7    3.50    0.60
  -3   8   7    4.74    0.49
  -3   8   7    4.07    0.56
  -3  -8   7    3.73    0.57
   3   8   7    5.52    0.65
   3  -8  -7    4.91    0.58
  -4   8   7    0.17    0.51
   4   8  -7    0.63    0.36
   4  -8   7   -0.08    0.48
  -4   8   7   -0.03    0.37
   4  -8  -7    0.60    0.50
  -4   8  -7    0.58    0.43
   4   8   7    0.34    0.49
  -4  -8   7    0.18    0.49
   5   8  -7    7.28    0.70
   5   8  -7    8.56    0.75
   5  -8   7    8.20    0.93
  -5   8   7    9.29    0.79
   5  -8  -7    6.80    0.84
   5   8   7    8.26    0.85
  -6   8   7    2.90    0.93
   6  -8   7    2.37    0.72
   6   8  -7    2.52    0.62
   6  -8  -7    3.19    0.73
   6   8   7    3.80    0.75
   7   8  -7    0.33    0.59
   8   8  -7    0.43    0.76
   8  -8   7    2.35    1.05
   8  -8  -7    0.74    0.84
   8   8   7    0.85    0.77
   0   9   7    2.59    0.42
   0   9  -7    2.37    0.42
   0  -9  -7    1.89    0.39
   0   9   7    2.49    0.39
   0  -9   7    2.47    0.50
   1   9  -7   16.20    1.05
  -1   9   7   14.48    1.03
  -1   9   7   15.36    1.01
  -1  -9   7   16.73    1.15
   1  -9  -7   18.52    1.08
   1   9   7   14.78    1.11
  -1   9  -7   15.79    1.03
   1   9   7   16.22    1.02
   2   9  -7    6.21    0.60
  -2   9   7    7.33    0.69
  -2   9   7    7.08    0.63
   2  -9   7    7.10    0.74
   2  -9  -7    7.21    0.68
  -2   9  -7    4.79    0.65
   2   9   7    6.06    0.71
   2   9   7    7.06    0.62
  -2  -9   7    8.04    0.73
  -3   9   7    2.87    0.55
  -3   9   7    3.64    0.50
   3   9  -7    3.11    0.42
   3   9  -7    3.42    0.52
   3  -9   7    4.03    0.66
   3   9   7    3.13    0.46
  -3   9  -7    2.74    0.49
   3  -9  -7    3.50    0.66
   3   9   7    2.24    0.53
  -3  -9   7    4.11    0.61
  -4   9   7    1.26    0.62
   4   9  -7    1.06    0.41
  -4   9   7    1.13    0.46
   4  -9   7    2.48    0.68
   4   9  -7    1.20    0.45
  -4   9  -7    0.97    0.52
   4  -9  -7    1.04    0.57
  -4  -9   7    1.00    0.57
   4   9   7    0.99    0.57
   5  -9   7    1.45    0.70
   5   9  -7    1.62    0.84
   5   9  -7    1.63    0.51
  -5   9   7    1.37    0.54
   5   9  -7    1.69    0.49
  -5   9  -7    1.39    0.59
   5   9   7    1.56    0.64
   5  -9  -7    2.00    0.68
   6   9  -7    3.08    0.65
   6  -9   7    3.32    0.80
   6   9   7    1.45    0.72
   6  -9  -7    0.44    0.66
   7   9  -7    4.78    0.82
   7  -9   7    2.91    0.96
   7   9   7    5.69    0.97
   7  -9  -7    3.59    0.90
   0  10   7    1.22    0.41
   0  10   7    1.99    0.41
   0 -10   7    1.40    0.53
   0  10  -7    1.45    0.42
   1 -10   7    0.20    0.46
  -1  10   7    0.39    0.34
   1  10  -7    0.23    0.39
  -1  10   7   -0.73    0.36
   1  10   7    0.15    0.34
   1  10   7    0.09    0.43
  -1  10  -7   -0.13    0.37
   1 -10  -7   -0.03    0.44
   2  10  -7    3.77    0.51
   2 -10   7    4.21    0.64
  -2  10   7    4.27    0.52
  -2  10   7    4.14    0.55
   2  10   7    3.67    0.51
   2  10   7    3.79    0.72
  -2 -10   7    4.99    0.76
  -2  10  -7    3.18    0.56
   2 -10  -7    4.81    0.63
   3 -10   7    5.25    0.73
   3  10  -7    5.80    0.61
  -3  10   7    5.25    0.64
   3 -10  -7    4.75    0.72
   3  10   7    5.92    0.76
   3  10   7    6.57    0.67
  -3  10  -7    7.63    0.71
   4  10  -7    1.91    0.52
  -4  10   7    2.22    0.50
   4 -10   7    1.09    0.69
   4  10   7    2.09    0.65
   4 -10  -7    2.58    0.66
   4  10   7    1.80    0.46
  -4 -10   7    2.06    0.63
  -4  10  -7    1.51    0.58
  -5  10   7    4.68    0.70
   5 -10   7    3.87    0.85
   5  10  -7    4.95    0.65
   5  10   7    3.01    0.77
  -5  10  -7    4.46    0.75
   5 -10  -7    3.27    0.78
   6 -10   7    0.85    0.84
  -6  10   7    0.21    0.64
   6  10  -7    0.78    0.97
   6  10  -7    1.14    0.59
   6 -10  -7   -0.29    0.78
   6  10   7   -0.23    0.74
   7 -10   7    0.02    0.87
   7  10   7   -0.39    0.75
   7 -10  -7   -0.52    0.84
   0  11   7    0.27    0.40
   0  11   7    0.02    0.43
   0  11  -7   -0.19    0.46
   0 -11   7    0.13    0.47
   1 -11   7    1.18    0.54
  -1  11   7    1.11    0.44
   1  11  -7    1.38    0.51
  -1  11  -7    1.25    0.48
  -1 -11   7    1.42    0.59
   1  11   7    1.55    0.50
   1  11   7    1.71    0.46
  -2  11   7    2.24    0.48
   2  11  -7    1.70    0.51
   2 -11   7    1.47    0.64
  -2 -11   7    1.97    0.61
   2 -11  -7    1.59    0.61
   2  11   7    1.57    0.60
  -2  11  -7    2.67    0.57
   2  11   7    2.24    0.48
  -3  11   7    0.27    0.41
   3 -11   7   -0.52    0.56
   3  11  -7   -0.54    0.46
  -3  11  -7   -0.56    0.51
  -3 -11   7    0.18    0.59
   3  11   7    0.17    0.64
   3 -11  -7   -0.18    0.62
   3  11   7    0.08    0.44
  -4  11   7    5.82    0.73
   4 -11   7    4.22    0.87
   4  11  -7    5.06    0.67
   4  11   7    7.19    0.76
   4  11   7    6.19    0.89
  -4  11  -7    5.15    0.77
   4 -11  -7    4.88    0.87
  -5  11   7   -0.59    0.59
   5  11  -7    0.23    0.53
   5  11   7   -1.19    0.72
   5 -11  -7   -0.50    0.76
  -5  11  -7   -0.35    0.58
   5  11   7    1.47    0.93
   6 -11   7   -0.85    0.81
  -6  11   7    1.17    0.72
   6 -11  -7   -1.21    0.86
   6  11   7   -0.43    0.73
   0  12   7    3.95    0.62
   0  12  -7    2.18    0.55
   0 -12   7    3.41    0.67
   1  12  -7    6.60    0.76
  -1  12   7    5.90    0.70
   1 -12   7    7.80    0.88
  -1  12  -7    8.77    0.81
   1  12   7    5.20    0.72
  -1 -12   7    5.45    0.80
  -2  12   7    2.18    0.60
   2  12  -7    2.52    0.62
   2 -12   7    2.39    0.74
   2  12   7    1.75    0.64
  -2  12  -7    1.62    0.56
  -2 -12   7    1.68    0.66
   2  12   7    2.52    0.59
   3 -12   7    0.14    0.73
  -3  12   7   -0.08    0.53
   3  12  -7    0.63    0.50
   3 -12  -7    0.06    0.73
   3  12   7    0.11    0.53
  -3  12  -7   -0.42    0.52
   3  12   7   -0.02    0.69
  -4  12   7    0.33    0.55
   4  12  -7    1.28    0.60
   4 -12   7    1.33    0.88
  -4  12  -7   -0.34    0.66
   4  12   7    0.63    0.78
   4 -12  -7    0.20    0.80
   5 -12   7    4.20    0.97
  -5  12   7    4.48    0.76
   5  12   7    5.79    0.84
   5  12   7    3.04    0.90
  -5  12  -7    4.30    0.88
   0 -13   7    3.60    0.76
   0  13   7    2.91    0.62
   0  13  -7    2.16    0.61
   1  13  -7    4.26    0.75
  -1  13   7    5.28    0.73
   1 -13   7    7.40    0.95
  -1  13  -7    4.57    0.78
   1  13   7    7.40    0.83
  -1 -13   7    6.22    0.88
   2  13  -7    0.70    0.63
  -2  13   7    0.93    0.63
   2 -13   7    0.95    0.69
  -2  13  -7    1.02    0.59
   2  13   7    1.12    0.63
   3  13  -7    2.89    0.72
  -3  13   7    3.07    0.75
   3  13   7    3.33    0.69
   4  13  -7    3.10    0.77
  -4  13   7    3.53    0.71
   4 -13   7    4.58    1.02
   4  13   7    1.75    0.73
  -4  13  -7    2.58    0.75
   4 -13  -7    3.20    1.00
   0  14   7    4.04    0.73
   0 -14   7    3.28    0.83
   1 -14   7    0.64    0.79
  -1  14   7    0.70    0.66
   1  14  -7   -0.47    1.05
   1  14   7    0.72    0.62
  -1  14  -7    0.11    0.69
  -2  14   7    2.12    0.69
   2  14  -7    1.89    0.77
   2 -14   7    2.89    1.02
   2  14   7    2.46    0.76
  -2  14  -7    2.58    0.78
   3  14  -7    0.87    0.77
  -3  14   7    0.30    0.68
   3 -14   7    1.06    0.96
  -3  14  -7   -0.11    0.68
   3  14   7    0.60    0.65
   0   0   8   63.07    3.03
   0   0   8   57.48    2.89
   0   0   8   57.00    2.97
   0   0  -8   56.22    3.01
   0   0  -8   53.16    2.98
  -1   0   8   -0.06    0.19
  -1   0   8    0.44    0.23
   1   0   8    0.09    0.20
  -1   0  -8    0.26    0.20
   1   0   8    0.37    0.24
  -2   0   8   43.06    2.36
  -2   0  -8   41.29    2.30
   2   0   8   44.72    2.31
   2   0   8   44.25    2.33
   2   0  -8   44.01    2.23
  -2   0   8   45.01    2.35
   3   0   8    6.04    0.49
  -3   0   8    5.21    0.56
   3   0   8    4.88    0.43
   3   0  -8    4.17    0.40
   4   0   8    3.69    0.41
  -4   0   8    3.62    0.61
   4   0   8    3.49    0.40
   4   0  -8    2.60    0.35
   5   0  -8    0.54    0.32
  -5   0   8    1.54    0.57
   5   0   8    0.77    0.38
   5   0   8    0.63    0.35
   6   0   8    7.13    0.67
  -6   0   8    6.37    0.97
   6   0   8    8.44    0.72
   6   0  -8    6.20    0.63
   7   0   8    1.19    0.52
   7   0   8    1.70    0.55
   7   0  -8    0.48    0.45
  -7   0   8    2.08    0.88
   8   0  -8    4.95    0.74
  -8   0   8    5.46    1.21
   8   0   8    4.98    0.72
   9   0   8    0.33    0.75
  -9   0   8    0.97    1.15
   9   0  -8    0.34    0.74
   0  -1   8   19.93    1.02
   0   1   8   19.77    1.02
   0  -1   8   20.44    1.13
   0   1  -8   18.99    1.13
   0   1   8   19.85    1.12
   0   1   8   19.62    1.12
   0  -1  -8   19.21    1.11
   0  -1   8   20.73    1.09
  -1  -1  -8    0.24    0.20
  -1   1   8    0.12    0.18
   1  -1   8    0.24    0.11
   1  -1   8    0.16    0.22
  -1   1   8    0.50    0.24
   1  -1   8   -0.26    0.20
   1   1   8    0.40    0.24
  -1   1  -8    0.09    0.21
   1   1   8    0.18    0.17
  -1  -1   8    0.17    0.25
  -1  -1   8    0.03    0.18
  -1   1  -8    0.17    0.26
   2  -1   8    6.51    0.54
   2  -1   8    6.73    0.46
   2  -1   8    6.68    0.54
  -2  -1  -8    6.52    0.51
  -2   1   8    6.67    0.55
   2   1   8    6.98    0.55
  -2  -1   8    7.77    0.61
   2  -1  -8    6.98    0.47
  -2  -1   8    6.67    0.57
   2  -1  -8    6.50    0.40
   2   1   8    6.83    0.48
  -3   1   8   11.23    0.84
   3  -1   8    9.65    0.71
   3   1  -8   11.53    0.69
  -3  -1  -8   10.13    0.71
   3  -1   8   10.60    0.72
   3  -1  -8    9.93    0.64
  -3  -1   8   10.95    0.85
   3  -1  -8   10.20    0.67
   3   1   8   11.10    0.73
   3   1   8   10.11    0.67
   4  -1   8   12.04    0.79
  -4   1   8   12.15    0.97
   4   1  -8   11.22    0.74
   4  -1   8   10.51    0.80
   4  -1  -8   10.63    0.74
  -4  -1   8   10.73    0.94
   4   1   8   10.77    0.76
   4   1   8   11.35    0.81
  -5   1   8   15.08    1.22
   5   1  -8   15.48    1.00
   5  -1   8   15.21    1.01
   5  -1   8   14.43    1.07
   5   1   8   14.46    0.99
  -5  -1   8   15.25    1.25
   5  -1  -8   17.06    1.02
   5   1   8   15.03    1.04
   6   1  -8    8.96    0.76
  -6   1   8    8.53    1.05
   6  -1   8    8.86    0.82
   6  -1   8    7.74    0.76
   6  -1  -8    8.03    0.72
   6   1   8   10.17    0.81
   6   1   8    9.47    0.75
  -6  -1   8   10.33    1.08
   7  -1   8    1.20    0.52
   7   1  -8    1.42    0.46
  -7   1   8    1.27    0.79
   7  -1   8    1.17    0.56
  -7  -1   8    2.39    0.83
   7   1   8    1.81    0.55
   7  -1  -8    1.61    0.51
   8   1  -8   -0.21    0.48
   8  -1   8   -0.22    0.58
  -8   1   8    1.53    1.07
   8  -1   8    0.52    0.66
   8   1   8   -0.03    0.54
   8  -1  -8    0.03    0.56
  -8  -1   8   -0.98    0.91
  -9   1   8   -0.70    1.25
   9   1  -8    0.24    0.80
   9   1   8    1.15    0.78
   9  -1  -8   -0.05    0.73
  -9  -1   8   -0.15    1.12
   0   2   8    0.67    0.11
   0  -2  -8    0.42    0.21
   0   2  -8    0.67    0.12
   0  -2   8    0.55    0.10
   0   2   8    0.77    0.22
   0  -2   8    0.66    0.18
   0   2   8    0.41    0.25
   0  -2   8    0.68    0.24
   0   2  -8    0.84    0.25
  -1  -2  -8    6.32    0.48
  -1   2   8    6.62    0.51
   1   2  -8    7.29    0.40
   1  -2   8    7.26    0.56
   1   2  -8    6.85    0.52
  -1   2   8    6.69    0.40
   1  -2   8    7.50    0.49
  -1   2  -8    6.81    0.51
   1  -2  -8    6.76    0.47
  -1  -2   8    7.92    0.58
   1   2   8    7.12    0.48
  -1  -2   8    6.83    0.51
   1   2   8    8.06    0.61
  -2   2   8   18.28    0.99
   2  -2   8   16.65    0.97
  -2   2   8   15.69    0.85
   2  -2   8   17.01    0.97
  -2  -2  -8   15.89    0.88
   2  -2   8   15.50    0.88
   2   2   8   15.25    0.87
   2   2   8   14.10    0.95
   2  -2  -8   14.78    0.91
   2  -2  -8   14.75    0.84
  -2  -2   8   15.54    1.00
  -2  -2   8   16.63    0.99
  -2   2  -8   15.08    0.90
   3  -2   8   22.48    1.21
  -3  -2  -8   20.61    1.17
  -3   2   8   20.46    1.31
   3  -2   8   21.19    1.26
   3   2   8   22.05    1.25
  -3  -2   8   21.01    1.30
   3   2   8   21.93    1.16
   3  -2  -8   19.98    1.15
   3  -2  -8   20.26    1.21
  -3  -2   8   21.83    1.33
   4  -2   8    6.32    0.51
   4   2  -8    6.31    0.50
  -4   2   8    6.13    0.67
   4  -2   8    5.74    0.57
   4   2   8    5.35    0.44
   4  -2  -8    5.47    0.51
  -4  -2   8    4.88    0.68
   4   2   8    4.63    0.51
   5  -2   8   13.45    0.87
   5  -2   8   13.44    0.97
   5   2  -8   11.68    0.82
  -5   2   8   10.95    1.06
   5   2   8   11.62    0.80
   5  -2  -8   11.63    0.83
  -5  -2   8   11.25    1.11
   5   2   8   12.07    0.92
   6   2  -8    0.38    0.35
   6  -2   8    0.23    0.43
  -6   2   8    0.64    0.69
   6  -2   8   -0.03    0.38
   6  -2  -8    0.16    0.35
   6   2   8    0.12    0.38
  -6  -2   8    0.57    0.64
   7  -2   8   -0.56    0.44
   7   2  -8    0.11    0.40
  -7   2   8   -0.42    0.74
   7  -2   8   -0.60    0.54
   7   2   8   -0.09    0.50
  -7  -2   8    0.44    0.86
   7  -2  -8   -0.15    0.46
   8  -2   8    1.77    0.62
  -8   2   8    3.84    1.08
   8   2  -8    2.16    0.59
   8  -2   8    2.10    0.75
   8   2   8    2.09    0.69
   8  -2  -8    2.89    0.65
  -8  -2   8    1.38    1.01
   9  -2   8   -0.24    0.71
  -9   2   8    0.07    1.16
  -9  -2   8   -0.74    1.25
   9   2   8    0.13    0.76
   9  -2  -8   -0.49    0.75
   0   3  -8   27.20    1.41
   0   3  -8   24.75    1.45
   0  -3   8   26.40    1.44
   0  -3   8   27.63    1.50
   0  -3  -8   27.75    1.46
   0   3   8   28.38    1.51
   0   3   8   27.01    1.41
   0  -3  -8   26.87    1.43
   1  -3   8   21.20    1.22
  -1   3   8   20.95    1.10
   1   3  -8   20.55    1.10
  -1   3   8   19.29    1.17
   1  -3   8   21.18    1.12
   1  -3   8   21.12    1.13
  -1  -3  -8   20.60    1.13
   1   3  -8   20.18    1.15
  -1  -3   8   20.03    1.20
  -1   3  -8   21.44    1.13
   1  -3  -8   21.77    1.14
   1   3   8   21.37    1.24
   2  -3   8   25.27    1.41
  -2   3   8   24.48    1.42
   2  -3   8   26.57    1.36
  -2   3   8   25.29    1.32
  -2  -3  -8   25.20    1.32
  -2   3  -8   24.59    1.34
   2  -3  -8   23.69    1.32
  -2  -3   8   25.15    1.44
   2  -3  -8   24.28    1.36
   2   3   8   24.71    1.43
   2   3   8   24.73    1.31
  -2  -3   8   23.83    1.45
   3  -3   8    0.47    0.32
   3  -3   8    1.03    0.26
  -3   3   8    0.61    0.34
  -3  -3  -8    0.96    0.19
   3  -3  -8    0.78    0.24
   3   3   8    1.17    0.19
   3   3   8    0.43    0.30
  -3  -3   8    1.77    0.42
  -3  -3   8    0.90    0.42
  -4   3   8    1.99    0.48
   4  -3   8    1.44    0.32
   4   3  -8    1.45    0.30
   4  -3   8    0.92    0.38
   4  -3  -8    0.85    0.28
  -4  -3   8    0.48    0.54
   4   3   8    1.67    0.37
   4   3   8    1.54    0.25
   5  -3   8    9.41    0.82
   5  -3   8    9.24    0.74
   5   3  -8    9.09    0.72
  -5   3   8    8.07    0.89
  -5  -3   8    7.92    0.94
  -6   3   8    4.18    0.82
   6  -3   8    7.25    0.64
   6  -3   8    6.64    0.74
   6   3  -8    5.66    0.61
  -6  -3   8    6.00    0.91
   6  -3  -8    5.73    0.65
   6   3   8    5.90    0.69
   7  -3   8    2.41    0.63
  -7   3   8    2.91    0.96
   7  -3   8    2.85    0.56
   7   3  -8    2.69    0.54
  -7  -3   8    2.65    0.97
   7   3   8    2.53    0.62
   7  -3  -8    1.98    0.54
   8  -3   8    2.53    0.76
   8  -3   8    2.66    0.68
   8   3  -8    2.50    0.62
  -8   3   8    2.92    1.04
  -8  -3   8    2.83    1.04
   8  -3  -8    2.05    0.70
   8   3   8    1.43    0.68
   9  -3   8    2.14    1.31
  -9   3   8    4.97    1.47
   9  -3   8    2.29    0.94
  -9  -3   8    2.73    1.41
   9  -3  -8    1.66    0.78
   9   3   8    2.38    0.86
   0  -4  -8    1.36    0.19
   0  -4   8    1.31    0.30
   0  -4   8    1.09    0.22
   0  -4   8    1.43    0.19
   0   4  -8    0.64    0.18
   0   4   8    1.34    0.19
   0   4   8    1.11    0.28
  -1  -4  -8   10.89    0.55
  -1   4   8   10.51    0.59
  -1  -4  -8   11.93    0.61
   1   4  -8    9.53    0.57
   1  -4   8    9.14    0.73
   1  -4   8    8.40    0.59
   1  -4   8    9.42    0.57
  -1   4   8    8.25    0.64
   1   4  -8    8.68    0.61
  -1   4  -8    8.48    0.59
   1   4   8   10.97    0.73
   1  -4  -8    9.38    0.60
  -1  -4   8    9.99    0.73
  -1  -4   8    8.98    0.67
   2  -4   8    9.97    0.60
   2   4  -8    9.80    0.57
  -2  -4  -8    8.70    0.54
   2  -4   8    9.64    0.71
  -2   4   8    9.92    0.68
  -2  -4  -8    9.63    0.51
  -2   4   8    9.42    0.59
   2  -4  -8    8.28    0.61
   2   4   8   10.20    0.73
  -2  -4   8    8.06    0.72
  -2  -4   8    9.43    0.76
   2  -4  -8    9.50    0.63
  -2   4  -8    9.37    0.64
  -3   4   8    2.59    0.31
  -3   4   8    1.59    0.39
   3  -4   8    1.90    0.44
   3  -4   8    2.17    0.30
  -3  -4   8    1.10    0.39
   3  -4  -8    2.14    0.31
  -3  -4   8    2.93    0.53
   3   4   8    1.94    0.39
  -3   4  -8    1.96    0.31
   4  -4   8   15.82    0.97
   4   4  -8   16.71    1.00
  -4   4   8   15.60    1.14
   4  -4   8   13.77    1.12
   4   4   8   16.20    1.06
   4  -4  -8   16.35    1.02
  -4  -4   8   14.52    1.19
   5   4  -8    6.35    0.59
  -5   4   8    7.37    0.87
   5  -4   8    7.44    0.59
   5  -4   8    6.29    0.71
   5  -4  -8    5.92    0.61
   5   4   8    6.35    0.66
   6  -4   8    2.09    0.45
  -6   4   8    4.03    0.84
   6  -4   8    2.24    0.55
   6   4  -8    2.85    0.48
   6  -4  -8    2.48    0.52
   6   4   8    3.05    0.54
  -6  -4   8    2.26    0.84
   7  -4   8    0.41    0.62
   7  -4   8    0.02    0.48
   7   4  -8   -0.10    0.44
  -7   4   8    1.49    0.92
   7  -4  -8    0.29    0.53
   7   4   8    0.26    0.50
  -7  -4   8    0.53    0.95
   8  -4   8    3.02    0.84
  -8   4   8    1.89    1.15
   8   4  -8    1.65    0.62
   8   4   8    2.32    0.74
   8  -4  -8    2.59    0.82
  -8  -4   8    3.46    1.13
   9  -4   8    0.43    0.91
  -9   4   8   -0.01    1.34
   9   4  -8    0.81    0.70
   9  -4  -8    0.16    0.76
   9   4   8   -0.77    0.78
   0   5  -8    3.57    0.34
   0   5   8    4.07    0.45
   0   5   8    4.73    0.36
   0  -5   8    4.20    0.45
   0  -5   8    4.59    0.38
   0  -5  -8    4.15    0.33
   0   5  -8    4.04    0.35
   1   5  -8    9.91    0.63
  -1  -5  -8   11.61    0.63
   1  -5   8    9.22    0.59
  -1  -5  -8   12.29    0.58
   1  -5   8    9.14    0.76
  -1   5   8    9.19    0.71
   1   5  -8    9.70    0.65
  -1   5   8    9.76    0.64
  -1   5  -8    9.31    0.59
   1  -5  -8    9.53    0.64
  -1  -5   8   10.11    0.74
   1   5   8    9.71    0.63
   1   5   8   12.12    0.83
  -1   5  -8   10.16    0.66
  -1  -5   8   10.40    0.76
  -2   5   8    4.00    0.36
   2   5  -8    4.44    0.36
   2  -5   8    4.27    0.34
   2  -5   8    4.02    0.53
  -2   5   8    3.11    0.41
  -2  -5   8    4.24    0.48
  -2  -5   8    3.73    0.52
  -2   5  -8    5.17    0.43
  -2   5  -8    4.19    0.31
   2   5   8    4.28    0.50
   2  -5  -8    3.55    0.38
   3  -5   8   21.59    1.23
  -3   5   8   21.23    1.35
  -3   5   8   23.95    1.26
   3  -5   8   23.17    1.41
  -3  -5   8   21.96    1.44
   3  -5  -8   22.00    1.30
   3   5   8   20.49    1.38
  -3   5  -8   22.69    1.31
  -3  -5   8   22.76    1.40
   4  -5   8   14.85    1.05
  -4   5   8   15.88    1.14
  -4   5   8   14.58    0.92
   4  -5   8   13.46    0.89
   4  -5  -8   14.06    0.94
  -4  -5   8   12.34    1.09
  -4  -5   8   13.41    1.06
   4   5   8   13.96    1.04
   5  -5   8    0.06    0.34
   5   5  -8    0.36    0.31
   5  -5   8    0.04    0.50
  -5  -5   8    0.69    0.68
   5  -5  -8    0.37    0.37
   5   5   8    0.12    0.39
   6  -5   8    3.74    0.69
  -6   5   8    2.74    0.75
   6   5  -8    1.73    0.43
   6  -5  -8    2.16    0.50
   6   5   8    2.76    0.59
  -6  -5   8    1.37    0.77
   7   5  -8    0.14    0.46
   7  -5   8   -0.11    0.59
  -7   5   8   -0.76    0.90
   7  -5  -8    0.38    0.58
  -7  -5   8   -0.10    0.97
   7   5   8   -0.12    0.49
   8   5  -8    2.12    0.65
   8  -5   8    2.75    0.85
  -8   5   8    1.67    1.15
   8  -5  -8    1.08    0.73
   8   5   8    1.10    0.72
  -8  -5   8    1.73    2.14
   0  -6   8    0.38    0.24
   0   6  -8    0.18    0.25
   0   6   8    0.30    0.32
   0  -6  -8    0.00    0.19
   0  -6  -8    0.19    0.29
   0   6   8    0.64    0.24
   0  -6   8   -0.13    0.34
   1   6  -8   13.07    0.76
  -1   6   8   12.85    0.76
  -1  -6  -8   12.16    0.69
   1  -6   8   12.07    0.69
  -1   6   8   13.63    0.84
   1  -6   8   12.26    0.92
  -1  -6   8   12.36    0.85
  -1   6  -8   11.20    0.78
   1  -6  -8   11.36    0.77
   1   6   8   11.29    0.93
   1   6   8   11.55    0.74
  -1  -6   8   11.79    0.91
   2  -6   8    1.89    0.44
  -2   6   8    2.71    0.38
   2  -6   8    2.63    0.21
  -2   6   8    2.62    0.33
   2   6  -8    2.63    0.32
  -2  -6   8    3.47    0.49
  -2  -6   8    3.13    0.49
  -2   6  -8    2.73    0.38
   2   6   8    2.57    0.46
   2  -6  -8    2.88    0.37
  -3   6   8    4.68    0.44
   3  -6   8    4.52    0.62
  -3   6   8    5.11    0.59
   3   6  -8    4.02    0.42
   3   6   8    4.29    0.55
   3  -6  -8    4.80    0.49
  -3  -6   8    5.72    0.68
  -3  -6   8    3.96    0.57
  -3   6  -8    4.71    0.50
  -4   6   8    3.95    0.47
  -4   6   8    5.38    0.67
   4  -6   8    5.05    0.62
  -4  -6   8    3.62    0.74
   4   6   8    3.98    0.56
  -4  -6   8    4.15    0.61
   4  -6  -8    4.74    0.56
  -5   6   8    1.22    0.71
   5   6  -8    2.09    0.42
   5  -6   8    0.73    0.56
   5  -6  -8    1.40    0.45
  -5  -6   8    2.03    0.76
   5   6   8    1.69    0.50
   6   6  -8    3.90    0.55
   6  -6   8    5.14    0.75
  -6   6   8    4.34    0.89
  -6  -6   8    2.91    0.94
   6   6   8    3.50    0.63
   6  -6  -8    4.44    0.64
   7  -6   8    2.05    0.80
   7   6  -8    1.87    0.56
  -7   6   8    2.33    0.92
   7  -6  -8    1.10    0.66
   7   6   8    2.73    0.68
  -7  -6   8   -0.09    1.01
  -8   6   8    2.69    1.25
   8  -6   8    3.11    0.98
   8   6  -8    4.30    0.80
   8   6   8    2.90    0.76
   8  -6  -8    4.28    0.90
   0  -7   8   32.97    1.77
   0  -7  -8   33.78    1.82
   0   7  -8   33.98    1.82
   0   7   8   33.11    1.88
   0   7   8   32.72    1.81
   0  -7   8   33.00    1.92
   1  -7   8    1.35    0.44
   1   7  -8    1.79    0.34
  -1   7   8    2.05    0.38
  -1   7   8    1.80    0.32
  -1  -7  -8    1.72    0.24
   1   7   8    2.20    0.49
  -1   7  -8    1.81    0.36
  -1  -7   8    2.13    0.40
   1  -7  -8    1.64    0.32
  -1  -7   8    1.43    0.41
   1   7   8    2.06    0.31
   2   7  -8    1.08    0.30
  -2   7   8    1.35    0.33
  -2   7   8    1.07    0.34
   2  -7   8    1.30    0.45
   2  -7  -8    0.98    0.34
  -2   7  -8    1.36    0.37
   2   7   8    1.85    0.45
  -2  -7   8    1.24    0.45
  -2  -7   8    0.81    0.38
   2   7   8    0.71    0.27
  -3   7   8    1.75    0.34
  -3   7   8    0.97    0.41
   3   7  -8    0.87    0.30
   3  -7   8    1.29    0.50
  -3  -7   8    0.96    0.44
   3  -7  -8    1.51    0.41
  -3   7  -8    1.21    0.41
   3   7   8    1.93    0.51
  -3  -7   8    2.08    0.56
  -4   7   8    0.45    0.46
   4  -7   8    0.79    0.49
  -4   7   8    0.24    0.34
   4  -7  -8    0.54    0.38
   4   7   8    0.81    0.50
  -4  -7   8    0.77    0.61
  -4   7  -8    0.96    0.44
  -4  -7   8   -0.16    0.48
   5   7  -8    7.19    0.71
  -5   7   8    8.11    0.72
  -5   7   8    6.55    0.89
   5  -7   8    6.22    0.83
   5  -7  -8    7.29    0.74
   5   7   8    6.57    0.75
  -5  -7   8    7.72    0.95
   6  -7   8    6.48    0.89
   6   7  -8    7.41    0.71
  -6   7   8    6.72    1.04
   6  -7  -8    7.02    0.85
   6   7   8    8.19    0.90
  -6  -7   8    7.12    1.15
  -7   7   8    0.64    1.00
   7  -7   8    0.97    0.72
   7   7  -8    0.64    0.61
   7  -7  -8    0.25    0.70
   7   7   8    0.90    0.70
   8  -7   8    1.53    0.93
   8   7  -8    1.98    0.79
  -8   7   8    2.17    1.25
   8  -7  -8    0.64    0.87
   8   7   8    0.59    0.81
   0   8   8    2.65    0.39
   0  -8   8    2.38    0.51
   0   8   8    1.98    0.42
   0   8  -8    3.29    0.43
   0  -8  -8    2.57    0.37
   1   8  -8    2.62    0.40
   1  -8   8    1.66    0.50
  -1   8   8    3.14    0.41
  -1   8   8    2.71    0.41
  -1  -8   8    3.06    0.53
   1   8   8    2.99    0.54
  -1   8  -8    2.27    0.40
   1   8   8    3.01    0.40
   1  -8  -8    2.68    0.40
  -2   8   8   17.53    1.06
  -2   8   8   16.97    1.09
   2  -8   8   16.36    1.15
   2   8  -8   17.53    1.04
   2   8   8   15.88    1.04
  -2   8  -8   16.21    1.07
  -2  -8   8   16.85    1.17
   2  -8  -8   16.41    1.08
   2   8   8   14.46    1.19
   3  -8   8   14.51    1.03
  -3   8   8   12.22    0.88
  -3   8   8   12.08    0.98
   3   8  -8   13.07    0.87
   3  -8  -8   12.32    0.95
  -3  -8   8   12.66    1.05
  -3  -8   8   11.98    0.98
   3   8   8   13.00    0.99
  -3   8  -8    9.62    1.09
   4   8  -8   14.13    0.97
   4  -8   8   11.94    1.06
  -4   8   8   12.52    1.09
   4   8  -8   14.05    1.00
  -4   8   8   12.75    0.96
   4  -8  -8   10.74    0.98
  -4   8  -8   17.50    1.08
  -4  -8   8   13.41    1.18
   4   8   8   13.93    1.10
   5  -8   8    3.92    0.78
   5   8  -8    5.14    0.59
  -5   8   8    4.26    0.83
   5   8  -8    4.00    0.54
  -5   8   8    3.91    0.58
   5   8   8    2.53    0.66
   5  -8  -8    4.26    0.68
   6   8  -8    6.05    0.69
   6  -8   8    5.85    0.88
  -6   8   8    4.78    1.00
   6   8  -8    5.62    0.73
   6  -8  -8    5.67    0.87
   6   8   8    6.30    0.85
   7  -8   8    1.68    0.81
   7   8  -8    2.21    0.65
   7   8   8    2.43    0.75
   7  -8  -8    2.32    0.85
   0   9  -8   15.19    1.04
   0   9   8   16.41    1.01
   0   9   8   15.25    1.06
   1   9  -8    6.12    0.58
  -1   9   8    7.94    0.62
   1  -9   8    6.16    0.73
  -1   9   8    6.76    0.60
  -1  -9   8    6.83    0.72
   1   9   8    5.37    0.66
  -1   9  -8    6.48    0.60
   1  -9  -8    6.82    0.62
   2   9  -8    1.82    0.42
  -2   9   8    3.22    0.48
   2  -9   8    1.95    0.59
  -2   9  -8    2.60    0.49
   2   9   8    2.01    0.54
   2   9   8    2.71    0.45
   2  -9  -8    1.41    0.47
  -2  -9   8    2.97    0.56
   3  -9   8   20.28    1.38
  -3   9   8   22.46    1.25
   3   9  -8   17.43    1.29
  -3   9   8   19.48    1.33
  -3   9  -8   18.79    1.24
   3   9   8   17.84    1.34
   3   9   8   20.12    1.22
   3  -9  -8   19.66    1.40
   4   9  -8    3.56    0.52
   4   9  -8    4.00    0.54
   4  -9   8    2.78    0.71
  -4   9   8    4.22    0.56
  -4   9   8    2.77    0.74
  -4  -9   8    3.23    0.67
   4  -9  -8    2.47    0.62
  -4   9  -8    3.70    0.63
   4   9   8    2.83    0.68
  -5   9   8    0.86    0.79
   5   9  -8    1.05    0.48
   5   9  -8    2.38    0.53
  -5   9   8    0.84    0.51
   5  -9   8    0.82    0.70
   5   9  -8    1.31    0.51
   5   9   8   -0.10    0.60
   5  -9  -8    0.00    0.62
  -5   9  -8    1.56    0.55
   6   9  -8    1.65    0.62
   6  -9   8    2.29    0.77
   6  -9  -8    1.88    0.77
   6   9   8    1.40    0.76
   7   9  -8    0.02    0.66
   7  -9   8    0.95    0.93
   7  -9  -8   -0.32    0.86
   7   9   8   -0.65    0.79
   0  10   8   11.17    0.90
   0  10   8   10.27    0.81
   0  10  -8   10.87    0.83
   0 -10   8    9.70    0.92
   1  10  -8    9.32    0.74
  -1  10   8    6.32    0.63
   1 -10   8    7.38    0.83
  -1  10   8    7.49    0.69
  -1 -10   8    7.07    0.74
  -1  10  -8    7.32    0.70
   1 -10  -8    8.46    0.82
   1  10   8    6.85    0.65
   1  10   8    7.24    0.73
   2 -10   8   -0.17    0.55
  -2  10   8    0.11    0.43
   2  10  -8    0.42    0.40
  -2  10   8    0.23    0.37
  -2  10  -8    0.37    0.42
   2 -10  -8    0.78    0.51
   2  10   8    0.23    0.55
   2  10   8    0.29    0.36
  -2 -10   8    0.46    0.51
  -3  10   8    0.15    0.52
  -3  10   8   -0.58    0.40
   3 -10   8    0.57    0.62
   3  10  -8   -0.15    0.38
   3  10   8   -0.01    0.39
  -3  10  -8    0.38    0.48
   3  10   8   -0.26    0.57
   3 -10  -8   -0.25    0.54
  -3 -10   8    0.75    0.53
  -4  10   8    2.94    0.56
   4 -10   8    3.13    0.74
   4  10  -8    3.70    0.57
   4 -10  -8    3.17    0.69
   4  10   8    4.03    0.56
  -4  10  -8    3.42    0.66
   4  10   8    2.81    0.66
  -4 -10   8    3.67    0.72
   5 -10   8    0.95    0.78
   5  10  -8    3.04    0.62
  -5  10   8    2.62    0.65
   5  10   8    1.12    0.73
  -5  10  -8    1.83    0.63
   5 -10  -8    1.53    0.79
  -6  10   8    1.57    0.63
   6  10  -8    3.15    0.69
   6 -10   8    2.69    0.91
   0  11  -8    7.30    0.68
   0  11   8    7.70    0.68
   0 -11   8    4.19    0.72
   0  11   8    6.12    0.65
  -1  11   8    5.14    0.61
   1  11  -8    5.19    0.62
   1 -11   8    6.14    0.80
  -1  11   8    5.81    0.63
  -1 -11   8    6.65    0.78
  -1  11  -8    5.77    0.69
   1  11   8    6.75    0.69
   1  11   8    4.89    0.67
  -2  11   8    0.76    0.44
   2 -11   8    1.19    0.66
   2  11  -8    0.61    0.44
   2  11   8    1.16    0.48
  -2  11  -8    0.35    0.51
   2 -11  -8    0.80    0.69
   2  11   8    0.13    0.59
  -2 -11   8    0.38    0.59
   3 -11   8    1.60    0.66
  -3  11   8    0.74    0.45
   3  11  -8    2.50    0.55
   3 -11  -8    0.90    0.67
  -3 -11   8    2.14    0.66
   3  11   8    1.20    0.49
   3  11   8    0.81    0.66
  -3  11  -8    1.62    0.59
  -4  11   8    1.33    0.57
   4 -11   8    1.50    0.80
   4  11  -8    2.04    0.59
   4 -11  -8    1.26    0.73
  -4  11  -8    2.17    0.66
   4  11   8    1.04    0.53
   4  11   8    1.60    0.68
   5 -11   8    1.37    0.84
  -5  11   8    2.56    0.69
   5  11  -8    2.46    0.67
  -5  11  -8    3.29    1.31
   5 -11  -8    0.54    0.84
   5  11   8    1.26    0.72
  -6  11   8   -0.28    0.72
   6 -11   8    0.17    0.95
   6  11  -8    0.83    1.19
   6 -11  -8   -1.21    0.90
   6  11   8   -0.61    0.88
   0  12   8   -0.77    0.49
   0  12  -8    0.20    0.53
   0 -12   8   -0.36    0.60
   1  12  -8    0.29    0.53
  -1  12   8    0.77    0.52
   1 -12   8    1.18    0.68
  -1 -12   8    1.42    0.67
  -1  12  -8    0.36    0.56
   1  12   8    0.86    0.48
  -2  12   8    1.22    0.59
   2 -12   8    2.45    0.70
   2  12  -8    2.44    0.57
   2  12   8    1.91    0.54
  -2  12  -8    2.93    0.60
   2  12   8    2.90    0.69
  -2 -12   8    2.28    0.69
  -3  12   8    7.49    0.83
   3  12  -8    7.52    0.83
   3 -12   8    8.57    1.03
   3  12   8    6.86    0.98
   3  12   8    8.08    0.83
   3 -12  -8    9.03    1.45
  -3  12  -8    6.89    0.85
  -4  12   8    1.16    0.57
   4 -12   8    1.54    0.90
   4  12  -8    0.33    0.62
   4 -12  -8    1.97    0.87
   4  12   8    1.00    0.83
  -4  12  -8    1.62    0.74
   4  12   8    1.66    1.02
  -5  12   8    1.05    0.68
   5 -12   8    0.21    0.92
   5  12   8    0.12    0.60
   5 -12  -8    0.48    1.05
  -5  12  -8    1.44    0.71
   0  13  -8    0.33    0.62
   0  13   8   -0.05    0.57
   0 -13   8    1.27    0.73
   1  13  -8    2.51    0.71
  -1  13   8    2.45    0.66
   1 -13   8    3.67    0.81
  -1 -13   8    4.19    0.86
  -1  13  -8    4.42    0.75
   1  13   8    4.43    0.73
   2  13  -8    1.41    0.66
  -2  13   8    1.21    0.66
   2 -13   8    1.43    0.73
   2  13   8    1.17    0.64
  -2  13  -8    0.56    0.66
   3 -13   8    3.29    0.85
   3  13  -8    2.67    0.69
   3  13   8    2.83    0.68
  -3  13  -8    2.03    0.75
  -4  13   8    0.67    0.62
   4 -13   8    1.33    0.86
   4  13  -8    1.03    0.73
   4  13   8    0.23    0.62
  -4  13  -8    1.19    0.79
   0  14   8    4.65    0.79
   0  14  -8    3.82    0.96
   0 -14   8    4.08    0.92
   1 -14   8    1.48    0.93
  -1  14   8    1.23    0.63
   1  14  -8   -0.36    0.76
  -1  14  -8    0.73    0.73
   1  14   8    0.47    0.69
   2  14  -8    0.62    0.76
   2 -14   8    0.78    0.90
  -2  14   8    0.13    0.69
   2  14   8   -0.52    0.67
  -2  14  -8    0.12    0.67
   0   0   9   -0.04    0.19
   0   0   9    0.08    0.19
   1   0   9   23.44    1.35
   1   0   9   25.43    1.34
  -1   0   9   24.61    1.38
  -1   0  -9   24.06    1.37
   1   0   9   23.71    1.27
  -1   0   9   24.23    1.35
   2   0   9  104.62    5.47
  -2   0   9  108.26    5.50
   2   0  -9  104.60    5.37
   2   0   9  109.84    5.45
  -2   0   9  103.49    5.50
   3   0   9    2.54    0.36
   3   0   9    2.08    0.33
  -3   0   9    2.71    0.44
   3   0  -9    2.82    0.33
   3   0  -9    2.28    0.25
   4   0   9   31.42    1.75
  -4   0   9   30.73    1.88
   4   0   9   31.57    1.74
   4   0  -9   30.75    1.73
   5   0   9    0.20    0.37
   5   0  -9    0.52    0.30
   5   0   9    0.72    0.38
  -6   0   9    9.57    1.09
   6   0   9   10.19    0.82
   6   0  -9    8.24    0.77
   6   0   9    9.11    0.81
   7   0   9    0.55    0.54
   7   0   9    0.03    0.46
  -7   0   9    0.26    0.75
   7   0  -9    0.59    0.48
  -8   0   9    2.60    1.06
   8   0  -9    4.90    0.74
   8   0   9    4.06    0.78
   9   0  -9    5.68    0.94
  -9   0   9    7.91    1.59
   9   0   9    7.59    1.04
   0   1   9   76.98    3.90
   0  -1   9   78.96    3.97
   0   1   9   78.20    3.99
   0  -1   9   76.45    4.00
   0  -1   9   75.38    3.89
   0  -1  -9   76.32    3.99
   0   1   9   77.20    3.99
   1  -1   9   31.52    1.65
  -1   1   9   33.74    1.78
   1  -1   9   34.41    1.75
  -1   1   9   32.68    1.74
   1  -1   9   32.03    1.73
  -1  -1  -9   30.33    1.72
   1   1   9   32.78    1.72
   1   1   9   30.64    1.76
  -1  -1   9   31.31    1.77
  -1  -1   9   31.19    1.73
  -2   1   9   20.66    1.13
   2  -1   9   19.29    1.10
   2  -1   9   18.35    1.03
  -2  -1  -9   17.99    1.07
   2  -1   9   18.49    1.10
   2   1   9   18.37    1.11
   2  -1  -9   18.76    1.06
   2  -1  -9   18.28    0.97
  -2  -1   9   17.43    1.15
   2   1   9   18.00    1.05
  -2  -1   9   19.49    1.16
   3  -1   9   18.14    1.06
   3  -1   9   17.10    1.05
   3   1  -9   16.63    1.03
  -3  -1  -9   16.59    1.05
  -3   1   9   16.95    1.12
  -3  -1   9   16.37    1.13
   3   1   9   17.62    1.06
   3  -1  -9   17.53    1.03
   4   1  -9   31.23    1.75
   4  -1   9   31.37    1.77
   4  -1   9   33.47    1.78
  -4   1   9   33.38    1.90
   4   1   9   31.54    1.73
   4  -1  -9   30.06    1.75
  -4  -1   9   30.29    1.93
   4   1   9   30.72    1.78
   5  -1   9    2.36    0.47
   5  -1   9    3.05    0.45
   5   1  -9    2.21    0.38
   5   1   9    3.33    0.44
   5   1   9    2.62    0.44
   6  -1   9    8.66    0.80
   6   1  -9    8.30    0.72
   6  -1   9   11.15    0.84
  -6   1   9    6.67    1.00
   6   1   9    8.57    0.73
  -6  -1   9   10.31    1.11
   6  -1  -9    8.77    0.77
   6   1   9    8.58    0.78
   7   1  -9    1.62    0.49
   7  -1   9    1.52    0.60
   7  -1   9    1.76    0.53
  -7   1   9    2.05    0.85
   7  -1  -9    0.69    0.49
   7   1   9    1.93    0.59
  -7  -1   9    2.14    0.83
   8   1  -9    2.50    0.64
   8  -1   9    1.80    0.70
  -8   1   9    3.49    1.07
   8   1   9    1.60    0.63
  -8  -1   9    1.07    1.07
   8  -1  -9    2.96    0.68
   9  -1   9    1.24    0.89
  -9   1   9   -0.31    1.18
   9   1  -9    1.04    0.75
  -9  -1   9    3.51    1.41
   9  -1  -9    1.77    0.82
   9   1   9    2.15    0.83
   0   2   9   49.96    2.61
   0  -2   9   49.64    2.62
   0   2  -9   49.99    2.51
   0  -2   9   48.55    2.57
   0   2  -9   47.87    2.60
   0  -2   9   49.25    2.51
   0   2   9   49.19    2.52
   0   2   9   50.53    2.63
   0  -2  -9   48.56    2.60
  -1   2   9   11.10    0.72
   1   2  -9   10.51    0.58
  -1  -2  -9   11.57    0.69
   1  -2   9   10.88    0.72
  -1   2   9   10.66    0.58
  -1  -2   9   11.06    0.72
  -1   2  -9   10.16    0.71
   1   2   9   10.35    0.75
   1   2   9   10.56    0.67
   1  -2  -9   10.91    0.66
  -1  -2   9   11.94    0.77
  -2   2   9    4.00    0.42
   2  -2   9    3.32    0.32
   2  -2   9    3.23    0.37
   2  -2   9    3.14    0.41
  -2  -2   9    2.85    0.41
   2  -2  -9    3.49    0.26
   2   2   9    3.81    0.32
  -2  -2   9    3.03    0.42
   2  -2  -9    3.17    0.34
   2   2   9    3.31    0.42
   3  -2   9    8.94    0.69
  -3  -2  -9    8.13    0.62
   3  -2   9    8.74    0.66
  -3   2   9   10.04    0.76
   3   2   9    9.32    0.74
   3  -2  -9    7.93    0.59
   3  -2  -9    8.91    0.56
  -3  -2   9    7.88    0.75
   3   2   9    7.77    0.58
  -3  -2   9    8.51    0.71
   4  -2   9    4.11    0.51
   4  -2   9    5.02    0.48
  -4   2   9    4.20    0.63
   4   2  -9    4.61    0.47
   4  -2  -9    3.62    0.44
  -4  -2   9    3.35    0.61
   4   2   9    4.58    0.46
   4   2   9    3.91    0.49
   5  -2   9   15.93    1.07
   5  -2   9   15.73    1.13
   5   2  -9   17.99    1.04
   5   2   9   15.18    1.00
   5  -2  -9   16.03    1.06
   5   2   9   15.67    1.16
   6  -2   9    2.92    0.52
   6   2  -9    2.55    0.44
  -6   2   9    2.42    0.73
   6  -2   9    3.09    0.59
  -6  -2   9    2.50    0.75
   6   2   9    2.63    0.51
   6  -2  -9    2.62    0.49
  -7   2   9    8.44    1.19
   7   2  -9   12.28    0.95
   7  -2   9   10.83    1.00
   7  -2   9   12.10    0.96
   7  -2  -9   11.17    0.96
  -7  -2   9    8.90    1.21
   7   2   9   10.99    0.96
   8   2  -9    1.88    0.63
  -8   2   9    4.29    1.21
   8  -2   9    2.86    0.71
   8  -2   9    2.34    0.79
   8  -2  -9    2.47    0.66
  -8  -2   9    2.01    1.06
   8   2   9    2.54    0.73
  -9   2   9   -0.45    1.27
   9   2  -9   -0.18    0.72
   9  -2  -9   -0.10    0.74
  -9  -2   9    0.38    1.30
   9   2   9   -0.03    0.77
   0   3   9   26.90    1.42
   0  -3   9   26.02    1.37
   0   3  -9   25.28    1.31
   0  -3   9   25.66    1.31
   0  -3  -9   24.03    1.34
   0  -3   9   24.81    1.42
   0   3   9   24.50    1.31
   0  -3  -9   24.14    1.39
   0   3  -9   23.94    1.38
   1  -3   9    5.90    0.43
   1  -3   9    7.54    0.58
   1  -3   9    7.00    0.46
  -1   3   9    6.98    0.54
   1   3  -9    6.40    0.40
  -1   3   9    6.16    0.40
  -1  -3   9    6.39    0.56
   1  -3  -9    6.74    0.47
  -1   3  -9    6.67    0.45
   1   3   9    5.69    0.48
  -1   3  -9    6.13    0.52
  -1  -3   9    7.07    0.55
   1   3   9    6.18    0.57
  -2  -3  -9    4.01    0.33
  -2   3   9    2.64    0.39
  -2   3   9    4.40    0.32
   2   3  -9    3.82    0.29
   2  -3   9    3.39    0.44
   2   3   9    2.65    0.43
  -2  -3   9    4.00    0.46
   2  -3  -9    3.38    0.29
  -2   3  -9    3.88    0.36
   2   3   9    3.80    0.32
   2  -3  -9    3.98    0.37
  -2  -3   9    3.52    0.46
   3  -3   9   16.95    1.01
   3  -3   9   17.83    1.07
  -3   3   9   15.87    1.10
   3   3   9   15.95    0.93
   3  -3  -9   16.67    1.01
   3   3   9   17.04    1.11
  -3  -3   9   17.98    1.16
  -3  -3   9   15.02    1.14
   4  -3   9   -0.11    0.41
   4   3  -9    0.00    0.25
  -4   3   9    0.41    0.48
   4  -3   9   -0.07    0.31
   4   3   9    0.02    0.22
   4   3   9    0.39    0.35
  -4  -3   9    0.46    0.55
   4  -3  -9    0.00    0.29
  -5   3   9    9.97    1.03
   5  -3   9   10.57    0.82
   5  -3   9    9.36    0.83
   5   3  -9   10.22    0.78
   5   3   9    8.67    0.79
  -5  -3   9   10.91    1.04
   5  -3  -9    9.97    0.77
   6  -3   9    1.20    0.46
   6  -3   9    1.39    0.56
  -6   3   9    0.95    0.67
   6   3  -9    0.82    0.42
   6   3   9    0.41    0.43
   6  -3  -9    0.92    0.40
  -6  -3   9    1.16    0.71
   7  -3   9    8.10    0.94
   7   3  -9    8.75    0.78
   7  -3   9    9.60    0.84
  -7   3   9    6.63    1.16
   7  -3  -9    9.02    0.84
  -7  -3   9    6.65    1.11
   7   3   9    7.68    0.86
   8  -3   9    3.66    0.85
   8   3  -9    5.04    0.75
  -8   3   9    4.50    1.23
   8  -3   9    4.54    0.78
   8   3   9    2.73    0.71
  -8  -3   9    3.64    1.38
   8  -3  -9    4.50    0.80
  -9   3   9    3.19    1.31
   9   3  -9    4.73    0.87
   9  -3  -9    3.32    0.84
   9   3   9    3.20    0.84
  -9  -3   9    5.27    1.52
   0  -4   9   12.58    0.81
   0  -4  -9   10.45    0.78
   0  -4   9   11.93    0.68
   0  -4   9   12.62    0.73
   0   4  -9   12.17    0.69
   0   4   9   11.58    0.68
   0   4  -9   11.53    0.76
   0   4   9   10.77    0.79
   0  -4  -9   11.80    0.69
   1  -4   9   41.36    2.29
  -1   4   9   43.89    2.28
   1   4  -9   42.70    2.28
   1  -4   9   44.32    2.29
   1  -4   9   41.49    2.39
  -1  -4  -9   44.45    2.29
  -1  -4  -9   47.64    2.27
  -1   4   9   44.57    2.36
  -1  -4   9   43.32    2.39
   1  -4  -9   43.50    2.31
  -1   4  -9   40.99    2.30
   1   4   9   48.49    2.42
  -1  -4   9   45.47    2.37
  -2   4   9    9.57    0.59
   2   4  -9    8.55    0.56
  -2  -4  -9    9.16    0.52
   2  -4   9    8.05    0.69
  -2  -4  -9    9.17    0.56
  -2   4   9    9.05    0.69
   2  -4   9    8.42    0.59
  -2   4  -9    9.17    0.60
   2  -4  -9    9.19    0.61
  -2  -4   9    9.78    0.75
  -2  -4   9    8.39    0.72
   2  -4  -9    7.86    0.58
  -2   4  -9   10.93    0.65
   2   4   9    9.63    0.74
  -3   4   9   10.49    0.84
  -3   4   9    9.39    0.68
   3  -4   9   11.16    0.72
   3  -4   9    9.48    0.79
   3   4   9   10.19    0.60
  -3  -4   9   10.08    0.88
   3   4   9   11.62    0.87
   3  -4  -9   11.35    0.74
  -3  -4   9   10.36    0.85
  -4   4   9   24.06    1.64
   4  -4   9   25.69    1.59
   4  -4   9   23.74    1.45
  -4  -4   9   25.95    1.71
  -4  -4   9   29.59    1.63
   4  -4  -9   25.00    1.47
   4   4   9   26.09    1.55
   5  -4   9    3.71    0.49
   5  -4   9    4.13    0.63
  -5   4   9    3.98    0.75
   5   4   9    3.80    0.59
  -5  -4   9    3.15    0.76
   5  -4  -9    4.01    0.50
   6   4  -9    6.99    0.69
  -6   4   9    7.36    1.02
   6  -4   9    6.03    0.66
   6  -4   9    6.63    0.79
   6   4   9    5.84    0.73
  -6  -4   9    6.28    1.05
   6  -4  -9    7.39    0.74
  -7   4   9    0.71    0.83
   7  -4   9    0.56    0.55
   7   4  -9    1.21    0.49
   7  -4   9    1.04    0.67
  -7  -4   9    0.88    0.97
   7  -4  -9    1.65    0.61
   7   4   9    1.20    0.56
  -8   4   9    3.77    1.19
   8   4  -9    3.22    0.66
   8  -4   9    3.44    0.85
   8  -4  -9    3.21    0.79
   8   4   9    3.13    1.22
   0   5   9    3.43    0.32
   0   5  -9    3.20    0.32
   0  -5  -9    3.31    0.41
   0  -5   9    3.33    0.45
   0   5  -9    2.67    0.35
   0   5   9    4.50    0.48
   0  -5   9    3.09    0.35
   0  -5  -9    3.44    0.31
  -1  -5  -9   28.63    1.27
   1   5  -9   23.19    1.30
   1   5  -9   20.60    1.33
   1  -5   9   22.98    1.29
   1  -5   9   21.43    1.40
  -1   5   9   23.69    1.39
  -1   5   9   24.56    1.30
  -1   5  -9   21.46    1.29
  -1   5  -9   24.39    1.32
   1  -5  -9   22.80    1.31
  -1  -5   9   22.38    1.39
   1   5   9   26.75    1.32
   1   5   9   30.44    1.49
  -1  -5   9   22.71    1.43
   2  -5   9    5.69    0.61
   2   5  -9    6.14    0.45
  -2   5   9    5.67    0.55
   2  -5   9    5.63    0.43
  -2   5   9    5.65    0.45
  -2  -5   9    6.55    0.63
   2   5   9    5.72    0.60
  -2   5  -9    6.54    0.51
   2  -5  -9    6.50    0.50
  -2  -5   9    6.00    0.63
  -3   5   9    1.61    0.45
   3  -5   9    1.81    0.31
   3   5  -9    1.84    0.28
  -3   5   9    1.76    0.30
   3  -5   9    1.84    0.45
  -3   5  -9    1.81    0.40
  -3  -5   9    1.67    0.49
  -3  -5   9    1.76    0.52
   3   5   9    2.16    0.45
   3  -5  -9    2.16    0.36
   4  -5   9    0.67    0.49
  -4   5   9    0.47    0.49
  -4   5   9    0.54    0.32
   4  -5   9    0.70    0.32
   4  -5  -9    1.10    0.37
   4   5   9    0.86    0.46
  -4  -5   9    1.99    0.63
  -4  -5   9    1.76    0.49
  -5   5   9    2.48    0.69
   5   5  -9    2.73    0.45
   5  -5   9    1.56    0.57
   5  -5   9    1.92    0.43
   5  -5  -9    2.73    0.47
  -5  -5   9    2.75    0.71
   5   5   9    2.36    0.54
  -6   5   9    5.00    0.88
   6   5  -9    5.47    0.61
   6  -5   9    5.74    0.81
  -6  -5   9    4.58    1.01
   6   5   9    4.95    0.73
   6  -5  -9    5.48    0.71
   7   5  -9    1.12    0.51
  -7   5   9    0.92    0.96
   7  -5   9   -0.72    0.68
   7   5   9    1.00    0.58
   7  -5  -9    0.38    0.61
  -7  -5   9    0.74    0.90
   8   5  -9    0.50    0.64
   8  -5   9    0.86    0.86
  -8   5   9   -0.67    1.01
   8  -5  -9    0.62    0.72
   8   5   9    0.45    0.66
  -8  -5   9    1.25    1.11
   0   6  -9    6.20    0.51
   0   6   9    7.21    0.53
   0  -6   9    6.32    0.64
   0   6   9    7.30    0.65
   0  -6   9    6.86    0.53
   0  -6  -9    7.21    0.53
  -1   6   9    7.70    0.63
  -1   6   9    8.09    0.56
   1   6  -9    8.38    0.57
   1  -6   9    6.80    0.51
   1  -6   9    7.04    0.68
  -1  -6  -9    7.94    0.49
   1   6   9    6.91    0.55
  -1  -6   9    6.49    0.65
  -1   6  -9    8.14    0.59
   1  -6  -9    6.66    0.55
   1   6   9    7.07    0.70
   2   6  -9    7.43    0.55
   2  -6   9    7.54    0.47
  -2   6   9    6.56    0.62
   2  -6   9    7.61    0.72
  -2   6   9    6.84    0.54
  -2   6  -9    6.94    0.59
  -2  -6   9    7.20    0.67
   2   6   9    7.06    0.69
   2  -6  -9    8.52    0.61
  -2  -6   9    7.18    0.71
   3  -6   9    5.84    0.69
  -3   6   9    5.31    0.59
  -3   6   9    6.16    0.50
   3   6  -9    5.57    0.48
   3  -6  -9    5.32    0.54
   3   6   9    6.24    0.68
  -3  -6   9    5.34    0.70
  -3  -6   9    6.09    0.67
  -3   6  -9    5.67    0.58
   4  -6   9    3.92    0.65
  -4   6   9    4.44    0.62
  -4   6   9    4.59    0.49
  -4  -6   9    4.25    0.61
   4  -6  -9    4.77    0.56
  -4  -6   9    5.28    0.77
   4   6   9    5.35    0.66
   5  -6   9    2.09    0.64
   5   6  -9    2.64    0.47
  -5   6   9    1.90    0.70
   5   6   9    1.32    0.51
   5  -6  -9    2.30    0.48
  -5  -6   9    2.16    0.76
   6   6  -9    2.01    0.50
  -6   6   9    1.95    0.81
   6  -6   9    1.23    0.70
   6  -6  -9    1.41    0.59
   6   6   9    0.83    0.54
  -6  -6   9    0.75    0.88
   7   6  -9    1.55    0.57
   7  -6   9    1.57    0.78
  -7   6   9    2.07    0.99
  -7  -6   9    1.58    1.10
   7   6   9    1.64    0.65
   7  -6  -9    1.20    0.61
  -8   6   9    6.85    2.34
   8   6  -9    3.80    0.75
   8  -6   9    2.99    0.95
   8  -6  -9    4.77    0.94
   8   6   9    3.56    0.85
   0  -7  -9    0.98    0.28
   0   7   9    1.88    0.39
   0   7  -9    1.10    0.33
   0  -7   9    2.03    0.48
   0  -7   9    0.96    0.32
   0   7   9    1.27    0.31
  -1   7   9    5.14    0.54
   1   7  -9    3.58    0.43
   1  -7   9    5.65    0.64
  -1   7   9    5.49    0.47
  -1   7  -9    4.85    0.49
  -1  -7   9    6.27    0.65
   1   7   9    5.42    0.48
  -1  -7   9    5.05    0.55
   1   7   9    5.61    0.60
   1  -7  -9    4.93    0.47
  -2   7   9   10.67    0.76
   2   7  -9   11.30    0.74
   2  -7   9   10.59    0.91
  -2   7   9    9.06    0.79
   2  -7  -9   11.66    0.81
  -2   7  -9   10.18    0.75
   2   7   9   11.06    0.76
   2   7   9   11.44    0.90
  -2  -7   9    9.45    0.84
  -2  -7   9   11.69    0.87
   3  -7   9    6.38    0.73
  -3   7   9    6.57    0.59
  -3   7   9    6.77    0.72
   3   7  -9    8.53    0.64
  -3   7  -9    9.45    0.70
  -3  -7   9    8.89    0.78
   3   7   9    8.02    0.83
  -3  -7   9    7.79    0.82
   3  -7  -9    8.20    0.69
   4  -7   9   10.55    0.95
  -4   7   9   10.95    0.81
   4   7  -9   10.74    0.76
  -4   7   9    9.47    0.93
   4   7   9    8.91    0.91
  -4   7  -9    9.61    0.81
  -4  -7   9    9.58    1.02
  -4  -7   9   11.57    1.31
   4  -7  -9    9.20    0.83
  -5   7   9    1.25    0.71
   5  -7   9    1.34    0.65
   5   7  -9    1.60    0.43
  -5   7   9    1.89    0.48
   5  -7  -9    1.23    0.49
  -5  -7   9    2.61    0.86
   5   7   9    1.01    0.54
   6  -7   9    5.11    0.85
  -6   7   9    4.57    0.95
   6   7  -9    5.01    0.64
   6   7   9    4.41    0.72
   6  -7  -9    4.24    0.73
  -6  -7   9    3.33    1.04
   7   7  -9    0.93    0.59
  -7   7   9    0.36    1.02
   7  -7   9    0.80    0.82
   7   7  -9    0.44    0.59
  -8   7   9    1.93    1.61
   8  -7   9    2.48    1.04
   8   7  -9    2.92    0.82
   8   7   9    1.54    0.90
   8  -7  -9    1.83    0.91
   0  -8  -9    8.48    0.59
   0   8  -9    6.51    0.60
   0   8   9    7.33    0.60
   0  -8   9    7.03    0.71
   0   8   9    8.83    0.71
  -1   8   9    3.01    0.44
   1   8  -9    4.44    0.47
   1  -8   9    3.27    0.60
  -1   8   9    3.97    0.43
   1   8   9    4.53    0.46
  -1   8  -9    4.22    0.47
   1   8   9    4.33    0.60
   1  -8  -9    3.97    0.47
  -1  -8   9    4.75    0.57
  -2   8   9   16.38    1.08
  -2   8   9   16.79    1.02
   2  -8   9   13.64    1.12
   2   8  -9   15.12    1.00
  -2  -8   9   15.37    1.15
   2  -8  -9   17.09    1.08
   2   8   9   15.34    1.14
  -2  -8   9   15.33    1.13
   2   8   9   15.03    0.99
  -2   8  -9   16.73    1.05
  -3   8   9    0.26    0.32
   3   8  -9    0.84    0.35
   3  -8   9    0.55    0.48
  -3   8   9    0.67    0.45
   3  -8  -9    0.29    0.42
   3   8   9    0.31    0.53
  -3   8  -9    0.46    0.42
  -3  -8   9    0.22    0.58
  -4   8   9    3.44    0.49
  -4   8   9    3.39    0.67
   4   8  -9    3.98    0.55
   4  -8   9    4.65    0.68
  -4  -8   9    2.80    0.77
  -4   8  -9    4.13    0.60
   4  -8  -9    3.01    0.55
   4   8   9    4.62    0.72
  -4  -8   9    3.35    0.68
  -5   8   9    2.80    0.53
   5   8  -9    4.01    0.52
  -5   8   9    4.84    0.86
   5  -8   9    5.03    0.78
   5   8  -9    3.60    0.57
  -5  -8   9    3.38    0.94
   5  -8  -9    3.63    0.66
   5   8   9    3.09    0.67
   6  -8   9    2.94    0.85
  -6   8   9    2.32    0.97
   6   8  -9    1.13    0.55
   6   8  -9    2.66    0.62
   6  -8  -9    2.49    0.74
   6   8   9    0.82    0.66
  -7   8   9   -0.02    1.11
   7  -8   9    0.47    0.89
   7   8  -9    0.41    0.67
   7   8   9   -0.04    0.69
   7  -8  -9   -0.21    0.80
   0  -9   9    5.62    0.68
   0   9   9    5.00    0.53
   0   9  -9    4.84    0.53
   0   9   9    4.12    0.54
  -1   9   9   14.08    0.99
  -1   9   9   15.99    1.02
   1   9  -9   14.17    0.99
   1  -9   9   15.77    1.17
   1   9   9   14.28    1.10
  -1  -9   9   13.31    1.10
   1   9   9   13.85    1.05
  -1   9  -9   13.95    1.01
   1  -9  -9   14.82    1.03
   2  -9   9    7.22    0.82
   2   9  -9    8.69    0.69
  -2   9   9    7.07    0.70
   2  -9  -9    8.41    0.73
  -2   9  -9    6.63    0.70
   2   9   9    8.83    0.71
   2   9   9    7.86    0.84
  -2  -9   9    8.08    0.81
  -3   9   9    3.49    0.50
   3   9  -9    2.89    0.69
  -3   9   9    2.68    0.57
   3  -9   9    3.46    0.69
  -3   9  -9    3.37    0.55
   3   9   9    3.14    0.62
  -3  -9   9    3.32    0.65
   3   9   9    2.96    0.49
   3  -9  -9    3.10    0.56
  -4   9   9    1.27    0.64
   4   9  -9    0.96    0.45
  -4   9   9    0.84    0.45
   4  -9   9    0.88    0.58
   4   9   9    0.58    0.62
  -4  -9   9    0.88    0.64
  -4   9  -9    0.19    0.53
   4  -9  -9    0.63    0.56
  -5   9   9    2.39    0.59
   5   9  -9    2.94    0.60
   5  -9   9    1.98    0.69
  -5   9   9    3.15    0.86
   5   9  -9    3.88    0.58
   5   9   9    2.21    0.69
  -5  -9   9    2.09    0.75
   5  -9  -9    1.48    0.67
   6   9  -9    6.49    0.82
   6   9  -9    7.10    0.75
   6  -9  -9    4.37    0.91
   6   9   9    5.41    0.96
   7  -9   9    3.56    1.07
   7  -9  -9    4.89    0.99
   7   9   9    4.88    1.02
   0 -10   9    0.32    0.52
   0  10  -9    0.61    0.44
   0  10   9   -0.07    0.39
   0  10   9    0.60    0.41
   1  10  -9   13.05    0.99
   1 -10   9   14.01    1.12
  -1  10   9   14.91    1.03
  -1  10   9   13.89    1.00
   1  10   9   13.61    1.08
  -1  10  -9   13.69    1.02
  -1 -10   9   12.82    1.08
   1  10   9   12.46    0.94
  -2  10   9    2.54    0.53
   2 -10   9    2.84    0.67
  -2  10   9    3.11    0.52
   2  10  -9    2.17    0.50
   2 -10  -9    2.40    0.59
  -2  10  -9    3.23    0.52
  -2 -10   9    2.38    0.61
   2  10   9    2.38    0.45
   2  10   9    1.94    0.63
  -3  10   9    3.42    0.65
   3  10  -9    2.76    0.53
  -3  10   9    3.28    0.49
   3 -10   9    4.39    0.76
  -3 -10   9    3.28    0.69
  -3  10  -9    3.26    0.59
   3  10   9    2.35    0.68
   3 -10  -9    3.64    0.69
   3  10   9    3.23    0.55
   4 -10   9    1.86    0.67
  -4  10   9    2.82    0.56
   4  10  -9    2.53    0.56
   4 -10  -9    1.18    0.67
  -4 -10   9    1.39    0.70
  -4  10  -9    2.02    0.65
   4  10   9    1.52    0.71
   4  10   9    2.61    0.52
   5 -10   9    6.86    1.01
  -5  10   9    7.56    0.84
   5  10  -9    8.99    0.85
   5  10   9    7.54    0.97
  -5  10  -9    6.15    0.87
   5 -10  -9    6.46    0.93
   6  10  -9    0.63    0.60
   6 -10   9    0.05    0.85
   6  10   9   -0.47    0.83
   6 -10  -9   -0.15    0.86
   0  11   9    2.70    0.55
   0  11  -9    3.17    0.55
   0 -11   9    3.59    0.70
   0  11   9    3.29    0.55
  -1  11   9    0.25    0.41
   1  11  -9   -0.08    0.46
  -1  11   9   -0.06    0.43
   1 -11   9    0.27    0.60
  -1  11  -9    0.29    0.49
   1  11   9    0.50    0.52
   1  11   9   -0.35    0.44
  -1 -11   9    0.22    0.58
   2  11  -9    5.25    0.64
  -2  11   9    5.29    0.66
   2 -11   9    5.00    0.79
  -2  11  -9    5.92    0.67
   2  11   9    5.03    0.75
   2  11   9    6.80    0.72
  -2 -11   9    6.52    0.81
   3  11  -9    3.15    0.61
   3 -11   9    1.90    0.77
  -3  11   9    4.31    0.62
  -3 -11   9    3.69    0.76
   3  11   9    3.85    0.79
  -3  11  -9    2.12    0.63
   3  11   9    3.63    0.59
   3 -11  -9    3.89    0.76
   4  11  -9   -0.43    0.54
  -4  11   9    0.41    0.53
   4 -11   9    0.05    0.76
  -4 -11   9    0.40    0.93
   4  11   9    0.44    0.76
  -4  11  -9   -0.37    0.63
   4 -11  -9   -0.21    0.73
   4  11   9    0.10    0.49
  -5  11   9    0.55    0.58
   5 -11   9    1.04    0.80
   5  11  -9    0.68    0.60
   5 -11  -9   -0.60    0.80
   5  11   9   -0.23    0.83
   5  11   9    1.35    0.63
  -6  11   9    3.04    0.75
   6 -11   9    2.66    1.02
   6  11  -9    3.07    0.85
   6 -11  -9    1.51    0.99
   6  11   9    0.89    0.93
   0 -12   9    1.79    0.68
   0  12  -9    1.00    0.58
   0  12   9    2.21    0.57
   1 -12   9    2.49    0.74
  -1  12   9    2.37    0.59
   1  12  -9    1.54    0.61
   1  12   9    1.62    0.53
  -1  12  -9    2.29    0.60
  -1 -12   9    3.14    0.75
   1  12   9    2.75    0.62
   2  12  -9    0.46    0.59
  -2  12   9    1.51    0.59
   2 -12   9    0.21    0.73
   2  12   9    0.96    0.51
  -2  12  -9    1.74    0.57
  -2 -12   9    1.16    0.70
   2  12   9    1.56    0.65
   3 -12   9    1.52    0.82
   3  12  -9    0.75    0.55
  -3  12   9    1.54    0.61
   3  12   9    1.90    0.57
   3  12   9    1.89    0.80
  -3 -12   9    2.60    0.81
  -3  12  -9    1.84    0.66
  -4  12   9    1.54    0.64
   4  12  -9    0.07    0.61
   4 -12   9    0.65    0.83
   4  12   9   -0.68    0.81
   4 -12  -9   -0.40    0.82
   4  12   9    0.35    0.64
  -5  12   9    1.87    0.75
   5 -12   9    3.24    0.92
  -5  12  -9    1.53    0.83
   5  12   9    2.37    0.70
   5 -12  -9    0.09    0.94
   5  12   9    0.60    0.94
   0  13  -9    1.75    0.70
   0 -13   9    2.07    0.79
   0  13   9    2.06    0.66
   1  13  -9    0.32    0.64
  -1  13   9   -0.15    0.57
   1 -13   9    1.01    0.73
  -1  13  -9   -0.12    0.65
   1  13   9    0.35    0.60
  -1 -13   9    0.46    0.77
   2  13  -9    0.05    0.67
  -2  13   9    2.47    0.70
   2 -13   9    3.09    0.92
  -2 -13   9    2.05    0.83
  -2  13  -9    0.98    0.69
   3 -13   9    1.59    0.90
   3  13  -9    1.76    0.75
   3  13   9    1.35    0.69
  -3  13  -9    2.21    0.76
   4 -13   9    3.21    1.01
  -4  13   9    2.05    0.75
   4  13  -9    1.30    0.74
   4  13   9    3.04    0.74
  -4  13  -9    1.81    0.83
   0  14  -9    1.34    0.79
   0 -14   9    2.80    1.06
   0  14   9    2.62    0.74
   1  14  -9   -0.59    0.68
   1 -14   9    0.48    0.85
  -1  14   9    0.03    0.60
  -1 -14   9    0.09    1.00
   1  14   9   -0.28    0.69
  -1  14  -9    0.17    0.74
   2 -14   9    3.16    0.94
  -2  14   9    3.85    0.81
   2  14  -9    2.50    0.75
   2  14   9    2.43    0.77
  -2  14  -9    3.28    0.78
   0   0  10  112.26    5.87
   0   0  10  115.74    5.86
  -1   0  10   83.58    4.21
   1   0  10   79.71    4.09
   1   0  10   79.40    4.16
   1   0  10   79.69    4.18
  -1   0  10   79.63    4.17
  -2   0  10   12.27    0.83
   2   0 -10   11.95    0.62
   2   0  10   11.02    0.80
   2   0  10   12.05    0.78
  -2   0  10   11.85    0.84
   3   0 -10    6.75    0.55
   3   0  10    6.58    0.55
   3   0  10    7.78    0.62
  -3   0  10    6.26    0.64
   4   0  10   21.58    1.27
   4   0  10   21.43    1.25
   4   0 -10   20.17    1.22
  -4   0  10   18.32    1.37
  -5   0  10    5.15    0.77
   5   0  10    7.70    0.70
   5   0 -10    5.90    0.58
   5   0  10    6.51    0.61
   6   0  10   12.83    0.95
  -6   0  10   11.46    1.18
   6   0  10   12.26    0.97
   6   0 -10   12.16    0.97
   7   0  10   -0.65    0.46
  -7   0  10   -1.09    0.83
   7   0 -10    0.28    0.48
   8   0 -10   -0.06    0.58
   8   0  10   -0.36    0.57
  -8   0  10   -0.28    0.98
   9   0  10    2.62    0.89
  -9   0  10    2.99    1.46
   9   0 -10    2.33    0.83
   0   1  10    3.94    0.40
   0  -1  10    4.49    0.39
   0  -1  10    3.85    0.41
   0   1  10    4.12    0.41
   1  -1  10    2.50    0.21
   1  -1  10    1.72    0.31
  -1   1  10    2.58    0.39
  -1   1  10    3.24    0.34
   1  -1  10    1.75    0.29
   1   1  10    2.24    0.30
   1   1  10    2.54    0.36
  -1  -1  10    2.01    0.35
  -1  -1  10    2.24    0.33
   2  -1  10   33.92    1.80
  -2   1  10   33.56    1.83
   2   1 -10   33.48    1.66
   2  -1  10   31.77    1.71
   2  -1  10   33.74    1.79
  -2  -1 -10   32.27    1.79
   2  -1 -10   31.05    1.76
   2   1  10   31.64    1.81
  -2  -1  10   30.74    1.83
   2   1  10   31.28    1.75
  -2  -1  10   34.79    1.85
   2  -1 -10   31.71    1.66
   3  -1  10   24.87    1.46
   3  -1  10   25.57    1.45
   3   1 -10   24.17    1.41
  -3   1  10   24.16    1.52
  -3  -1  10   24.46    1.53
   3   1  10   26.54    1.50
   3  -1 -10   26.13    1.43
   3   1  10   24.27    1.40
   4  -1  10   16.33    1.07
   4   1 -10   17.41    1.04
   4  -1  10   14.41    1.07
  -4   1  10   16.27    1.19
  -4  -1  10   17.17    1.23
   4   1  10   14.95    1.01
   4  -1 -10   17.07    1.03
   4   1  10   16.62    1.11
   5   1 -10    2.25    0.41
   5  -1  10    2.90    0.48
   5  -1  10    1.96    0.46
  -5   1  10    2.03    0.61
   5   1  10    2.84    0.42
  -5  -1  10    1.54    0.68
   5  -1 -10    1.84    0.37
   5   1  10    2.10    0.55
   6  -1  10    2.08    0.52
   6   1 -10    1.32    0.43
  -6   1  10    1.37    0.70
   6  -1  10    1.94    0.53
   6   1  10    0.72    0.45
  -6  -1  10    1.11    0.69
   6  -1 -10    1.33    0.45
  -7   1  10    1.39    0.84
   7   1 -10    0.33    0.45
   7  -1  10    1.28    0.60
   7  -1  10    0.00    0.53
  -7  -1  10    0.95    0.91
   7   1  10    0.31    0.56
   7  -1 -10    0.57    0.50
   8   1 -10    0.38    0.57
  -8   1  10    0.11    1.06
   8  -1  10    0.81    0.69
   8   1  10    1.22    0.70
   8  -1 -10    0.73    0.64
  -8  -1  10   -0.16    1.19
   9  -1  10    6.00    0.97
   9   1 -10    6.15    0.96
  -9   1  10    7.71    1.49
   9  -1 -10    6.40    1.01
   9   1  10    5.96    0.96
  -9  -1  10    6.07    1.45
   0   2  10    1.90    0.33
   0  -2  10    1.97    0.16
   0   2  10    2.45    0.18
   0  -2  10    2.06    0.28
   0  -2  10    2.37    0.37
   0   2  10    2.40    0.34
   1  -2  10    6.24    0.52
  -1  -2 -10    7.32    0.54
  -1   2  10    6.64    0.55
   1  -2  10    6.99    0.58
   1  -2  10    7.27    0.44
   1   2 -10    6.61    0.38
  -1   2  10    6.74    0.40
   1  -2 -10    7.58    0.51
  -1  -2  10    7.29    0.59
   1   2  10    7.31    0.60
  -1  -2  10    7.24    0.58
   1   2  10    7.72    0.54
   2  -2  10   34.91    1.87
   2  -2  10   32.73    1.83
   2   2 -10   34.56    1.72
  -2   2  10   30.35    1.86
   2  -2  10   32.89    1.77
  -2  -2 -10   33.42    1.81
   2   2  10   34.37    1.79
  -2  -2  10   31.81    1.89
   2  -2 -10   36.21    1.82
   2   2  10   32.90    1.88
   2  -2 -10   33.22    1.73
  -2  -2  10   33.81    1.88
  -3   2  10   42.14    2.25
   3  -2  10   39.73    2.16
   3  -2  10   38.80    2.14
   3   2  10   38.64    2.08
   3  -2 -10   38.16    2.12
  -3  -2  10   41.17    2.26
   3   2  10   38.75    2.18
  -3  -2  10   37.54    2.20
   4  -2  10    1.23    0.38
   4  -2  10    0.58    0.39
  -4   2  10    1.12    0.48
   4   2 -10    0.87    0.31
   4   2  10    0.75    0.39
  -4  -2  10    0.58    0.49
   4   2  10    0.52    0.28
   4  -2 -10    0.54    0.28
  -5   2  10   19.74    1.39
   5  -2  10   18.08    1.18
   5  -2  10   17.23    1.22
   5   2 -10   19.29    1.18
   5   2  10   17.03    1.10
   5  -2 -10   16.14    1.13
   5   2  10   18.99    1.25
  -5  -2  10   20.17    1.43
   6   2 -10    7.57    0.70
   6  -2  10    5.65    0.77
  -6   2  10    4.60    0.93
   6  -2  10    6.98    0.77
   6  -2 -10    7.62    0.72
   6   2  10    7.72    0.75
  -6  -2  10    5.71    0.95
  -7   2  10    2.62    0.89
   7  -2  10    1.43    0.58
   7  -2  10    0.89    0.61
   7   2 -10    2.67    0.56
   7  -2 -10    1.78    0.56
  -7  -2  10    1.84    0.96
   7   2  10    1.72    0.63
   8  -2  10    0.29    0.68
   8   2 -10    0.76    0.61
   8  -2  10    1.00    0.76
  -8   2  10    1.54    1.02
   8   2  10    0.50    0.69
   8  -2 -10    1.02    0.68
  -9   2  10    0.16    1.33
   9  -2  10   -0.90    0.86
   9   2 -10    0.49    0.75
   9   2  10   -0.03    0.74
  -9  -2  10    2.09    1.42
   9  -2 -10    0.65    0.82
   0  -3  10   55.94    2.95
   0  -3  10   57.82    3.07
   0   3  10   58.10    2.96
   0  -3  10   56.14    3.01
   0   3  10   58.69    3.07
   0  -3 -10   61.06    3.00
   0   3 -10   57.31    2.96
  -1   3  10   15.29    0.96
  -1   3  10   15.86    0.82
   1  -3  10   14.28    0.88
  -1  -3 -10   14.39    0.91
   1  -3  10   12.87    0.95
   1   3 -10   14.91    0.81
  -1  -3  10   17.30    0.96
  -1  -3  10   16.17    1.01
  -1   3 -10   14.64    0.85
   1  -3 -10   15.23    0.88
   1   3  10   15.15    0.91
   1   3  10   14.11    0.98
  -2   3  10    2.73    0.24
   2   3 -10    2.42    0.21
   2  -3  10    2.99    0.35
   2  -3  10    1.51    0.38
  -2  -3 -10    1.72    0.31
  -2   3  10    1.51    0.35
   2  -3 -10    2.24    0.31
   2   3  10    1.28    0.41
   2   3  10    2.14    0.28
  -2  -3  10    1.49    0.40
  -2  -3  10    1.63    0.39
   3  -3  10    3.70    0.51
   3  -3  10    3.15    0.42
  -3   3  10    3.32    0.53
  -3  -3  10    3.16    0.53
  -3  -3  10    5.14    0.62
   3   3  10    3.35    0.49
   3   3  10    4.07    0.35
   3  -3 -10    3.70    0.39
   4  -3  10    1.76    0.39
   4  -3  10    2.25    0.47
  -4   3  10    2.39    0.58
   4   3 -10    1.57    0.37
   4   3  10    1.50    0.45
   4  -3 -10    2.30    0.37
   4   3  10    1.88    0.35
  -4  -3  10    1.33    0.55
   5  -3  10   20.11    1.27
   5  -3  10   18.93    1.33
  -5   3  10   20.64    1.46
   5   3 -10   18.19    1.23
   5  -3 -10   21.11    1.26
   5   3  10   18.67    1.28
  -5  -3  10   19.79    1.49
   6  -3  10   11.54    0.97
  -6   3  10   11.43    1.19
   6  -3  10   10.44    0.87
   6   3 -10    9.32    0.82
  -6  -3  10   10.68    1.16
   6   3  10    9.94    0.92
   6  -3 -10   10.08    0.86
  -7   3  10    8.30    1.25
   7   3 -10   10.19    0.87
   7  -3  10    9.07    0.97
   7  -3  10    9.37    0.91
   7  -3 -10   10.20    0.93
   7   3  10    6.49    0.86
  -7  -3  10   10.68    1.35
   8   3 -10   -0.40    0.59
   8  -3  10   -0.29    0.67
   8  -3  10    0.10    0.76
  -8   3  10    0.15    1.09
  -8  -3  10   -0.65    1.22
   8  -3 -10    0.14    0.76
   0   4 -10   18.36    1.15
   0  -4 -10   19.85    1.08
   0  -4  10   18.29    1.11
   0   4  10   19.53    1.18
   0   4 -10   20.18    1.06
   0   4  10   20.56    1.06
   0  -4  10   18.38    1.19
   0  -4 -10   19.50    1.17
   1  -4  10   11.45    0.71
   1   4 -10   12.14    0.68
  -1   4  10   10.90    0.79
   1  -4  10   11.85    0.71
   1  -4  10   12.74    0.85
  -1   4  10   11.88    0.68
  -1  -4 -10   12.10    0.68
  -1  -4 -10   11.13    0.78
  -1   4 -10   11.61    0.75
  -1  -4  10   12.05    0.81
   1  -4 -10   11.64    0.74
   1   4  10   10.71    0.90
  -1   4 -10   10.69    0.76
  -1  -4  10   12.00    0.85
  -2   4  10   11.79    0.81
   2   4 -10   11.44    0.66
   2  -4  10   11.03    0.84
   2  -4 -10   10.16    0.73
  -2  -4  10   11.60    0.86
  -2  -4  10   10.56    0.86
  -2   4 -10   11.16    0.74
   2   4  10   11.90    0.94
  -3   4  10   17.08    1.25
   3  -4  10   16.92    1.12
  -3   4  10   19.85    1.08
   3  -4  10   21.28    1.26
  -3  -4  10   19.25    1.29
   3  -4 -10   18.14    1.12
   3   4  10   19.97    1.23
  -3  -4  10   19.12    1.31
   4  -4  10    6.23    0.66
  -4   4  10    4.71    0.69
   4  -4  10    5.44    0.53
   4  -4 -10    5.38    0.55
  -4  -4  10    5.52    0.75
  -4  -4  10    5.69    0.70
  -5   4  10    3.39    0.73
   5  -4  10    3.48    0.60
   5  -4  10    3.54    0.51
   5   4 -10    3.80    0.48
   5   4  10    2.26    0.53
   5  -4 -10    3.24    0.51
  -5  -4  10    2.89    0.78
   6  -4  10    4.72    0.61
   6   4 -10    5.87    0.60
   6  -4  10    5.58    0.76
  -6   4  10    4.53    0.86
   6   4  10    3.64    0.65
  -6  -4  10    4.67    0.96
   6  -4 -10    3.70    0.63
  -7   4  10    8.73    1.25
   7  -4  10    7.49    0.92
   7   4 -10    8.12    0.78
   7   4  10    7.52    0.89
  -7  -4  10    6.21    1.22
   7  -4 -10    9.08    0.91
   8  -4  10    2.71    0.90
   8   4 -10    3.28    0.72
  -8  -4  10    3.76    1.28
   8  -4 -10    4.01    0.83
   8   4  10    3.75    0.81
   0   5  10    5.35    0.56
   0  -5 -10    4.61    0.41
   0  -5 -10    5.22    0.55
   0  -5  10    6.49    0.50
   0   5 -10    6.81    0.47
   0   5  10    5.69    0.43
   0  -5  10    5.61    0.56
   1  -5  10    9.07    0.74
  -1  -5 -10   10.88    0.57
   1   5 -10   10.34    0.60
   1  -5  10    8.14    0.60
  -1   5  10    8.29    0.59
  -1   5  10    7.89    0.69
   1   5  10    9.74    0.60
  -1   5 -10    9.02    0.64
   1  -5 -10    9.06    0.62
  -1  -5  10    7.59    0.71
   1   5  10    8.83    0.75
  -1  -5  10    8.94    0.74
  -2   5  10   15.41    0.93
   2  -5  10   14.77    1.11
   2   5 -10   15.49    0.92
   2  -5  10   16.81    0.91
  -2   5  10   15.22    1.04
  -2  -5 -10   15.67    0.86
  -2   5 -10   17.10    0.99
   2   5  10   15.77    1.11
  -2  -5  10   14.81    1.12
  -2  -5  10   18.17    1.15
   2  -5 -10   16.97    0.98
   3   5 -10   25.53    1.43
   3  -5  10   25.91    1.58
  -3   5  10   27.19    1.45
  -3   5  10   25.42    1.62
   3  -5  10   30.69    1.63
   3   5  10   24.24    1.62
  -3  -5  10   23.99    1.66
  -3  -5  10   26.45    1.64
   3  -5 -10   25.82    1.51
   4  -5  10    7.37    0.73
  -4   5  10    6.78    0.88
   4  -5  10    6.59    0.56
  -4  -5  10    6.67    0.80
   4   5  10    7.31    0.74
  -4  -5  10    5.30    0.80
   4  -5 -10    4.71    0.62
  -5   5  10    9.19    1.01
   5   5 -10    8.02    0.72
   5  -5  10    9.45    0.89
   5  -5 -10    8.28    0.79
  -5  -5  10    9.32    1.07
   5   5  10    8.53    0.85
  -6   5  10    1.90    0.88
   6   5 -10    3.96    0.59
   6  -5  10    5.81    0.81
  -6  -5  10    5.21    0.96
   6  -5 -10    4.02    0.65
   6   5  10    5.23    0.75
   7  -5  10    0.31    0.72
  -7   5  10    1.70    1.00
   7   5 -10    2.37    0.57
  -7  -5  10    1.48    1.11
   7   5  10    1.70    0.71
   7  -5 -10    0.36    0.60
   8   5 -10    2.85    0.72
  -8   5  10    1.59    1.36
   8   5  10    3.21    0.90
   8  -5 -10    2.85    0.82
  -8  -5  10    0.03    1.24
   0   6  10    0.47    0.24
   0  -6  10   -0.66    0.38
   0  -6 -10    0.21    0.21
   0  -6  10    0.14    0.29
   0   6  10    0.22    0.37
   0   6 -10    0.40    0.27
   1  -6  10    4.99    0.64
  -1  -6 -10    6.73    0.44
  -1   6  10    6.27    0.58
  -1   6  10    5.89    0.47
   1   6 -10    5.05    0.46
   1  -6  10    6.16    0.50
   1  -6 -10    6.00    0.48
  -1   6 -10    6.56    0.51
   1   6  10    5.45    0.62
  -1  -6  10    6.26    0.67
   1   6  10    5.48    0.47
  -1  -6  10    4.95    0.55
   2  -6  10   15.71    1.13
  -2   6  10   16.14    0.99
   2   6 -10   16.72    0.96
  -2   6  10   18.16    1.12
  -2  -6  10   15.07    1.11
   2  -6 -10   16.72    1.02
   2   6  10   17.92    1.22
  -2   6 -10   16.28    1.02
  -2  -6  10   15.59    1.14
   3   6 -10    1.06    0.30
   3  -6  10    1.29    0.50
  -3   6  10    1.50    0.42
  -3   6  10    0.66    0.30
   3  -6 -10    1.10    0.36
  -3  -6  10    0.92    0.45
  -3  -6  10    1.16    0.55
  -3   6 -10    1.66    0.41
   4  -6  10    1.01    0.54
  -4   6  10    1.87    0.38
  -4   6  10    1.28    0.56
  -4  -6  10    0.59    0.61
   4   6  10    0.89    0.54
  -4  -6  10    1.88    0.58
   4  -6 -10    0.94    0.42
  -5   6  10    5.98    0.86
   5  -6  10    4.52    0.69
   5   6 -10    4.81    0.57
  -5  -6  10    3.81    0.91
   5   6  10    3.99    0.67
   5  -6 -10    5.21    0.66
   6   6 -10    2.05    0.51
  -6   6  10    0.45    0.82
   6  -6  10    0.36    0.60
   6  -6 -10    1.05    0.56
   6   6  10    1.01    0.62
  -6  -6  10   -0.36    0.90
   7  -6  10    2.58    0.87
   7   6 -10    2.84    0.65
  -7   6  10    2.84    1.09
   7  -6 -10    2.66    0.72
   7   6  10    2.71    0.78
  -7  -6  10    0.79    1.07
  -8   6  10    0.81    1.28
   8   6 -10    1.04    0.73
   8  -6  10    2.37    0.88
  -8  -6  10    1.75    1.33
   8  -6 -10    1.02    0.83
   8   6  10    0.45    0.74
   0   7  10   34.59    1.83
   0  -7 -10   33.25    1.80
   0   7 -10   33.66    1.82
   0   7  10   32.90    1.91
   0  -7  10   31.84    1.93
   1   7 -10    3.07    0.38
  -1   7  10    3.58    0.48
  -1   7  10    2.77    0.37
   1  -7  10    1.58    0.48
  -1  -7  10    2.19    0.46
   1   7  10    2.34    0.49
  -1   7 -10    3.17    0.42
   1  -7 -10    2.91    0.39
   1   7  10    2.99    0.37
  -1  -7  10    2.39    0.50
  -2   7  10    1.98    0.36
   2  -7  10    1.91    0.53
  -2   7  10    2.25    0.45
   2   7 -10    2.07    0.35
  -2  -7  10    2.16    0.52
  -2   7 -10    1.46    0.38
   2  -7 -10    2.51    0.41
   2   7  10    1.80    0.35
   2   7  10    1.99    0.51
  -2  -7  10    1.98    0.47
  -3   7  10    0.09    0.40
   3   7 -10    0.84    0.32
  -3   7  10    0.59    0.31
   3  -7  10    0.50    0.50
  -3   7 -10    1.81    0.40
  -3  -7  10    0.32    0.54
  -3  -7  10    0.24    0.73
   3  -7 -10    0.67    0.38
   3   7  10    0.42    0.52
  -4   7  10   20.03    1.23
   4  -7  10   21.23    1.39
  -4   7  10   19.14    1.38
   4   7 -10   20.28    1.21
   4   7  10   20.08    1.38
   4  -7 -10   17.65    1.29
  -4  -7  10   20.02    1.44
  -4  -7  10   20.70    1.57
   5   7 -10    0.44    0.43
  -5   7  10    0.14    0.64
   5  -7  10   -0.55    0.56
   5   7  10   -0.18    0.58
   5  -7 -10   -0.25    0.52
  -5  -7  10    0.74    0.75
   6  -7  10   -0.52    0.69
   6   7 -10    0.18    0.48
  -6   7  10    0.48    0.87
   6  -7 -10   -0.56    0.57
   6   7  10   -0.55    0.57
  -6  -7  10   -0.76    0.93
   7   7 -10    0.29    0.61
  -7   7  10    0.41    1.05
  -7  -7  10   -0.07    1.13
   7  -7 -10   -0.40    0.71
   7   7  10   -0.98    0.64
   0   8 -10    5.56    0.54
   0   8  10    5.14    0.56
   0   8  10    5.99    0.52
   0  -8  10    6.00    0.69
  -1   8  10    1.91    0.40
  -1   8  10    1.73    0.36
   1  -8  10    2.04    0.50
   1   8 -10    2.14    0.40
  -1   8 -10    2.88    0.43
   1   8  10    2.43    0.37
   1   8  10    1.98    0.47
   1  -8 -10    2.71    0.42
  -1  -8  10    2.80    0.57
   2   8 -10    7.90    0.61
  -2   8  10    7.74    0.61
   2  -8  10    7.16    0.78
  -2   8  10    7.78    0.71
  -2  -8  10    5.61    0.79
   2  -8 -10    6.12    0.62
   2   8  10    6.40    0.60
   2   8  10    5.55    0.74
  -2  -8  10    6.10    0.69
  -2   8 -10    6.57    0.63
  -3   8  10   -0.34    0.31
   3   8 -10   -0.13    0.33
   3  -8  10   -0.19    0.48
  -3   8 -10    0.32    0.43
   3   8  10   -0.06    0.55
  -3  -8  10    0.64    0.47
  -3  -8  10    0.15    0.59
   4  -8  10    5.29    0.77
   4   8 -10    6.39    0.60
  -4   8  10    6.97    0.85
  -4   8  10    7.42    0.65
  -4  -8  10    6.10    0.91
   4   8  10    4.60    0.73
  -4  -8  10    5.65    0.79
   4  -8 -10    6.01    0.71
  -4   8 -10    6.88    0.73
  -5   8  10    2.79    0.81
   5   8 -10    1.76    0.47
  -5   8  10    0.60    0.49
   5  -8  10    0.53    0.61
   5  -8 -10    1.66    0.61
  -5  -8  10    1.00    0.85
  -5  -8  10    1.38    0.67
   5   8  10    0.38    0.66
   6  -8  10    0.55    0.70
   6   8 -10    0.40    0.50
   6   8 -10    0.83    0.58
  -6   8  10   -0.14    0.90
   6  -8 -10   -0.73    0.65
   6   8  10   -0.48    0.63
  -7   8  10    1.72    1.19
   7   8 -10    1.21    0.70
   7  -8  10    1.93    0.87
   7  -8 -10    0.83    0.83
   7   8  10    0.19    0.81
   0   9  10    1.76    0.45
   0  -9  10    1.71    0.56
   0   9 -10    1.60    0.43
   1  -9  10   13.88    1.11
  -1   9  10   15.10    1.03
   1   9 -10   14.66    0.99
  -1   9  10   13.86    0.98
   1   9  10   14.43    0.95
  -1   9 -10   14.51    1.01
   1   9  10   13.95    1.12
   1  -9 -10   13.32    1.01
  -1  -9  10   15.03    1.11
   2  -9  10    2.08    0.56
   2   9 -10    1.16    0.43
  -2  -9  10    0.99    0.55
   2   9  10    0.54    0.55
   2   9  10    0.99    0.41
   2  -9 -10    0.98    0.48
  -2   9 -10    1.25    0.42
  -3   9  10    1.79    0.43
  -3   9  10    1.34    0.53
   3  -9  10    0.56    0.56
  -3  -9  10    2.05    0.63
   3  -9 -10    1.16    0.54
   3   9  10    0.62    0.62
   3   9  10    1.40    0.44
  -3   9 -10    1.44    0.51
  -4   9  10    2.52    0.72
   4  -9  10    1.89    0.69
  -4   9  10    1.46    0.48
   4   9 -10    1.83    0.48
  -4   9 -10    1.72    0.53
   4   9  10    2.35    0.73
   4  -9 -10    0.23    0.59
  -4  -9  10    2.39    0.68
   5  -9  10    1.30    0.76
   5   9 -10    1.89    0.55
   5   9 -10    2.40    0.96
  -5   9  10    3.58    0.63
  -5   9  10    1.42    0.82
   5  -9 -10    1.63    0.65
   5   9  10    1.61    0.70
  -5  -9  10    2.72    0.81
   6   9 -10    3.17    0.70
   6  -9  10    1.99    0.87
   6   9  10    1.10    1.30
   6  -9 -10    2.51    0.97
   7   9 -10    1.35    0.80
   7  -9  10    2.35    1.04
   7  -9 -10    1.04    0.81
   7   9  10    1.05    0.85
   0  10 -10    0.69    0.43
   0  10  10    0.81    0.43
   0  10  10    0.09    0.41
   0 -10  10    0.15    0.55
  -1  10  10    4.73    0.59
  -1  10  10    3.25    0.52
   1  10 -10    4.50    0.57
   1 -10  10    4.44    0.70
  -1 -10  10    4.67    0.71
   1  10  10    4.23    0.63
  -1  10 -10    2.75    0.55
   1  10  10    3.01    0.53
  -2  10  10    2.70    0.56
   2  10 -10    2.40    0.51
  -2  10  10    3.70    0.53
   2 -10  10    1.95    0.62
   2  10  10    3.19    0.53
  -2  10 -10    3.24    0.53
  -2 -10  10    2.77    0.67
   2  10  10    1.95    0.66
   2 -10 -10    3.53    0.63
   3  10 -10    2.54    0.55
  -3  10  10    3.14    0.54
  -3  10  10    3.45    0.67
   3 -10  10    4.35    0.80
  -3 -10  10    2.86    0.71
   3  10  10    5.35    0.82
   3  10  10    4.68    0.63
  -3  10 -10    4.72    0.62
   3 -10 -10    3.99    0.69
   4 -10  10    1.23    0.67
   4  10 -10    1.37    0.53
  -4  10  10    2.38    0.56
  -4  10  10    2.25    0.78
  -4  10 -10    2.30    0.63
   4  10  10    1.99    0.54
   4 -10 -10    1.46    0.68
  -4 -10  10    1.40    0.72
   4  10  10    1.47    0.76
   5  10 -10    1.01    0.58
  -5  10  10    1.65    0.60
  -5 -10  10    1.18    0.82
   5 -10 -10    1.56    0.76
   5  10  10    1.96    0.83
   6 -10  10    0.71    0.86
   6  10  10   -0.41    0.78
   6 -10 -10    0.04    0.85
   0  11  10    2.99    0.58
   0 -11  10    4.59    0.71
   0  11 -10    3.68    0.62
   0  11  10    3.63    0.60
   1 -11  10    1.26    0.58
  -1  11  10    2.09    0.53
   1  11 -10    1.87    0.57
  -1  11  10    2.41    0.54
   1  11  10    1.92    0.61
  -1 -11  10    2.77    0.69
  -1  11 -10    1.77    0.56
   1  11  10    1.46    0.48
   2  11 -10    1.25    0.55
   2 -11  10    2.12    0.74
  -2  11  10    2.61    0.60
  -2  11  10    3.60    0.58
   2  11  10    1.95    0.68
  -2 -11  10    1.42    0.65
  -2  11 -10    1.33    0.53
   2  11  10    2.28    0.51
  -3  11  10    0.75    0.49
   3  11 -10    1.08    0.56
   3 -11  10    1.28    0.75
   3  11  10    0.62    0.72
   3  11  10    1.09    0.50
  -3  11 -10    0.79    0.53
  -3 -11  10    1.59    0.72
   3 -11 -10    0.84    0.72
  -4  11  10    0.46    0.54
   4  11 -10   -0.46    0.57
   4  11  10   -0.83    0.76
   4  11  10   -0.21    0.54
   4 -11 -10    0.26    0.77
  -4 -11  10    0.00    0.78
  -4  11 -10    0.24    0.68
   5 -11  10    3.92    0.94
  -5  11  10    5.84    0.81
   5  11  10    4.63    0.78
  -5  11 -10    3.56    0.83
   5 -11 -10    1.28    0.92
   5  11  10    3.63    1.05
   0  12 -10    0.72    0.58
   0  12  10    1.30    0.56
   0 -12  10    0.77    0.70
   1 -12  10    0.23    0.69
  -1  12  10   -0.18    0.50
   1  12 -10    0.40    0.57
  -1 -12  10    0.35    0.71
  -1  12 -10   -0.15    0.52
   1  12  10    0.24    0.56
   1  12  10    0.09    0.55
  -2  12  10    1.23    0.57
   2 -12  10    2.37    0.82
   2  12 -10    1.00    0.60
  -2  12 -10    1.09    0.65
   2  12  10    1.07    0.59
  -2 -12  10    1.41    0.75
   2  12  10    1.07    0.65
   3 -12  10    0.03    1.41
   3  12 -10    0.82    0.62
  -3  12  10    0.19    0.55
   3  12  10    0.96    0.79
  -3  12 -10    0.70    0.59
  -3 -12  10    1.40    0.80
   3  12  10    0.50    0.54
   4 -12  10    1.20    0.91
  -4  12  10    1.64    0.61
   4  12 -10    1.79    0.70
   4  12  10    1.52    0.90
   4  12  10    2.55    0.72
  -4  12 -10    1.88    0.72
   0  13 -10    0.36    0.68
   0 -13  10    2.72    0.85
   0  13  10    0.37    0.60
   1  13 -10    4.82    0.78
   1 -13  10    6.32    1.00
  -1  13  10    5.58    0.73
  -1  13 -10    6.24    0.86
   1  13  10    5.71    0.82
  -1 -13  10    5.59    0.97
  -2  13  10    2.83    0.69
   2 -13  10    2.13    0.83
   2  13 -10    2.41    0.74
  -2 -13  10    2.34    0.87
   2  13  10    1.82    0.77
  -2  13 -10    2.57    0.80
   3 -13  10    7.90    1.15
   3  13 -10    6.62    0.93
  -3  13  10    7.54    0.84
  -3  13 -10    6.92    0.92
   3  13  10    6.76    0.87
   0 -14  10    9.69    1.20
   0  14 -10    8.93    0.99
   0  14  10   10.06    0.99
  -1  14  10    7.66    0.95
   1  14 -10    9.82    1.03
   1 -14  10    7.41    1.12
  -1  14 -10    7.42    0.94
   1  14  10    7.06    0.98
   0   0  11   -0.18    0.22
   0   0  11    0.27    0.30
   1   0  11   24.32    1.42
   1   0  11   25.14    1.40
  -1   0  11   23.17    1.43
   1   0  11   24.97    1.29
  -1   0  11   25.27    1.40
   2   0  11    0.05    0.27
   2   0  11    0.91    0.34
   2   0  11    0.45    0.24
  -2   0  11    0.58    0.35
  -2   0  11    0.30    0.37
  -3   0  11    1.43    0.47
   3   0  11    0.68    0.40
   3   0  11    0.98    0.33
   3   0 -11    0.63    0.26
  -4   0  11   20.78    1.40
   4   0  11   20.41    1.26
   4   0 -11   19.35    1.20
   4   0  11   19.56    1.24
   5   0  11    1.11    0.55
   5   0  11    1.65    0.43
  -5   0  11    2.13    0.66
   5   0 -11    1.34    0.39
  -6   0  11    0.17    0.68
   6   0  11   -0.02    0.50
   6   0 -11    0.25    0.37
   6   0  11    0.30    0.47
   7   0 -11    2.19    0.52
  -7   0  11    3.07    1.01
   7   0  11    1.78    0.63
  -8   0  11   15.74    1.71
   8   0  11   18.89    1.47
   8   0 -11   16.38    1.40
   0  -1  11   16.22    0.99
   0   1  11   17.00    1.00
   0  -1  11   17.35    1.03
   0   1  11   15.19    1.02
   1  -1  11   14.05    0.92
  -1   1  11   14.01    0.92
   1  -1  11   14.98    0.93
   1  -1  11   15.08    0.80
  -1   1  11   14.65    0.96
  -1  -1  11   14.55    0.91
   1   1  11   14.27    0.92
   1   1  11   15.70    0.96
  -1  -1  11   13.91    0.98
   2  -1  11    5.63    0.54
   2  -1  11    5.48    0.41
   2  -1  11    5.88    0.52
  -2   1  11    5.27    0.57
  -2  -1  11    6.10    0.57
   2   1  11    5.10    0.54
   2   1  11    5.26    0.48
   2  -1 -11    4.96    0.46
  -2  -1  11    6.96    0.61
  -3   1  11   10.39    0.91
   3  -1  11    8.92    0.78
   3  -1  11   11.44    0.82
   3   1 -11   11.05    0.75
   3   1  11   11.51    0.86
   3   1  11   11.46    0.78
   3  -1 -11   11.31    0.77
  -3  -1  11   12.40    0.92
   4  -1  11    1.37    0.41
   4   1 -11    2.03    0.36
   4  -1  11    2.23    0.44
  -4   1  11    2.01    0.53
   4   1  11    2.17    0.45
  -4  -1  11    2.48    0.62
   4  -1 -11    2.67    0.38
   4   1  11    2.60    0.40
  -5   1  11    1.89    0.64
   5  -1  11    2.61    0.51
   5   1 -11    3.12    0.47
   5  -1  11    1.13    0.47
   5   1  11    3.14    0.52
  -5  -1  11    3.47    0.75
   5  -1 -11    4.07    0.50
   5   1  11    3.35    0.46
   6   1 -11    5.31    0.62
  -6   1  11    7.74    0.99
   6  -1  11    5.86    0.70
   6  -1  11    7.36    0.75
   6  -1 -11    6.33    0.66
  -6  -1  11    7.03    1.03
   6   1  11    5.98    0.75
  -7   1  11    5.82    1.09
   7   1 -11    7.85    0.81
   7  -1  11    7.88    0.87
   7  -1  11    6.03    0.80
   7  -1 -11    6.86    0.77
  -7  -1  11    8.50    1.22
   7   1  11    5.19    0.78
  -8   1  11    1.41    1.05
   8   1 -11    1.89    0.67
   8  -1  11    0.72    0.67
  -8  -1  11    1.61    1.18
   8   1  11    1.10    0.76
   0  -2  11   11.07    0.82
   0   2  11   10.75    0.76
   0   2  11   11.37    0.60
   0   2  11   10.44    0.78
   0  -2  11   11.13    0.73
  -1   2  11    7.58    0.42
   1  -2  11    7.89    0.58
   1  -2  11    7.23    0.47
   1  -2  11    7.22    0.63
  -1   2  11    7.16    0.59
  -1  -2  11    6.40    0.62
   1   2  11    7.44    0.60
  -1  -2  11    7.98    0.64
   1   2  11    8.45    0.68
   1  -2 -11    7.07    0.54
   2  -2  11   15.29    0.88
   2  -2  11   15.29    0.96
  -2   2  11   15.92    1.02
   2   2 -11   14.96    0.78
   2  -2  11   14.59    0.99
  -2  -2 -11   13.89    0.97
   2   2  11   14.06    0.90
   2   2  11   15.21    1.06
  -2  -2  11   15.91    1.04
   2  -2 -11   13.72    0.89
  -2  -2  11   15.97    1.05
   3  -2  11    4.78    0.54
   3  -2  11    2.96    0.47
  -3   2  11    4.26    0.57
  -3  -2  11    4.26    0.60
   3  -2 -11    3.61    0.42
   3   2  11    3.56    0.55
   3   2  11    3.96    0.40
  -3  -2  11    3.21    0.58
   4  -2  11    0.35    0.39
  -4   2  11    0.14    0.49
   4   2 -11    0.24    0.28
   4  -2  11    0.41    0.40
   4   2  11    0.21    0.29
   4   2  11   -0.06    0.39
   4  -2 -11    0.26    0.31
  -4  -2  11   -0.23    0.54
  -5   2  11   41.19    2.38
   5  -2  11   40.05    2.22
   5  -2  11   38.93    2.19
   5   2 -11   37.32    2.17
  -5  -2  11   36.48    2.42
   5  -2 -11   38.16    2.18
   5   2  11   38.41    2.24
   6  -2  11    0.96    0.52
   6  -2  11    1.13    0.53
   6   2 -11    1.62    0.44
  -6   2  11    1.37    0.72
   6  -2 -11    1.56    0.45
  -6  -2  11    1.55    0.76
   6   2  11    1.41    0.52
   7   2 -11    1.51    0.55
   7  -2  11    1.00    0.62
   7  -2  11    1.49    0.66
  -7   2  11    0.79    0.84
   7  -2 -11    1.26    0.57
  -7  -2  11    1.38    0.90
   7   2  11    0.99    0.64
   8   2 -11    3.71    0.68
  -8   2  11    2.07    1.16
   8  -2  11    2.44    0.81
   8  -2 -11    3.95    0.78
  -8  -2  11    3.21    1.26
   0  -3 -11    3.36    0.33
   0   3  11    3.51    0.27
   0   3  11    3.31    0.44
   0  -3  11    3.11    0.47
   0   3 -11    3.50    0.28
   0  -3  11    3.20    0.36
   1   3 -11    1.49    0.17
  -1  -3 -11    1.34    0.33
   1  -3  11    1.00    0.22
   1  -3  11    1.06    0.25
   1  -3  11    1.24    0.38
  -1   3  11    0.64    0.30
  -1   3  11    1.27    0.17
   1   3  11    0.89    0.37
  -1  -3  11    1.30    0.33
   1  -3 -11    1.19    0.24
  -1  -3  11    0.86    0.36
  -2   3  11    4.59    0.52
   2  -3  11    4.18    0.53
  -2   3  11    4.18    0.31
   2   3 -11    4.17    0.31
   2  -3  11    3.47    0.41
   2   3  11    4.38    0.55
   2  -3 -11    3.76    0.41
  -2  -3  11    3.66    0.51
  -2  -3  11    4.15    0.55
   2   3  11    3.94    0.39
   3  -3  11    7.06    0.62
  -3   3  11    6.93    0.70
   3  -3  11    5.99    0.66
   3  -3 -11    7.00    0.59
   3   3  11    8.55    0.57
  -3  -3  11    8.19    0.81
  -3  -3  11    8.14    0.75
   3   3  11    8.15    0.74
   4  -3  11    7.78    0.75
   4  -3  11    9.57    0.74
   4   3 -11   10.01    0.80
  -4  -3  11    9.24    0.93
   4  -3 -11    8.24    0.75
   5  -3  11    0.05    0.43
   5  -3  11    0.14    0.50
  -5   3  11   -0.39    0.53
   5   3 -11   -0.12    0.34
   5  -3 -11    0.39    0.34
   5   3  11    0.41    0.49
  -5  -3  11    0.27    0.66
   6  -3  11    3.47    0.64
   6   3 -11    4.36    0.59
  -6   3  11    5.18    0.95
  -6  -3  11    4.20    0.89
   6   3  11    3.22    0.61
   6  -3 -11    3.45    0.56
   7   3 -11   -0.46    0.46
  -7   3  11    0.74    0.94
   7  -3  11   -0.52    0.58
   7  -3  11   -0.05    0.62
   7   3  11   -0.01    0.56
  -7  -3  11    0.21    0.97
   7  -3 -11    0.09    0.49
   8  -3  11    1.27    0.82
   8   3 -11    1.51    0.66
  -8   3  11    0.52    1.05
   8  -3 -11    1.37    0.66
   8   3  11    1.54    0.81
  -8  -3  11    0.71    1.24
   0   4  11   10.90    0.65
   0   4 -11   11.05    0.66
   0  -4 -11   10.39    0.68
   0  -4  11   11.28    0.73
   0  -4  11   12.02    0.84
   0   4  11   10.89    0.81
  -1   4  11    5.52    0.54
   1   4 -11    4.55    0.35
  -1   4  11    5.14    0.36
   1  -4  11    3.98    0.51
  -1  -4 -11    5.50    0.41
   1  -4  11    5.29    0.41
  -1  -4  11    3.57    0.49
   1   4  11    4.09    0.53
  -1  -4  11    3.90    0.53
   1   4  11    4.87    0.38
   1  -4 -11    4.81    0.41
  -1   4 -11    4.69    0.44
  -2   4  11   75.69    3.88
   2  -4  11   73.72    3.98
  -2   4  11   75.79    3.98
   2   4 -11   75.43    3.85
   2  -4  11   76.96    3.89
  -2  -4  11   74.70    4.00
  -2  -4  11   76.12    4.02
   2  -4 -11   72.47    3.91
   2   4  11   75.46    4.00
  -3   4  11    3.39    0.35
   3  -4  11    3.18    0.42
  -3   4  11    2.73    0.51
   3   4 -11    3.43    0.33
   3  -4  11    3.17    0.52
   3   4  11    4.02    0.58
   3  -4 -11    3.47    0.43
  -3  -4  11    2.80    0.61
  -3  -4  11    2.51    0.57
   4  -4  11   21.23    1.43
   4  -4  11   21.17    1.26
  -4   4  11   17.90    1.37
   4   4  11   20.82    1.39
  -4  -4  11   19.19    1.41
   4  -4 -11   20.49    1.24
  -4  -4  11   20.75    1.46
  -5   4  11    7.26    0.92
   5  -4  11    7.23    0.78
   5  -4  11    5.79    0.66
   5   4 -11    8.79    0.73
  -5  -4  11    6.19    0.96
   5  -4 -11    8.11    0.73
   5   4  11    5.51    0.77
   6  -4  11    5.64    0.78
   6   4 -11    3.49    0.55
   6  -4  11    5.43    0.66
  -6   4  11    4.73    0.90
   6   4  11    3.95    0.68
  -6  -4  11    3.08    0.95
   6  -4 -11    4.76    0.66
  -7   4  11    1.97    1.04
   7   4 -11    1.29    0.54
   7  -4  11    1.25    0.68
   7  -4 -11    1.17    0.61
   7   4  11    0.74    0.63
  -7  -4  11    1.95    0.97
   8   4 -11    1.95    0.78
  -8   4  11    3.37    1.32
   8  -4  11    3.70    0.90
  -8  -4  11    1.64    1.33
   8   4  11    1.48    0.83
   8  -4 -11    3.82    0.83
   0  -5  11   36.08    1.93
   0   5  11   33.39    1.78
   0   5  11   34.34    1.90
   0   5 -11   32.72    1.78
   0  -5  11   32.59    1.84
   0  -5 -11   32.72    1.79
  -1   5  11   24.80    1.37
  -1   5  11   25.97    1.51
  -1  -5 -11   27.89    1.37
   1  -5  11   23.54    1.51
   1  -5 -11   24.74    1.42
   1   5  11   24.57    1.39
  -1   5 -11   25.31    1.40
  -1  -5  11   25.30    1.50
   1   5  11   25.18    1.54
  -1  -5  11   24.54    1.53
   2   5 -11   25.00    1.28
  -2   5  11   23.66    1.28
   2  -5  11   22.36    1.44
  -2   5  11   21.71    1.40
  -2  -5  11   23.87    1.50
  -2   5 -11   22.63    1.34
   2   5  11   23.00    1.51
  -2  -5  11   24.60    1.50
   2  -5 -11   22.41    1.34
   3  -5  11    7.45    0.71
   3   5 -11    7.61    0.53
   3  -5  11    7.45    0.59
  -3   5  11    7.90    0.55
  -3   5  11    5.19    0.65
  -3  -5  11    5.61    0.77
   3  -5 -11    6.11    0.59
  -3  -5  11    6.82    0.74
  -4   5  11   13.16    1.09
   4  -5  11   11.32    0.95
   4  -5  11   13.58    1.05
  -4  -5  11   13.12    1.17
   4  -5 -11   13.19    0.94
  -4  -5  11   12.78    1.08
   4   5  11   12.13    1.03
  -5   5  11    4.28    0.78
   5   5 -11    3.30    0.52
   5  -5  11    3.90    0.67
   5  -5 -11    3.37    0.56
  -5  -5  11    2.67    0.75
   5   5  11    3.64    0.63
   6   5 -11   14.55    1.17
   6  -5  11   14.72    1.25
  -6   5  11   17.23    1.53
   6   5  11   16.00    1.31
   6  -5 -11   16.66    1.26
  -6  -5  11   20.84    1.64
   7   5 -11    8.47    0.87
  -7   5  11    8.18    1.30
   7  -5  11    9.01    1.06
   7  -5 -11    5.50    0.90
   7   5  11    8.42    0.97
  -7  -5  11    9.04    1.40
   8  -5  11    0.53    0.88
  -8   5  11    0.45    1.25
   8   5  11    0.10    0.81
  -8  -5  11    0.70    1.17
   8  -5 -11   -0.30    0.69
   0   6  11   25.67    1.36
   0   6 -11   24.17    1.37
   0   6  11   23.62    1.46
   0  -6 -11   24.74    1.35
   0  -6  11   23.18    1.50
  -1   6  11   19.29    1.15
  -1  -6 -11   19.96    1.01
   1   6 -11   16.79    1.05
   1  -6  11   17.70    1.05
   1  -6  11   14.94    1.18
  -1   6  11   16.79    1.05
   1   6  11   20.65    1.08
   1  -6 -11   16.95    1.07
   1   6  11   19.80    1.23
  -1  -6  11   17.89    1.18
  -1   6 -11   17.08    1.06
  -1  -6  11   17.52    1.24
   2   6 -11   10.03    0.71
  -2   6  11    9.38    0.82
  -2   6  11    9.82    0.71
   2  -6 -11   11.74    0.77
  -2   6 -11   11.88    0.81
  -2  -6  11   10.31    0.87
  -2  -6  11   10.15    0.89
   2   6  11   11.90    0.96
   3  -6  11   -0.13    0.43
   3   6 -11    0.14    0.28
  -3   6  11    0.56    0.46
  -3   6  11    0.00    0.26
   3   6  11   -0.20    0.44
   3  -6 -11   -0.14    0.31
  -3  -6  11    0.07    0.53
  -3   6 -11   -0.09    0.37
  -3  -6  11    0.17    0.45
  -4   6  11   10.86    0.80
   4  -6  11   10.69    0.92
   4   6 -11   11.53    0.76
  -4   6  11    9.20    0.92
  -4  -6  11   10.18    1.06
   4   6  11    9.94    0.94
  -4  -6  11    9.62    0.96
   4  -6 -11    8.44    0.79
   5   6 -11   10.55    0.89
  -5   6  11   11.33    1.13
   5  -6  11   11.95    1.06
  -5  -6  11   11.77    1.24
   5  -6 -11   11.48    0.97
   5   6  11   10.24    1.03
   6  -6  11    0.99    0.67
  -6   6  11    2.37    0.90
   6   6 -11    1.58    0.55
   6   6  11    0.92    0.61
  -6  -6  11    1.39    0.91
   6  -6 -11    2.72    0.65
  -7   6  11    0.73    1.08
   7   6 -11    0.60    0.59
   7  -6  11    1.15    0.83
   7   6  11    0.19    0.76
   7  -6 -11    1.07    1.17
  -7  -6  11    2.64    1.09
   8   6 -11    1.00    0.73
  -8   6  11    1.99    1.36
   8  -6  11    1.54    0.94
   8  -6 -11    1.06    0.82
   8   6  11    1.67    0.91
  -8  -6  11    1.23    1.25
   0   7  11    0.77    0.29
   0  -7 -11    0.98    0.30
   0   7  11    0.86    0.43
   0  -7  11    1.19    0.53
   0   7 -11    1.38    0.34
  -1   7  11    5.05    0.46
   1  -7  11    4.12    0.58
   1   7 -11    3.80    0.45
  -1   7  11    3.58    0.52
  -1   7 -11    4.34    0.48
   1   7  11    5.93    0.49
   1  -7 -11    4.60    0.48
   1   7  11    5.28    0.61
  -1  -7  11    5.42    0.88
  -1  -7  11    4.85    0.58
   2  -7  11   26.37    1.68
  -2   7  11   28.09    1.65
  -2   7  11   28.72    1.53
   2   7 -11   26.68    1.53
  -2   7 -11   28.22    1.57
  -2  -7  11   27.04    1.70
   2  -7 -11   27.41    1.57
  -2  -7  11   26.00    1.67
   2   7  11   27.25    1.55
   2   7  11   26.18    1.70
  -3   7  11   16.42    1.28
  -3   7  11   17.02    1.10
   3  -7  11   20.38    1.35
   3   7 -11   17.84    1.12
   3   7  11   18.66    1.32
  -3   7 -11   19.85    1.19
  -3  -7  11   16.88    1.33
  -3  -7  11   18.91    1.40
   3  -7 -11   18.51    1.25
  -4   7  11    3.30    0.67
   4   7 -11    3.27    0.47
   4  -7  11    3.67    0.65
  -4   7  11    2.96    0.48
   4   7  11    5.71    0.76
   4  -7 -11    4.30    0.60
  -4  -7  11    3.07    0.68
   5  -7  11   15.95    1.23
   5   7 -11   15.03    1.11
  -5   7  11   14.76    1.33
   5  -7 -11   13.96    1.12
   5   7  11   12.88    1.16
  -5  -7  11   12.08    1.34
  -6   7  11   -0.67    0.88
   6   7 -11   -0.07    0.51
   6  -7  11    0.04    0.71
   6   7  11   -0.72    0.68
   6  -7 -11   -0.01    0.63
  -6  -7  11    0.63    0.97
   7  -7  11    3.25    0.93
   7   7 -11    3.07    0.70
  -7   7  11    4.86    1.27
  -7  -7  11    3.08    1.34
   7   7  11    2.92    0.84
   7  -7 -11    2.44    0.80
   0   8 -11    7.96    0.66
   0   8  11    8.93    0.67
   0  -8  11    8.43    0.83
   1   8 -11    5.08    0.53
   1  -8  11    5.11    0.65
  -1   8  11    6.15    0.54
  -1  -8  11    6.20    0.74
   1   8  11    5.33    0.67
   1  -8 -11    5.35    0.54
  -1   8 -11    4.26    0.52
   1   8  11    5.54    0.53
  -2   8  11    6.65    0.57
   2   8 -11    5.40    0.56
   2  -8  11    5.25    0.74
  -2   8  11    7.43    0.70
   2  -8 -11    5.63    0.60
  -2  -8  11    5.14    0.68
   2   8  11    6.09    0.64
   2   8  11    4.93    0.69
  -2   8 -11    5.96    0.59
  -3   8  11    2.57    0.42
   3  -8  11    2.33    0.66
   3   8 -11    3.30    0.46
  -3   8  11    3.04    0.60
   3  -8 -11    1.66    0.49
  -3  -8  11    2.95    0.72
  -3  -8  11    3.05    0.63
   3   8  11    2.32    0.66
  -3   8 -11    3.71    0.54
   3   8  11    2.30    0.41
  -4   8  11    7.15    0.69
   4   8 -11    8.51    0.70
  -4   8  11    7.11    0.89
   4  -8  11    7.84    0.90
   4   8  11    7.62    0.90
  -4  -8  11    8.51    1.14
   4  -8 -11    6.28    0.77
  -4  -8  11    7.97    0.92
   5  -8  11   -0.36    0.67
  -5   8  11    0.41    0.72
  -5   8  11    0.76    0.51
  -5  -8  11   -0.12    0.66
   5  -8 -11    0.17    0.60
   5   8  11    0.58    0.70
  -5  -8  11    0.13    0.85
   6   8 -11    4.17    0.70
  -6   8  11    3.98    1.09
   6  -8  11    4.78    1.06
  -6  -8  11    5.24    1.22
   6   8  11    3.86    0.93
   6  -8 -11    3.77    0.84
   7  -8  11    4.26    1.02
  -7   8  11    4.08    1.43
   7  -8 -11    5.09    0.92
   7   8  11    3.75    1.00
   0  -9  11    7.79    0.85
   0   9 -11    7.73    0.69
   0   9  11    9.46    0.81
  -1   9  11    6.38    0.65
   1  -9  11    4.88    0.69
  -1   9  11    5.64    0.64
   1   9 -11    6.14    0.61
   1   9  11    4.73    0.65
  -1  -9  11    6.69    0.74
   1   9  11    5.14    0.57
  -1   9 -11    5.20    0.60
  -2   9  11    7.86    0.75
  -2   9  11    7.18    0.75
   2   9 -11    8.37    0.69
   2  -9  11    7.50    0.83
   2  -9 -11    8.81    0.76
   2   9  11    7.23    0.68
  -2  -9  11    7.52    0.82
   2   9  11    8.06    0.83
  -2   9 -11    7.09    0.71
  -3   9  11    0.26    0.39
   3  -9  11    0.22    0.61
  -3   9  11    0.15    0.53
  -3  -9  11   -0.43    0.59
   3   9  11   -0.18    0.62
  -3   9 -11    0.42    0.45
   3  -9 -11   -0.02    0.49
   3   9  11    0.65    0.43
   4  -9  11    1.00    0.68
  -4   9  11    0.87    0.69
  -4   9  11    0.50    0.46
   4   9 -11    0.67    0.48
  -4   9 -11    0.82    0.56
  -4  -9  11    0.60    0.69
   4   9  11    0.14    0.68
   4  -9 -11   -0.31    0.57
   5  -9  11    1.26    0.74
  -5   9  11    1.53    0.57
  -5   9  11    1.46    0.83
   5  -9 -11    1.45    0.63
   5   9  11    1.42    0.79
  -5  -9  11    2.01    0.80
   6  -9  11    6.36    1.01
  -6   9  11   10.19    1.39
   6   9  11    6.47    1.07
   6  -9 -11    7.60    1.06
   0  10  11    0.58    0.45
   0  10 -11    0.01    0.46
   0 -10  11    0.12    0.59
   0  10  11    0.21    0.42
   1  10 -11    1.19    0.47
  -1  10  11    1.35    0.44
  -1  10  11    2.04    0.51
   1 -10  11    1.28    0.56
  -1  10 -11    1.26    0.47
   1  10  11    1.12    0.55
   1  10  11    1.44    0.48
  -1 -10  11    1.56    0.64
   2 -10  11    4.13    0.71
   2  10 -11    2.67    0.57
  -2  10  11    2.86    0.54
  -2  10  11    5.10    0.67
  -2 -10  11    4.68    0.77
   2  10  11    3.65    0.55
   2  10  11    2.62    0.63
  -2  10 -11    3.51    0.61
  -3  10  11    6.80    0.67
   3 -10  11    6.75    0.91
  -3  10  11    7.05    0.81
   3  10 -11    5.62    0.68
  -3  10 -11    6.05    0.73
   3  10  11    6.11    0.92
   3 -10 -11    6.11    0.80
   3  10  11    5.81    0.69
  -3 -10  11    6.01    0.87
   4 -10  11    5.12    0.85
  -4  10  11    4.53    0.65
  -4  10  11    5.35    0.92
  -4  10 -11    4.81    0.76
  -4 -10  11    6.03    0.93
   4  10  11    4.68    0.65
   4 -10 -11    4.99    0.84
   4  10  11    4.40    0.90
   5 -10  11    1.37    0.86
  -5  10  11    2.62    0.68
   5 -10 -11    1.45    0.78
  -5 -10  11    2.86    0.89
   5  10  11    3.58    1.02
   6 -10  11    0.93    0.94
   6  10  11   -0.77    0.90
   6 -10 -11    0.55    0.86
   0  11 -11   -0.27    0.49
   0 -11  11    1.02    0.68
   0  11  11    0.35    0.48
   0  11  11    1.15    0.52
  -1  11  11    1.20    0.53
   1  11 -11    1.17    0.56
  -1  11  11    0.13    0.47
   1 -11  11    1.67    0.62
   1  11  11    1.45    0.52
  -1  11 -11    1.32    0.56
  -1 -11  11    1.08    0.66
   1  11  11    0.99    0.55
   2 -11  11    0.56    0.64
  -2  11  11    1.04    0.59
  -2  11  11    1.42    0.54
   2  11 -11    0.39    0.55
  -2  11 -11    0.03    0.49
   2  11  11    1.20    0.66
   2  11  11    1.28    0.54
  -2 -11  11    1.32    0.67
  -3  11  11   11.41    0.92
   3  11 -11   11.94    0.99
   3 -11  11   10.83    1.13
  -3  11 -11   10.19    0.97
   3  11  11   10.56    1.16
  -3 -11  11   11.27    1.16
   3  11  11   11.59    0.99
  -4  11  11    3.92    0.66
   4 -11  11    3.27    0.86
   4  11  11    3.47    0.92
   4  11  11    3.87    0.72
   4 -11 -11    2.45    0.88
  -4 -11  11    3.90    0.93
  -4  11 -11    3.00    0.71
  -5  11  11    3.09    0.76
   5 -11  11    2.24    0.99
   5  11  11    2.29    0.90
   5  11  11    3.58    0.70
   0 -12  11    1.24    0.76
   0  12  11    0.63    0.56
   0  12 -11    0.83    0.63
   0  12  11   -0.17    0.53
   1  12 -11    4.84    0.74
   1 -12  11    5.83    0.90
  -1  12  11    3.73    0.67
  -1 -12  11    6.33    0.94
  -1  12 -11    5.29    0.75
   1  12  11    4.42    0.74
   1  12  11    6.81    0.76
   2 -12  11    1.70    0.80
  -2  12  11    1.60    0.58
   2  12 -11    0.79    0.64
   2  12  11    1.44    0.61
   2  12  11    0.97    0.67
  -2 -12  11    1.44    0.76
  -2  12 -11    1.89    0.68
   3  12 -11    0.17    1.05
  -3  12  11    0.22    0.54
   3 -12  11   -0.76    0.73
  -3 -12  11    0.15    0.83
   3  12  11    0.63    0.68
  -3  12 -11   -0.46    0.66
   3  12  11    0.16    0.75
  -4  12  11    0.49    0.61
   4 -12  11   -0.20    0.88
   4  12  11   -1.33    0.83
   4  12  11    0.76    0.65
  -4  12 -11   -0.04    0.77
   0  13  11    0.01    0.62
   0  13 -11   -0.26    0.69
   0 -13  11    0.01    0.87
  -1  13  11    3.10    0.70
   1  13 -11    2.69    0.72
   1 -13  11    2.66    0.86
   1  13  11    2.07    0.71
  -1 -13  11    2.76    0.90
  -1  13 -11    1.29    0.72
  -2  13  11    1.40    0.76
   2 -13  11    1.31    0.78
   2  13 -11    0.18    0.74
   2  13  11    2.73    0.73
  -2 -13  11    1.89    0.90
   3 -13  11    2.30    1.00
  -3  13  11    0.83    0.67
  -3  13 -11    1.03    0.78
   3  13  11    0.43    0.70
   0   0  12    1.07    0.32
   0   0  12    0.99    0.34
   1   0  12   38.77    2.13
  -1   0  12   40.49    2.17
   1   0  12   39.95    2.14
  -1   0  12   38.72    2.12
   1   0  12   37.53    2.00
  -2   0  12    7.27    0.67
   2   0  12    7.64    0.66
  -2   0  12    6.99    0.67
   2   0  12    6.77    0.59
   3   0  12    1.20    0.37
   3   0  12    2.29    0.45
  -3   0  12    0.97    0.47
   3   0 -12    1.35    0.31
   4   0  12   -0.15    0.35
   4   0 -12   -0.05    0.30
   4   0  12   -0.33    0.41
  -4   0  12    0.11    0.49
   5   0 -12    1.16    0.40
   5   0  12    0.08    0.43
   5   0  12    0.80    0.45
  -5   0  12   -0.04    0.57
   6   0 -12   15.55    1.09
   6   0  12   15.73    1.24
  -6   0  12   14.56    1.38
   6   0  12   14.76    1.15
  -7   0  12   31.05    2.41
   7   0  12   31.69    2.04
   7   0 -12   31.23    1.96
   8   0  12   -0.22    0.72
  -8   0  12    0.98    1.17
   8   0 -12    0.56    0.64
   0   1  12   16.51    1.12
   0  -1  12   19.59    1.15
   0  -1  12   16.57    1.06
   0   1  12   18.55    1.08
   1  -1  12   13.54    0.73
  -1   1  12   14.04    0.93
   1  -1  12   12.53    0.87
   1  -1  12   12.78    0.91
  -1   1  12   12.84    0.87
   1   1  12   12.99    0.89
  -1  -1  12   13.38    0.87
   1   1  12   12.47    0.89
  -1  -1  12   13.55    0.97
   2  -1  12    7.34    0.63
   2  -1  12    7.52    0.62
  -2   1  12    7.93    0.67
  -2  -1  12    7.44    0.73
   2   1  12    8.43    0.65
   2  -1 -12    6.34    0.56
  -2  -1  12    7.60    0.69
   2   1  12    8.04    0.71
   3  -1  12    5.62    0.55
  -3   1  12    4.80    0.61
   3   1 -12    5.27    0.51
   3  -1  12    5.44    0.60
   3  -1 -12    4.80    0.49
  -3  -1  12    5.29    0.64
   3   1  12    5.31    0.51
  -3  -1  12    3.70    0.59
   3   1  12    5.13    0.59
   4  -1  12    5.22    0.61
   4  -1  12    7.88    0.66
  -4   1  12    5.85    0.75
   4   1 -12    7.97    0.64
   4   1  12    6.73    0.58
   4   1  12    6.56    0.70
   4  -1 -12    5.63    0.57
   5  -1  12   15.23    1.10
  -5   1  12   13.58    1.27
   5   1 -12   16.26    1.07
  -5  -1  12   15.48    1.35
   5  -1 -12   14.41    1.02
   5   1  12   14.97    1.04
   5   1  12   14.23    1.16
  -6   1  12   11.17    1.18
   6  -1  12    8.01    0.88
   6   1 -12   10.58    0.85
   6   1  12   10.26    0.93
   6  -1 -12   10.75    0.90
  -6  -1  12    9.64    1.17
  -7   1  12    2.23    0.94
   7  -1  12    1.70    0.70
   7   1 -12    2.48    0.62
   7   1  12    2.06    0.71
  -7  -1  12    3.75    1.03
   7  -1 -12    1.74    0.59
   8  -1  12    1.74    0.80
   8   1 -12    2.05    0.68
  -8   1  12    3.49    1.23
  -8  -1  12    1.82    1.14
   8  -1 -12    1.70    0.71
   0   2  12    0.50    0.33
   0   2  12    1.20    0.37
   0   2  12    0.33    0.12
   0  -2  12    0.14    0.36
   0  -2  12    0.85    0.28
  -1   2  12    0.63    0.34
   1  -2  12    1.00    0.35
   1  -2  12    0.77    0.27
  -1  -2  12    1.28    0.42
   1   2  12    1.21    0.33
   1   2  12    0.78    0.35
   1  -2 -12    0.84    0.25
  -1  -2  12    1.00    0.33
   2  -2  12   37.49    2.03
  -2   2  12   35.24    2.06
   2  -2  12   36.02    2.05
   2   2  12   37.05    1.99
  -2  -2  12   35.30    2.07
   2   2  12   36.14    2.10
  -2  -2  12   39.03    2.11
   2  -2 -12   37.04    2.00
  -3   2  12   19.28    1.34
   3  -2  12   20.26    1.28
   3  -2  12   20.19    1.30
   3   2  12   20.95    1.33
   3   2  12   21.71    1.20
  -3  -2  12   20.83    1.42
  -3  -2  12   20.70    1.35
   3  -2 -12   19.74    1.21
  -4   2  12   32.01    1.88
   4  -2  12   28.97    1.71
   4   2 -12   29.37    1.68
   4  -2  12   27.22    1.70
   4  -2 -12   26.75    1.65
   4   2  12   29.86    1.62
   5  -2  12    1.74    0.50
   5  -2  12    1.75    0.52
   5   2 -12    2.77    0.47
  -5   2  12    2.13    0.66
   5   2  12    1.65    0.57
   5  -2 -12    2.10    0.43
  -5  -2  12    2.56    0.79
   6  -2  12    1.51    0.59
  -6   2  12    2.30    0.87
   6  -2  12    2.51    0.58
   6   2 -12    2.69    0.53
   6   2  12    2.73    0.67
  -6  -2  12    2.19    0.83
   6  -2 -12    1.86    0.52
   7  -2  12    1.20    0.69
   7   2 -12    1.65    0.58
   7  -2  12    1.67    0.67
  -7   2  12    0.88    0.87
   7   2  12    1.27    0.64
   7  -2 -12    1.80    0.60
  -7  -2  12    0.55    0.99
  -8   2  12   -0.16    1.19
   8   2 -12    0.29    0.61
   8  -2  12   -0.69    0.76
  -8  -2  12    0.61    1.10
   8   2  12   -0.50    0.76
   8  -2 -12   -0.09    0.61
   0  -3  12   18.67    1.20
   0  -3 -12   17.33    1.06
   0   3  12   19.13    1.00
   0  -3  12   18.36    1.12
   0   3  12   18.73    1.15
  -1   3  12    1.45    0.35
   1   3 -12    1.62    0.18
   1  -3  12    1.57    0.30
   1  -3  12    1.50    0.39
  -1   3  12    1.93    0.19
   1  -3 -12    2.20    0.30
  -1  -3  12    1.71    0.43
   1   3  12    1.39    0.45
  -1  -3  12    1.78    0.40
   1   3  12    2.67    0.38
   2  -3  12   11.60    0.85
   2  -3  12   12.14    0.79
   2   3 -12   10.16    0.61
  -2   3  12   10.57    0.64
  -2   3  12   10.77    0.87
   2  -3 -12   10.07    0.72
  -2  -3  12   11.12    0.92
   2   3  12   10.50    0.78
   2   3  12   12.24    0.92
  -2  -3  12   12.41    0.87
  -3   3  12   36.56    2.08
   3  -3  12   35.44    2.03
   3  -3  12   34.40    1.96
   3  -3 -12   34.30    1.95
  -3  -3  12   33.67    2.05
   3   3  12   37.17    1.93
  -3  -3  12   34.12    2.10
   3   3  12   34.81    2.04
   4  -3  12    4.91    0.58
   4  -3  12    5.50    0.64
  -4   3  12    4.14    0.66
   4   3 -12    5.98    0.57
   4   3  12    6.00    0.70
   4  -3 -12    6.30    0.59
  -5   3  12    0.71    0.65
   5  -3  12    0.72    0.49
   5  -3  12    0.32    0.45
   5   3 -12    0.61    0.41
   5  -3 -12    0.58    0.42
   5   3  12    0.30    0.46
  -5  -3  12    1.37    0.68
   6  -3  12    1.77    0.64
  -6   3  12    0.89    0.76
   6   3 -12    2.11    0.50
   6  -3  12    2.01    0.59
   6  -3 -12    2.34    0.55
  -6  -3  12    3.28    0.88
   6   3  12    1.63    0.65
   7  -3  12    0.36    0.65
   7  -3  12    2.27    0.72
  -7   3  12    2.03    1.02
   7   3 -12    0.90    0.53
   7  -3 -12    0.84    0.58
  -7  -3  12    0.23    1.01
   7   3  12    0.12    0.62
  -8   3  12    9.46    1.60
   8  -3  12   11.45    1.16
   8   3 -12   10.70    1.02
  -8  -3  12    7.19    1.53
   8  -3 -12   10.39    1.11
   8   3  12    9.80    1.18
   0   4 -12   44.37    2.33
   0   4  12   45.28    2.46
   0  -4  12   45.51    2.49
   0  -4  12   45.87    2.41
   0   4  12   44.73    2.33
   0  -4 -12   44.02    2.37
   1  -4  12   70.23    3.50
  -1  -4 -12   68.47    3.48
  -1   4  12   67.39    3.45
  -1   4  12   68.39    3.57
   1   4 -12   66.31    3.44
   1  -4  12   64.46    3.60
   1   4  12   67.99    3.60
   1  -4 -12   68.48    3.51
  -1  -4  12   66.91    3.60
  -1   4 -12   64.32    3.50
   1   4  12   67.17    3.47
  -1  -4  12   66.01    3.57
   2  -4  12   16.78    0.94
  -2   4  12   13.49    1.02
   2  -4  12   14.34    1.09
   2   4 -12   15.91    0.85
  -2   4  12   15.33    0.86
   2  -4 -12   15.93    0.96
  -2  -4  12   14.45    1.13
   2   4  12   14.37    1.11
  -2  -4  12   12.81    1.08
   2   4  12   14.60    0.93
   3  -4  12   31.51    1.84
   3  -4  12   31.46    1.76
  -3   4  12   30.14    1.97
   3  -4 -12   32.43    1.78
  -3  -4  12   31.01    1.91
  -4   4  12   15.60    1.28
   4  -4  12   16.52    1.13
   4  -4  12   14.64    1.07
   4  -4 -12   16.10    1.08
   4   4  12   15.81    1.17
  -4  -4  12   15.77    1.19
   5   4 -12    9.99    0.81
   5  -4  12    8.49    0.86
  -5   4  12    8.84    1.02
   5  -4  12    8.10    0.77
   5  -4 -12    9.04    0.77
   5   4  12    7.30    0.87
  -5  -4  12    8.83    1.09
   6   4 -12    8.55    0.82
  -6   4  12    9.06    1.17
   6  -4  12    6.64    0.86
   6   4  12    7.61    0.90
   6  -4 -12    6.91    0.76
  -6  -4  12    8.92    1.18
  -7   4  12   10.85    1.34
   7   4 -12    9.57    0.92
   7  -4  12    9.55    1.04
  -7  -4  12    9.54    1.41
   7  -4 -12   10.17    1.01
   7   4  12    9.72    1.10
   8   4 -12    1.28    0.73
  -8   4  12    0.19    1.13
   8  -4  12    1.33    0.96
  -8  -4  12    2.05    1.29
   8  -4 -12    0.36    0.77
   8   4  12   -0.18    0.76
   0   5  12  162.40    8.14
   0   5  12  161.19    8.25
   0  -5 -12  161.62    8.16
   0  -5  12  162.25    8.20
   0  -5  12  151.55    8.26
   0   5 -12  160.29    8.13
  -1   5  12   66.88    3.40
  -1   5  12   66.91    3.51
   1  -5  12   62.57    3.42
   1   5 -12   66.94    3.41
   1  -5  12   63.84    3.55
  -1  -5  12   66.45    3.56
  -1   5 -12   62.86    3.41
   1   5  12   66.33    3.54
  -1  -5  12   66.76    3.52
   1   5  12   68.23    3.42
   1  -5 -12   66.23    3.44
   2   5 -12   24.58    1.33
   2  -5  12   24.77    1.33
   2  -5  12   23.64    1.52
  -2   5  12   23.62    1.30
  -2   5  12   21.72    1.44
   2  -5 -12   23.39    1.38
   2   5  12   22.51    1.51
  -2  -5  12   24.25    1.52
  -2  -5  12   24.67    1.54
   3  -5  12   49.14    2.74
  -3   5  12   48.85    2.58
   3  -5  12   48.08    2.59
  -3   5  12   52.59    2.75
   3  -5 -12   47.90    2.65
   3   5  12   47.37    2.74
  -3  -5  12   46.63    2.75
  -3  -5  12   51.30    2.81
   4  -5  12   10.98    0.99
  -4   5  12   13.48    1.12
   4  -5 -12   11.20    0.93
   4   5  12   12.28    1.04
  -4  -5  12   11.31    1.21
  -4  -5  12   13.96    1.12
   5  -5  12    4.21    0.71
  -5   5  12    3.16    0.81
   5   5 -12    3.31    0.53
   5  -5 -12    4.06    0.61
   5   5  12    2.78    0.67
  -5  -5  12    3.98    0.91
   6   5 -12    7.08    0.78
   6  -5  12    7.54    0.91
  -6   5  12    7.60    1.12
   6   5  12    7.61    0.89
   6  -5 -12    6.91    0.77
  -6  -5  12    5.41    1.12
   7   5 -12    1.69    0.64
  -7   5  12    2.66    1.13
   7  -5  12    1.07    0.70
  -7  -5  12    1.04    1.16
  -8   5  12   -0.10    1.17
   8  -5  12    1.15    0.85
   8   5 -12    1.39    0.75
  -8  -5  12    0.85    1.38
   8  -5 -12    0.74    0.84
   8   5  12    1.05    0.84
   0   6  12   -0.21    0.24
   0   6 -12    0.54    0.29
   0   6  12    0.09    0.36
   0  -6 -12    0.18    0.25
   0  -6  12    0.45    0.35
   1  -6  12    2.02    0.49
  -1   6  12    2.77    0.48
   1   6 -12    2.87    0.35
  -1   6  12    2.31    0.33
   1   6  12    3.10    0.36
   1  -6 -12    3.63    0.40
  -1   6 -12    2.34    0.37
  -1  -6  12    2.68    0.51
   1   6  12    2.73    0.56
   2   6 -12   16.87    1.03
  -2   6  12   16.48    1.02
   2  -6  12   17.46    1.22
   2   6  12   19.18    1.30
  -2   6 -12   17.08    1.09
   2  -6 -12   17.27    1.11
   2   6  12   19.37    1.06
  -2  -6  12   17.19    1.27
  -2  -6  12   16.54    1.26
  -3   6  12   10.76    0.76
  -3   6  12   10.33    0.91
   3  -6  12   10.24    0.92
   3   6 -12   11.95    0.97
  -3  -6  12   10.00    1.01
   3   6  12   11.12    0.96
  -3  -6  12   10.35    0.95
   3  -6 -12   12.34    0.94
  -4   6  12    7.23    0.65
   4  -6  12    7.75    0.85
  -4   6  12    9.64    0.96
   4  -6 -12    7.62    0.72
   4   6  12    7.26    0.84
  -4  -6  12    8.43    0.94
  -4  -6  12    8.15    0.99
   5   6 -12   12.96    1.01
   5  -6  12   13.47    1.15
  -5   6  12   12.67    1.26
  -5  -6  12   13.11    1.30
   5  -6 -12   14.48    1.08
   5   6  12   12.50    1.11
   6   6 -12    2.27    0.58
   6  -6  12    2.71    0.81
  -6   6  12    2.81    1.00
   6  -6 -12    3.26    0.71
  -6  -6  12    3.51    1.03
   6   6  12    2.81    0.76
   7   6 -12    2.99    0.72
  -7   6  12    2.98    1.08
   7   6  12    3.86    0.87
   7  -6 -12    3.85    0.81
  -7  -6  12    2.77    1.36
   0   7  12   19.32    1.14
   0  -7  12   19.41    1.33
   0  -7 -12   19.27    1.12
   0   7  12   16.74    1.28
   0   7 -12   19.08    1.12
  -1   7  12    1.00    0.31
   1  -7  12    0.49    0.45
   1   7 -12    0.29    0.32
  -1   7  12    0.29    0.36
  -1   7 -12    0.81    0.36
  -1  -7  12    1.02    0.51
   1  -7 -12    0.65    0.34
   1   7  12    0.38    0.43
   1   7  12    0.96    0.32
  -1  -7  12    0.95    0.51
  -2   7  12    1.32    0.34
   2  -7  12    0.01    0.52
  -2   7  12    1.12    0.46
   2   7 -12    0.33    0.31
   2   7  12    0.77    0.33
  -2   7 -12    1.42    0.40
   2  -7 -12    0.28    0.36
  -2  -7  12    1.42    0.54
   2   7  12    0.69    0.54
  -2  -7  12    1.64    0.57
  -3   7  12    9.86    0.74
  -3   7  12    8.93    0.87
   3  -7  12    9.22    0.89
  -3  -7  12    9.51    0.96
  -3   7 -12    9.76    0.79
   3   7  12    9.10    0.92
   3  -7 -12    9.51    0.79
  -3  -7  12    8.50    0.91
  -4   7  12    0.40    0.38
  -4   7  12    0.84    0.60
   4  -7  12    0.79    0.57
   4   7  12    0.31    0.57
  -4  -7  12    0.28    0.70
  -4  -7  12    0.53    0.58
   4  -7 -12    0.20    0.47
   5   7 -12    2.65    0.53
   5  -7  12    2.66    0.68
  -5   7  12    4.03    0.88
  -5  -7  12    1.74    0.93
   5  -7 -12    4.10    0.68
   5   7  12    2.64    0.69
   6  -7  12   11.61    1.20
   6   7 -12   11.78    1.01
  -6   7  12   11.73    1.37
   6  -7 -12   11.83    1.09
   6   7  12    9.17    1.13
  -6  -7  12   10.71    1.40
   7  -7  12    1.42    0.81
   7   7 -12    1.27    0.71
  -7  -7  12    2.89    1.43
   7  -7 -12    1.99    0.84
   7   7  12    1.32    0.82
   0   8 -12    7.73    0.65
   0   8  12    8.70    0.67
   0   8  12    7.67    0.72
   0  -8  12    9.10    0.87
   1  -8  12    7.71    0.79
   1   8 -12    7.37    0.62
  -1   8  12    7.92    0.62
  -1   8  12    7.34    0.74
   1  -8 -12    7.59    0.66
  -1   8 -12    6.89    0.64
  -1  -8  12    8.13    0.80
   1   8  12    8.68    0.66
   1   8  12    7.06    0.78
  -2   8  12    5.65    0.54
  -2   8  12    5.19    0.67
   2   8 -12    5.27    0.54
   2  -8  12    4.87    0.71
  -2  -8  12    6.31    0.78
   2  -8 -12    5.13    0.59
  -2   8 -12    4.41    0.56
   2   8  12    6.17    0.77
  -3   8  12    0.23    0.52
   3  -8  12    0.05    0.53
  -3   8  12    0.18    0.36
   3   8  12    0.66    0.39
  -3   8 -12    0.75    0.45
  -3  -8  12   -0.67    0.56
   3  -8 -12   -0.15    0.45
  -3  -8  12   -0.16    1.01
   3   8  12   -0.15    0.55
   4  -8  12    0.20    0.63
  -4   8  12    0.32    0.44
  -4   8  12    1.26    0.68
   4   8  12    0.61    0.60
  -4  -8  12   -0.05    0.80
   4  -8 -12    0.70    0.55
  -4  -8  12    0.74    0.67
  -5   8  12    1.93    0.86
   5  -8  12    3.29    0.80
   5  -8 -12    2.97    0.65
  -5  -8  12    3.86    1.02
   5   8  12    2.35    0.81
  -5  -8  12    2.33    0.80
  -6   8  12    2.63    1.10
   6   8 -12    2.96    0.68
   6  -8  12    1.70    0.85
   6   8  12    1.77    0.79
  -6  -8  12    2.09    1.16
  -7   8  12    2.70    1.33
   7   8 -12    2.43    0.80
   7  -8  12    5.13    1.07
   7   8  12    2.64    1.01
   7  -8 -12    1.66    0.90
   0   9  12    0.18    0.45
   0  -9  12    0.00    0.57
   0   9 -12    0.37    0.41
  -1   9  12    1.44    0.48
   1  -9  12    0.83    0.58
   1   9 -12    1.64    0.46
  -1  -9  12    0.94    0.59
   1   9  12    0.55    0.54
   1   9  12    1.26    0.42
  -1   9 -12    1.31    0.50
  -2   9  12   -0.21    0.39
  -2   9  12   -0.17    0.48
   2  -9  12   -0.12    0.55
   2   9 -12   -0.11    0.43
  -2  -9  12    0.42    0.56
  -2   9 -12   -0.12    0.42
   2  -9 -12    0.26    0.48
   2   9  12    0.17    0.56
   2   9  12    0.15    0.41
  -3   9  12    6.24    0.79
  -3   9  12    6.17    0.61
   3  -9  12    5.55    0.85
  -3  -9  12    4.26    0.78
   3   9  12    4.55    0.84
  -3   9 -12    4.95    0.69
   3   9  12    6.06    0.64
   3  -9 -12    4.51    0.70
  -4   9  12    2.00    0.52
  -4   9  12    1.38    0.73
   4  -9  12    1.08    0.67
  -4  -9  12    0.95    0.70
   4  -9 -12    1.94    0.64
   4   9  12    1.50    0.71
  -4   9 -12    0.94    0.59
  -5   9  12    0.39    0.85
   5  -9 -12    0.41    0.70
  -5  -9  12    0.72    0.82
   5   9  12    0.16    0.82
  -6   9  12    0.03    1.09
   6  -9  12    0.90    0.90
   6   9 -12    0.22    0.65
   6   9  12    0.67    0.82
   6  -9 -12    0.59    0.83
   0  10  12    1.18    0.50
   0 -10  12    1.12    0.58
   0  10 -12    0.62    0.48
   0  10  12    0.21    0.43
  -1  10  12    2.25    0.55
   1 -10  12    1.16    0.65
  -1  10  12    0.88    0.46
   1  10 -12    0.82    0.49
  -1  10 -12    1.30    0.50
  -1 -10  12    2.63    0.70
   1  10  12    2.20    0.57
   1  10  12    1.09    0.48
   2 -10  12    0.53    0.67
  -2  10  12    0.77    0.55
   2  10 -12   -0.38    0.50
  -2  10  12   -0.97    0.43
   2  10  12    0.27    0.46
  -2 -10  12   -0.06    0.63
  -2  10 -12    0.29    0.48
   2  10  12   -0.23    0.59
  -3  10  12    0.45    0.46
  -3  10  12    0.38    0.60
   3 -10  12    0.71    0.72
  -3 -10  12   -0.32    0.67
  -3  10 -12    0.09    0.57
   3 -10 -12   -0.05    0.63
   3  10  12   -0.13    0.66
   3  10  12   -0.04    0.48
  -4  10  12    0.74    0.54
   4 -10  12    0.04    0.80
  -4  10  12    0.75    0.78
  -4 -10  12   -0.12    0.78
   4 -10 -12    0.66    0.74
   4  10  12    0.71    0.80
  -4  10 -12    1.26    0.67
   4  10  12    0.77    0.55
   5 -10  12    1.71    0.91
  -5 -10  12    2.75    0.94
   5  10  12    1.51    0.92
   5 -10 -12    1.11    0.84
   0  11  12    6.76    0.72
   0  11  12    5.01    0.72
   0 -11  12    5.22    0.87
   0  11 -12    4.80    0.68
  -1  11  12    2.78    0.57
  -1  11  12    3.33    0.63
   1  11 -12    2.78    0.62
   1 -11  12    3.49    0.72
   1  11  12    3.08    0.64
  -1  11 -12    2.88    0.63
   1  11  12    3.06    0.60
  -1 -11  12    3.81    0.75
  -2  11  12    0.37    0.52
  -2  11  12    0.96    0.61
   2 -11  12    0.75    0.74
   2  11  12    0.35    0.54
  -2  11 -12    0.84    0.59
   2  11  12    0.43    0.62
  -2 -11  12    0.49    0.68
  -3  11  12    1.98    0.56
   3  11  12    0.94    0.59
  -3 -11  12    0.95    0.76
  -3  11 -12    1.54    0.64
   3  11  12    0.91    0.80
   4 -11  12    0.88    0.87
   4  11  12    1.01    0.73
  -4  11 -12    1.53    0.75
   4 -11 -12    0.62    0.81
  -4 -11  12    1.12    0.87
   5 -11  12    0.89    0.96
   5  11  12   -0.87    0.94
   5  11  12    0.08    0.67
   5 -11 -12    0.03    0.92
   0  12  12    0.12    0.57
   0  12 -12   -0.19    0.58
   0 -12  12    0.20    0.69
   0  12  12   -0.41    0.55
  -1  12  12   -0.83    0.50
   1 -12  12    0.80    0.76
   1  12 -12   -0.60    0.59
   1  12  12    0.02    0.57
  -1 -12  12    0.98    0.80
   1  12  12    0.05    0.61
  -1  12 -12   -0.51    0.63
  -2  12  12    1.48    0.58
   2 -12  12    1.71    0.77
  -2  12 -12    1.32    0.68
  -2 -12  12    1.29    0.82
   2  12  12    2.09    0.75
   2  12  12    3.33    0.70
  -3  12  12   -0.31    0.57
   3 -12  12   -0.36    0.86
  -3 -12  12    1.16    0.88
  -3  12 -12   -0.21    0.71
   3  12  12    0.19    0.81
   4 -12  12    1.02    0.96
   4  12  12   -0.45    0.66
   4  12  12   -0.09    0.88
  -4  12 -12    0.61    0.75
   0 -13  12    0.77    0.87
   0  13  12    0.70    0.69
   0  13 -12   -0.20    0.69
   1 -13  12    1.32    0.87
  -1  13  12    0.65    0.66
   1  13  12    0.67    1.08
  -1 -13  12    0.88    0.88
  -1  13 -12    0.64    0.73
   2 -13  12    2.67    0.92
  -2  13 -12    2.79    0.93
  -2 -13  12    3.56    0.98
   2  13  12    1.91    0.75
   0   0  13    0.30    0.28
   0   0  13   -0.29    0.31
  -1   0  13   -0.41    0.37
   1   0  13   -0.35    0.31
  -1   0  13    0.00    0.33
   1   0  13   -0.41    0.29
   2   0  13    3.66    0.52
  -2   0  13    3.78    0.57
  -2   0  13    2.81    0.48
   2   0  13    3.29    0.46
   3   0  13    0.16    0.41
   3   0 -13    1.08    0.33
   3   0  13    0.71    0.36
  -3   0  13    0.58    0.44
   4   0  13    6.35    0.60
   4   0 -13    5.13    0.55
  -4   0  13    6.41    0.78
   4   0  13    4.58    0.61
   5   0  13   -0.37    0.50
   5   0  13    0.50    0.45
   5   0 -13    0.15    0.35
  -5   0  13   -0.05    0.62
   6   0 -13    8.91    0.85
   6   0  13    8.68    0.93
  -6   0  13    9.91    1.22
  -7   0  13    0.94    1.01
   7   0  13   -0.35    0.70
   7   0 -13    0.08    0.53
  -8   0  13    1.70    1.14
   8   0 -13    2.24    0.69
   0   1  13   17.31    1.11
   0  -1  13   17.07    1.05
   0  -1  13   16.76    1.12
   0   1  13   15.97    1.05
   1  -1  13    2.77    0.44
   1  -1  13    2.68    0.41
  -1   1  13    2.51    0.50
  -1   1  13    2.18    0.39
  -1  -1  13    2.86    0.44
   1   1  13    2.41    0.42
  -1  -1  13    2.96    0.51
   1   1  13    3.46    0.49
   2  -1  13    6.90    0.65
   2  -1  13    8.36    0.69
  -2   1  13    7.83    0.73
  -2  -1  13    8.61    0.75
  -2  -1  13    6.27    0.71
   2  -1 -13    7.34    0.62
   2   1  13    8.44    0.65
   2   1  13    8.23    0.70
   3   1 -13   12.79    0.88
   3  -1  13   13.53    1.01
   3  -1  13   13.52    0.95
  -3   1  13   12.76    1.06
   3   1  13   14.10    0.92
  -3  -1  13   11.00    0.99
   3   1  13   14.61    1.07
  -3  -1  13   12.75    1.04
   3  -1 -13   12.80    0.90
   4  -1  13    6.28    0.62
   4   1 -13    5.07    0.58
   4  -1  13    4.87    0.64
  -4   1  13    4.74    0.70
   4  -1 -13    5.60    0.58
   4   1  13    5.12    0.73
  -4  -1  13    6.13    0.81
   4   1  13    5.15    0.55
  -5   1  13    3.70    0.79
   5  -1  13    2.68    0.59
   5   1 -13    2.57    0.51
   5  -1  13    2.86    0.54
   5  -1 -13    4.21    0.55
  -5  -1  13    3.07    0.77
   5   1  13    2.66    0.62
  -6   1  13    5.99    1.02
   6  -1  13    5.63    0.71
   6  -1  13    3.88    0.72
   6   1 -13    6.06    0.69
  -6  -1  13    8.12    1.10
   6  -1 -13    5.11    0.68
   6   1  13    5.71    0.75
   7   1 -13   -0.04    0.57
   7  -1  13   -0.01    0.68
  -7   1  13    0.72    0.90
   7  -1 -13    0.33    0.57
   7   1  13   -0.63    0.62
  -7  -1  13    0.67    1.04
   8   1 -13    4.50    0.81
  -8   1  13    6.26    1.32
   8  -1  13    3.55    0.94
   8   1  13    3.52    0.92
   8  -1 -13    4.30    0.83
  -8  -1  13    4.73    1.38
   0  -2  13   10.27    0.80
   0   2  13   10.04    0.77
   0   2  13    9.49    0.77
   0  -2  13    9.09    0.71
   0   2  13    8.99    0.52
   1  -2  13    6.57    0.67
   1  -2  13    6.74    0.56
  -1   2  13    6.31    0.60
   1  -2 -13    7.38    0.57
  -1  -2  13    6.94    0.67
   1   2  13    7.49    0.63
  -1  -2  13    7.26    0.65
   1   2  13    7.81    0.68
   2  -2  13    8.28    0.69
  -2   2  13    5.76    0.63
   2  -2  13    6.95    0.60
  -2  -2  13    7.20    0.72
   2  -2 -13    6.82    0.56
   2   2  13    6.71    0.58
  -2  -2  13    5.27    0.67
   2   2  13    7.64    0.71
   3  -2  13    9.47    0.79
   3  -2  13    9.87    0.80
  -3  -2  13   10.06    0.92
   3  -2 -13    9.43    0.76
   3   2  13    9.70    0.74
   3   2  13   10.66    0.89
  -4   2  13    8.69    0.88
   4   2 -13    7.98    0.71
   4  -2  13    7.68    0.75
   4  -2  13    9.75    0.80
  -4  -2  13    7.32    0.88
   4   2  13    7.75    0.79
   4  -2 -13    8.55    0.70
   5   2 -13    8.80    0.76
  -5   2  13    9.35    1.02
   5  -2  13    8.30    0.80
  -5  -2  13    8.86    1.04
   5   2  13    8.20    0.84
   5  -2 -13    9.05    0.77
  -6   2  13    0.08    0.82
   6   2 -13    1.47    0.51
   6  -2  13    0.66    0.59
   6  -2  13    0.69    0.57
  -6  -2  13    0.45    0.86
   6   2  13    0.59    0.57
   6  -2 -13    1.52    0.53
   7  -2  13    4.09    0.77
   7   2 -13    2.61    0.66
   7  -2  13    3.82    0.80
  -7   2  13    4.85    1.09
   7   2  13    3.28    0.77
  -7  -2  13    4.15    1.10
   7  -2 -13    4.24    0.72
   8  -2  13    3.08    0.93
  -8   2  13    4.93    1.41
   8   2 -13    4.57    0.78
  -8  -2  13    4.53    1.38
   8  -2 -13    3.53    0.77
   8   2  13    4.32    0.91
   0   3  13    2.75    0.45
   0  -3 -13    4.76    0.41
   0  -3  13    4.19    0.45
   0   3  13    3.44    0.28
   0  -3  13    3.18    0.53
   1  -3  13    1.08    0.45
  -1   3  13    1.67    0.38
  -1   3  13    1.61    0.19
   1  -3  13    1.74    0.31
  -1  -3  13    1.43    0.44
   1   3  13    1.51    0.22
   1   3  13    0.76    0.41
   1   3  13    1.72    0.38
  -1  -3  13    1.97    0.42
   1  -3 -13    2.08    0.33
  -2   3  13    1.55    0.41
   2  -3  13    1.45    0.47
   2  -3  13    1.97    0.37
   2   3  13    1.20    0.46
   2   3  13    1.33    0.35
  -2  -3  13    1.55    0.46
  -2  -3  13    0.99    0.45
   2  -3 -13    1.09    0.32
  -3   3  13   22.53    1.53
   3  -3  13   25.66    1.46
   3  -3  13   25.19    1.53
   3   3  13   24.35    1.54
   3  -3 -13   24.60    1.44
  -3  -3  13   25.08    1.61
  -3  -3  13   22.34    1.59
   3   3  13   23.80    1.41
   4  -3  13    6.22    0.68
  -4   3  13    7.48    0.87
   4   3 -13    7.70    0.70
   4  -3  13    8.14    1.08
   4   3  13    7.12    0.77
  -4  -3  13    7.50    0.93
   4  -3 -13    7.35    0.68
   5   3 -13    8.75    0.82
  -5   3  13    6.54    0.96
   5  -3  13    8.90    0.83
   5  -3  13    9.99    0.90
   5   3  13   12.72    1.00
  -5  -3  13   10.14    1.15
   5  -3 -13    8.97    0.80
   6  -3  13    1.45    0.59
   6   3 -13    2.34    0.55
  -6   3  13    2.52    0.94
   6  -3  13    1.64    0.63
  -6  -3  13    1.98    0.88
   6  -3 -13    1.50    0.55
   6   3  13    1.04    0.66
  -7   3  13   11.52    1.50
   7  -3  13   10.95    1.12
   7   3 -13   11.35    1.01
   7   3  13   10.12    1.10
  -7  -3  13   11.00    1.41
   7  -3 -13   11.16    1.06
   8   3 -13    0.55    0.70
  -8   3  13    0.10    1.27
   8  -3 -13    0.58    0.76
  -8  -3  13    1.04    1.34
   8   3  13   -0.07    0.79
   0   4 -13    1.14    0.25
   0  -4 -13    1.30    0.28
   0   4  13    1.79    0.42
   0  -4  13    0.88    0.46
   0   4  13    1.47    0.23
   0  -4  13    0.77    0.34
  -1  -4 -13   93.34    4.87
   1  -4  13   96.14    4.89
   1  -4  13   92.88    4.98
  -1   4  13   95.68    4.83
  -1   4  13   97.25    4.96
   1   4  13   98.42    4.85
   1   4  13   94.44    4.98
  -1  -4  13   95.66    4.97
  -1  -4  13   90.24    4.99
   1  -4 -13   91.97    4.90
   2  -4  13   18.88    1.25
  -2   4  13   18.27    1.27
   2  -4  13   18.48    1.08
  -2  -4  13   17.47    1.26
   2  -4 -13   17.16    1.11
   3  -4  13    7.30    0.61
   3  -4  13    5.65    0.75
  -3   4  13    6.73    0.73
   3   4  13    7.72    0.80
  -3  -4  13    6.81    0.77
  -3  -4  13    5.93    0.72
   3  -4 -13    6.77    0.62
   4  -4  13   38.04    2.07
   4  -4  13   35.60    2.12
  -4   4  13   34.34    2.20
   4  -4 -13   36.81    2.06
  -4  -4  13   37.26    2.19
   4   4  13   35.80    2.16
  -4  -4  13   36.36    2.30
  -5   4  13   11.64    1.21
   5  -4  13   12.35    0.98
   5   4 -13   13.76    1.01
   5  -4  13   12.09    1.05
   5  -4 -13   13.01    0.99
  -5  -4  13   12.13    1.28
   5   4  13   10.83    1.07
   6  -4  13    5.37    0.80
  -6   4  13    4.69    1.04
   6   4 -13    5.23    0.71
  -6  -4  13    5.50    1.11
   6   4  13    4.63    0.78
   6  -4 -13    3.70    0.64
  -7   4  13    0.14    1.15
   7  -4  13    1.42    0.80
   7   4 -13    1.04    0.64
  -7  -4  13    0.57    1.12
   7  -4 -13    0.16    0.70
   8  -4  13    0.14    0.89
  -8   4  13    0.06    1.29
   8   4 -13    0.18    0.71
   8   4  13   -1.17    0.89
  -8  -4  13    0.49    1.37
   8  -4 -13    0.36    0.82
   0   5 -13    1.20    0.31
   0  -5 -13    1.20    0.30
   0   5  13    1.35    0.26
   0  -5  13    1.37    0.38
   0   5  13    0.84    0.38
  -1   5  13   39.67    2.35
  -1   5  13   41.41    2.13
  -1  -5 -13   39.15    2.14
   1  -5  13   41.66    2.18
  -1   5 -13   40.79    2.15
  -1  -5  13   39.59    2.39
   1   5  13   40.74    2.15
   1  -5 -13   40.05    2.18
  -1  -5  13   39.76    2.27
  -2   5  13   30.58    1.66
   2  -5  13   28.10    1.83
  -2   5  13   28.15    1.81
   2  -5  13   31.11    1.69
  -2  -5  13   34.63    1.92
   2  -5 -13   31.26    1.75
  -2  -5  13   32.87    1.88
   2   5  13   33.10    1.88
   3  -5  13   10.85    0.96
   3  -5  13   11.77    1.06
  -3   5  13   11.09    1.01
   3   5  13   15.43    1.15
  -3  -5  13   11.93    1.02
  -3  -5  13   14.16    1.14
  -4   5  13    5.32    0.82
   4  -5  13    5.88    0.74
  -4  -5  13    6.44    0.86
  -4  -5  13    7.18    0.98
   4  -5 -13    7.28    0.66
   4   5  13    7.52    0.86
   5   5 -13   10.23    0.87
   5  -5  13    8.30    0.88
  -5   5  13    8.98    1.04
   5  -5 -13   10.35    0.88
  -5  -5  13    8.39    1.15
   5   5  13    7.83    0.95
  -6   5  13    4.50    1.01
   6   5 -13    5.31    0.72
   6  -5  13    4.26    0.80
   6  -5 -13    5.06    0.75
   6   5  13    4.14    0.81
  -6  -5  13    5.26    1.13
   7  -5  13    0.52    0.82
   7   5 -13    1.83    0.64
   7  -5 -13    1.30    0.66
   7   5  13    2.49    0.79
   0  -6  13    0.27    0.37
   0  -6  13    0.66    0.49
   0  -6 -13    0.20    0.28
   0   6 -13    0.13    0.29
   0   6  13   -0.23    0.26
   0   6  13    0.06    0.37
  -1   6  13    3.57    0.38
  -1   6  13    3.84    0.53
   1  -6  13    3.30    0.59
  -1  -6  13    3.65    0.58
  -1   6 -13    3.76    0.42
   1   6  13    3.66    0.57
   1   6  13    4.24    0.41
  -1  -6  13    4.04    0.57
   1  -6 -13    3.46    0.42
  -2   6  13   18.30    1.09
   2  -6  13   18.68    1.34
  -2   6  13   20.77    1.27
   2  -6 -13   17.42    1.16
  -2   6 -13   18.80    1.15
   2   6  13   17.78    1.32
   2   6  13   21.45    1.14
  -2  -6  13   18.49    1.37
  -2  -6  13   16.27    1.34
   3  -6  13    6.63    0.75
  -3   6  13    5.61    0.75
   3  -6 -13    6.66    0.65
   3   6  13    5.51    0.80
  -3  -6  13    7.25    0.84
  -3  -6  13    6.96    0.88
   4  -6  13    8.97    0.93
  -4   6  13    7.99    0.93
  -4  -6  13    8.62    0.95
  -4  -6  13    8.41    1.03
   4   6  13    7.30    0.92
   4  -6 -13    6.88    0.73
   5   6 -13   -0.33    0.46
   5  -6  13    0.48    0.58
  -5   6  13   -0.53    0.67
   5   6  13   -0.59    0.63
  -5  -6  13   -0.09    0.73
   5  -6 -13   -0.33    0.49
   6  -6  13    2.18    0.78
   6   6 -13    2.02    0.58
  -6   6  13    1.55    0.99
   6  -6 -13    1.72    0.69
   6   6  13    0.71    0.69
  -6  -6  13    1.01    0.95
  -7   6  13    9.93    1.49
   7  -6  13    7.82    1.09
   7  -6 -13    6.42    0.92
   7   6  13    6.55    1.10
  -7  -6  13    8.26    1.53
   0   7  13    4.72    0.57
   0   7 -13    3.76    0.46
   0   7  13    5.00    0.48
   0  -7  13    3.91    0.66
  -1   7  13    2.88    0.49
   1  -7  13    1.46    0.52
  -1   7  13    2.16    0.36
   1  -7 -13    3.30    0.43
  -1   7 -13    2.53    0.41
  -1  -7  13    2.54    0.57
   1   7  13    1.85    0.38
   1   7  13    1.99    0.56
   2  -7  13    2.08    0.56
  -2   7  13    2.03    0.48
  -2   7  13    2.00    0.36
  -2  -7  13    2.18    0.64
   2   7  13    1.78    0.55
  -2  -7  13    1.29    0.57
   2   7  13    1.66    0.38
  -2   7 -13    2.10    0.46
   2  -7 -13    2.14    0.45
   3  -7  13   10.89    1.01
  -3   7  13   12.84    1.06
   3   7  13   10.49    1.03
  -3  -7  13   12.11    1.05
   3  -7 -13   12.46    0.94
  -3  -7  13   11.14    1.09
   4  -7  13    3.16    0.68
  -4   7  13    2.25    0.67
   4  -7 -13    4.00    0.65
  -4  -7  13    3.39    0.86
   4   7  13    2.15    0.70
  -4  -7  13    4.55    0.83
   5  -7  13    3.48    0.81
   5   7 -13    2.99    0.61
  -5   7  13    5.92    0.99
  -5  -7  13    4.16    1.05
   5   7  13    2.72    0.82
   5  -7 -13    2.90    0.68
  -6   7  13    0.00    0.88
   6  -7  13   -0.20    0.86
   6   7 -13    0.16    0.58
  -6  -7  13   -0.60    1.05
   6   7  13   -0.99    0.68
   6  -7 -13    0.47    0.71
   7   7 -13    0.71    0.69
  -7   7  13    0.37    1.22
   7  -7  13    1.01    0.91
   7   7  13    0.14    0.81
   7  -7 -13    0.01    0.80
  -7  -7  13    0.18    1.28
   0   8  13    0.40    0.45
   0   8  13    0.28    0.34
   0  -8  13    0.22    0.55
   0   8 -13    0.27    0.36
  -1   8  13    6.34    0.67
   1  -8  13    6.43    0.81
  -1   8  13    7.14    0.59
   1   8  13    6.96    0.61
   1   8  13    6.77    0.78
  -1   8 -13    6.70    0.61
  -1  -8  13    7.42    0.82
  -2   8  13    2.91    0.45
   2  -8  13    2.94    0.62
  -2   8  13    3.38    0.57
   2  -8 -13    3.09    0.55
   2   8  13    3.20    0.69
   2   8  13    3.57    0.49
  -2  -8  13    2.93    0.67
  -2   8 -13    3.44    0.53
  -3   8  13    0.14    0.49
   3  -8  13    0.13    0.63
   3   8  13   -0.59    0.63
   3   8  13    0.68    0.38
  -3   8 -13    0.15    0.49
  -3  -8  13    0.21    0.56
   3  -8 -13    0.01    0.49
  -4   8  13    3.05    0.77
   4  -8  13    2.17    0.72
   4  -8 -13    2.39    0.59
  -4  -8  13    3.12    0.80
  -4  -8  13    2.38    0.92
   4   8  13    2.77    0.74
   5  -8  13    4.44    0.85
  -5   8  13    6.21    1.01
  -5  -8  13    4.82    0.96
  -5  -8  13    3.86    1.13
   5  -8 -13    4.91    0.81
   5   8  13    4.45    0.95
   6  -8  13    0.38    0.85
  -6   8  13    0.15    1.07
   6   8 -13    0.11    0.64
   6   8  13   -0.88    0.74
  -6  -8  13   -0.35    1.12
   6  -8 -13   -0.74    0.72
   0   9 -13    7.07    0.68
   0   9  13    8.03    0.68
   0   9  13    7.12    0.73
   0  -9  13    7.12    0.87
  -1   9  13    0.08    0.41
   1  -9  13    0.58    0.55
  -1  -9  13    1.52    0.65
   1   9  13    0.71    0.43
   1   9  13    1.16    0.56
  -2   9  13    5.52    0.76
  -2   9  13    7.25    0.64
   2  -9  13    5.88    0.80
  -2   9 -13    6.72    0.69
   2   9  13    7.01    0.87
  -2  -9  13    5.85    0.86
   2   9  13    6.07    0.66
  -3   9  13    1.18    0.64
   3  -9  13    0.86    0.69
   3  -9 -13    1.22    0.60
   3   9  13    1.00    0.65
  -3  -9  13    1.43    0.71
  -3   9 -13    1.78    0.57
   3   9  13    1.72    0.47
  -4   9  13    1.15    0.78
   4  -9  13    0.89    0.75
  -4  -9  13    0.84    0.79
   4   9  13    1.45    0.51
   4   9  13    1.17    0.82
   4  -9 -13    1.68    0.67
  -5   9  13    1.51    0.94
   5  -9  13    0.60    0.84
   5   9  13   -0.19    0.82
   5  -9 -13    0.27    0.71
  -5  -9  13    0.62    0.82
   6  -9  13    9.81    1.28
   6   9  13   12.30    1.36
   6  -9 -13    8.05    1.12
   0 -10  13    1.34    0.68
   0  10  13    0.93    0.49
   0  10  13    1.68    0.51
   0  10 -13    1.23    0.57
  -1  10  13    2.00    0.59
   1 -10  13    2.62    0.73
  -1  10  13    1.21    0.47
  -1  10 -13    2.28    0.57
  -1 -10  13    2.96    0.75
   1  10  13    1.97    0.61
   1  10  13    2.01    0.52
  -2  10  13    5.75    0.65
   2 -10  13    4.25    0.79
  -2  10  13    5.09    0.76
   2  10  13    6.21    0.69
  -2  10 -13    5.01    0.68
  -2 -10  13    5.03    0.84
   2  10  13    6.42    0.85
   3 -10  13    0.45    0.76
  -3  10  13    1.26    0.70
  -3 -10  13    0.91    0.77
   3  10  13    0.04    0.66
   3  10  13    1.27    0.56
  -3  10 -13    0.81    0.62
   4 -10  13    6.48    0.98
  -4  10  13    8.06    1.11
   4  10  13    7.84    1.15
   4  10  13    9.30    0.87
  -4 -10  13    8.44    1.12
   4 -10 -13    6.71    0.98
   5 -10  13    4.07    1.02
   5  10  13    4.53    0.74
   5  10  13    2.01    0.91
  -5 -10  13    1.72    1.02
   0  11  13    1.03    0.58
   0 -11  13    1.48    0.76
   0  11  13    0.73    0.50
  -1  11  13    0.78    0.53
   1 -11  13    0.78    0.67
  -1  11  13    0.57    0.58
   1  11  13    0.75    0.61
  -1 -11  13    1.41    0.70
   1  11  13    1.05    0.53
  -1  11 -13    2.11    0.62
   2 -11  13    1.74    0.73
  -2  11  13    1.58    0.66
  -2  11  13    0.93    0.55
   2  11  13    0.89    0.57
   2  11  13    0.42    0.69
  -2  11 -13    1.30    0.62
  -2 -11  13    0.99    0.77
  -3  11  13   10.64    1.18
   3 -11  13    9.76    1.23
  -3  11 -13   13.14    1.11
   3  11  13   11.95    1.22
  -3 -11  13   12.98    1.30
   3  11  13   12.20    1.05
   4 -11  13    0.68    0.91
   4  11  13   -1.01    0.81
   4  11  13    0.83    0.74
  -4 -11  13    0.55    1.03
  -4  11 -13   -0.27    0.75
   0  12  13    1.48    0.63
   0  12  13    1.05    0.63
   1 -12  13    7.90    1.05
  -1  12  13    9.84    0.92
   1  12  13    9.66    0.99
  -1 -12  13   10.74    1.30
   1  12  13   10.86    0.97
   2 -12  13    2.07    0.85
   2  12  13    1.37    0.67
  -2  12 -13    1.37    0.71
   2  12  13    2.89    0.77
   3 -12  13    0.11    0.80
  -3 -12  13    0.92    0.98
   3  12  13    0.24    0.67
  -3  12 -13    1.05    0.90
   3  12  13   -0.16    0.77
   0 -13  13    9.19    1.23
   1 -13  13   11.11    1.32
  -1 -13  13   11.93    1.32
   1  13  13   11.37    1.10
   0   0  14    0.65    0.39
   0   0  14    0.13    0.33
   1   0  14   24.62    1.49
  -1   0  14   25.28    1.49
   1   0  14   23.38    1.45
  -1   0  14   26.01    1.56
  -2   0  14    0.67    0.40
  -2   0  14   -0.27    0.40
   2   0  14    0.37    0.37
   2   0  14    0.39    0.38
  -3   0  14    1.53    0.50
   3   0  14    1.22    0.41
   3   0  14    0.34    0.46
   3   0 -14    0.91    0.33
  -4   0  14    1.59    0.60
   4   0  14    1.55    0.57
   4   0  14    2.35    0.47
   4   0 -14    2.53    0.45
   5   0  14   10.90    0.97
   5   0 -14    9.75    0.84
  -5   0  14    8.83    1.06
   5   0  14   11.46    0.89
   6   0 -14   -0.22    0.43
   6   0  14   -0.99    0.60
  -6   0  14    0.48    0.87
   7   0 -14    0.10    0.63
   7   0  14   -0.26    0.69
  -8   0  14    1.07    1.15
   8   0 -14    0.08    0.69
   8   0  14   -1.07    0.86
   0  -1  14    4.14    0.47
   0  -1  14    4.37    0.54
   0   1  14    4.59    0.56
   0   1  14    4.41    0.50
  -1   1  14    2.18    0.44
   1  -1  14    1.86    0.41
   1  -1  14    1.65    0.39
  -1   1  14    2.65    0.53
  -1  -1  14    2.32    0.52
   1   1  14    1.36    0.41
   1   1  14    2.22    0.43
  -1  -1  14    2.48    0.42
   2  -1  14    3.01    0.48
  -2   1  14    3.32    0.52
   2  -1  14    3.43    0.52
   2  -1 -14    2.99    0.43
  -2  -1  14    2.67    0.54
   2   1  14    2.45    0.43
  -2  -1  14    3.02    0.53
   2   1  14    1.69    0.51
   3  -1  14   17.28    1.13
  -3   1  14   15.18    1.18
   3   1 -14   15.94    1.05
   3  -1  14   15.42    1.10
  -3  -1  14   17.07    1.21
   3   1  14   15.21    1.14
   3   1  14   16.05    1.08
   3  -1 -14   17.12    1.05
   4  -1  14    1.63    0.48
  -4   1  14    3.03    0.68
   4   1 -14    1.62    0.41
   4  -1  14    1.96    0.55
   4  -1 -14    1.95    0.44
   4   1  14    1.65    0.52
   4   1  14    1.85    0.45
  -4  -1  14    1.21    0.65
  -5   1  14    2.16    0.73
   5   1 -14    2.70    0.52
   5  -1  14    2.54    0.55
   5  -1  14    2.58    0.63
   5  -1 -14    1.79    0.47
   5   1  14    3.21    0.62
  -5  -1  14    2.31    0.77
  -6   1  14    0.62    0.78
   6  -1  14    0.67    0.63
   6   1 -14    2.51    0.54
   6  -1  14    1.76    0.60
  -6  -1  14    2.03    0.86
   6   1  14    2.22    0.71
   6  -1 -14    1.30    0.50
   7  -1  14    1.41    0.79
   7   1 -14    3.30    0.65
   7   1  14    1.86    0.80
   7  -1 -14    2.84    1.09
  -8   1  14    3.15    1.26
   8   1 -14    1.79    0.77
   8  -1  14   -0.06    1.24
   8  -1 -14    0.93    0.73
   8   1  14    0.45    0.87
  -8  -1  14    0.45    1.29
   0   2  14    0.21    0.37
   0   2  14    0.18    0.41
   0  -2  14   -0.58    0.29
   0  -2  14   -0.42    0.36
   1  -2  14    8.10    0.65
   1  -2  14    6.75    0.71
  -1   2  14    8.82    0.74
   1   2  14    8.68    0.70
  -1  -2  14    8.24    0.71
  -1  -2  14    7.11    0.75
   1  -2 -14    8.00    0.64
   1   2  14    8.00    0.72
   2  -2  14   28.54    1.77
  -2   2  14   28.02    1.87
   2  -2  14   30.34    1.72
  -2  -2  14   34.21    1.94
   2  -2 -14   30.65    1.71
  -2  -2  14   28.37    1.81
   2   2  14   31.19    1.72
   2   2  14   29.45    1.82
   3  -2  14    2.39    0.49
  -3   2  14    0.88    0.50
   3  -2  14    2.75    0.48
  -3  -2  14    2.14    0.55
   3   2  14    2.28    0.57
   3  -2 -14    2.32    0.43
   3   2  14    1.83    0.40
   4  -2  14    4.02    0.62
  -4   2  14    5.66    0.79
   4   2 -14    3.49    0.53
   4  -2  14    4.46    0.59
   4   2  14    3.76    0.63
  -4  -2  14    3.81    0.73
   4  -2 -14    4.30    0.52
  -5   2  14    0.30    0.63
   5   2 -14    0.10    0.43
   5  -2  14    0.67    0.53
   5  -2  14   -0.38    0.52
   5  -2 -14   -0.08    0.43
  -5  -2  14   -0.14    0.74
   5   2  14    0.59    0.60
   6   2 -14   14.87    1.20
  -6   2  14   17.63    1.58
   6  -2  14   13.60    1.19
   6  -2  14   16.73    1.23
   6   2  14   14.82    1.27
   6  -2 -14   15.34    1.21
  -6  -2  14   14.79    1.52
   7  -2  14    1.16    0.76
   7   2 -14    1.21    0.70
   7   2  14    0.28    0.77
   7  -2 -14    1.38    0.98
  -8   2  14    2.43    1.38
   8   2 -14    3.29    0.84
   8  -2 -14    3.07    0.83
   8   2  14    2.17    0.89
  -8  -2  14    4.90    1.47
   0  -3  14   25.26    1.52
   0  -3  14   26.08    1.63
   0   3  14   26.93    1.57
   0  -3 -14   27.08    1.49
  -1   3  14   19.72    1.26
   1  -3  14   19.27    1.16
   1  -3  14   21.14    1.32
   1   3  14   19.21    1.27
  -1  -3  14   17.53    1.24
   1  -3 -14   20.15    1.17
  -1  -3  14   20.67    1.34
   1   3  14   19.01    1.06
   1   3  14   18.75    1.23
   2  -3  14    3.49    0.58
  -2   3  14    3.79    0.54
   2  -3  14    5.55    0.51
   2   3  14    4.46    0.50
   2   3  14    3.90    0.63
  -2  -3  14    3.87    0.63
   2  -3 -14    3.53    0.45
  -2  -3  14    4.52    0.64
   3  -3  14   -0.29    0.37
  -3   3  14    0.40    0.49
   3  -3 -14   -0.42    0.32
   3   3  14   -0.40    0.46
  -3  -3  14   -0.08    0.57
  -3  -3  14    0.38    0.53
  -4   3  14   10.92    1.02
   4   3 -14    9.94    0.82
   4  -3  14    9.51    0.87
   4  -3  14    9.50    0.82
   4  -3 -14    9.20    0.78
   4   3  14    7.83    0.87
  -4  -3  14    8.50    0.97
  -5   3  14    3.84    0.83
   5  -3  14    4.82    0.74
   5   3 -14    5.73    0.65
  -5  -3  14    4.39    0.92
   5   3  14    4.62    0.79
   5  -3 -14    5.85    0.68
   6   3 -14   24.16    1.56
   6  -3  14   23.67    1.67
  -6   3  14   23.10    1.87
   6  -3  14   22.38    1.62
   6  -3 -14   23.39    1.55
   6   3  14   21.74    1.71
  -6  -3  14   21.01    1.86
   7  -3  14    0.61    0.75
  -7   3  14   -0.44    1.13
   7  -3 -14    1.78    0.63
  -7  -3  14    0.93    1.11
   0  -4 -14   32.87    1.79
   0  -4  14   32.31    1.84
  -1   4  14   16.48    1.15
   1  -4  14   17.48    1.03
  -1  -4 -14   18.16    0.99
   1  -4 -14   16.03    1.01
   1   4  14   14.76    1.12
  -1  -4  14   14.02    1.13
   1   4  14   15.90    0.94
  -1  -4  14   16.52    1.15
   2  -4  14    8.68    0.70
   2  -4  14    9.29    0.84
  -2   4  14    8.57    0.79
   2   4  14    8.47    0.84
  -2  -4  14    9.59    0.86
  -2  -4  14    9.40    0.87
   2  -4 -14    9.54    0.73
   3  -4  14   10.26    0.87
   3  -4  14    8.69    0.74
  -3   4  14    8.68    0.87
  -3  -4  14   10.76    1.02
   3  -4 -14   11.08    0.81
   3   4  14    9.34    0.90
  -3  -4  14   10.49    0.94
  -4   4  14   12.00    1.16
   4  -4  14   15.23    1.10
   4  -4  14   15.51    1.21
   4  -4 -14   15.37    1.08
  -4  -4  14   16.13    1.27
   4   4  14   15.11    1.23
  -4  -4  14   14.82    1.30
   5   4 -14    2.58    0.55
   5  -4  14    2.70    0.69
  -5   4  14    2.36    0.74
   5  -4 -14    2.68    0.56
  -5  -4  14    3.88    0.86
   5   4  14    1.48    0.71
   6  -4  14    1.62    0.72
  -6   4  14    0.59    0.85
   6   4 -14   -0.04    0.54
   6  -4 -14    0.34    0.51
  -6  -4  14    0.21    0.94
   6   4  14    0.59    0.70
   7  -4  14    5.67    0.95
  -7   4  14    4.77    1.28
  -7  -4  14    7.30    1.42
   7  -4 -14    5.35    0.87
   7   4  14    6.09    0.96
   0  -5  14    9.52    0.77
   0   5  14    9.74    0.82
   0  -5 -14   10.78    0.73
   0   5  14    9.67    0.66
   0  -5  14   10.13    0.90
   1  -5  14   11.04    0.76
  -1  -5 -14    9.46    0.70
   1  -5  14   10.17    0.90
  -1   5  14   10.32    0.85
   1   5  14    8.81    0.67
  -1  -5  14   12.34    0.90
  -1  -5  14    9.23    0.87
   1   5  14    9.72    0.87
   1  -5 -14    9.96    0.73
  -2   5  14   22.36    1.44
   2  -5  14   22.35    1.27
   2  -5  14   21.13    1.42
  -2  -5  14   20.04    1.46
  -2  -5  14   23.49    1.52
   2   5  14   21.15    1.50
   2  -5 -14   21.93    1.32
  -3   5  14    4.34    0.68
   3  -5  14    5.81    0.69
  -3  -5  14    5.60    0.80
   3  -5 -14    3.82    0.53
   3   5  14    3.47    0.67
  -3  -5  14    3.59    0.73
   4  -5  14    2.40    0.63
  -4   5  14    0.40    0.63
   4  -5 -14    1.65    0.44
   4   5  14    0.76    0.60
  -4  -5  14    1.55    0.62
  -4  -5  14    1.06    0.73
   5   5 -14   13.28    1.00
   5  -5  14   12.01    1.12
  -5   5  14   11.58    1.25
   5  -5 -14   11.73    0.99
   5   5  14   10.88    1.10
  -5  -5  14   11.21    1.30
   6  -5  14    8.33    1.02
   6   5 -14    7.92    0.90
  -6   5  14    9.78    1.32
   6  -5 -14    8.95    0.93
  -6  -5  14    8.84    1.25
   6   5  14    8.15    1.07
  -7   5  14    0.63    1.17
   7   5 -14    1.11    0.67
  -7  -5  14    1.45    1.27
   7  -5 -14    1.34    0.73
   7   5  14    0.71    0.89
   0   6  14    2.37    0.35
   0  -6  14    2.83    0.62
   0  -6 -14    2.88    0.39
   0   6  14    2.16    0.47
   0  -6  14    2.52    0.48
  -1   6  14    0.85    0.40
   1  -6  14    0.64    0.48
   1  -6 -14    0.91    0.34
   1   6  14    1.05    0.48
  -1  -6  14    0.88    0.50
  -1  -6  14    0.82    0.53
   1   6  14    0.53    0.30
  -2   6  14    6.96    0.72
   2  -6  14    6.21    0.74
  -2  -6  14    6.30    0.77
   2  -6 -14    6.24    0.62
   2   6  14    7.64    0.58
  -2  -6  14    7.69    0.84
   2   6  14    7.05    0.82
  -3   6  14    7.29    0.81
   3  -6  14    6.18    0.73
  -3  -6  14    3.50    0.76
   3   6  14    5.12    0.80
  -3  -6  14    4.79    0.82
   3  -6 -14    4.33    0.59
  -4   6  14   -0.04    0.65
   4  -6  14    1.27    0.66
  -4  -6  14    1.09    0.70
   4   6  14    1.31    0.71
   4  -6 -14    1.50    0.46
  -4  -6  14    0.88    0.77
   5   6 -14    0.26    0.52
  -5   6  14    0.01    0.77
   5  -6  14   -0.79    0.62
   5   6  14   -0.35    0.63
  -5  -6  14   -0.07    0.87
   5  -6 -14    0.12    0.52
   6   6 -14    0.33    0.59
  -6   6  14    0.10    0.99
   6  -6  14    0.29    0.78
   6  -6 -14    0.65    0.66
  -6  -6  14    0.34    1.08
   6   6  14    0.08    1.19
   7  -6  14    2.54    0.94
   7   6 -14    2.59    0.74
  -7   6  14    3.02    1.28
   7   6  14    1.85    0.95
  -7  -6  14    2.30    1.37
   7  -6 -14    1.10    0.78
   0   7  14   30.99    1.77
   0  -7  14   25.54    1.82
   0   7  14   28.63    1.61
  -1   7  14    2.60    0.54
   1  -7  14    4.44    0.68
   1   7  14    3.66    0.46
  -1  -7  14    2.86    0.60
   1  -7 -14    3.04    0.46
   1   7  14    3.39    0.60
   2  -7  14    1.97    0.58
  -2   7  14    3.08    0.57
   2   7  14    3.05    0.68
   2  -7 -14    2.46    0.49
  -2  -7  14    3.11    0.79
  -2   7 -14    3.58    0.52
  -2  -7  14    2.60    0.63
   2   7  14    3.88    0.47
   3  -7  14    2.06    0.70
  -3   7  14    1.18    0.59
  -3  -7  14    1.38    0.74
   3   7  14    1.64    0.68
  -3  -7  14    1.27    0.66
   3  -7 -14    1.79    0.51
   4  -7  14   17.64    1.34
  -4   7  14   14.45    1.29
  -4  -7  14   16.01    1.45
   4   7  14   15.48    1.30
   4  -7 -14   14.98    1.20
  -4  -7  14   15.46    1.38
   5  -7  14    1.70    0.79
   5   7 -14    1.83    0.58
  -5   7  14    1.53    0.85
   5  -7 -14    0.85    0.62
  -5  -7  14    0.61    0.99
   5   7  14   -0.04    0.77
   6  -7  14   -0.38    0.77
   6   7 -14   -0.12    0.58
  -6   7  14    0.53    1.16
  -6  -7  14    0.17    1.16
   6  -7 -14    0.14    0.71
   6   7  14    0.63    0.79
   0   8  14    3.89    0.50
   0  -8  14    2.94    0.71
   0   8  14    3.65    0.60
  -1   8  14    8.79    0.81
   1  -8  14    5.97    0.78
   1   8  14    9.10    0.69
   1   8  14    6.11    0.75
  -1  -8  14    6.53    0.88
   2  -8  14    4.53    0.70
  -2   8  14    4.24    0.66
  -2  -8  14    3.85    0.75
  -2   8 -14    3.98    0.59
   2   8  14    3.35    0.73
   2   8  14    4.37    0.51
  -3   8  14    0.87    0.60
   3  -8  14    0.27    0.65
  -3  -8  14    1.58    0.73
   3   8  14    1.28    0.64
   3  -8 -14    1.18    0.55
   3   8  14    0.52    0.42
   4  -8  14    6.77    0.94
  -4   8  14   10.36    1.11
  -4  -8  14    8.40    1.03
   4  -8 -14   10.02    0.94
   4   8  14    8.49    1.04
  -5   8  14    0.49    0.91
  -5  -8  14    0.65    0.84
  -5  -8  14   -0.07    1.16
   5  -8 -14    0.97    0.72
   6   8 -14    0.79    0.70
  -6   8  14    1.88    1.14
   6  -8  14    0.93    0.90
  -6  -8  14    0.62    1.26
   6   8  14    0.18    0.85
   6  -8 -14    1.67    0.82
   0  -9  14    2.26    0.70
   0   9  14    1.53    0.45
   0   9  14    3.02    0.62
  -1   9  14    5.13    0.70
   1  -9  14    3.90    0.73
   1   9  14    4.29    0.59
   1   9  14    5.73    0.76
  -1  -9  14    5.09    0.84
   2  -9  14    1.36    0.68
  -2   9  14    0.69    0.56
  -2  -9  14    1.41    0.65
  -2   9 -14    0.33    0.57
   2   9  14    0.95    0.65
   2   9  14    0.86    0.49
  -3   9  14    0.33    0.57
   3  -9  14    1.22    0.77
   3   9  14    2.12    0.54
   3  -9 -14    0.59    0.62
  -3  -9  14    0.37    0.65
   3   9  14    0.65    0.74
  -3   9 -14    0.36    0.59
  -4   9  14    1.04    0.80
   4  -9 -14    0.81    0.67
   4   9  14    0.06    0.76
   4   9  14    0.94    0.53
  -4  -9  14    0.83    0.84
   5  -9  14   -0.10    0.84
  -5   9  14    0.91    0.98
   5  -9 -14    0.21    0.76
   5   9  14    0.05    0.90
  -5  -9  14    1.99    1.01
   0  10  14    0.87    0.55
   0 -10  14    1.37    0.74
   0  10  14    1.22    0.50
  -1  10  14    5.27    0.75
   1 -10  14    7.47    0.94
  -1 -10  14    7.36    0.97
   1  10  14    8.13    0.74
   1  10  14    7.34    0.86
   2 -10  14    0.95    0.76
  -2  10  14    3.07    0.69
   2  10  14    1.80    0.65
  -2 -10  14    1.94    0.79
   2  10  14    1.64    0.56
  -3  10  14    0.78    0.67
   3  10  14    0.58    0.76
  -3 -10  14    0.28    0.79
  -3  10 -14    0.78    0.65
   3  10  14    0.07    0.50
   4 -10  14    0.28    0.78
  -4  10  14    0.69    0.87
  -4 -10  14    0.20    0.89
   4 -10 -14    0.56    0.79
   4  10  14    0.57    0.60
   4  10  14   -1.11    0.82
   5 -10  14    0.81    0.96
   5  10  14   -0.94    0.97
  -5 -10  14    0.15    0.96
   5  10  14    1.54    0.65
   5 -10 -14   -0.46    0.83
   0  11  14    4.21    0.67
   0 -11  14    3.34    0.89
   0  11  14    3.36    0.70
  -1  11  14    2.92    0.66
  -1 -11  14    3.95    0.82
   1  11  14    2.45    0.71
   1  11  14    2.63    0.64
  -2  11  14    0.68    0.67
   2 -11  14   -0.05    0.76
   2  11  14    0.56    0.70
  -2 -11  14    0.70    0.82
   2  11  14    0.73    0.60
  -3  11  14    2.41    0.86
   3 -11  14    3.13    0.86
   3  11  14    2.79    0.67
   3  11  14    1.12    0.85
   4 -11  14    2.55    0.91
   4  11  14    1.75    0.93
  -4 -11  14    1.54    1.02
   4  11  14    1.80    0.73
   0  12  14    1.70    0.70
   0 -12  14    1.23    0.92
   1 -12  14    2.05    0.92
  -1  12  14    1.00    0.69
   1  12  14   -0.38    0.61
   1  12  14    0.21    0.69
  -1 -12  14    0.19    0.76
   2 -12  14    0.16    0.84
   2  12  14    0.36    0.73
  -2 -12  14    0.62    0.90
   2  12  14    0.22    0.65
   0   0  15    0.10    0.34
   0   0  15    0.14    0.43
   1   0  15    4.96    0.59
  -1   0  15    5.41    0.66
  -1   0  15    4.10    0.54
   1   0  15    4.40    0.51
   2   0  15    3.48    0.49
   2   0  15    2.98    0.48
   3   0 -15    1.82    0.39
  -3   0  15    2.10    0.55
   3   0  15    2.29    0.48
   4   0  15   12.79    1.05
  -4   0  15   11.87    1.14
   4   0  15   13.97    1.03
   4   0 -15   12.83    0.95
   5   0  15   -0.35    0.57
  -5   0  15   -0.07    0.74
   5   0 -15    0.18    0.41
  -6   0  15   -0.35    0.80
   6   0  15    0.20    0.64
   6   0 -15    0.48    0.50
   7   0 -15    0.30    0.57
   7   0  15   -0.87    0.76
  -7   0  15    1.80    1.16
   0   1  15   17.15    1.22
   0   1  15   17.53    1.14
   0  -1  15   18.48    1.12
   0  -1  15   17.51    1.23
  -1   1  15    2.17    0.53
   1  -1  15    2.38    0.51
  -1   1  15    1.04    0.39
   1  -1  15    3.27    0.45
   1   1  15    1.85    0.42
  -1  -1  15    2.45    0.56
  -1  -1  15    2.43    0.44
   1   1  15    2.68    0.49
   2  -1  15   12.44    0.94
   2  -1  15   12.02    0.97
  -2   1  15   13.31    0.97
   2  -1 -15   12.95    0.85
  -2  -1  15   10.94    1.00
  -2  -1  15   11.43    0.94
   2   1  15   10.34    0.87
   2   1  15   13.06    1.05
   3  -1  15   11.33    0.88
  -3   1  15    9.84    0.96
   3  -1  15   10.14    0.85
   3   1 -15   10.98    0.86
  -3  -1  15    9.28    0.94
   3  -1 -15   12.15    0.86
   3   1  15   10.20    0.81
   3   1  15   10.12    0.91
   4   1 -15    6.07    0.66
   4  -1  15    6.75    0.77
   4  -1  15    7.35    0.73
  -4   1  15    6.94    0.90
   4  -1 -15    7.15    0.71
  -4  -1  15    6.37    0.90
   4   1  15    7.22    0.78
   4   1  15    7.18    0.68
   5  -1  15    3.83    0.64
   5  -1  15    3.71    0.70
  -5   1  15    2.85    0.88
   5   1 -15    4.01    0.58
  -5  -1  15    3.87    0.94
   5   1  15    3.02    0.71
   5  -1 -15    3.77    0.56
   6   1 -15    2.61    0.57
  -6   1  15    1.86    0.89
   6  -1  15    1.16    0.68
  -6  -1  15    1.28    0.97
   6  -1 -15    1.87    0.54
   6   1  15    1.52    0.73
  -7   1  15    2.40    1.08
   7   1 -15    1.19    0.60
   7  -1  15    1.03    0.76
  -7  -1  15    1.92    1.19
   7  -1 -15    1.51    0.68
   7   1  15    1.44    0.86
   0  -2  15    1.80    0.40
   0   2  15    1.02    0.46
   0   2  15    2.51    0.49
   0  -2  15    1.13    0.47
   1  -2  15   19.80    1.25
  -1   2  15   19.49    1.32
   1  -2  15   21.64    1.34
  -1  -2  15   20.39    1.33
   1   2  15   22.58    1.35
   1  -2 -15   20.69    1.25
   2  -2  15    6.76    0.62
  -2   2  15    6.14    0.67
   2  -2  15    5.89    0.69
   2   2  15    7.72    0.64
  -2  -2  15    7.21    0.76
   2   2  15    7.72    0.77
   2  -2 -15    5.41    0.57
  -2  -2  15    6.12    0.71
   3  -2  15    4.80    0.65
   3  -2  15    5.28    0.63
  -3   2  15    5.64    0.73
   3  -2 -15    6.61    0.62
   3   2  15    5.89    0.70
  -3  -2  15    5.32    0.76
   3   2  15    6.49    0.60
  -3  -2  15    5.73    0.79
   4   2 -15    0.54    0.42
  -4   2  15    0.20    0.54
   4  -2  15    0.30    0.45
  -4  -2  15    1.04    0.68
   4   2  15   -0.09    0.53
   4  -2 -15    0.04    0.39
   5  -2  15   12.25    1.04
   5   2 -15   13.24    1.00
  -5   2  15   11.22    1.21
   5  -2  15   13.00    1.07
  -5  -2  15   11.91    1.27
   5   2  15   11.73    1.13
   5  -2 -15   13.46    1.02
   6  -2  15    0.72    0.66
   6   2 -15    0.63    0.50
  -6   2  15    0.80    0.84
   6  -2  15    0.72    0.67
   6  -2 -15    0.97    0.56
  -6  -2  15    1.58    1.02
   6   2  15    0.17    0.73
   7   2 -15    5.17    0.81
   7  -2  15    3.96    0.92
  -7   2  15    5.69    1.28
   7  -2 -15    4.87    0.79
  -7  -2  15    4.18    1.22
   0   3  15    7.37    0.67
   0  -3  15    7.58    0.65
   0  -3  15    6.78    1.10
   0  -3 -15    6.43    0.58
   1  -3  15    5.11    0.51
  -1   3  15    5.51    0.61
   1   3  15    4.73    0.57
   1   3  15    4.63    0.58
   1  -3 -15    4.23    0.49
  -1  -3  15    4.20    0.57
  -1  -3  15    5.64    0.69
   2  -3  15    3.25    0.44
   2  -3  15    3.66    0.55
  -2   3  15    3.19    0.52
  -2  -3  15    5.18    0.70
   2  -3 -15    3.84    0.47
   2   3  15    3.49    0.58
  -2  -3  15    3.65    0.62
   2   3  15    3.41    0.50
  -3   3  15    8.49    0.84
   3  -3  15    5.85    0.63
   3  -3  15    7.93    0.78
   3   3  15    6.86    0.81
   3  -3 -15    7.23    0.67
  -3  -3  15    6.42    0.83
  -3  -3  15    6.34    0.84
   4   3 -15    8.08    0.76
   4  -3  15    7.65    0.78
   4  -3  15    7.90    0.81
  -4   3  15   10.20    0.99
   4   3  15    8.08    0.89
   4  -3 -15    7.93    0.77
  -4  -3  15    8.34    1.01
  -5   3  15    3.30    0.81
   5  -3  15    2.36    0.66
   5   3 -15    2.93    0.58
   5  -3  15    2.35    0.64
   5  -3 -15    3.07    0.55
  -5  -3  15    4.06    0.88
   5   3  15    2.42    0.74
  -6   3  15    4.39    1.10
   6   3 -15    4.19    0.67
   6  -3  15    4.43    0.81
  -6  -3  15    4.29    1.06
   6   3  15    4.10    0.89
   6  -3 -15    4.76    0.72
   7   3 -15    1.89    0.63
  -7   3  15    2.65    1.11
   7  -3  15    2.37    0.91
   7  -3 -15    1.44    0.72
   7   3  15    1.40    0.90
  -7  -3  15    1.89    1.14
   0   4  15    0.41    0.42
   0  -4  15    0.99    0.41
   0  -4  15    1.40    0.53
   0  -4 -15    0.84    0.30
  -1  -4 -15   11.21    0.76
   1  -4  15   12.05    0.96
   1  -4  15   12.01    0.82
  -1   4  15   11.22    0.92
   1   4  15   10.91    0.89
   1  -4 -15   10.09    0.81
  -1  -4  15   10.74    0.89
  -1  -4  15    8.31    0.88
  -2   4  15   29.85    1.76
   2  -4  15   29.10    1.77
   2  -4  15   29.70    1.65
   2  -4 -15   29.61    1.68
  -2  -4  15   28.10    1.81
   2   4  15   27.42    1.78
  -2  -4  15   29.25    1.82
   3  -4  15    5.07    0.55
  -3   4  15    4.91    0.70
   3  -4  15    5.03    0.68
  -3  -4  15    5.75    0.82
   3  -4 -15    4.35    0.53
  -3  -4  15    4.33    0.71
   3   4  15    4.79    0.75
   4  -4  15   13.00    1.11
  -4   4  15   16.00    1.30
   4  -4  15   13.93    1.14
  -4  -4  15   13.89    1.27
   4   4  15   12.63    1.15
  -4  -4  15   12.40    1.16
   4  -4 -15   13.85    1.05
  -5   4  15    2.28    0.78
   5  -4  15    3.06    0.71
   5   4 -15    3.17    0.56
   5   4  15    2.08    0.70
  -5  -4  15    2.77    0.89
   5  -4 -15    2.24    0.55
  -6   4  15    1.08    0.99
   6  -4  15    1.15    0.70
   6   4 -15    0.72    0.53
   6   4  15    1.15    0.80
  -6  -4  15    0.14    0.92
   6  -4 -15    0.96    0.62
   7   4 -15    2.22    0.74
  -7   4  15    1.32    1.09
   7  -4  15    2.11    0.87
   7   4  15    0.34    0.91
  -7  -4  15    2.25    1.27
   7  -4 -15    1.38    0.67
   0  -5 -15   14.82    0.98
   0  -5  15   14.88    1.08
   0   5  15   15.40    1.13
   0  -5  15   16.50    1.22
  -1   5  15    3.25    0.54
   1  -5  15    3.62    0.47
   1  -5  15    2.02    0.57
  -1  -5  15    3.93    0.61
  -1  -5  15    3.63    0.60
   1  -5 -15    3.65    0.46
   1   5  15    2.06    0.52
  -2   5  15   15.29    1.19
   2  -5  15   17.38    1.24
  -2  -5  15   15.61    1.24
   2   5  15   11.65    1.12
   2   5  15   16.08    0.96
   2  -5 -15   16.40    1.04
  -2  -5  15   16.13    1.22
   3  -5  15    5.69    0.73
  -3   5  15    6.35    0.81
   3   5  15    5.10    0.75
  -3  -5  15    5.31    0.78
  -3  -5  15    7.28    0.91
   3  -5 -15    6.47    0.63
  -4   5  15    8.12    0.95
   4  -5  15    9.26    0.94
   4   5  15    5.87    0.86
  -4  -5  15    7.42    0.96
  -4  -5  15    7.92    1.06
   4  -5 -15    7.85    0.76
   5   5 -15    1.90    0.57
   5  -5  15    2.00    0.72
  -5   5  15    1.19    0.83
  -5  -5  15    2.78    0.99
   5  -5 -15    2.32    0.61
   5   5  15    1.24    0.77
  -6   5  15    5.19    1.09
   6   5 -15    5.71    0.79
   6  -5  15    5.39    0.89
   6  -5 -15    4.45    0.84
  -6  -5  15    5.18    1.13
   7   5 -15   -0.21    0.61
  -7   5  15   -0.55    1.14
   7  -5  15    0.33    0.83
   7   5  15   -1.39    0.80
   7  -5 -15   -0.29    0.75
  -7  -5  15    0.30    1.30
   0   6  15    1.36    0.49
   0  -6  15    0.85    0.55
   0  -6 -15    1.53    0.59
  -1   6  15    4.12    0.60
   1  -6  15    5.03    0.69
   1  -6 -15    5.28    0.55
   1   6  15    5.20    0.69
  -1  -6  15    5.13    0.71
  -1  -6  15    4.98    0.75
   2  -6  15    0.78    0.58
  -2   6  15    1.85    0.51
   2   6  15    1.22    0.37
   2   6  15    0.95    0.55
  -2  -6  15    1.33    0.65
  -2  -6  15    1.30    0.62
  -3   6  15    4.04    0.74
   3  -6  15    4.82    0.76
  -3  -6  15    3.99    0.84
  -3  -6  15    4.52    0.75
   3  -6 -15    5.03    0.60
   3   6  15    3.44    0.76
   4  -6  15    2.58    0.73
  -4   6  15    3.79    0.74
   4   6  15    1.10    0.72
   4  -6 -15    1.23    0.51
  -4  -6  15    1.95    0.69
  -4  -6  15    1.10    0.82
   5   6 -15    7.44    0.87
   5  -6  15    8.94    1.00
  -5   6  15   11.07    1.25
   5  -6 -15    9.55    0.93
   5   6  15    8.78    1.08
  -5  -6  15    9.07    1.27
  -6   6  15    2.91    1.17
  -6  -6  15    2.97    1.20
   6  -6 -15    2.02    0.72
   6   6  15    0.88    0.88
   0   7  15    0.79    0.49
   0  -7  15   -0.19    0.57
   1  -7  15    0.16    0.55
  -1   7  15    0.58    0.48
  -1  -7  15   -0.83    0.48
   1  -7 -15    0.22    0.40
   1   7  15    0.29    0.52
  -2   7  15    3.25    0.60
   2  -7  15    3.10    0.69
   2   7  15    2.89    0.47
   2  -7 -15    2.43    0.52
   2   7  15    3.95    0.72
  -2  -7  15    3.71    0.76
   3  -7  15    8.43    0.90
  -3   7  15    7.67    0.94
   3  -7 -15    7.94    0.78
   3   7  15   10.58    0.75
   3   7  15    8.59    0.94
  -3  -7  15    6.81    0.98
  -3  -7  15    7.62    1.03
   4  -7  15    1.84    0.72
  -4   7  15    1.78    0.77
  -4  -7  15    1.44    0.82
  -4  -7  15    1.83    0.89
   4   7  15    0.61    0.70
   4  -7 -15    1.63    0.59
   5   7 -15    6.91    0.83
   5  -7  15    7.13    1.01
  -5   7  15    6.97    1.11
  -5  -7  15    7.23    1.23
   5  -7 -15    6.33    0.88
   6  -7  15    1.56    0.88
  -6   7  15    2.58    1.05
   6   7 -15    2.59    0.73
   6   7  15    2.22    0.90
   6  -7 -15    1.59    0.77
  -6  -7  15    0.64    1.24
   0   8  15    0.57    0.47
   0  -8  15    0.23    0.63
   1  -8  15    7.71    0.91
  -1   8  15    5.39    0.74
   1   8  15    6.72    0.82
  -1  -8  15    7.48    0.92
   2  -8  15    4.33    0.75
  -2   8  15    4.46    0.74
  -2  -8  15    4.04    0.83
   2   8  15    5.26    0.59
   2  -8 -15    5.07    0.66
   2   8  15    6.28    0.84
   3  -8  15    0.19    0.60
  -3   8  15    0.19    0.56
  -3  -8  15    0.94    0.74
   3   8  15   -0.92    0.69
   3   8  15    0.13    0.44
   3  -8 -15    0.21    0.55
  -4   8  15    4.23    0.85
   4  -8  15    6.11    0.95
   4   8  15    5.02    0.99
  -4  -8  15    4.88    0.90
   4  -8 -15    4.83    0.81
   5  -8  15    2.07    0.86
  -5   8  15    0.53    0.95
   5  -8 -15    1.15    0.76
   5   8  15    0.53    0.82
   6   8 -15    0.45    0.71
   6   8  15   -0.49    0.99
   0  -9  15    4.26    0.79
   0   9  15    4.95    0.67
  -1   9  15    0.49    0.49
   1  -9  15    0.68    0.71
   1   9  15   -0.07    0.55
  -1  -9  15    0.85    0.69
  -2   9  15    4.14    0.69
   2  -9  15    3.77    0.80
  -2  -9  15    5.15    0.90
   2   9  15    4.92    0.80
   2   9  15    3.72    0.59
  -3   9  15    0.08    0.62
   3  -9  15    0.00    0.71
   3   9  15    0.43    0.52
  -3  -9  15    0.48    0.74
   3  -9 -15   -0.37    0.64
   3   9  15    0.07    0.76
  -4   9  15    2.08    0.80
   4  -9  15    2.39    0.92
   4   9  15    2.27    0.92
  -4  -9  15    1.00    0.91
   4   9  15    2.50    0.61
   4  -9 -15    2.27    0.77
  -5   9  15    0.33    1.04
   5  -9  15    1.95    0.87
   5   9  15   -0.82    0.93
  -5  -9  15    0.18    0.96
   5  -9 -15    0.63    0.82
   0 -10  15    3.06    0.78
   0  10  15    2.63    0.67
   1 -10  15    1.89    0.74
  -1  10  15    0.83    0.62
   1  10  15    1.43    0.64
  -1 -10  15    0.28    0.77
  -2  10  15    4.03    0.74
   2  10  15    4.17    0.96
  -2 -10  15    3.58    0.84
   2  10  15    6.16    0.91
   3 -10  15    0.19    0.77
  -3  10  15    0.79    0.72
  -3 -10  15   -0.05    0.99
   3  10  15   -0.04    0.56
   4 -10  15    1.27    0.87
  -4  10  15    2.69    1.10
  -4 -10  15    3.31    1.03
   4  10  15    1.17    0.68
   4  10  15    2.06    0.88
   0  11  15    3.18    0.72
   0 -11  15    4.00    0.93
  -1  11  15    2.15    0.72
   1 -11  15    2.76    0.83
   1  11  15    2.29    0.70
  -1 -11  15    2.49    0.86
   2 -11  15    2.11    0.90
  -2  11  15    1.53    0.76
  -2 -11  15    1.57    0.81
   3 -11  15    4.18    1.00
  -3  11  15    4.20    1.08
   3  11  15    3.22    0.97
   3  11  15    4.08    0.79
  -3 -11  15    4.31    1.02
   0 -12  15    1.47    0.84
   1 -12  15    0.57    0.92
   1  12  15    1.23    0.71
  -1 -12  15    1.07    0.90
   0   0  16    3.49    0.61
   0   0  16    3.67    0.54
  -1   0  16   -0.19    0.76
  -1   0  16    0.17    0.40
   1   0  16    0.13    0.43
   1   0  16    0.69    0.40
   2   0  16   -0.28    0.38
  -2   0  16    0.46    0.47
   2   0  16    0.09    0.41
  -2   0  16    0.16    0.51
   3   0 -16    1.56    0.44
  -3   0  16    0.71    0.53
   3   0  16    2.08    0.50
   3   0  16    1.56    0.50
   4   0  16    4.28    0.74
  -4   0  16    5.40    0.83
   4   0  16    6.10    0.68
   4   0 -16    6.21    0.66
  -5   0  16    1.38    0.83
   5   0  16   -0.30    0.55
   5   0 -16    0.46    0.49
   6   0  16   -0.37    0.71
  -6   0  16    0.44    0.97
   6   0 -16   -0.12    0.48
  -7   0  16    6.40    1.32
   7   0  16    6.16    1.18
   7   0 -16    6.16    0.85
   0   1  16    0.45    0.47
   0  -1  16   -0.01    0.45
   0  -1  16    0.46    0.38
   0   1  16   -0.33    0.35
  -1   1  16    1.95    0.54
  -1   1  16    1.77    0.43
   1  -1  16    2.37    0.41
   1  -1  16    1.97    0.50
  -1  -1  16    2.40    0.54
   1   1  16    1.91    0.48
  -1  -1  16    2.63    0.59
   1   1  16    2.20    0.44
   2  -1  16    0.09    0.39
   2  -1  16    0.68    0.45
  -2   1  16   -0.48    0.39
   2   1  16    0.78    0.44
   2   1  16    0.32    0.45
  -2  -1  16   -0.17    0.46
   2  -1 -16    0.44    0.37
  -2  -1  16    1.08    0.58
  -3   1  16    0.65    0.56
   3  -1  16    1.26    0.48
   3   1 -16    0.92    0.39
   3  -1  16    1.65    0.51
   3  -1 -16    1.70    0.44
  -3  -1  16    1.06    0.60
   3   1  16    0.58    0.45
   3   1  16    1.55    0.56
   4   1 -16    6.09    0.65
   4  -1  16    4.10    0.65
   4  -1  16    4.88    0.72
  -4   1  16    5.38    0.81
   4  -1 -16    5.23    0.60
  -4  -1  16    4.06    0.85
   4   1  16    4.38    0.71
   5   1 -16    8.34    0.83
  -5   1  16    9.89    1.17
   5  -1  16    7.77    0.84
   5  -1  16    8.72    0.95
  -5  -1  16    8.37    1.10
   5  -1 -16    8.30    0.83
   5   1  16    8.32    0.97
  -6   1  16    3.62    1.01
   6   1 -16    2.65    0.66
   6  -1  16    2.84    0.82
  -6  -1  16    2.70    1.00
   6   1  16    1.82    0.77
   6  -1 -16    2.87    0.61
   7  -1  16   -0.50    0.83
   7   1 -16    0.67    0.61
  -7   1  16    0.21    1.15
   7   1  16   -0.09    0.88
   7  -1 -16    0.90    0.71
  -7  -1  16    1.16    1.10
   0   2  16    1.43    0.50
   0   2  16    2.57    0.45
   0  -2  16    2.05    0.44
   0  -2  16    1.78    0.54
  -1   2  16   -0.07    0.35
   1  -2  16    0.90    0.35
   1  -2  16    0.26    0.50
  -1  -2  16    0.45    0.53
   1  -2 -16    0.49    0.35
   1   2  16    0.52    0.44
   1   2  16    1.31    0.41
  -1  -2  16    0.27    0.41
   2  -2  16   11.66    1.03
   2  -2  16   13.22    0.96
  -2   2  16   12.43    1.03
  -2  -2  16   14.29    1.07
  -2  -2  16   14.88    1.15
   2   2  16   14.39    1.10
   2  -2 -16   12.20    0.95
   2   2  16   13.90    1.02
  -3   2  16    2.08    0.61
   3  -2  16    2.36    0.57
   3  -2  16    1.82    0.46
   3  -2 -16    1.77    0.45
  -3  -2  16    0.92    0.61
   3   2  16    2.37    0.63
  -3  -2  16    2.59    0.68
  -4   2  16    3.95    0.73
   4  -2  16    4.17    0.64
   4   2 -16    3.31    0.54
   4  -2  16    3.57    0.63
   4  -2 -16    3.70    0.54
   4   2  16    4.23    0.71
  -4  -2  16    3.37    0.77
   5   2 -16    0.56    0.45
   5  -2  16    0.25    0.61
   5  -2  16    0.02    0.55
  -5   2  16   -0.08    0.69
   5  -2 -16   -0.32    0.49
  -5  -2  16    0.49    0.86
   5   2  16    0.34    0.71
  -6   2  16    0.24    0.90
   6   2 -16    1.44    0.61
   6  -2  16    1.21    0.76
   6  -2  16    2.51    0.76
   6  -2 -16    1.44    0.63
  -6  -2  16    1.62    0.98
   6   2  16    0.64    0.77
   7   2 -16    0.73    0.70
  -7   2  16   -0.02    1.04
  -7  -2  16   -0.82    1.19
   7  -2 -16    0.29    0.61
   7   2  16   -0.82    0.78
   0  -3  16    8.20    0.83
   0   3  16    8.63    0.75
   0  -3 -16    8.25    0.69
   0  -3  16    9.19    0.75
   1  -3  16    0.39    0.43
   1  -3  16    0.86    0.36
  -1   3  16    1.22    0.46
   1   3  16    1.22    0.42
  -1  -3  16    0.94    0.47
   1  -3 -16    0.78    0.36
  -1  -3  16    0.92    0.53
   1   3  16    0.60    0.45
   2  -3  16    1.40    0.40
   2  -3  16    1.91    0.55
  -2   3  16    1.42    0.47
   2   3  16    0.69    0.47
   2   3  16    2.15    0.54
   2  -3 -16    2.17    0.42
  -2  -3  16    2.19    0.54
  -2  -3  16    1.30    0.62
   3  -3  16    2.03    0.46
   3  -3  16    2.23    0.58
  -3   3  16    1.63    0.61
   3  -3 -16    2.08    0.43
  -3  -3  16    1.88    0.67
  -3  -3  16    3.37    0.67
   3   3  16    0.97    0.62
   4  -3  16    7.35    0.82
  -4   3  16    4.99    0.87
   4  -3  16    6.27    0.77
   4   3 -16    6.99    0.75
   4  -3 -16    5.86    0.69
   4   3  16    6.27    0.89
  -4  -3  16    7.86    0.98
  -5   3  16    1.31    0.74
   5   3 -16    0.53    0.51
   5  -3  16    0.31    0.60
   5  -3  16    1.41    0.64
   5   3  16    0.57    0.72
   5  -3 -16    1.64    0.53
  -5  -3  16    1.57    0.92
   6   3 -16    0.47    0.60
   6  -3  16    0.93    0.69
   6  -3 -16    0.73    0.61
   6   3  16    0.84    0.81
  -6  -3  16    0.11    1.02
  -7   3  16    1.25    1.24
   7   3 -16    0.64    0.72
  -7  -3  16    0.23    1.24
   7  -3 -16    0.26    0.71
   7   3  16    0.62    0.84
   0   4  16    0.99    0.45
   0  -4  16    0.85    0.53
   0  -4 -16    0.77    0.35
   0  -4  16    0.68    0.43
   1  -4  16   10.34    0.95
  -1  -4 -16   10.45    0.77
  -1   4  16    9.47    0.87
   1  -4  16   10.81    0.81
   1  -4 -16   10.26    0.81
   1   4  16   10.14    0.87
  -1  -4  16   10.24    0.94
  -1  -4  16   11.14    0.92
   2  -4  16    0.68    0.55
   2  -4  16    0.74    0.35
  -2   4  16    1.09    0.48
  -2  -4  16    1.15    0.61
   2  -4 -16    1.35    0.41
   2   4  16    1.15    0.56
  -3   4  16    2.99    0.62
   3  -4  16    2.71    0.59
   3  -4  16    3.24    0.49
  -3  -4  16    2.47    0.72
  -3  -4  16    3.88    0.79
   3   4  16    2.87    0.71
   3  -4 -16    3.26    0.48
  -4   4  16    1.52    0.66
   4  -4  16    2.38    0.66
   4  -4 -16    3.27    0.58
  -4  -4  16    1.44    0.81
   4   4  16    1.03    0.72
  -4  -4  16    2.98    0.75
   5  -4  16    7.57    0.93
  -5   4  16    7.65    1.06
   5   4 -16    7.04    0.82
   5  -4 -16    7.36    0.79
  -5  -4  16    6.27    1.17
   5   4  16    8.20    1.02
   6  -4  16    2.51    0.83
  -6   4  16    1.18    1.11
   6  -4 -16    2.23    0.76
   6   4  16    2.51    0.93
  -6  -4  16    1.72    1.15
  -7   4  16    0.71    1.23
   7   4 -16    0.58    0.74
   7  -4  16    0.50    1.42
   7   4  16   -0.27    0.91
   7  -4 -16    0.18    0.75
  -7  -4  16    0.48    1.25
   0  -5  16   18.49    1.32
   0  -5  16   15.18    1.18
   0  -5 -16   16.79    1.07
   0   5  16   16.63    1.22
   1  -5  16    9.70    0.76
  -1   5  16    8.30    0.81
   1  -5  16    8.18    0.86
  -1  -5  16    9.61    0.85
   1   5  16    7.75    0.81
   1  -5 -16    8.63    0.71
  -1  -5  16    7.57    0.86
   2  -5  16    0.84    0.58
  -2   5  16    0.21    0.49
   2   5  16    0.32    0.57
   2  -5 -16   -0.03    0.38
  -2  -5  16    0.11    0.52
  -2  -5  16   -0.05    0.62
   3  -5  16   30.98    2.02
  -3   5  16   31.97    2.02
  -3  -5  16   31.40    2.11
  -3  -5  16   32.09    2.13
   3  -5 -16   33.15    1.90
   3   5  16   32.06    2.02
   4  -5  16    0.01    0.62
  -4   5  16    0.34    0.69
  -4  -5  16   -0.35    0.81
  -4  -5  16   -0.12    0.70
   4   5  16    0.02    0.71
   4  -5 -16    0.70    0.45
   5   5 -16    3.66    0.71
[truncated: 51,391 more chars]
